# Supplementary material
Source: Research Square preprint supplement (doi:10.21203/rs.3.rs-8008141/v1)
Supplement: Supplementary file 1 [file 19613fd04b5db15b3eb87257.xlsx]

## Sheet: C_auris_GATK_indels
Predicted mutations
seq id	position	mutation	470140_indel	Wrinkled-E_indel	Wrinkled-F_indel	Wrinkled-H_indel	Smooth-A_indel	Smooth-B_indel	Smooth-C_indel	annotation	gene	common gene name	description
Chr1	435112	+C		0.986		0.985	0.973	0.986		intergenic (‑200/+1004)	CAUR0G01850 ← / ← CAUR0G01860		hypothetical protein/hypothetical protein
Chr1	475264	Δ12 bp		0.991	0.991	0.992				coding (448‑459/2154 nt)	CAUR0G02030 →	TCC1	hypothetical protein
Chr1	843505	+CAA					0.983		0.983	intergenic (‑752/‑781)	CAUR0G03740 ← / → CAUR0G03750		hypothetical protein/hypothetical protein
Chr1	1897431	Δ1 bp			0.97	0.928	0.95	0.958	0.961	intergenic (+2037/‑448)	CAUR0G08560 → / → CAUR0Gtrna13L		hypothetical protein/tRNA‑Leu
Chr1	2058888	Δ1 bp		0.991	0.989	0.991				coding (1721/2097 nt)	CAUR0G09340 ←	YAK1	hypothetical protein
Chr1	2355746	+T		0.927	0.877	0.907	0.883			intergenic (‑620/+604)	CAUR0G10670 ← / ← CAUR0G10680		hypothetical protein/hypothetical protein
Chr1	2769558	+T	0.868	0.952	0.962				0.908	intergenic (+387/‑179)	CAUR0G12450 → / → CAUR0G12460		hypothetical protein/hypothetical protein
Chr1	2920611	Δ1 bp		0.925	0.861		0.95	0.879	0.97	intergenic (‑407/‑1241)	CAUR0G13120 ← / → CAUR0G13130		hypothetical protein/hypothetical protein
Chr1	3680863	+C		0.987		0.987	0.988	0.987	0.947	intergenic (‑152/‑152)	CAUR0G16450 ← / → CAUR0G16460		hypothetical protein/hypothetical protein
Chr1	3680877	+TTTC		0.987		0.988			0.989	intergenic (‑166/‑138)	CAUR0G16450 ← / → CAUR0G16460		hypothetical protein/hypothetical protein
Chr2	838063	+T	0.849		0.949	0.987	0.941	0.977	0.956	intergenic (+180/+96)	CAUR0F03890 → / ← CAUR0F03900		hypothetical protein/hypothetical protein
Chr2	898846	+CA					0.983		0.987	intergenic (‑575/+982)	CAUR0F04100 ← / ← CAUR0F04110		hypothetical protein/hypothetical protein
Chr2	1812881	Δ1 bp					0.99		0.982	intergenic (‑1075/‑537)	CAUR0F07920 ← / → CAUR0F07930		hypothetical protein/hypothetical protein
Chr3	80939	Δ2 bp		0.972	0.951	0.97	0.958		0.974	intergenic (+1801/‑6752)	CAUR0E00370 → / → CAUR0E00380		hypothetical protein/hypothetical protein
Chr3	1012238	+GAA					0.983		0.983	intergenic (‑355/+590)	CAUR0E04440 ← / ← CAUR0E04450		hypothetical protein/hypothetical protein
Chr3	1053655	+AG		0.886			0.983	0.966	0.914	intergenic (+79/+259)	CAUR0E04630 → / ← CAUR0E04640		hypothetical protein/hypothetical protein
Chr3	1169938	Δ1 bp		0.932	0.955	0.963	0.958	0.931	0.931	intergenic (‑1697/‑537)	CAUR0E05130 ← / → CAUR0E05140		hypothetical protein/hypothetical protein
Chr4	34244	Δ1 bp				0.954		0.916	0.912	intergenic (‑189/+7912)	CAUR0D00160 ← / ← CAUR0D00170		hypothetical protein/hypothetical protein
Chr4	726081	+A		0.954	0.954	0.941		0.93		intergenic (+856/+1219)	CAUR0D03110 → / ← CAUR0D03120		hypothetical protein/hypothetical protein
Chr4	964800	Δ1 bp		0.96	0.933	0.873	0.919	0.971		intergenic (‑1890/‑882)	CAUR0D04230 ← / → CAUR0D04240		hypothetical protein/hypothetical protein
Chr5	891586	Δ1 bp		0.954	0.986	0.906	0.895		0.972	intergenic (+9073/+8521)	CAUR0B03380 → / ← CAUR0B03390		hypothetical protein/hypothetical protein
Chr6	737778	+TTTTTA			0.952	0.971		0.983	0.966	intergenic (‑1782/‑557)	CAUR0A03250 ← / → CAUR0A03260		hypothetical protein/hypothetical protein
Chr6	991754	+TT	0.983				0.949		0.988	intergenic (‑66/‑10759)	CAUR0A04280 ← / → CAUR0A04290		hypothetical protein/hypothetical protein
Indels called in DNA sequences obtained from three 470140 wrinkled (E, F, and H) and three 470140 smooth (A, B, and C) morphotypes colonies.
These indels are only present in 470140 smooth morphotype colonies, therefore they are unlikely to cause the wrinkled phenotype.
These indels are present in both 470140 smooth and wrinkled morphotypes colonies, therefore they are unlikely to cause the wrinkled phenotype.
These indels are present in three out of three 470140 wrinkled morphotype colonies and in no other colonies, therefore they are likely to cause of the wrinkled phenotype.

## Sheet: C.auris_GATK_SNPs
Predicted mutations
seq id	position	mutation	470140_SNPs	Wrinkled-E_SNPs	Wrinkled-F_SNPs	Wrinkled-H_SNPs	Smooth-A_SNPs	Smooth-B_SNPs	Smooth-C_SNPs	annotation	gene	common gene name	description
Chr1	2142730	T→A			0.979	0.991				intergenic (‑755/+52)	CAUR0G09750 ← / ← CAUR0G09760		hypothetical protein/hypothetical protein
Chr1	3147563	G→T		0.99	0.989	0.99				Y300* (TAC→TAA)	CAUR0G14050 ←	RXT3	hypothetical protein
Chr1	3647553	A→G		0.93	0.929					intergenic (‑360/‑330)	CAUR0G16290 ← / → CAUR0G16300		hypothetical protein/hypothetical protein
Chr1	4146477	T→G		0.992	0.991	0.992	0.992		0.992	G54G (GGT→GGG)	CAUR0G18480 →		hypothetical protein
Chr5	553409	A→G				0.964	0.944		0.973	intergenic (+240/‑183)	CAUR0B01990 → / → CAUR0B02000		hypothetical protein/hypothetical protein
Single nucleotide variants called in DNA sequences obtained from three 470140 wrinkled (E, F, and H) and three 470140 smooth (A, B, and C) morphotypes colonies.
These SNPs are present in both 470140 smooth and wrinkled morphotypes, therefore they are unlikely to cause the wrinkled phenotype.
These SNPs are only present in two out of three of the 470140 wrinkled morphotype colonies, so they are unlikely to be causing the wrinkled phenotype
This SNP is present in three out of three 470140 wrinkled morphotype colonies and in no other colonies, also this mutation causes a loss of function. This is a candidate locus for the cause of the wrinkled phenotype.
