# Supplementary material
Source: Research Square preprint supplement (doi:10.21203/rs.3.rs-8008141/v1)
Supplement: Supplementary file 2 [file c68f262de51bff6085289504.xlsx]

## Sheet: Fig2B_Smooth vs Wrinkled Glu
cut-off of FDR < 0.01 and log2 Fold Change (log2FC) ± 0.585
Downregulated genes relative to Smooth on glucose
gene	C. albicans ortholog	C. albicans best hit	S. cerevisiae ortholog	S. cerevisiae best hit	product	wrinkled glucose	smooth glucose	FDR	AveExpr	P value	S1_Glu	S2_Glu	S3_Glu	W1_Glu	W2_Glu	W3_Glu	S1_Lac	S2_Lac	S3_Lac	W1_Lac	W2_Lac	W3_Lac	S1_Glu CPM	S2_Glu CPM	S3_Glu CPM	W1_Glu CPM	W2_Glu CPM	W3_Glu CPM	S1_Lac CPM	S2_Lac CPM	S3_Lac CPM	W1_Lac CPM	W2_Lac CPM	W3_Lac CPM
B9J08_004296	NA	NA	NA	NA	mRNA Ortholog of C. albicans SC5314 : C5_04690C_A, C. parapsilosis CDC317 : CPAR2_101170, Candida tenuis NRRL Y-1498 : CANTEDRAFT_113855 and Debaryomyces hansenii CBS767 : DEHA2G20240g	-2.09206	0	0.000581625	3.81449	7.14009e-06	199	109	90	45	10	28	349	292	382	173	179	81	17.182	14.278	12.665	4.887	2.264	3.29	47.205	35.75	43.554	21.469	20.319	14.913
B9J08_002480	NA	HGT7	NA	GAL2	mRNA Has domain(s) with predicted transmembrane transporter activity, role in transmembrane transport and integral component of membrane, membrane localization	-2.0089	0	0.000180484	10.339	1.45288e-06	11962	7315	9763	3972	1290	1510	52551	79893	51491	12457	9077	6121	1032.83	958.23	1373.9	431.363	292.044	177.446	7107.94	9781.28	5870.75	1545.9	1030.39	1126.93
B9J08_002244	NA	NA	NA	NA	mRNA Protein of unknown function	-1.9526	0	5.59562e-05	9.19341	2.4e-07	7599	4738	5961	2574	671	1246	11742	19856	14711	4078	3721	2989	656.114	620.655	838.863	279.539	151.908	146.423	1588.2	2430.97	1677.28	506.074	422.393	550.301
B9J08_001581	NA	orf19.2552	NA	PMR1	mRNA Has domain(s) with predicted ATPase-coupled cation transmembrane transporter activity, metal ion binding, nucleotide binding activity, role in cation transport and integral component of membrane localization	-1.88543	0	9.50323e-05	5.48598	5.74e-07	2426	2292	1988	591	350	639	100	353	135	85	85	56	209.466	300.241	279.762	64.183	79.237	75.092	13.526	43.218	15.392	10.548	9.649	10.31
B9J08_004204	JEN2	NA	NA	JEN1	mRNA Ortholog(s) have carboxylic acid transmembrane transporter activity and role in carboxylic acid transport	-1.88065	0	0.000346822	7.33966	3.42006e-06	1577	740	760	479	143	153	3636	2830	4839	3247	4130	2310	136.162	96.936	106.951	52.02	32.374	17.98	491.798	346.476	551.719	402.948	468.822	425.292
B9J08_000146	NA	NA	IME4	NA	mRNA Ortholog(s) have mRNA (N6-adenosine)-methyltransferase activity and role in mRNA methylation, meiotic DNA replication initiation, meiotic cell cycle, negative regulation of pseudohyphal growth	-1.85162	0	5.30272e-05	2.03499	2.13e-07	236	170	166	67	22	50	9	14	11	8	11	12	20.377	22.269	23.36	7.276	4.981	5.876	1.217	1.714	1.254	0.993	1.249	2.209
B9J08_004176	NA	LIP10	NA	NA	mRNA Has domain(s) with predicted triglyceride lipase activity and role in lipid catabolic process	-1.77377	0	0.00217272	5.08265	3.32314e-05	824	314	280	171	64	101	606	352	746	195	265	150	71.146	41.133	39.403	18.571	14.489	11.869	81.966	43.095	85.055	24.199	30.082	27.616
B9J08_002669	PCK1	NA	PCK1	NA	mRNA Ortholog(s) have phosphoenolpyruvate carboxykinase (ATP) activity, role in carbon utilization and cytosol localization	-1.73935	0	1.73259e-05	8.56489	5.58e-08	2244	1342	1360	752	227	366	9336	10294	12912	13137	12691	7257	193.752	175.796	191.386	81.668	51.391	43.01	1262.77	1260.29	1472.16	1630.28	1440.63	1336.08
B9J08_005081	AUT7	NA	ATG8	NA	mRNA Ortholog(s) have phosphatidylethanolamine binding, protein tag activity	-1.56706	0	3.42815e-05	8.19324	1.24e-07	13762	5756	5160	3000	1416	2161	1715	1502	1963	914	1247	809	1188.24	754.009	726.142	325.803	320.569	253.948	231.968	183.89	223.812	113.426	141.555	148.944
B9J08_000005	NA	NA	NA	NA	mRNA Protein of unknown function	-1.56187	0	3.68138e-06	3.83662	8.15e-09	586	429	407	157	84	178	25	16	35	89	125	78	50.597	56.197	57.275	17.05	19.017	20.918	3.381	1.959	3.991	11.045	14.19	14.36
B9J08_001487	NA	SIT1	NA	ARN1	mRNA Has domain(s) with predicted transmembrane transporter activity, role in transmembrane transport and integral component of membrane localization	-1.5363	0	0.00224667	7.25921	3.52666e-05	3074	2155	1961	1294	356	656	1372	575	1429	928	1575	1140	265.416	282.295	275.962	140.53	80.595	77.089	185.574	70.397	162.928	115.163	178.788	209.884
B9J08_005063	NA	NA	NA	NA	mRNA Protein of unknown function	-1.52513	0	0.000462848	4.71512	5.12309e-06	366	231	264	160	46	69	724	568	760	137	126	75	31.601	30.26	37.151	17.376	10.414	8.108	97.927	69.54	86.652	17.002	14.303	13.808
B9J08_002688	FDH1	NA	FDH1	NA	mRNA Ortholog(s) have formate dehydrogenase (NAD+) activity, role in formate catabolic process and cytosol, extracellular region, intracellular localization	-1.48138	0	6.36202e-06	4.663	1.79e-08	766	696	587	306	111	232	126	126	157	68	99	72	66.138	91.173	82.606	33.232	25.129	27.263	17.043	15.426	17.9	8.439	11.238	13.256
B9J08_002515	NA	NA	NA	NA	mRNA Ortholog of C. albicans SC5314 : C1_12690C_A, C. dubliniensis CD36 : Cd36_11870, C. parapsilosis CDC317 : CPAR2_201650 and Candida tenuis NRRL Y-1498 : cten_CGOB_00224	-1.36122	0	5.79592e-05	4.18326	2.8e-07	531	383	377	189	104	145	92	90	97	50	100	62	45.848	50.171	53.053	20.526	23.545	17.04	12.444	11.019	11.059	6.205	11.352	11.415
B9J08_001499	NA	SIT1	NA	SIT1	mRNA Has domain(s) with predicted transmembrane transporter activity, role in transmembrane transport and integral component of membrane localization	-1.34509	0	0.000559636	4.63027	6.70725e-06	1880	1970	1542	781	355	732	53	66	23	11	47	44	162.323	258.061	216.998	84.817	80.369	86.02	7.169	8.08	2.622	1.365	5.335	8.101
B9J08_001171	NA	ADH5	NA	ADH2	mRNA Has domain(s) with predicted oxidoreductase activity, transferase activity, transferring acyl groups other than amino-acyl groups, zinc ion binding activity and role in oxidation-reduction process	-1.33817	0	2.2469e-05	11.5676	7.69e-08	24810	15250	14961	9931	3733	5565	88463	86273	93785	33859	38322	25029	2142.15	1997.68	2105.39	1078.52	845.117	653.966	11965.3	10562.4	10692.9	4201.85	4350.16	4608.06
B9J08_001015	HGT13	NA	NA	STL1	mRNA Has domain(s) with predicted transmembrane transporter activity, role in transmembrane transport and integral component of membrane, membrane localization	-1.32145	0	0.00577322	5.25741	0.000130127	273	167	156	136	47	44	778	726	899	777	923	576	23.571	21.876	21.953	14.77	10.64	5.171	105.231	88.884	102.5	96.425	104.775	106.047
B9J08_004656	NA	NA	NA	NA	mRNA Has domain(s) with predicted acyl-CoA dehydrogenase activity, flavin adenine dinucleotide binding, oxidoreductase activity, acting on the CH-CH group of donors activity and role in oxidation-reduction process	-1.31588	0	0.000380722	7.46888	3.98421e-06	3646	2216	2548	1661	526	888	1130	1768	1522	1058	1035	794	314.804	290.285	358.568	180.386	119.082	104.353	152.842	216.456	173.531	131.296	117.489	146.182
B9J08_002228	NA	NA	NA	NA	mRNA Protein of unknown function	-1.27452	0	0.00258679	6.09824	4.5291e-05	1376	446	499	347	135	272	1126	936	1094	482	585	369	118.807	58.424	70.222	37.685	30.563	31.964	152.301	114.594	124.733	59.816	66.407	67.936
B9J08_000685	NA	orf19.1037	NA	NA	mRNA Protein of unknown function	-1.19261	0	0.00483225	2.12456	0.000101138	169	85	85	57	21	49	22	25	28	11	15	9	14.592	11.135	11.962	6.19	4.754	5.758	2.976	3.061	3.192	1.365	1.703	1.657
B9J08_004602	OPT1	NA	OPT1	NA	mRNA Ortholog(s) have oligopeptide transmembrane transporter activity, proton-dependent oligopeptide secondary active transmembrane transporter activity, tetrapeptide transmembrane transporter activity	-1.16828	0	0.000219695	5.47188	1.85695e-06	485	387	352	184	85	208	351	296	462	575	812	527	41.876	50.695	49.535	19.983	19.243	24.443	47.476	36.239	52.675	71.357	92.175	97.025
B9J08_000221	NA	NA	NA	NA	mRNA Protein of unknown function	-1.07064	0	0.000462848	4.70556	5.06065e-06	1427	1532	1054	746	290	655	60	53	35	38	68	44	123.21	200.685	148.324	81.016	65.653	76.972	8.115	6.489	3.991	4.716	7.719	8.101
B9J08_003628	NA	POX1-3	NA	POX1	mRNA Ortholog(s) have role in fatty acid beta-oxidation, long-chain fatty acid catabolic process and peroxisome localization	-1.062	0	0.00576986	7.81195	0.00012889	3714	1284	1696	1348	468	822	4437	3075	4814	1372	1786	1086	320.675	168.198	238.67	146.394	105.951	96.597	600.14	376.472	548.869	170.263	202.74	199.942
B9J08_005568	HGT2	NA	NA	GAL2	mRNA Has domain(s) with predicted transmembrane transporter activity, role in transmembrane transport and integral component of membrane, membrane localization	-1.05646	0	0.000301356	10.512	2.85042e-06	11307	5504	5427	4578	1618	2963	32809	28268	41125	25788	28852	19825	976.271	720.998	763.716	497.175	366.3	348.194	4437.68	3460.85	4688.87	3200.25	3275.17	3649.96
B9J08_005554	NA	RTA2	NA	PUG1	mRNA Has domain(s) with predicted role in response to stress and integral component of membrane localization	-1.05605	0	0.000159577	5.21425	1.20724e-06	1114	691	672	425	209	387	132	219	180	148	195	111	96.185	90.518	94.567	46.155	47.316	45.478	17.854	26.812	20.523	18.367	22.136	20.436
B9J08_001698	NA	NA	NA	NA	mRNA Ortholog of C. albicans SC5314 : CR_05750W_A, C. dubliniensis CD36 : Cd36_31150, C. parapsilosis CDC317 : CPAR2_205350 and Candida tenuis NRRL Y-1498 : CANTEDRAFT_112958	-1.04196	0	9.59673e-05	7.20269	6.18e-07	5153	2763	3147	2007	896	1681	730	660	710	419	549	432	444.921	361.94	442.862	217.962	202.846	197.541	98.738	80.804	80.951	51.997	62.32	79.535
B9J08_004892	NA	HYR3	NA	FLO5	mRNA Protein of unknown function	-1.01963	0	0.0025694	6.06853	4.44695e-05	2327	2750	1923	1495	536	1069	294	220	202	122	210	103	200.918	360.237	270.615	162.358	121.345	125.623	39.766	26.935	23.031	15.14	23.838	18.963
B9J08_000211	NA	NA	NA	NA	mRNA Protein of unknown function	-1.01103	0	0.00243424	6.17649	4.06605e-05	737	383	435	297	116	248	1563	2189	2428	544	507	373	63.634	50.171	61.215	32.254	26.261	29.144	211.408	267.999	276.829	67.51	57.553	68.673
B9J08_004803	NA	NA	NA	NA	mRNA Ortholog of C. parapsilosis CDC317 : CPAR2_601190, Candida tenuis NRRL Y-1498 : CANTEDRAFT_113252, Debaryomyces hansenii CBS767 : DEHA2A06160g and Pichia stipitis Pignal : PICST_45364	-0.999717	0	0.00152284	6.34361	2.23722e-05	763	393	396	330	121	216	1023	921	1416	1384	1716	1111	65.879	51.481	55.727	35.838	27.393	25.383	138.369	112.758	161.445	171.752	194.794	204.545
B9J08_004971	NA	NA	NA	DDR48	mRNA Protein of unknown function	-0.999229	0	0.000768144	7.17651	1.00482e-05	5562	4500	3151	2426	1124	2134	400	420	281	560	704	433	480.235	589.479	443.425	263.466	254.463	250.775	54.103	51.421	32.038	69.495	79.915	79.719
B9J08_005151	NA	NA	NA	NA	mRNA Has domain(s) with predicted nucleic acid binding, nucleotide binding activity	-0.99851	0	0.00543033	4.53164	0.000117352	679	390	294	233	129	208	99	192	149	99	111	66	58.626	51.088	41.373	25.304	29.204	24.443	13.391	23.507	16.988	12.286	12.6	12.151
B9J08_000844	NA	NA	NA	NA	mRNA Has domain(s) with predicted oxidoreductase activity, role in oxidation-reduction process and mitochondrion localization	-0.982976	0	0.00300497	9.77323	5.68458e-05	42516	25128	24544	15623	8700	14612	1865	1816	1816	2332	3738	3201	3670.92	3291.65	3453.96	1696.67	1969.6	1717.12	252.256	222.333	207.051	289.398	424.323	589.333
B9J08_002977	IME2	NA	IME2	NA	mRNA Ortholog(s) have protein kinase activity, role in ascospore formation, negative regulation of DNA replication origin binding, protein phosphorylation, regulation of meiotic nuclear division and nucleus localization	-0.979954	0	0.000293015	5.47241	2.71256e-06	812	472	472	335	150	278	701	666	717	127	208	114	70.11	61.83	66.422	36.381	33.959	32.669	94.816	81.538	81.749	15.761	23.611	20.988
B9J08_001450	CFL4	NA	FRE2	NA	mRNA Ortholog(s) have ferric-chelate reductase activity, role in copper ion import, iron ion transport, nuclear-transcribed mRNA catabolic process, nonsense-mediated decay and plasma membrane localization	-0.960913	0	0.00287459	3.73003	5.26439e-05	584	277	403	214	103	234	65	88	77	26	22	14	50.424	36.286	56.712	23.241	23.318	27.498	8.792	10.774	8.779	3.227	2.497	2.578
B9J08_005198	RGS2	NA	RGS2	NA	mRNA Ortholog(s) have GTPase activator activity and role in adenylate cyclase-modulating G protein-coupled receptor signaling pathway	-0.906487	0	0.00476795	6.97619	9.72122e-05	1590	718	882	766	233	481	1811	1632	2336	1191	1333	738	137.284	94.055	124.12	83.188	52.749	56.524	244.952	199.805	266.339	147.801	151.317	135.872
B9J08_003575	NA	NA	PUN1	NA	mRNA Ortholog(s) have role in fungal-type cell wall organization and membrane raft, plasma membrane localization	-0.906336	0	5.59562e-05	6.76134	2.48e-07	1823	1196	1205	769	392	783	655	704	730	817	1053	652	157.402	156.67	169.574	83.514	88.745	92.014	88.594	86.191	83.231	101.389	119.532	120.039
B9J08_003279	NA	NA	NA	PSP1	mRNA Ortholog of C. albicans SC5314 : C7_00880C_A, C. dubliniensis CD36 : Cd36_70820, C. parapsilosis CDC317 : CPAR2_301430 and Candida tenuis NRRL Y-1498 : CANTEDRAFT_132919	-0.89692	0	0.00830042	8.66299	0.000207135	5540	2480	2809	2282	1045	1484	5757	8192	7554	3331	2795	1924	478.336	324.868	395.297	247.827	236.578	174.391	778.68	1002.95	861.27	413.372	317.278	354.226
B9J08_002976	NA	NA	YGR127W	NA	mRNA Ortholog(s) have intracellular localization	-0.885192	0	0.000465992	8.9683	5.26138e-06	7436	4378	4193	3412	1478	2527	7252	9312	8743	2538	2702	1569	642.04	573.497	590.061	370.546	334.606	296.958	980.891	1140.07	996.834	314.962	306.721	288.867
B9J08_004637	NA	NA	NA	NA	mRNA Protein of unknown function	-0.875005	0	0.000118873	8.01229	8.37e-07	8185	4388	4283	3253	1508	2985	1574	1421	1848	748	889	627	706.711	574.807	602.726	353.279	341.397	350.78	212.896	173.973	210.7	92.826	100.916	115.436
B9J08_004536	NA	orf19.3701	NA	NA	mRNA Protein of unknown function	-0.87251	0	0.000328742	7.24874	3.17561e-06	4024	2613	2477	1860	819	1639	804	893	775	537	697	499	347.441	342.291	348.576	201.998	185.414	192.606	108.747	109.33	88.362	66.641	79.121	91.87
B9J08_002168	MAL31	NA	MAL31	NA	mRNA Has domain(s) with predicted transmembrane transporter activity, role in transmembrane transport and integral component of membrane, membrane localization	-0.864113	0	0.00543033	6.33569	0.000118895	1204	810	769	780	190	449	843	680	990	512	600	389	103.956	106.106	108.218	84.709	43.014	52.764	114.023	83.252	112.875	63.538	68.11	71.618
B9J08_002499	NA	orf19.2671	NA	NA	mRNA Has domain(s) with predicted oxidoreductase activity and role in oxidation-reduction process	-0.861823	0	0.00476795	5.44073	9.88325e-05	2189	1061	1154	993	394	671	135	132	107	95	124	123	189.003	138.986	162.397	107.841	89.198	78.852	18.26	16.161	12.2	11.789	14.076	22.645
B9J08_002624	NA	NA	NA	NA	mRNA Protein of unknown function	-0.858302	0	0.00295919	8.88553	5.53844e-05	6876	3313	3195	3184	1047	2146	7918	8587	9439	3027	2982	1840	593.689	433.987	449.617	345.785	237.031	252.185	1070.97	1051.31	1076.19	375.646	338.505	338.76
B9J08_001545	NA	NA	NA	NA	mRNA Has domain(s) with predicted metal ion binding activity	-0.857999	0	0.00151432	7.94583	2.16375e-05	1636	753	855	579	314	587	3443	3796	4902	7131	8098	5362	141.256	98.639	120.32	62.88	71.087	68.981	465.693	464.744	558.902	884.947	919.253	987.192
B9J08_000457	NA	NA	YMR295C	NA	mRNA Ortholog of S. cerevisiae : YMR295C, C. albicans SC5314 : C4_06470W_A, C. glabrata CBS138 : CAGL0M13629g, C. dubliniensis CD36 : Cd36_45960 and C. parapsilosis CDC317 : CPAR2_501070	-0.853245	0	0.00843584	9.53494	0.000212212	26788	12581	12580	9727	5084	8491	3187	4969	4013	2414	2422	1862	2312.93	1648.05	1770.32	1056.36	1150.97	997.813	431.067	608.354	457.543	299.574	274.936	342.811
B9J08_000581	NA	NA	NA	NA	mRNA Has domain(s) with predicted flavin adenine dinucleotide binding, oxidoreductase activity, acting on CH-OH group of donors activity and role in oxidation-reduction process	-0.828015	0	0.00124059	8.49938	1.7227e-05	6893	3567	3486	3330	1240	2179	2995	2773	3351	2410	2687	1608	595.157	467.26	490.568	361.641	280.725	256.063	405.098	339.498	382.065	299.078	305.018	296.047
B9J08_005055	NA	NA	RSA1	NA	mRNA Ortholog(s) have role in box C/D snoRNP assembly, ribosomal large subunit assembly and nucleoplasm localization	-0.809848	0	0.00648469	4.12844	0.000148773	400	220	200	162	69	169	82	90	119	120	130	76	34.537	28.819	28.145	17.593	15.621	19.86	11.091	11.019	13.568	14.892	14.757	13.992
B9J08_004866	NA	NA	CAB1	NA	mRNA Ortholog(s) have pantothenate kinase activity, role in coenzyme A biosynthetic process, ergosterol metabolic process, regulation of response to drug and cytoplasm, nucleus localization	-0.774509	0	0.00231177	6.90258	3.67539e-05	3352	1927	1722	1418	718	1294	482	682	604	571	620	368	289.419	252.428	242.329	153.996	162.549	152.063	65.194	83.497	68.865	70.86	70.38	67.752
B9J08_004261	NA	NA	YLR149C	NA	mRNA Ortholog of S. cerevisiae : YLR149C, C. albicans SC5314 : C7_03280C_A, C. glabrata CBS138 : CAGL0K10824g, C. dubliniensis CD36 : Cd36_72930 and C. parapsilosis CDC317 : CPAR2_704080	-0.730675	0	0.00505723	7.98458	0.000107882	1918	974	1211	1023	382	735	4895	5253	5434	3726	3597	2532	165.604	127.589	170.418	111.099	86.481	86.373	662.088	643.124	619.558	462.391	408.317	466.164
B9J08_000899	NA	NA	FIS1	NA	mRNA Ortholog(s) have role in mitochondrial fission, peroxisome fission, peroxisome organization and mitochondrial outer membrane, peroxisome localization	-0.727165	0	0.00575365	5.0685	0.00012737	843	467	480	350	182	391	209	150	192	126	187	132	72.786	61.175	67.548	38.01	41.203	45.948	28.269	18.364	21.891	15.636	21.228	24.302
B9J08_003830	NA	PTR22	NA	PTR2	mRNA Has domain(s) with predicted transmembrane transporter activity, role in transmembrane transport and membrane localization	-0.724467	0	0.00365811	8.08175	7.20384e-05	2342	1637	1481	1299	525	1077	2973	4323	4113	3623	3728	2324	202.213	214.439	208.414	141.073	118.855	126.563	402.122	529.264	468.944	449.609	423.188	427.869
B9J08_004148	OP4	NA	NA	NA	mRNA Ortholog of C. albicans SC5314 : C1_13080W_A/OP4, C. dubliniensis CD36 : Cd36_12150, C. parapsilosis CDC317 : CPAR2_801850 and Candida tenuis NRRL Y-1498 : cten_CGOB_00178	-0.695508	0	0.00092393	8.0924	1.26438e-05	2147	1467	1224	1087	531	934	3337	2651	4021	5168	5750	3441	185.377	192.17	172.248	118.049	120.214	109.758	451.356	324.561	458.455	641.341	652.718	633.519
B9J08_002560	RBR2	NA	TIP1	NA	mRNA Ortholog(s) have lipase activity, structural constituent of cell wall activity, role in fungal-type cell wall organization and fungal-type cell wall localization	-0.693336	0	0.000559636	7.1034	6.75753e-06	1612	1177	1063	842	400	831	1101	897	1378	1445	1726	1053	139.184	154.181	149.591	91.442	90.556	97.654	148.919	109.82	157.113	179.322	195.929	193.867
B9J08_000112	PEX19	NA	PEX19	NA	mRNA Ortholog(s) have peroxisome membrane targeting sequence binding activity	-0.669462	0	0.00761345	6.88416	0.000185008	1454	1005	1073	939	428	582	982	814	984	1079	1307	800	125.542	131.65	150.998	101.976	96.895	68.393	132.823	99.658	112.191	133.902	148.366	147.287
B9J08_000059	PEX22	NA	NA	NA	mRNA Ortholog of C. albicans SC5314 : C2_06690C_A/PEX22, C. dubliniensis CD36 : Cd36_20990, C. parapsilosis CDC317 : CPAR2_104440 and Candida tenuis NRRL Y-1498 : CANTEDRAFT_113444	-0.654849	0	0.00353455	7.47337	6.75755e-05	4009	2191	1993	1824	907	1605	1067	1025	1479	885	1080	610	346.146	287.011	280.465	198.088	205.336	188.61	144.32	125.491	168.628	109.827	122.597	112.306
B9J08_004366	NA	NA	NA	NA	mRNA Protein of unknown function	-0.647292	0	0.00621993	9.82816	0.000141447	26602	21116	18916	15765	7897	13069	3895	3037	4272	2270	3136	2270	2296.87	2766.1	2661.96	1712.09	1787.81	1535.79	526.83	371.819	487.073	281.704	355.987	417.927
B9J08_003185	NA	NA	TES1	NA	mRNA Ortholog(s) have acyl-CoA hydrolase activity, role in fatty acid beta-oxidation, fatty acid oxidation and peroxisome localization	-0.643909	0	0.00738498	6.08876	0.000175373	1220	741	743	736	292	482	447	359	492	429	559	329	105.337	97.067	104.559	79.93	66.106	56.642	60.46	43.952	56.095	53.238	63.456	60.572
B9J08_000707	NA	NA	DLT1	NA	mRNA Ortholog of S. cerevisiae : DLT1, C. albicans SC5314 : C1_03910C_A, C. glabrata CBS138 : CAGL0K03751g, C. dubliniensis CD36 : Cd36_03640 and C. parapsilosis CDC317 : CPAR2_106880	-0.640252	0	0.00752832	5.98868	0.000180292	1317	833	822	669	387	565	328	324	303	339	479	273	113.713	109.119	115.676	72.654	87.613	66.396	44.365	39.667	34.547	42.069	54.374	50.262
B9J08_002401	SSO2	NA	SSO2	NA	mRNA Ortholog(s) have SNAP receptor activity, phosphatidic acid binding activity and role in ascospore formation, ascospore-type prospore assembly, ascospore-type prospore membrane formation	-0.637481	0	0.00189096	8.30544	2.85414e-05	9458	5495	5183	4634	2376	3822	1166	1065	1244	1483	1600	1071	816.624	719.819	729.379	503.257	537.904	449.139	157.711	130.388	141.835	184.038	181.626	197.181
B9J08_000874	OSM1	NA	NA	OSM1	mRNA Has domain(s) with predicted succinate dehydrogenase activity and role in oxidation-reduction process	-0.632966	0	0.00892035	8.96523	0.000227838	5674	3944	3600	3088	1493	2763	5544	7956	7308	3821	3860	2208	489.905	516.645	506.611	335.36	338.001	324.692	749.87	974.052	833.223	474.181	438.172	406.512
B9J08_005271	NA	NA	CTI6	NA	mRNA Ortholog(s) have methylated histone binding, transcription factor binding activity	-0.625537	0	0.00262829	5.93643	4.65466e-05	1226	901	849	674	301	725	343	255	367	324	348	244	105.856	118.027	119.476	73.197	68.144	85.198	46.394	31.22	41.844	40.208	39.504	44.923
B9J08_001659	NA	NA	NA	NA	mRNA Ortholog of C. albicans SC5314 : CR_09460C_A, C. parapsilosis CDC317 : CPAR2_201020, Candida tenuis NRRL Y-1498 : CANTEDRAFT_112678 and Debaryomyces hansenii CBS767 : DEHA2E02618g	-0.594645	0	0.00655072	7.839	0.000151607	2532	1625	1673	1601	577	1258	3294	2740	4298	1557	1736	1095	218.618	212.867	235.433	173.87	130.627	147.833	445.54	335.458	490.037	193.221	197.064	201.599
Upregulated genes relative to Smooth on glucose
gene	C. albicans ortholog	C. albicans best hit	S. cerevisiae ortholog	S. cerevisiae best hit	product	wrinkled glucose	smooth glucose	FDR	AveExpr	P value	S1_Glu	S2_Glu	S3_Glu	W1_Glu	W2_Glu	W3_Glu	S1_Lac	S2_Lac	S3_Lac	W1_Lac	W2_Lac	W3_Lac	S1_Glu CPM	S2_Glu CPM	S3_Glu CPM	W1_Glu CPM	W2_Glu CPM	W3_Glu CPM	S1_Lac CPM	S2_Lac CPM	S3_Lac CPM	W1_Lac CPM	W2_Lac CPM	W3_Lac CPM
B9J08_004667	NA	NA	NA	NA	mRNA Ortholog of C. albicans SC5314 : C1_03660W_A, C. parapsilosis CDC317 : CPAR2_108915, Candida tenuis NRRL Y-1498 : CANTEDRAFT_102387 and Debaryomyces hansenii CBS767 : DEHA2B06776g	0.588714	0	0.00393705	6.86551	7.92323e-05	1112	935	968	1762	756	1502	535	478	617	960	1218	750	96.012	122.481	136.222	191.355	171.151	176.506	72.363	58.521	70.347	119.135	138.263	138.082
B9J08_004572	PRC3	NA	YBR139W	NA	mRNA Ortholog(s) have serine-type carboxypeptidase activity, role in macroautophagy, phytochelatin biosynthetic process, zymogen activation and fungal-type vacuole lumen localization	0.600568	0	0.00365811	7.38965	7.07603e-05	2143	1402	1132	2502	1151	2431	817	661	941	1255	1398	1029	185.031	183.655	159.301	271.72	260.576	285.677	110.506	80.926	107.288	155.744	158.696	189.448
B9J08_000414	ZCF1	NA	NA	NA	mRNA Has domain(s) with predicted DNA-binding transcription factor activity, RNA polymerase II-specific, zinc ion binding activity, role in regulation of transcription, DNA-templated and host cell nucleus, nucleus localization	0.617003	0	0.00243424	7.07787	4.05406e-05	1804	1105	1061	2357	1080	1774	685	679	731	837	984	610	155.761	144.75	149.309	255.972	244.502	208.47	92.652	83.13	83.345	103.87	111.7	112.306
B9J08_001932	ASR1	NA	NA	NA	mRNA Ortholog of C. albicans SC5314 : C1_10740C_A/ASR1, C. dubliniensis CD36 : Cd36_10070, C. parapsilosis CDC317 : CPAR2_201810 and Candida tenuis NRRL Y-1498 : CANTEDRAFT_95453	0.631792	0	0.00543033	7.84011	0.00011912	1264	1041	799	1717	872	1546	2355	1580	2426	3726	4229	2678	109.137	136.366	112.439	186.468	197.413	181.677	318.533	193.439	276.601	462.391	480.06	493.044
B9J08_000157	NA	NA	NA	NA	mRNA Ortholog of C. albicans SC5314 : C2_01750C_A, C. dubliniensis CD36 : Cd36_16610, C. parapsilosis CDC317 : CPAR2_210310 and Candida tenuis NRRL Y-1498 : CANTEDRAFT_116868	0.635724	0	0.00128909	7.89939	1.81599e-05	3380	1965	1812	3994	1754	3801	1449	1272	1579	1249	1394	935	291.837	257.406	254.994	433.752	397.089	446.671	195.989	155.731	180.03	154.999	158.241	172.142
B9J08_002372	NA	NA	NA	NA	mRNA Ortholog of C. albicans SC5314 : C6_01360W_A, C. dubliniensis CD36 : Cd36_61470, C. parapsilosis CDC317 : CPAR2_602680, Candida tropicalis MYA-3404 : CTRG_02829 and Candida albicans WO-1 : CAWG_05229	0.644242	0	0.00934926	6.03591	0.000244597	843	848	619	1288	589	1294	244	266	276	387	445	208	72.786	111.084	87.109	139.878	133.344	152.063	33.003	32.566	31.468	48.026	50.515	38.295
B9J08_004839	PST3	NA	PST2	NA	mRNA Ortholog(s) have extracellular region, intracellular, mating-type region heterochromatin, membrane raft localization	0.674943	0	0.00917316	7.98574	0.000238144	1860	1461	1342	3019	1327	2184	1498	975	1139	3938	4951	3009	160.596	191.384	188.853	327.866	300.421	256.651	202.617	119.369	129.863	488.7	562.018	553.984
B9J08_002035	NA	NA	NA	YLR326W	mRNA Ortholog of C. albicans SC5314 : C1_03150C_A, C. dubliniensis CD36 : Cd36_02950, C. parapsilosis CDC317 : CPAR2_108520 and Candida tenuis NRRL Y-1498 : CANTEDRAFT_100285	0.71173	0	0.00476795	5.66852	9.81966e-05	506	396	284	768	296	637	247	231	353	479	566	291	43.689	51.874	39.966	83.406	67.012	74.857	33.409	28.281	40.247	59.443	64.25	53.576
B9J08_002043	ARO1	NA	ARO1	NA	mRNA Ortholog(s) have 3-dehydroquinate dehydratase activity, 3-dehydroquinate synthase activity, 3-phosphoshikimate 1-carboxyvinyltransferase activity, shikimate 3-dehydrogenase (NADP+) activity, shikimate kinase activity	0.711981	0	0.000351706	7.07758	3.60978e-06	1200	943	860	1639	909	1697	731	741	965	1102	1345	854	103.611	123.529	121.024	177.997	205.789	199.422	98.874	90.72	110.025	136.757	152.679	157.229
B9J08_001317	NA	NA	NA	NA	mRNA Ortholog of Candida tenuis NRRL Y-1498 : CANTEDRAFT_116538, Debaryomyces hansenii CBS767 : DEHA2D11440g and Candida guilliermondii ATCC 6260 : PGUG_04539	0.716532	0	0.00243424	7.11545	3.98929e-05	2449	1823	1824	3420	1647	3777	713	519	630	358	435	354	211.452	238.804	256.683	371.415	372.866	443.851	96.439	63.541	71.83	44.427	49.38	65.175
B9J08_000799	NA	NA	NA	NA	mRNA Ortholog of C. albicans SC5314 : CR_06140W_A, C. dubliniensis CD36 : Cd36_31660, C. parapsilosis CDC317 : CPAR2_204970 and Candida tenuis NRRL Y-1498 : CANTEDRAFT_104266	0.73722	0	0.000629029	8.1504	7.84862e-06	3615	2136	1867	4307	2072	4418	1530	1680	2002	1812	1811	1277	312.127	279.806	262.734	467.744	469.082	519.178	206.945	205.682	228.258	224.867	205.578	235.107
B9J08_002652	CIT1	NA	CIT1	NA	mRNA Ortholog(s) have citrate (Si)-synthase activity, role in acetyl-CoA catabolic process, citrate metabolic process, tricarboxylic acid cycle and mitochondrion localization	0.739342	0	0.00379686	8.60173	7.56469e-05	2526	2449	1871	4048	1670	4681	3057	2680	3901	4113	4259	2554	218.1	320.807	263.297	439.617	378.073	550.084	413.484	328.112	444.773	510.417	483.465	470.214
B9J08_000594	NA	NA	NA	NA	mRNA Has domain(s) with predicted phosphatidylinositol binding activity and role in cell communication	0.75882	0	0.000233305	6.6221	2.01894e-06	620	497	430	951	414	943	632	562	705	1530	1772	1100	53.532	65.105	60.512	103.279	93.726	110.816	85.483	68.806	80.381	189.871	201.151	202.52
B9J08_002342	NDE1	NA	NDE1	NA	mRNA Ortholog(s) have NADH dehydrogenase activity, role in NADH oxidation, glycolytic fermentation to ethanol, regulation of apoptotic process and mitochondrial membrane, mitochondrion localization	0.782435	0	0.0025086	8.46662	4.24074e-05	2677	2762	2501	4819	2252	5100	1955	1558	2335	2717	3761	2288	231.138	361.809	351.954	523.348	509.832	599.322	264.429	190.746	266.225	337.176	426.934	421.241
B9J08_003454	ADAEC	NA	NA	NA	mRNA Has domain(s) with predicted DNA binding, methyltransferase activity, zinc ion binding activity and role in DNA repair, regulation of transcription, DNA-templated	0.791329	0	0.000682662	8.75071	8.74684e-06	2409	1901	1737	3605	1734	3885	3982	4747	5966	4401	4888	3859	207.998	249.022	244.44	391.506	392.562	456.543	538.597	581.174	680.214	546.158	554.867	710.476
B9J08_005429	NRG1	NA	NRG2	NA	mRNA Ortholog(s) have sequence-specific DNA binding activity	0.797156	0	0.00738498	6.19961	0.000175228	411	308	361	731	352	548	585	803	708	880	1044	554	35.487	40.347	50.802	79.387	79.69	64.398	79.126	98.311	80.723	109.207	118.511	101.996
B9J08_003614	ADH2	NA	ADH1	NA	mRNA Ortholog(s) have alcohol dehydrogenase (NAD+) activity, melatonin binding, methylglyoxal reductase (NADH-dependent) activity	0.807764	0	0.007628	6.14997	0.000187284	571	411	315	793	376	790	367	331	483	706	1147	872	49.301	53.839	44.328	86.121	85.123	92.836	49.64	40.524	55.069	87.614	130.203	160.543
B9J08_002232	ATM1	NA	ATM1	NA	mRNA Ortholog(s) have ATPase-coupled transmembrane transporter activity, role in iron import into the mitochondrion, iron-sulfur cluster assembly and mitochondrial inner membrane, mitochondrion localization	0.812443	0	0.000270937	6.91663	2.45364e-06	1414	933	875	2055	1001	1799	542	621	652	945	922	522	122.088	122.219	123.135	223.175	226.617	211.408	73.31	76.029	74.338	117.273	104.662	96.105
B9J08_000350	NA	NA	NA	NA	mRNA Has domain(s) with predicted oxidoreductase activity	0.833404	0	0.00761345	5.20855	0.000185395	173	149	153	261	146	333	315	240	379	595	702	473	14.937	19.518	21.531	28.345	33.053	39.132	42.606	29.383	43.212	73.839	79.688	87.084
B9J08_000169	NA	NA	SRX1	NA	mRNA Ortholog(s) have sulfiredoxin activity and role in cellular protein localization, cellular response to oxidative stress	0.847592	0	0.00092393	7.32546	1.23957e-05	1678	1591	1405	2713	1471	3222	433	528	556	1238	1749	964	144.882	208.413	197.719	294.634	333.021	378.631	58.567	64.643	63.392	153.634	198.54	177.481
B9J08_004825	NA	NA	PIC2	NA	mRNA Ortholog(s) have copper ion transmembrane transporter activity, inorganic phosphate transmembrane transporter activity and role in cellular copper ion homeostasis, copper ion transmembrane transport, phosphate ion transmembrane transport	0.901421	0	0.000179612	5.87296	1.40972e-06	726	691	465	1229	588	1232	228	204	260	342	378	221	62.684	90.518	65.437	133.471	133.118	144.777	30.839	24.976	29.644	42.442	42.909	40.688
B9J08_002825	NA	NA	NA	NA	mRNA Ortholog of Candida tenuis NRRL Y-1498 : CANTEDRAFT_115096	0.912405	0	0.00233332	10.5282	3.7566e-05	9289	6021	6653	16225	7638	11767	4891	4644	3564	47190	57879	39785	802.032	788.722	936.245	1762.05	1729.17	1382.79	661.547	568.564	406.35	5856.21	6570.2	7324.77
B9J08_000144	NA	NA	YPL113C	NA	mRNA Ortholog(s) have oxidoreductase activity, acting on the CH-OH group of donors, NAD or NADP as acceptor activity	0.916702	0	5.79592e-05	6.91509	2.74e-07	1274	835	833	1894	1020	1829	432	419	605	1064	1269	909	110	109.381	117.224	205.69	230.919	214.933	58.431	51.298	68.979	132.041	144.052	167.355
B9J08_005080	NA	NA	NA	NA	mRNA Ortholog of Candida tenuis NRRL Y-1498 : CANTEDRAFT_113685, Debaryomyces hansenii CBS767 : DEHA2D03938g and Candida lusitaniae ATCC 42720 : CLUG_02430	0.930816	0	9.59673e-05	8.80273	6.02e-07	4448	3030	2539	7265	3548	5421	1755	1418	1781	5365	6552	3742	384.05	396.916	357.301	788.986	803.234	637.044	237.378	173.605	203.061	665.789	743.758	688.935
B9J08_000528	SOD2	NA	SOD2	NA	mRNA Ortholog(s) have manganese ion binding, superoxide dismutase activity	0.955774	0	0.000146278	10.1509	1.05977e-06	8733	7515	5743	14200	6738	17041	7281	6146	8151	9398	12194	8059	754.026	984.429	808.185	1542.13	1525.42	2002.56	984.814	752.454	929.337	1166.28	1384.21	1483.73
B9J08_003864	NA	NA	TAD2	NA	mRNA Ortholog(s) have tRNA-specific adenosine deaminase activity and role in tRNA modification	0.963076	0	0.00151908	4.12033	2.20112e-05	161	118	102	280	113	257	121	90	107	147	156	77	13.901	15.457	14.354	30.408	25.582	30.201	16.366	11.019	12.2	18.242	17.709	14.176
B9J08_004101	NA	NA	NA	NA	mRNA Protein of unknown function	0.989097	0	0.00287569	3.66656	5.32428e-05	257	214	229	551	195	490	46	20	65	22	25	32	22.19	28.033	32.226	59.839	44.146	57.582	6.222	2.449	7.411	2.73	2.838	5.891
B9J08_000901	NA	PDC11	NA	PDC1	mRNA Has domain(s) with predicted catalytic activity, magnesium ion binding, thiamine pyrophosphate binding activity	0.99696	0	0.000159577	7.65454	1.22035e-06	2380	2201	1880	4679	2129	4627	737	520	735	1343	1528	754	205.494	288.321	264.563	508.144	481.986	543.738	99.685	63.664	83.801	166.664	173.453	138.818
B9J08_000871	LAP3	NA	LAP3	NA	mRNA Ortholog(s) have RNA polymerase II cis-regulatory region sequence-specific DNA binding, cysteine-type peptidase activity, double-stranded DNA binding, mRNA binding, single-stranded DNA binding activity	1.00865	0	3.74115e-05	6.72858	1.43e-07	1346	954	924	2231	1091	2340	333	226	333	807	1089	598	116.217	124.969	130.03	242.289	246.992	274.983	45.041	27.669	37.967	100.148	123.619	110.097
B9J08_002993	KIN3	NA	KIN3	NA	mRNA Ortholog(s) have protein kinase activity, protein serine/threonine kinase activity	1.02636	0	0.00280184	5.0004	5.02099e-05	196	241	171	486	188	399	196	148	260	309	388	188	16.923	31.57	24.064	52.78	42.561	46.888	26.511	18.12	29.644	38.346	44.044	34.612
B9J08_002974	NA	NA	NA	TNA1	mRNA Ortholog(s) have biotin transmembrane transporter activity, dethiobiotin transmembrane transporter activity, solute:proton symporter activity and role in biotin import across plasma membrane, dethiobiotin import across plasma membrane	1.05227	0	7.49464e-05	5.8554	4.22e-07	1141	903	742	1983	886	2278	197	150	156	170	175	147	98.516	118.289	104.418	215.356	200.582	267.697	26.646	18.364	17.786	21.097	19.865	27.064
B9J08_002479	NA	NA	ZTA1	NA	mRNA Ortholog(s) have 2-alkenal reductase [NAD(P)+] activity, NADPH:quinone reductase activity, mRNA 3'-UTR AU-rich region binding activity and role in cellular response to oxidative stress	1.0772	0	0.00224667	4.65169	3.48425e-05	174	193	149	355	198	382	166	113	146	162	244	188	15.024	25.282	20.968	38.553	44.825	44.89	22.453	13.835	16.646	20.104	27.698	34.612
B9J08_005329	YIM1	NA	YIM1	NA	mRNA Ortholog(s) have role in cellular response to DNA damage stimulus and lipid droplet localization	1.07968	0	0.000204359	6.2089	1.6862e-06	667	689	538	1294	622	1668	261	250	302	549	686	478	57.59	90.256	75.71	140.53	140.815	196.014	35.302	30.607	34.433	68.13	77.872	88.004
B9J08_003020	NA	orf19.4780	NA	YJR124C	mRNA Has domain(s) with predicted transmembrane transporter activity, role in transmembrane transport and integral component of membrane localization	1.08481	0	0.000465992	6.46322	5.34546e-06	812	816	611	1525	845	1755	352	418	338	790	687	396	70.11	106.892	85.983	165.616	191.3	206.237	47.611	51.176	38.537	98.038	77.986	72.907
B9J08_004113	NA	MDR1	NA	YHK8	mRNA Has domain(s) with predicted transmembrane transporter activity, role in transmembrane transport and integral component of membrane localization	1.0903	0	0.00365811	3.57157	7.21463e-05	108	73	72	187	105	176	61	94	69	103	81	51	9.325	9.563	10.132	20.308	23.771	20.682	8.251	11.508	7.867	12.782	9.195	9.39
B9J08_000248	NA	NA	RIO1	NA	mRNA Ortholog(s) have protein kinase activity	1.09525	0	0.00092393	3.86716	1.25669e-05	127	120	95	216	148	271	64	59	68	112	132	82	10.965	15.719	13.369	23.458	33.506	31.846	8.657	7.223	7.753	13.899	14.984	15.097
B9J08_000447	CRZ2	NA	NA	CRZ1	mRNA Has domain(s) with predicted DNA binding, nucleic acid binding, zinc ion binding activity and role in DNA repair	1.1177	0	6.80161e-05	6.74097	3.56e-07	784	523	478	1410	751	1137	633	698	629	1393	1339	808	67.692	68.511	67.267	153.127	170.019	133.614	85.618	85.456	71.716	172.869	151.998	148.76
B9J08_004089	RFG1	NA	ROX1	NA	mRNA Ortholog(s) have DNA binding, bending, DNA-binding transcription repressor activity, RNA polymerase II-specific, cis-regulatory region sequence-specific DNA binding, sequence-specific DNA binding, transcription corepressor activity	1.1426	0	0.000112289	5.52728	7.68e-07	225	172	168	451	195	449	311	252	391	758	1009	670	19.427	22.531	23.642	48.979	44.146	52.764	42.065	30.852	44.58	94.067	114.538	123.353
B9J08_000266	NA	NA	NA	NA	mRNA Protein of unknown function	1.15521	0	0.00162427	5.5803	2.41892e-05	162	207	137	432	220	309	170	198	172	2099	2505	1520	13.987	27.116	19.279	46.916	49.806	36.312	22.994	24.241	19.611	260.483	284.358	279.846
B9J08_004788	NA	NA	NA	NA	mRNA Ortholog of C. albicans SC5314 : C2_08910C_A, C. dubliniensis CD36 : Cd36_23080, Candida tenuis NRRL Y-1498 : CANTEDRAFT_131682 and Debaryomyces hansenii CBS767 : DEHA2B13530g	1.25454	0	0.000233462	6.55853	2.06728e-06	871	627	590	1762	883	1662	556	818	515	617	553	325	75.204	82.134	83.028	191.355	199.903	195.309	75.203	100.148	58.718	76.569	62.774	59.835
B9J08_004987	NA	NA	NA	NA	mRNA Ortholog of C. albicans SC5314 : C1_01510W_B, C. dubliniensis CD36 : Cd36_01380, C. parapsilosis CDC317 : CPAR2_109270 and Candida tenuis NRRL Y-1498 : CANTEDRAFT_93810	1.25458	0	0.000108105	5.05696	7.18e-07	350	204	224	833	302	511	111	128	117	321	361	202	30.22	26.723	31.522	90.465	68.37	60.05	15.014	15.671	13.34	39.836	40.979	37.19
B9J08_000592	UME6	NA	NA	UME6	mRNA Has domain(s) with predicted DNA-binding transcription factor activity, RNA polymerase II-specific, zinc ion binding activity, role in regulation of transcription, DNA-templated and host cell nucleus, nucleus localization	1.32073	0	2.71383e-06	7.38705	4.92e-09	568	526	420	1456	595	1303	1491	1445	1651	3984	4053	2625	49.042	68.903	59.105	158.123	134.703	153.121	201.67	176.911	188.239	494.409	460.081	483.286
B9J08_004272	NA	NA	NA	NA	mRNA Ortholog of C. albicans SC5314 : C2_03490C_A, C. dubliniensis CD36 : Cd36_18230, Debaryomyces hansenii CBS767 : DEHA2E20636g and Pichia stipitis Pignal : PICST_66811	1.32989	0	5.06433e-06	6.70796	1.32e-08	1239	872	855	2579	1361	2470	370	479	378	512	638	428	106.978	114.228	120.32	280.082	308.118	290.26	50.045	58.644	43.098	63.538	72.423	78.799
B9J08_002962	NA	LAP3	NA	LAP3	mRNA Has domain(s) with predicted cysteine-type endopeptidase activity and role in proteolysis	1.33791	0	1.33922e-06	8.22903	2.16e-09	2355	1855	1611	5210	2639	4876	1907	1494	1749	2061	2749	1770	203.336	242.996	226.708	565.811	597.445	572.999	257.937	182.91	199.412	255.767	312.056	325.873
B9J08_001328	NA	NA	NA	NA	mRNA Has domain(s) with predicted nucleic acid binding, nucleotide binding, peptidyl-prolyl cis-trans isomerase activity and role in protein folding, protein peptidyl-prolyl isomerization	1.34531	0	0.000405054	2.92746	4.32036e-06	121	80	74	237	120	251	25	19	9	52	43	29	10.447	10.48	10.414	25.738	27.167	29.496	3.381	2.326	1.026	6.453	4.881	5.339
B9J08_002332	NA	orf19.1964	NA	NA	mRNA Protein of unknown function	1.34593	0	0.00280184	2.89127	5.07477e-05	69	77	69	168	80	230	29	42	29	44	28	22	5.958	10.087	9.71	18.245	18.111	27.028	3.922	5.142	3.306	5.46	3.178	4.05
B9J08_000502	NA	NA	NA	NA	mRNA Protein of unknown function	1.46516	0	1.40469e-05	4.22803	4.24e-08	346	194	184	848	280	643	44	46	56	93	82	48	29.874	25.413	25.893	92.094	63.389	75.562	5.951	5.632	6.385	11.541	9.308	8.837
B9J08_002529	BRG1	NA	NA	GAT2	mRNA Has domain(s) with predicted DNA-binding transcription factor activity, sequence-specific DNA binding, zinc ion binding activity and role in regulation of transcription, DNA-templated	1.50894	0	7.49464e-05	4.274	4.09e-07	88	82	84	254	117	255	73	53	73	473	493	383	7.598	10.742	11.821	27.585	26.488	29.966	9.874	6.489	8.323	58.699	55.963	70.514
B9J08_000389	NA	NA	NA	NA	mRNA Has domain(s) with predicted catalytic activity	1.55437	0	9.14e-07	7.24683	1.29e-09	682	617	502	1823	1004	1717	644	633	634	3962	4195	2332	58.885	80.824	70.644	197.98	227.296	201.772	87.106	77.498	72.286	491.679	476.2	429.342
B9J08_003179	NA	NA	XBP1	NA	mRNA Ortholog(s) have DNA-binding transcription factor activity, DNA-binding transcription factor activity, RNA polymerase II-specific activity	1.55961	0	0.000682662	5.32972	8.79259e-06	213	111	81	564	194	289	349	261	437	692	836	556	18.391	14.54	11.399	61.251	43.92	33.962	47.205	31.954	49.825	85.876	94.899	102.365
B9J08_004100	NA	HYR3	NA	NA	mRNA Protein of unknown function	1.70373	0	0.000554012	8.79153	6.46664e-06	339	506	475	1751	788	1133	18880	9578	18805	17045	21854	15691	29.27	66.284	66.844	190.16	178.396	133.144	2553.67	1172.63	2144.05	2115.26	2480.78	2888.85
B9J08_000004	NA	ZRT1	NA	NA	mRNA Protein of unknown function	1.77862	0	6.80161e-05	9.85539	3.43e-07	6179	3949	3463	23196	7559	11510	3427	1720	3624	16704	21389	13606	533.508	517.3	487.331	2519.11	1711.29	1352.59	463.529	210.579	413.191	2072.94	2428	2504.99
B9J08_004946	HGC1	NA	CLN2	NA	mRNA Ortholog(s) have cyclin-dependent protein serine/threonine kinase regulator activity	2.01083	0	3.68138e-06	6.82005	7.51e-09	123	120	139	479	261	584	1930	1803	2481	5296	6180	4468	10.62	15.719	19.561	52.02	59.088	68.628	261.048	220.741	282.872	657.226	701.53	822.599
B9J08_001489	PHO113	NA	PHO11	NA	mRNA Ortholog(s) have acid phosphatase activity, phosphatase activity, thiamine phosphate phosphatase activity, role in thiamine biosynthetic process and extracellular region localization	2.03468	0	3.77e-07	3.91944	3.88e-10	168	120	113	656	261	531	31	41	65	77	94	48	14.505	15.719	15.902	71.242	59.088	62.4	4.193	5.02	7.411	9.556	10.671	8.837
B9J08_000003	NA	ZRT1	NA	ZRT2	mRNA Has domain(s) with predicted metal ion transmembrane transporter activity, role in metal ion transport, transmembrane transport and membrane localization	2.27671	0	4.88857e-06	8.05083	1.18e-08	1152	1019	883	5913	2135	5490	908	477	1318	4531	6364	4522	99.466	133.484	124.26	642.157	483.344	645.153	122.814	58.399	150.272	562.291	722.417	832.54
B9J08_004451	NA	IFF4	NA	YIL169C	mRNA Protein of unknown function	2.4016	0	3.77e-07	11.3499	4.55e-10	6151	7790	7047	39431	17476	43276	21497	15031	21021	44370	45080	32431	531.091	1020.45	991.691	4282.24	3956.41	5085.54	2907.64	1840.24	2396.71	5506.25	5117.31	5970.84
B9J08_004787	NA	NA	CMR3	NA	mRNA Ortholog(s) have DNA binding activity	2.56396	0	0.000351034	6.20261	3.53224e-06	148	100	232	919	510	833	313	924	417	2219	2229	1391	12.779	13.1	32.648	99.804	115.459	97.889	42.336	113.125	47.544	275.375	253.027	256.095
B9J08_003657	ZRT2	NA	ZRT2	NA	mRNA Ortholog(s) have high-affinity zinc transmembrane transporter activity, low-affinity zinc ion transmembrane transporter activity and role in zinc ion import across plasma membrane	3.056	0	2.6e-10	7.62436	5.24e-14	1718	1735	1562	13741	7213	15886	450	422	501	687	722	444	148.336	227.277	219.813	1492.29	1632.96	1866.83	60.866	51.665	57.122	85.256	81.959	81.744
B9J08_001369	NA	NA	NA	NA	mRNA Ortholog of C. parapsilosis CDC317 : CPAR2_700920, Debaryomyces hansenii CBS767 : DEHA2A03564g, Pichia stipitis Pignal : PICST_43699 and Candida guilliermondii ATCC 6260 : PGUG_00227	3.60223	0	1.75e-08	4.4744	1.14e-11	224	166	113	1899	981	2470	46	42	60	34	103	77	19.341	21.745	15.902	206.233	222.089	290.26	6.222	5.142	6.841	4.219	11.692	14.176
B9J08_003343	NA	NA	NA	NA	mRNA Ortholog of C. albicans SC5314 : C2_00860C_A, C. dubliniensis CD36 : Cd36_15800, Debaryomyces hansenii CBS767 : DEHA2F00660g and Pichia stipitis Pignal : PICST_29338	3.79789	0	1.75e-08	3.52944	1.41e-11	50	51	56	703	424	729	11	12	24	114	176	109	4.317	6.681	7.881	76.346	95.99	85.668	1.488	1.469	2.736	14.147	19.979	20.068
B9J08_002992	NA	PRA1	NA	ZPS1	mRNA Has domain(s) with predicted metallopeptidase activity	4.45475	0	2.05e-09	8.20924	8.27e-13	1129	915	746	25150	9344	20523	621	267	732	2943	4752	3161	97.48	119.861	104.981	2731.31	2115.39	2411.74	83.995	32.689	83.459	365.222	539.429	581.968
B9J08_000563	NA	orf19.5165	NA	YNR029C	mRNA Ortholog of Candida guilliermondii ATCC 6260 : PGUG_03279 and Candida lusitaniae ATCC 42720 : CLUG_01520	7.08705	0	9.30372e-05	2.74908	5.43e-07	3	13	12	868	667	1184	30	6	22	18	140	80	0.259	1.703	1.689	94.266	151.003	139.137	4.058	0.735	2.508	2.234	15.892	14.729

## Sheet: Fig2B_Smooth vs Wrinkled Lac
cut-off of FDR < 0.01 and log2 Fold Change (log2FC) ± 0.585
Downregulated genes relative to Smooth on lactate
gene	C. albicans ortholog	C. albicans best hit	S. cerevisiae ortholog	S. cerevisiae best hit	product	smooth lactate	wrinkled lactate	FDR	AveExpr	P value	S1_Glu	S2_Glu	S3_Glu	W1_Glu	W2_Glu	W3_Glu	S1_Lac	S2_Lac	S3_Lac	W1_Lac	W2_Lac	W3_Lac	S1_Glu CPM	S2_Glu CPM	S3_Glu CPM	W1_Glu CPM	W2_Glu CPM	W3_Glu CPM	S1_Lac CPM	S2_Lac CPM	S3_Lac CPM	W1_Lac CPM	W2_Lac CPM	W3_Lac CPM
B9J08_002480	NA	HGT7	NA	GAL2	mRNA Has domain(s) with predicted transmembrane transporter activity, role in transmembrane transport and integral component of membrane, membrane localization	0	-2.89849	1.63028e-06	10.339	1.74e-08	11962	7315	9763	3972	1290	1510	52551	79893	51491	12457	9077	6121	1032.83	958.23	1373.9	431.363	292.044	177.446	7107.94	9781.28	5870.75	1545.9	1030.39	1126.93
B9J08_004893	NA	orf19.3232	NA	TNA1	mRNA Has domain(s) with predicted transmembrane transporter activity, role in transmembrane transport and integral component of membrane localization	0	-2.88254	0.00815988	3.52491	0.00085228	381	214	214	154	32	94	279	44	216	16	24	26	32.896	28.033	30.115	16.725	7.245	11.046	37.737	5.387	24.627	1.986	2.724	4.787
B9J08_005063	NA	NA	NA	NA	mRNA Protein of unknown function	0	-2.75467	6.88e-08	4.71512	2.17e-10	366	231	264	160	46	69	724	568	760	137	126	75	31.601	30.26	37.151	17.376	10.414	8.108	97.927	69.54	86.652	17.002	14.303	13.808
B9J08_003627	HSP21	NA	NA	NA	mRNA Ortholog of C. albicans SC5314 : C2_04010C_A/HSP21, C. dubliniensis CD36 : Cd36_18660, C. parapsilosis CDC317 : CPAR2_209280 and Candida tenuis NRRL Y-1498 : CANTEDRAFT_112588	0	-2.64648	7.49e-07	12.5912	4.69e-09	49801	18629	27503	24294	9130	10929	261562	238542	323744	49050	56812	38877	4299.93	2440.31	3870.37	2638.35	2066.95	1284.31	35378.4	29204.7	36911.7	6087.03	6449.08	7157.6
B9J08_003222	NA	NA	NA	NA	tRNA	0	-2.57855	0.00314835	2.35475	0.000259142	54	46	42	37	16	52	80	192	58	15	30	9	4.662	6.026	5.91	4.018	3.622	6.111	10.821	23.507	6.613	1.861	3.405	1.657
B9J08_003838	DAC1	NA	NA	NA	mRNA Has domain(s) with predicted N-acetylglucosamine-6-phosphate deacetylase activity and role in N-acetylglucosamine metabolic process	0	-2.47094	1.45238e-06	5.75911	1.49e-08	77	76	119	120	58	160	2915	5943	3919	1120	897	516	6.648	9.956	16.746	13.032	13.131	18.802	394.277	727.6	446.825	138.99	101.824	95
B9J08_004200	NA	NA	CWP1	NA	mRNA Ortholog(s) have structural constituent of cell wall activity, role in ascospore-type prospore membrane formation, fungal-type cell wall organization and cellular birth scar, fungal-type cell wall, prospore membrane localization	0	-2.4642	6.51335e-05	1.97076	2.05795e-06	38	16	17	28	6	15	105	137	115	31	36	9	3.281	2.096	2.392	3.041	1.358	1.763	14.202	16.773	13.112	3.847	4.087	1.657
B9J08_004312	NA	NA	NA	NA	tRNA	0	-2.41164	0.000122614	2.68477	4.81176e-06	59	50	48	31	25	46	193	78	140	26	33	21	5.094	6.55	6.755	3.367	5.66	5.406	26.105	9.55	15.962	3.227	3.746	3.866
B9J08_004376	NA	NA	NA	NA	mRNA Protein of unknown function	0	-2.39995	0.00115258	1.24837	7.63914e-05	40	10	8	19	6	13	70	53	44	18	11	6	3.454	1.31	1.126	2.063	1.358	1.528	9.468	6.489	5.017	2.234	1.249	1.105
B9J08_002977	IME2	NA	IME2	NA	mRNA Ortholog(s) have protein kinase activity, role in ascospore formation, negative regulation of DNA replication origin binding, protein phosphorylation, regulation of meiotic nuclear division and nucleus localization	0	-2.38717	1.87e-08	5.47241	4.09e-11	812	472	472	335	150	278	701	666	717	127	208	114	70.11	61.83	66.422	36.381	33.959	32.669	94.816	81.538	81.749	15.761	23.611	20.988
B9J08_001449	HMS1	NA	NA	HMS1	mRNA Has domain(s) with predicted protein dimerization activity	0	-2.38238	1.28364e-05	8.22665	2.61e-07	2435	1926	2526	1507	633	996	4818	13451	7230	2067	1734	1222	210.243	252.297	355.472	163.662	143.305	117.044	651.673	1646.8	824.329	256.512	196.837	224.981
B9J08_004171	TYE7	NA	TYE7	NA	mRNA Ortholog(s) have DNA-binding transcription factor activity, role in positive regulation of glycolytic process, transcription elongation from RNA polymerase II promoter and nuclear chromatin localization	0	-2.35924	3.51e-09	9.05445	1.54e-12	3044	1880	2111	1850	1124	2125	16011	18718	21987	4125	4710	3310	262.826	246.271	297.071	200.912	254.463	249.718	2165.62	2291.64	2506.85	511.907	534.661	609.4
B9J08_000211	NA	NA	NA	NA	mRNA Protein of unknown function	0	-2.24774	3.38e-08	6.17649	8.16e-11	737	383	435	297	116	248	1563	2189	2428	544	507	373	63.634	50.171	61.215	32.254	26.261	29.144	211.408	267.999	276.829	67.51	57.553	68.673
B9J08_000834	NA	NA	NA	NA	mRNA Ortholog of C. albicans SC5314 : C7_00350C_A, C. dubliniensis CD36 : Cd36_70560, C. parapsilosis CDC317 : CPAR2_301610 and Candida tenuis NRRL Y-1498 : cten_CGOB_00180	0	-2.23849	4.94e-09	8.71162	4.97e-12	1189	847	925	884	529	862	21454	23399	33161	5839	7625	4685	102.661	110.953	130.171	96.003	119.761	101.297	2901.83	2864.74	3780.86	724.612	865.56	862.55
B9J08_000791	NA	ZCF29	NA	TBS1	mRNA Has domain(s) with predicted DNA-binding transcription factor activity, RNA polymerase II-specific, zinc ion binding activity, role in regulation of transcription, DNA-templated and host cell nucleus, nucleus localization	0	-2.22769	0.000132201	6.35089	5.23211e-06	635	320	360	852	355	710	880	2789	1810	650	376	225	54.827	41.918	50.661	92.528	80.369	83.435	119.027	341.457	206.367	80.664	42.682	41.425
B9J08_000476	HSP104	NA	HSP104	NA	mRNA Ortholog(s) have ADP binding, ATP binding, ATPase activity, chaperone binding, misfolded protein binding, unfolded protein binding activity	0	-2.22188	6.69e-09	9.49926	9.43e-12	3701	2682	2571	3400	1852	3274	21942	16792	31463	5242	6652	4304	319.552	351.329	361.805	369.243	419.276	384.741	2967.83	2055.84	3587.26	650.525	755.109	792.405
B9J08_002244	NA	NA	NA	NA	mRNA Protein of unknown function	0	-2.21469	3.22526e-06	9.19341	4.61e-08	7599	4738	5961	2574	671	1246	11742	19856	14711	4078	3721	2989	656.114	620.655	838.863	279.539	151.908	146.423	1588.2	2430.97	1677.28	506.074	422.393	550.301
B9J08_002565	NA	NA	NA	YPL077C	mRNA Ortholog of C. albicans SC5314 : CR_04460C_A, C. dubliniensis CD36 : Cd36_29810, C. parapsilosis CDC317 : CPAR2_206030 and Candida tenuis NRRL Y-1498 : CANTEDRAFT_102086	0	-2.19041	0.000251853	1.09581	1.15055e-05	6	7	11	4	4	3	67	124	102	27	24	17	0.518	0.917	1.548	0.434	0.906	0.353	9.062	15.181	11.63	3.351	2.724	3.13
B9J08_002564	GPI2	NA	GPI2	NA	mRNA Ortholog(s) have role in GPI anchor biosynthetic process and glycosylphosphatidylinositol-N-acetylglucosaminyltransferase (GPI-GnT) complex localization	0	-2.18109	0.000862439	2.54628	5.34577e-05	81	39	51	40	11	30	118	135	105	28	72	8	6.994	5.109	7.177	4.344	2.49	3.525	15.96	16.528	11.972	3.475	8.173	1.473
B9J08_004544	NA	OPT2	NA	OPT2	mRNA Has domain(s) with predicted role in transmembrane transport	0	-2.13494	8.6e-07	8.81626	6.41e-09	3364	2139	2357	2110	776	1197	11290	16439	13222	4600	3750	2216	290.455	280.199	331.689	229.148	175.679	140.664	1527.06	2012.62	1507.51	570.853	425.685	407.985
B9J08_004199	NA	NA	NA	NA	tRNA	0	-2.06935	2.6049e-05	3.21643	7.02e-07	48	22	55	49	26	61	291	166	292	54	83	58	4.144	2.882	7.74	5.321	5.886	7.168	39.36	20.323	33.292	6.701	9.422	10.678
B9J08_002976	NA	NA	YGR127W	NA	mRNA Ortholog(s) have intracellular localization	0	-2.05919	1.87e-08	8.9683	4.15e-11	7436	4378	4193	3412	1478	2527	7252	9312	8743	2538	2702	1569	642.04	573.497	590.061	370.546	334.606	296.958	980.891	1140.07	996.834	314.962	306.721	288.867
B9J08_003542	NA	AYR2	NA	AYR1	mRNA Has domain(s) with predicted oxidoreductase activity and role in metabolic process	0	-2.05028	9.00968e-05	7.07313	3.13272e-06	1508	913	979	1118	466	967	1449	4167	1872	789	711	364	130.204	119.599	137.77	121.416	105.498	113.636	195.989	510.165	213.436	97.914	80.71	67.016
B9J08_001277	LEU4	NA	LEU4	NA	mRNA Ortholog(s) have 2-isopropylmalate synthase activity, role in leucine biosynthetic process and cytoplasm, mitochondrion localization	0	-2.0431	6.88e-08	6.04965	2.16e-10	779	379	359	414	175	351	1145	1389	1567	414	424	265	67.261	49.647	50.52	44.961	39.618	41.247	154.87	170.055	178.662	51.377	48.131	48.789
B9J08_003837	NAG1	NA	NA	NA	mRNA Has domain(s) with predicted glucosamine-6-phosphate deaminase activity and role in N-acetylglucosamine metabolic process, carbohydrate metabolic process	0	-2.02624	1.31215e-06	7.88737	1.25e-08	1386	1076	833	1255	604	1218	4724	8658	6058	2199	2036	1079	119.67	140.951	117.224	136.294	136.74	143.132	638.959	1060	690.704	272.893	231.119	198.654
B9J08_005308	NA	orf19.3105	NA	DIT2	mRNA Has domain(s) with predicted electron transfer activity, heme binding, iron ion binding, monooxygenase activity, oxidoreductase activity, acting on paired donors, with incorporation or reduction of molecular oxygen activity	0	-2.02363	0.00346125	1.75339	0.000293255	63	31	34	21	12	26	30	60	53	6	22	13	5.44	4.061	4.785	2.281	2.717	3.055	4.058	7.346	6.043	0.745	2.497	2.393
B9J08_001450	CFL4	NA	FRE2	NA	mRNA Ortholog(s) have ferric-chelate reductase activity, role in copper ion import, iron ion transport, nuclear-transcribed mRNA catabolic process, nonsense-mediated decay and plasma membrane localization	0	-2.01629	0.00106786	3.73003	6.91991e-05	584	277	403	214	103	234	65	88	77	26	22	14	50.424	36.286	56.712	23.241	23.318	27.498	8.792	10.774	8.779	3.227	2.497	2.578
B9J08_003541	NA	NA	NA	NA	mRNA Has domain(s) with predicted hydrolase activity	0	-1.95825	1.20062e-06	5.27885	1.05e-08	912	548	536	751	353	590	318	248	299	85	102	59	78.744	71.785	75.429	81.559	79.916	69.333	43.012	30.363	34.091	10.548	11.579	10.862
B9J08_002032	PSA2	NA	NA	PSA1	mRNA Has domain(s) with predicted nucleotidyltransferase activity and role in biosynthetic process	0	-1.94198	1.86e-08	5.20215	3.36e-11	316	212	214	221	79	159	761	731	975	236	304	173	27.284	27.771	30.115	24.001	17.885	18.685	102.931	89.496	111.165	29.287	34.509	31.851
B9J08_000846	NA	NA	NA	NA	mRNA Ortholog of C. albicans SC5314 : CR_08830W_A, C. dubliniensis CD36 : Cd36_26620, C. parapsilosis CDC317 : CPAR2_201160 and Candida tenuis NRRL Y-1498 : CANTEDRAFT_115461	0	-1.93681	0.00215277	5.65851	0.000168097	472	351	226	274	103	287	1768	407	1774	229	456	297	40.754	45.979	31.804	29.757	23.318	33.727	239.136	49.829	202.263	28.419	51.763	54.68
B9J08_000125	NA	NA	NA	NA	tRNA	0	-1.91902	0.00133995	3.71655	9.3303e-05	140	72	76	110	67	74	368	113	248	81	66	48	12.088	9.432	10.695	11.946	15.168	8.696	49.775	13.835	28.276	10.052	7.492	8.837
B9J08_002624	NA	NA	NA	NA	mRNA Protein of unknown function	0	-1.89034	4.41e-07	8.88553	2.04e-09	6876	3313	3195	3184	1047	2146	7918	8587	9439	3027	2982	1840	593.689	433.987	449.617	345.785	237.031	252.185	1070.97	1051.31	1076.19	375.646	338.505	338.76
B9J08_003062	NA	NA	NA	NA	mRNA	0	-1.86029	0.00233949	1.82037	0.00018409	22	21	10	42	27	30	78	33	69	16	24	12	1.9	2.751	1.407	4.561	6.113	3.525	10.55	4.04	7.867	1.986	2.724	2.209
B9J08_002250	HGT12	NA	NA	SNF3	mRNA Has domain(s) with predicted transmembrane transporter activity, role in transmembrane transport and integral component of membrane, membrane localization	0	-1.83212	9.77e-07	3.87088	7.86e-09	85	28	43	29	11	16	752	652	1035	319	304	145	7.339	3.668	6.051	3.149	2.49	1.88	101.714	79.824	118.006	39.587	34.509	26.696
B9J08_005197	NA	NA	YNL211C	NA	mRNA Ortholog of S. cerevisiae : MRX7, C. albicans SC5314 : C6_00120W_A, C. glabrata CBS138 : CAGL0K04785g, C. dubliniensis CD36 : Cd36_19820 and C. parapsilosis CDC317 : CPAR2_603375	0	-1.81383	0.000143951	4.49321	5.88088e-06	355	136	188	181	66	102	361	444	291	103	138	99	30.651	17.815	26.456	19.657	14.942	11.986	48.828	54.359	33.178	12.782	15.665	18.227
B9J08_004331	ADH1	NA	NA	ADH3	mRNA Has domain(s) with predicted oxidoreductase activity, transferase activity, transferring acyl groups other than amino-acyl groups, zinc ion binding activity and role in oxidation-reduction process	0	-1.7793	1.68818e-06	13.2568	1.86e-08	97898	51334	49920	52716	26922	45979	158813	251546	200676	78917	71238	46527	8452.73	6724.51	7025	5725.01	6094.89	5403.18	21480.7	30796.7	22880.1	9793.49	8086.66	8566.03
B9J08_000030	NA	NA	NA	NA	mRNA Ortholog of C. albicans SC5314 : CR_00310C_A, C. dubliniensis CD36 : Cd36_25350, C. parapsilosis CDC317 : CPAR2_800410 and Candida tenuis NRRL Y-1498 : CANTEDRAFT_114085	0	-1.77706	0.000253239	5.34474	1.16707e-05	572	454	427	562	349	686	206	460	449	139	120	83	49.388	59.472	60.09	61.034	79.01	80.615	27.863	56.318	51.193	17.25	13.622	15.281
B9J08_002592	NA	NA	NA	NA	mRNA Protein of unknown function	0	-1.75766	0.00011783	4.2322	4.56483e-06	563	325	284	253	113	281	129	119	152	33	55	46	48.611	42.573	39.966	27.476	25.582	33.021	17.448	14.569	17.33	4.095	6.243	8.469
B9J08_002566	HXK2	NA	HXK2	NA	mRNA Ortholog(s) have fructokinase activity, glucokinase activity, hexokinase activity, mannokinase activity	0	-1.75416	0.000398207	12.8246	2.00346e-05	111087	48426	63703	42240	17270	30974	72733	214382	120428	54888	47648	24795	9591.49	6343.58	8964.62	4587.3	3909.77	3639.88	9837.72	26246.7	13730.6	6811.52	5408.82	4564.98
B9J08_002790	NA	NA	NA	RME1	mRNA Has domain(s) with predicted nucleic acid binding activity	0	-1.75308	9.23826e-05	3.07782	3.25356e-06	74	82	64	79	35	76	111	111	118	46	48	20	6.389	10.742	9.006	8.579	7.924	8.931	15.014	13.59	13.454	5.709	5.449	3.682
B9J08_002627	XYL2	NA	SOR2	NA	mRNA Ortholog(s) have L-iditol 2-dehydrogenase activity	0	-1.75169	9.32205e-06	9.51962	1.73e-07	5109	2784	3311	3353	1426	2925	13336	25961	19930	8157	6379	4585	441.122	364.691	465.941	364.139	322.833	343.729	1803.8	3178.4	2272.32	1012.27	724.119	844.139
B9J08_000285	CMK1	NA	TDA1	NA	mRNA Ortholog(s) have protein serine/threonine kinase activity, role in peptidyl-serine phosphorylation and cytoplasm, nucleus localization	0	-1.73947	4.62057e-06	8.34562	7.81e-08	2691	1636	1873	1571	550	1202	5387	10108	8306	3068	2821	1854	232.347	214.308	263.578	170.612	124.515	141.252	728.635	1237.52	947.01	380.734	320.229	341.338
B9J08_002542	SIP5	NA	SIP5	NA	mRNA Ortholog(s) have role in cellular response to glucose starvation	0	-1.73611	7.49e-07	8.08052	5.24e-09	4091	2653	2313	2590	1172	2362	2829	3847	3004	1351	1084	795	353.226	347.53	325.497	281.276	265.33	277.568	382.645	470.988	342.501	167.657	123.051	146.367
B9J08_002118	NA	NA	NA	NA	mRNA Protein of unknown function	0	-1.71494	5.18e-07	7.80172	2.61e-09	2342	1519	1274	2132	664	1652	3492	2701	4380	1344	1323	865	202.213	198.982	179.284	231.537	150.323	194.133	472.321	330.683	499.386	166.788	150.182	159.254
B9J08_001325	NA	NA	NA	SPS19	mRNA Has domain(s) with predicted oxidoreductase activity and role in metabolic process	0	-1.71187	1.69405e-05	6.36244	3.78e-07	1016	531	577	410	159	385	1113	2241	1527	577	626	393	87.724	69.558	81.198	44.526	35.996	45.243	150.542	274.365	174.101	71.605	71.061	72.355
B9J08_002761	CHT3	NA	CTS1	NA	mRNA Ortholog(s) have endochitinase activity, role in septum digestion after cytokinesis and cellular bud neck, extracellular region, fungal-type cell wall localization	0	-1.6939	7.49e-07	7.4968	5.2e-09	1684	1483	1335	1651	785	1849	2473	1648	3200	832	920	668	145.4	194.266	187.868	179.3	177.717	217.284	334.493	201.764	364.848	103.25	104.435	122.985
B9J08_000483	HSP70	NA	SSA4	NA	mRNA Ortholog(s) have unfolded protein binding activity, role in SRP-dependent cotranslational protein targeting to membrane, translocation, protein folding and cytoplasm, nucleus localization	0	-1.69321	4.41e-07	10.7816	2.01e-09	15840	9675	9063	12766	6342	8676	28460	28001	40316	12869	12790	7616	1367.66	1267.38	1275.39	1386.4	1435.77	1019.55	3849.44	3428.16	4596.63	1597.02	1451.87	1402.17
B9J08_003628	NA	POX1-3	NA	POX1	mRNA Ortholog(s) have role in fatty acid beta-oxidation, long-chain fatty acid catabolic process and peroxisome localization	0	-1.67443	1.85529e-05	7.81195	4.55e-07	3714	1284	1696	1348	468	822	4437	3075	4814	1372	1786	1086	320.675	168.198	238.67	146.394	105.951	96.597	600.14	376.472	548.869	170.263	202.74	199.942
B9J08_002481	NA	HGT8	NA	HXT9	mRNA Has domain(s) with predicted transmembrane transporter activity, role in transmembrane transport and integral component of membrane, membrane localization	0	-1.66561	1.83541e-05	13.0365	4.28e-07	86159	37817	35183	44830	18246	32145	157958	226788	185146	86302	73481	43339	7439.15	4953.85	4951.14	4868.58	4130.73	3777.49	21365.1	27765.6	21109.4	10710	8341.28	7979.1
B9J08_002812	NA	NA	NA	NA	tRNA	0	-1.66382	0.00268971	3.57132	0.000215978	75	70	67	93	58	78	310	99	243	61	106	46	6.476	9.17	9.429	10.1	13.131	9.166	41.93	12.121	27.706	7.57	12.033	8.469
B9J08_001852	NA	NA	NA	STP2	mRNA Has domain(s) with predicted nucleic acid binding activity	0	-1.66007	2.53172e-06	7.12813	3.31e-08	1073	676	576	1064	445	854	2000	3457	2707	972	1072	752	92.645	88.553	81.058	115.551	100.744	100.357	270.516	423.24	308.639	120.624	121.689	138.45
B9J08_001255	MAL2	NA	IMA1	NA	mRNA Ortholog(s) have dextrin alpha-glucosidase activity, maltose alpha-glucosidase activity, oligo-1,6-glucosidase activity, starch alpha-glucosidase activity, sucrose alpha-glucosidase activity and role in disaccharide catabolic process	0	-1.65947	0.00050798	6.66647	2.76392e-05	1919	1444	1420	1013	306	757	1397	527	1550	299	440	383	165.691	189.157	199.83	110.013	69.276	88.958	188.955	64.521	176.723	37.105	49.947	70.514
B9J08_003836	HXK1	NA	HXK1	NA	mRNA Ortholog(s) have hexokinase activity, role in fructose import, fructose metabolic process, glucose import, glucose metabolic process, glycolytic process, mannose metabolic process and cytoplasm, mitochondrion localization	0	-1.6414	4.90151e-05	6.36191	1.48949e-06	790	380	452	436	160	339	1282	2548	1693	807	694	423	68.21	49.778	63.608	47.35	36.223	39.837	173.401	311.951	193.028	100.148	78.78	77.878
B9J08_002119	NA	NA	NA	NA	mRNA Ortholog of C. albicans SC5314 : C7_03550C_A, C. dubliniensis CD36 : Cd36_73200, C. parapsilosis CDC317 : CPAR2_703760 and Candida tenuis NRRL Y-1498 : CANTEDRAFT_115444	0	-1.62352	0.000530386	3.55278	2.97802e-05	71	47	57	50	15	59	285	195	445	70	131	144	6.13	6.157	8.021	5.43	3.396	6.933	38.549	23.874	50.737	8.687	14.871	26.512
B9J08_001171	NA	ADH5	NA	ADH2	mRNA Has domain(s) with predicted oxidoreductase activity, transferase activity, transferring acyl groups other than amino-acyl groups, zinc ion binding activity and role in oxidation-reduction process	0	-1.62066	1.30219e-06	11.5676	1.18e-08	24810	15250	14961	9931	3733	5565	88463	86273	93785	33859	38322	25029	2142.15	1997.68	2105.39	1078.52	845.117	653.966	11965.3	10562.4	10692.9	4201.85	4350.16	4608.06
B9J08_005317	SUT1	NA	SUT1	NA	mRNA Ortholog(s) have RNA polymerase II repressing transcription factor binding activity	0	-1.61267	1.18603e-05	4.36197	2.32e-07	250	155	116	122	46	123	369	252	435	151	128	100	21.586	20.304	16.324	13.249	10.414	14.454	49.91	30.852	49.597	18.739	14.53	18.411
B9J08_003306	NA	TDH3	NA	TDH2	mRNA Has domain(s) with predicted NAD binding, NADP binding, oxidoreductase activity, acting on the aldehyde or oxo group of donors, NAD or NADP as acceptor activity and role in glucose metabolic process, oxidation-reduction process	0	-1.58963	1.04991e-06	13.237	8.66e-09	82078	68533	56750	63239	35435	78996	121414	168404	159602	63677	62008	39997	7086.79	8977.5	7986.16	6867.81	8022.16	9283.15	16422.2	20617.7	18197	7902.22	7038.91	7363.8
B9J08_004176	NA	LIP10	NA	NA	mRNA Has domain(s) with predicted triglyceride lipase activity and role in lipid catabolic process	0	-1.58575	0.00033641	5.08265	1.61807e-05	824	314	280	171	64	101	606	352	746	195	265	150	71.146	41.133	39.403	18.571	14.489	11.869	81.966	43.095	85.055	24.199	30.082	27.616
B9J08_003279	NA	NA	NA	PSP1	mRNA Ortholog of C. albicans SC5314 : C7_00880C_A, C. dubliniensis CD36 : Cd36_70820, C. parapsilosis CDC317 : CPAR2_301430 and Candida tenuis NRRL Y-1498 : CANTEDRAFT_132919	0	-1.57165	1.3664e-05	8.66299	2.83e-07	5540	2480	2809	2282	1045	1484	5757	8192	7554	3331	2795	1924	478.336	324.868	395.297	247.827	236.578	174.391	778.68	1002.95	861.27	413.372	317.278	354.226
B9J08_002869	STF2	NA	TMA10	NA	mRNA Ortholog of S. cerevisiae : TMA10, C. albicans SC5314 : C2_00250W_A/STF2, C. dubliniensis CD36 : Cd36_15230, C. parapsilosis CDC317 : CPAR2_213530 and Candida tenuis NRRL Y-1498 : cten_CGOB_00066	0	-1.54787	9.63574e-05	12.105	3.49051e-06	45372	15560	18227	18429	6694	10003	110604	118702	128029	45917	59039	32780	3917.52	2038.29	2565	2001.41	1515.46	1175.49	14960.1	14532.7	14597.2	5698.23	6701.88	6035.09
B9J08_003466	MDH1-3	NA	MDH3	NA	mRNA Ortholog(s) have L-malate dehydrogenase activity, mRNA binding activity, role in NADH regeneration, fatty acid beta-oxidation and peroxisomal matrix, peroxisome localization	0	-1.52452	3.46801e-06	7.20659	5.23e-08	1990	1621	1276	1308	589	1357	1985	1122	1992	615	728	557	171.821	212.343	179.565	142.05	133.344	159.467	268.487	137.366	227.118	76.321	82.64	102.549
B9J08_002423	STB3	NA	STB3	NA	mRNA Ortholog(s) have DNA-binding transcription activator activity, RNA polymerase II-specific, sequence-specific DNA binding activity and role in positive regulation of transcription from RNA polymerase II promoter by glucose	0	-1.51402	3.89717e-06	8.31244	5.97e-08	2822	1350	1473	1479	515	1008	6238	8161	8637	3497	3329	2138	243.658	176.844	207.288	160.621	116.591	118.454	843.74	999.15	984.749	433.973	377.895	393.625
B9J08_002231	PDC11	NA	PDC1	NA	mRNA Ortholog(s) have branched-chain-2-oxoacid decarboxylase activity, pyruvate decarboxylase activity	0	-1.49704	0.000640734	12.0885	3.66208e-05	49064	24833	24194	25136	13504	32197	41953	105872	74286	38690	27816	18067	4236.29	3253.01	3404.71	2729.79	3057.18	3783.6	5674.48	12961.9	8469.73	4801.37	3157.56	3326.3
B9J08_002840	MSN4	NA	MSN2	NA	mRNA Ortholog(s) have DNA-binding transcription factor activity, RNA polymerase II-specific, cis-regulatory region sequence-specific DNA binding activity	0	-1.48446	1.14479e-06	6.94604	9.68e-09	1115	1062	871	936	404	1028	1592	1418	2089	628	776	591	96.272	139.117	122.572	101.65	91.462	120.805	215.331	173.605	238.178	77.934	88.089	108.808
B9J08_004285	HSP78	NA	HSP78	NA	mRNA Ortholog(s) have ATPase activity, misfolded protein binding activity, role in cellular response to heat, mitochondrial genome maintenance, protein refolding, protein stabilization, protein unfolding and mitochondrial matrix localization	0	-1.47881	4.41e-07	7.89754	1.94e-09	2826	1963	1779	2232	1078	2123	2180	3016	3361	1231	1346	810	244.003	257.144	250.35	242.397	244.049	249.483	294.862	369.248	383.205	152.765	152.793	149.128
B9J08_001860	PGK1	NA	PGK1	NA	mRNA Ortholog(s) have phosphoglycerate kinase activity, role in gluconeogenesis, glycolytic process and cytoplasm, mitochondrion localization	0	-1.47618	0.000164421	11.6473	6.78332e-06	31576	27380	21521	29928	15993	36483	25554	56557	35485	18841	16776	9999	2726.34	3586.65	3028.55	3250.21	3620.67	4287.27	3456.38	6924.26	4045.83	2338.14	1904.35	1840.9
B9J08_004375	GPM1	NA	GPM1	NA	mRNA Ortholog(s) have 2,3-bisphosphoglycerate-dependent phosphoglycerate mutase activity, phosphoglycerate mutase activity, role in gluconeogenesis, glycolytic process and cytosol, mitochondrial intermembrane space, mitochondrion localization	0	-1.47584	0.000243727	12.4848	1.10852e-05	79052	41551	40980	49155	24413	39178	52644	110430	65063	39204	29944	19878	6825.52	5442.98	5766.92	5338.28	5526.88	4603.97	7120.52	13519.9	7418.17	4865.16	3399.13	3659.72
B9J08_000218	NA	NA	NA	NA	tRNA	0	-1.47266	0.00180766	4.60419	0.000134237	237	238	250	193	121	160	393	156	375	129	120	98	20.463	31.177	35.181	20.96	27.393	18.802	53.156	19.099	42.756	16.009	13.622	18.043
B9J08_000265	NA	NA	NA	NA	rRNA	0	-1.47212	0.000417908	5.36471	2.13622e-05	121	192	160	307	158	197	1214	541	1040	371	405	285	10.447	25.151	22.516	33.34	35.77	23.15	164.203	66.235	118.576	46.041	45.974	52.471
B9J08_002451	NA	CDR4	NA	PDR5	mRNA Has domain(s) with predicted ATP binding, ATPase activity, ATPase-coupled transmembrane transporter activity, nucleoside-triphosphatase activity, nucleotide binding activity	0	-1.47068	1.12e-07	8.44222	3.82e-10	3337	2223	2460	2282	871	1895	5374	5162	6514	2627	2569	1657	288.124	291.202	346.184	247.827	197.186	222.689	726.877	631.983	742.695	326.007	291.623	305.068
B9J08_001775	ATO7	NA	NA	ATO2	mRNA Has domain(s) with predicted integral component of membrane localization	0	-1.46468	1.45e-07	6.94182	5.24e-10	946	643	634	582	266	534	2743	1973	3003	1119	1276	710	81.68	84.23	89.22	63.206	60.22	62.753	371.013	241.554	342.387	138.866	144.847	130.717
B9J08_004698	NA	NA	YHR131C	NA	mRNA Ortholog of S. cerevisiae : YHR131C, C. albicans SC5314 : C5_03510C_A, C. glabrata CBS138 : CAGL0G06182g, C. dubliniensis CD36 : Cd36_53260 and C. parapsilosis CDC317 : CPAR2_101770	0	-1.46207	2.48511e-06	6.97734	3.1e-08	1096	888	910	957	416	971	1461	2095	1874	866	799	520	94.631	116.324	128.06	103.931	94.179	114.106	197.612	256.49	213.664	107.469	90.699	95.737
B9J08_001012	NA	NA	YOR338W	NA	mRNA Ortholog of S. cerevisiae : YOR338W, C. albicans SC5314 : C2_09880C_A, C. glabrata CBS138 : CAGL0E05456g, C. dubliniensis CD36 : Cd36_23960 and C. parapsilosis CDC317 : CPAR2_407140	0	-1.46016	0.00152245	6.7029	0.000110099	855	469	643	335	176	383	1272	4184	2625	1064	1129	735	73.823	61.437	90.486	36.381	39.845	45.008	172.048	512.246	299.29	132.041	128.16	135.32
B9J08_003397	ATC1	NA	ATH1	NA	mRNA Ortholog(s) have alpha,alpha-trehalase activity and role in cellular response to desiccation, cellular response to ethanol, cellular response to freezing, trehalose catabolic process	0	-1.4549	1.81865e-05	7.42478	4.17e-07	1716	1511	1415	1835	663	1419	2373	1337	2673	745	1088	672	148.163	197.934	199.126	199.283	150.097	166.753	320.967	163.689	304.762	92.453	123.506	123.721
B9J08_004468	FRP1	NA	NA	FRE4	mRNA Has domain(s) with predicted oxidoreductase activity and role in oxidation-reduction process	0	-1.45359	3.4416e-05	5.54298	9.84e-07	899	598	678	1217	546	1078	260	211	292	79	133	104	77.622	78.335	95.412	132.167	123.609	126.68	35.167	25.833	33.292	9.804	15.098	19.147
B9J08_002789	SMF12	NA	SMF1	NA	mRNA Ortholog(s) have inorganic cation transmembrane transporter activity, solute:proton symporter activity	0	-1.43645	6.83891e-05	5.8484	2.20783e-06	1262	936	876	740	506	957	306	437	366	172	164	114	108.964	122.612	123.275	80.365	114.554	112.461	41.389	53.502	41.73	21.345	18.617	20.988
B9J08_004748	POS5	NA	POS5	NA	mRNA Ortholog(s) have NADH kinase activity, role in NADP biosynthetic process, cellular response to oxidative stress and mitochondrial matrix localization	0	-1.42966	3.10792e-05	5.55428	8.69e-07	691	368	354	399	177	339	500	557	666	352	210	171	59.662	48.206	49.817	43.332	40.071	39.837	67.629	68.193	75.934	43.683	23.838	31.483
B9J08_004899	NA	orf19.1430	NA	NA	mRNA Protein of unknown function	0	-1.4283	7.64517e-05	7.00682	2.52326e-06	2716	2678	2225	2455	1111	2724	705	850	566	325	345	197	234.505	350.805	313.114	266.615	251.52	320.109	95.357	104.065	64.533	40.332	39.163	36.269
B9J08_003404	NA	NA	NA	GIP2	mRNA Ortholog of C. albicans SC5314 : C1_01140C_A, C. dubliniensis CD36 : Cd36_01070, C. parapsilosis CDC317 : CPAR2_109800 and Candida tenuis NRRL Y-1498 : CANTEDRAFT_114209	0	-1.42632	6.77e-07	7.3227	4.04e-09	1246	1126	1034	1191	456	1102	2093	2368	2935	1070	1143	810	107.582	147.501	145.51	129.344	103.234	129.501	283.095	289.914	334.634	132.785	129.749	149.128
B9J08_004296	NA	NA	NA	NA	mRNA Ortholog of C. albicans SC5314 : C5_04690C_A, C. parapsilosis CDC317 : CPAR2_101170, Candida tenuis NRRL Y-1498 : CANTEDRAFT_113855 and Debaryomyces hansenii CBS767 : DEHA2G20240g	0	-1.41435	2.23848e-05	3.81449	5.77e-07	199	109	90	45	10	28	349	292	382	173	179	81	17.182	14.278	12.665	4.887	2.264	3.29	47.205	35.75	43.554	21.469	20.319	14.913
B9J08_004930	ARO10	NA	ARO10	NA	mRNA Ortholog(s) have carboxy-lyase activity, phenylpyruvate decarboxylase activity	0	-1.41307	0.0008375	9.28364	5.14184e-05	4441	1585	2572	2099	722	1215	13211	26709	22886	9503	9868	6028	383.446	207.627	361.945	227.953	163.454	142.78	1786.89	3269.98	2609.35	1179.31	1120.18	1109.81
B9J08_005090	NA	NA	NA	NA	mRNA Ortholog of C. albicans SC5314 : C1_05540C_A, C. dubliniensis CD36 : Cd36_05260, C. parapsilosis CDC317 : CPAR2_107600 and Candida tenuis NRRL Y-1498 : CANTEDRAFT_113692	0	-1.40917	6.51335e-05	9.00551	2.04487e-06	8673	6653	5962	6734	2820	5905	3201	6165	3770	1897	1913	1446	748.846	871.511	839.004	731.319	638.422	693.921	432.961	754.78	429.837	235.415	217.156	266.221
B9J08_002245	NA	NA	NA	YML131W	mRNA Has domain(s) with predicted oxidoreductase activity, transferase activity, transferring acyl groups other than amino-acyl groups, zinc ion binding activity and role in oxidation-reduction process	0	-1.40128	0.00415458	8.82	0.000369556	9403	4922	4793	5970	2475	3796	2357	7095	3605	2381	1950	924	811.875	644.759	674.496	648.348	560.317	446.084	318.803	868.64	411.025	295.479	221.356	170.117
B9J08_004928	PFK2	NA	PFK2	NA	mRNA Ortholog(s) have 6-phosphofructokinase activity, ATP binding, fructose-6-phosphate binding, mRNA binding activity	0	-1.39933	0.000108482	9.4025	4.0607e-06	7643	4189	3897	4880	2575	3969	7751	13790	8936	5390	4417	2893	659.913	548.739	548.406	529.973	582.956	466.414	1048.38	1688.31	1018.84	668.891	501.401	532.627
B9J08_004236	NA	NA	YLR224W	NA	mRNA Ortholog(s) have role in SCF-dependent proteasomal ubiquitin-dependent protein catabolic process, cellular response to methylmercury and SCF ubiquitin ligase complex localization	0	-1.38383	2.43386e-06	5.0459	2.99e-08	152	123	172	153	57	155	707	755	882	336	380	278	13.124	16.112	24.205	16.616	12.904	18.215	95.627	92.435	100.561	41.697	43.136	51.182
B9J08_004610	NBP35	NA	NBP35	NA	mRNA Ortholog(s) have 4 iron, 4 sulfur cluster binding, ATPase activity, iron ion binding activity, role in iron-sulfur cluster assembly, tRNA wobble uridine modification and Nbp35-Cfd1 ATPase complex, cytoplasm, nucleus localization	0	-1.38267	0.00501499	2.22716	0.000468295	47	39	28	42	19	16	67	54	80	38	27	21	4.058	5.109	3.94	4.561	4.301	1.88	9.062	6.611	9.121	4.716	3.065	3.866
B9J08_001053	NA	NA	NA	NA	mRNA Protein of unknown function	0	-1.38109	1.83541e-05	5.1035	4.27e-07	400	237	186	270	93	278	519	387	566	255	225	147	34.537	31.046	26.175	29.322	21.054	32.669	70.199	47.38	64.533	31.645	25.541	27.064
B9J08_002108	FTR1	NA	FTR1	NA	mRNA Ortholog(s) have high-affinity ferrous iron transmembrane transporter activity, iron ion transmembrane transporter activity and role in arsenate ion transmembrane transport, iron ion transmembrane transport, reductive iron assimilation	0	-1.37457	0.000845272	8.39607	5.22235e-05	7304	9141	7734	9735	4652	10261	970	2005	1169	532	678	480	630.643	1197.43	1088.37	1057.23	1053.17	1205.81	131.2	245.472	133.284	66.02	76.964	88.372
B9J08_001659	NA	NA	NA	NA	mRNA Ortholog of C. albicans SC5314 : CR_09460C_A, C. parapsilosis CDC317 : CPAR2_201020, Candida tenuis NRRL Y-1498 : CANTEDRAFT_112678 and Debaryomyces hansenii CBS767 : DEHA2E02618g	0	-1.37026	6.15e-07	7.839	3.22e-09	2532	1625	1673	1601	577	1258	3294	2740	4298	1557	1736	1095	218.618	212.867	235.433	173.87	130.627	147.833	445.54	335.458	490.037	193.221	197.064	201.599
B9J08_001787	NA	RGT1	NA	RGT1	mRNA Has domain(s) with predicted DNA-binding transcription factor activity, RNA polymerase II-specific, zinc ion binding activity, role in regulation of transcription, DNA-templated and host cell nucleus, nucleus localization	0	-1.3659	1.31215e-06	6.34111	1.29e-08	903	551	563	566	230	585	1066	1042	1305	453	552	458	77.967	72.178	79.228	61.468	52.07	68.746	144.185	127.572	148.79	56.217	62.661	84.322
B9J08_004469	PGA7	NA	NA	NA	mRNA Ortholog of C. albicans SC5314 : C4_00120W_A/PGA7, C. dubliniensis CD36 : Cd36_40180, C. parapsilosis CDC317 : CPAR2_402900 and Candida tenuis NRRL Y-1498 : CANTEDRAFT_113721	0	-1.35716	0.00018481	7.20138	7.66169e-06	2923	2995	3026	3266	1103	2608	832	671	838	275	380	374	252.378	392.331	425.835	354.691	249.709	306.477	112.535	82.15	95.545	34.127	43.136	68.857
B9J08_002886	GIT3	NA	NA	GIT1	mRNA Has domain(s) with predicted transmembrane transporter activity, role in transmembrane transport and integral component of membrane localization	0	-1.34907	0.00611587	5.30025	0.000601917	575	540	453	628	301	627	159	462	296	148	130	87	49.647	70.737	63.749	68.201	68.144	73.681	21.506	56.563	33.748	18.367	14.757	16.017
B9J08_003587	ZSF1	NA	TIS11	NA	mRNA Ortholog(s) have mRNA binding activity, role in cellular iron ion homeostasis, nuclear-transcribed mRNA catabolic process and cytoplasm, nucleus localization	0	-1.34739	3.14806e-06	8.35017	4.31e-08	2234	1820	1951	2370	832	1769	5959	5185	5529	2721	3138	1600	192.888	238.411	274.555	257.384	188.357	207.883	806.003	634.799	630.39	337.672	356.214	294.574
B9J08_003550	YWP1	NA	NA	FLO5	mRNA Ortholog of C. albicans SC5314 : C2_08590W_A/YWP1, C. dubliniensis CD36 : Cd36_22720, C. parapsilosis CDC317 : CPAR2_806670/YWP1 and Debaryomyces hansenii CBS767 : DEHA2A14366g	0	-1.32585	2.60036e-05	9.8703	6.96e-07	7820	9570	7903	12586	5216	14859	7611	8451	10020	4239	4624	2751	675.196	1253.62	1112.15	1366.85	1180.85	1746.14	1029.45	1034.65	1142.43	526.054	524.899	506.484
B9J08_000724	NA	NA	NA	NA	mRNA Ortholog of C. albicans SC5314 : C1_10060C_A, C. dubliniensis CD36 : Cd36_09460, C. parapsilosis CDC317 : CPAR2_700850 and Candida tenuis NRRL Y-1498 : CANTEDRAFT_114857	0	-1.3081	0.00192047	6.24763	0.000148798	1292	1116	921	925	410	1055	373	897	554	292	250	226	111.554	146.191	129.608	100.456	92.82	123.977	50.451	109.82	63.164	36.237	28.379	41.609
B9J08_002382	NA	NA	VID24	NA	mRNA Ortholog(s) have role in negative regulation of gluconeogenesis, proteasome-mediated ubiquitin-dependent protein catabolic process, protein catabolic process in the vacuole, protein targeting to vacuole	0	-1.30034	8.09613e-05	7.51574	2.75356e-06	1320	1311	1009	1380	674	1689	1948	3295	2500	1274	1240	897	113.972	171.735	141.992	149.869	152.587	198.481	263.483	403.406	285.038	158.102	140.76	165.146
B9J08_004697	NA	NA	CTR86	NA	mRNA Ortholog of S. cerevisiae : CTR86, C. albicans SC5314 : C5_02280C_A, C. glabrata CBS138 : CAGL0K09306g, C. dubliniensis CD36 : Cd36_52090 and C. parapsilosis CDC317 : CPAR2_304340	0	-1.30007	1.35308e-06	6.88982	1.36e-08	1007	707	680	773	259	605	1772	2098	2178	967	1006	738	86.947	92.614	95.693	83.949	58.635	71.096	239.677	256.858	248.325	120.003	114.197	135.872
B9J08_003632	CDC19	NA	CDC19	NA	mRNA Ortholog(s) have pyruvate kinase activity, role in canonical glycolysis, glycolytic process, pyruvate biosynthetic process, pyruvate metabolic process and cytoplasm, intracellular localization	0	-1.29971	0.000322251	11.3358	1.54348e-05	22069	21177	16835	22801	12442	27101	24075	43267	25989	17498	15212	9053	1905.48	2774.09	2369.11	2476.21	2816.75	3184.75	3256.34	5297.17	2963.14	2171.48	1726.81	1666.74
B9J08_002248	NA	NA	NA	NA	mRNA Protein of unknown function	0	-1.29852	0.00446347	4.92495	0.000401523	315	353	234	452	188	312	212	394	261	191	127	73	27.198	46.241	32.93	49.088	42.561	36.664	28.675	48.237	29.758	23.703	14.417	13.44
B9J08_004559	NA	NA	NA	NA	mRNA Has domain(s) with predicted oxidoreductase activity, role in oxidation-reduction process and mitochondrion localization	0	-1.29532	0.000604842	4.87091	3.43259e-05	456	172	131	132	62	170	441	446	605	273	287	127	39.372	22.531	18.435	14.335	14.036	19.977	59.649	54.604	68.979	33.879	32.579	23.382
B9J08_000286	MAK21	NA	MAK21	NA	mRNA Ortholog(s) have role in ribosomal large subunit assembly, ribosomal large subunit biogenesis and Noc1p-Noc2p complex, nucleolus, preribosome, large subunit precursor localization	0	-1.29335	0.000138679	6.4714	5.58178e-06	1033	434	579	515	217	486	1120	1810	1430	787	745	437	89.191	56.852	81.48	55.929	49.127	57.112	151.489	221.598	163.042	97.666	84.57	80.456
B9J08_002228	NA	NA	NA	NA	mRNA Protein of unknown function	0	-1.289	0.00023428	6.09824	1.04418e-05	1376	446	499	347	135	272	1126	936	1094	482	585	369	118.807	58.424	70.222	37.685	30.563	31.964	152.301	114.594	124.733	59.816	66.407	67.936
B9J08_004798	ARG3	NA	ARG3	NA	mRNA Ortholog(s) have ornithine carbamoyltransferase activity, role in arginine biosynthetic process, arginine biosynthetic process via ornithine, asexual sporulation and cytosol, intracellular, mitochondrial matrix, mitochondrion localization	0	-1.28378	0.00920194	4.4461	0.000979639	551	276	318	368	170	261	112	184	122	76	49	66	47.575	36.155	44.751	39.965	38.486	30.671	15.149	22.527	13.91	9.431	5.562	12.151
B9J08_001531	NA	IFF4	NA	FLO1	mRNA Protein of unknown function	0	-1.27892	0.000392239	4.54448	1.95752e-05	235	219	206	235	111	204	277	168	309	150	108	85	20.29	28.688	28.989	25.521	25.129	23.973	37.466	20.568	35.231	18.615	12.26	15.649
B9J08_005211	NA	NA	ZRG17	NA	mRNA Ortholog(s) have zinc ion transmembrane transporter activity, role in zinc ion transport and endoplasmic reticulum localization	0	-1.27719	0.00133837	5.22712	9.29234e-05	339	304	282	413	159	292	353	641	369	240	247	120	29.27	39.823	39.685	44.852	35.996	34.314	47.746	78.478	42.072	29.784	28.038	22.093
B9J08_003061	NA	NA	NA	NA	tRNA	0	-1.27458	0.00460106	3.51092	0.000419457	160	152	112	132	69	101	136	76	88	45	46	42	13.815	19.911	15.761	14.335	15.621	11.869	18.395	9.305	10.033	5.584	5.222	7.733
B9J08_002449	RIB1	NA	RIB1	NA	mRNA Ortholog(s) have cyclohydrolase activity and role in riboflavin biosynthetic process, riboflavin metabolic process	0	-1.26457	8.66666e-06	6.56199	1.52e-07	1034	774	796	914	371	939	829	1175	1108	503	578	350	89.278	101.39	112.017	99.261	83.991	110.346	112.129	143.855	126.329	62.422	65.612	64.438
B9J08_000993	HFL2	NA	BUR6	NA	mRNA Ortholog(s) have TBP-class protein binding, chromatin binding, transcription coactivator activity, transcription corepressor activity	0	-1.26127	0.00587927	3.86842	0.000571339	101	109	87	107	36	142	162	315	185	109	128	57	8.721	14.278	12.243	11.62	8.15	16.687	21.912	38.565	21.093	13.527	14.53	10.494
B9J08_003205	LYS1	NA	LYS1	NA	mRNA Ortholog(s) have mRNA binding, saccharopine dehydrogenase (NAD+, L-lysine-forming) activity and role in lysine biosynthetic process, lysine biosynthetic process via aminoadipic acid	0	-1.25426	7.62993e-05	6.15226	2.50287e-06	1540	1403	1133	888	524	1139	341	413	547	217	245	138	132.967	183.786	159.442	96.438	118.629	133.849	46.123	50.564	62.366	26.929	27.811	25.407
B9J08_003685	PCD1	NA	PCD1	NA	mRNA Ortholog(s) have 8-oxo-7,8-dihydroguanosine triphosphate pyrophosphatase activity, pyrophosphatase activity, role in DNA repair and peroxisome localization	0	-1.25264	0.00019221	4.5114	8.14315e-06	268	156	168	129	87	178	242	243	418	165	146	102	23.14	20.435	23.642	14.01	19.696	20.918	32.732	29.75	47.658	20.476	16.573	18.779
B9J08_003016	NA	BMT8	NA	NA	mRNA Has domain(s) with predicted mannosyltransferase activity	0	-1.24962	2.41655e-06	7.45076	2.87e-08	3857	3142	2904	2790	1284	2833	826	1024	1197	462	554	392	333.022	411.587	408.666	302.997	290.686	332.918	111.723	125.368	136.476	57.334	62.888	72.171
B9J08_004309	PFK1	NA	PFK1	NA	mRNA Ortholog(s) have 6-phosphofructokinase activity, role in glycolytic process, regulation of intracellular pH and 6-phosphofructokinase complex, mitochondrion localization	0	-1.24254	0.000431624	10.6004	2.24108e-05	17136	10533	10951	11348	5861	7271	16365	30132	19361	11446	11247	7410	1479.56	1379.77	1541.08	1232.4	1326.88	854.446	2213.5	3689.05	2207.45	1420.43	1276.72	1364.25
B9J08_004179	NA	NA	NA	NA	mRNA Ortholog of C. albicans SC5314 : C1_00190C_A, C. dubliniensis CD36 : Cd36_00200, C. parapsilosis CDC317 : CPAR2_109640 and Candida tenuis NRRL Y-1498 : CANTEDRAFT_114399	0	-1.24186	4.34458e-05	3.81875	1.29402e-06	109	76	61	99	27	61	245	222	328	122	160	90	9.411	9.956	8.584	10.751	6.113	7.168	33.138	27.179	37.397	15.14	18.163	16.57
B9J08_004637	NA	NA	NA	NA	mRNA Protein of unknown function	0	-1.23934	1.20062e-06	8.01229	1.06e-08	8185	4388	4283	3253	1508	2985	1574	1421	1848	748	889	627	706.711	574.807	602.726	353.279	341.397	350.78	212.896	173.973	210.7	92.826	100.916	115.436
B9J08_004026	NA	NA	COS111	NA	mRNA Ortholog(s) have role in signal transduction	0	-1.23726	1.40734e-05	8.13016	3e-07	4704	3136	3497	2772	1130	2386	2039	3112	2579	1286	1484	860	406.154	410.801	492.116	301.042	255.822	280.389	275.791	381.002	294.045	159.591	168.458	158.334
B9J08_000874	OSM1	NA	NA	OSM1	mRNA Has domain(s) with predicted succinate dehydrogenase activity and role in oxidation-reduction process	0	-1.23561	4.62057e-06	8.96523	7.75e-08	5674	3944	3600	3088	1493	2763	5544	7956	7308	3821	3860	2208	489.905	516.645	506.611	335.36	338.001	324.692	749.87	974.052	833.223	474.181	438.172	406.512
B9J08_003302	NA	NA	SAN1	NA	mRNA Ortholog(s) have ubiquitin-protein transferase activity and role in nuclear protein quality control by the ubiquitin-proteasome system, response to misfolded protein, ubiquitin-dependent protein catabolic process	0	-1.23427	2.18397e-06	7.81447	2.55e-08	1997	1847	1800	2482	1058	2147	2486	2262	2498	1097	1395	931	172.425	241.948	253.305	269.548	239.521	252.303	336.251	276.936	284.81	136.136	158.355	171.405
B9J08_000029	PCL5	NA	PCL5	NA	mRNA Ortholog(s) have cyclin-dependent protein serine/threonine kinase regulator activity and role in negative regulation of DNA-binding transcription factor activity, negative regulation of macroautophagy, regulation of protein stability	0	-1.23284	1.83532e-06	7.46693	2.07e-08	1672	1425	1282	1720	681	1431	2025	2085	2121	1181	1084	708	144.364	186.668	180.41	186.794	154.172	168.163	273.897	255.266	241.826	146.56	123.051	130.349
B9J08_003267	NA	XYL2	NA	SOR1	mRNA Has domain(s) with predicted oxidoreductase activity, transferase activity, transferring acyl groups other than amino-acyl groups, zinc ion binding activity and role in oxidation-reduction process	0	-1.2239	0.00050798	4.86607	2.77043e-05	396	163	199	263	79	163	397	309	479	235	174	156	34.191	21.352	28.004	28.562	17.885	19.155	53.697	37.831	54.613	29.163	19.752	28.721
B9J08_004738	NA	NA	TFC7	NA	mRNA Ortholog(s) have DNA binding, bending, RNA polymerase III general transcription initiation factor activity and RNA polymerase III type 1 promoter sequence-specific DNA binding, more	0	-1.21851	0.00460106	7.16006	0.000419142	1823	1365	1373	1357	649	1176	1008	2490	1195	965	801	394	157.402	178.809	193.216	147.371	146.928	138.197	136.34	304.85	136.248	119.755	90.926	72.539
B9J08_003887	NA	NA	NA	NA	mRNA Has domain(s) with predicted nucleus localization	0	-1.21412	3.89717e-06	7.6237	6.04e-08	1221	841	960	1051	413	872	3365	4405	4206	2167	2164	1403	105.424	110.167	135.096	114.14	93.499	102.472	455.143	539.303	479.548	268.922	245.649	258.305
B9J08_004535	NA	orf19.3701	NA	NA	mRNA Protein of unknown function	0	-1.21141	0.00126154	4.05105	8.53044e-05	215	136	135	140	35	153	219	190	180	112	90	81	18.564	17.815	18.998	15.204	7.924	17.98	29.622	23.262	20.523	13.899	10.216	14.913
B9J08_005050	NA	NA	KXD1	NA	mRNA Ortholog(s) have role in endosome organization, regulation of protein localization and BLOC-1 complex localization	0	-1.20982	0.00275564	3.28716	0.000222381	131	114	100	105	46	126	71	70	114	42	52	27	11.311	14.933	14.073	11.403	10.414	14.807	9.603	8.57	12.998	5.212	5.903	4.971
B9J08_001223	NA	NA	NA	NA	mRNA Ortholog of C. albicans SC5314 : C2_06160W_A, C. parapsilosis CDC317 : CPAR2_104840, Candida tenuis NRRL Y-1498 : CANTEDRAFT_116070 and Debaryomyces hansenii CBS767 : DEHA2F04994g	0	-1.20642	7.75698e-05	4.32434	2.58174e-06	227	141	133	132	75	165	209	261	286	144	134	85	19.6	18.47	18.716	14.335	16.979	19.39	28.269	31.954	32.608	17.87	15.211	15.649
B9J08_001826	HAC1	NA	HAC1	NA	mRNA Ortholog(s) have DNA-binding transcription factor activity, RNA polymerase II-specific activity	0	-1.20618	0.00456429	5.87115	0.000412718	1173	866	904	939	534	1331	226	465	305	165	148	147	101.279	113.442	127.216	101.976	120.893	156.411	30.568	56.93	34.775	20.476	16.8	27.064
B9J08_003265	PDE2	NA	PDE2	NA	mRNA Ortholog(s) have 3',5'-cyclic-AMP phosphodiesterase activity and role in cAMP-mediated signaling	0	-1.20369	0.0039055	5.58705	0.000341898	499	357	387	343	160	470	358	904	585	311	332	191	43.085	46.765	54.461	37.25	36.223	55.232	48.422	110.677	66.699	38.595	37.687	35.165
B9J08_004515	NA	NA	NA	NA	mRNA Ortholog of C. albicans SC5314 : C1_05440C_A, C. dubliniensis CD36 : Cd36_05170, C. parapsilosis CDC317 : CPAR2_107690, Debaryomyces hansenii CBS767 : DEHA2A02376g and Pichia stipitis Pignal : PICST_28394	0	-1.20254	1.31215e-06	7.79076	1.25e-08	5448	3929	3125	2987	1519	2831	1326	1343	1447	624	879	506	470.392	514.68	439.766	324.391	343.888	332.683	179.352	164.423	164.98	77.438	99.781	93.159
B9J08_000463	NA	NA	VFA1	NA	mRNA Ortholog(s) have ATPase activator activity, role in positive regulation of ATPase activity, vacuolar transport and cytoplasm, endosome localization	0	-1.19772	4.39808e-06	6.32123	7.26e-08	798	621	581	784	313	818	947	696	1049	445	536	315	68.901	81.348	81.761	85.143	70.86	96.127	128.089	85.211	119.602	55.224	60.845	57.994
B9J08_001313	NA	NA	NA	NA	mRNA Ortholog of C. albicans SC5314 : C5_00390C_A, C. dubliniensis CD36 : Cd36_50410, C. parapsilosis CDC317 : CPAR2_304110, Candida albicans WO-1 : CAWG_04433 and Candida metapsilosis : CMET_1104	0	-1.19309	4.21095e-06	8.02049	6.69e-08	2958	2455	2293	1745	958	2067	2838	2349	3835	1394	1690	1200	255.4	321.593	322.683	189.509	216.882	242.902	383.862	287.588	437.248	172.993	191.842	220.931
B9J08_001854	NA	NA	NA	STP2	mRNA Ortholog of C. albicans SC5314 : C6_00800C_A, C. dubliniensis CD36 : Cd36_60750, C. parapsilosis CDC317 : CPAR2_603110 and Candida tenuis NRRL Y-1498 : cten_CGOB_00221	0	-1.19276	4.26296e-06	6.48577	6.86e-08	1098	826	684	792	337	724	1016	747	1238	455	585	394	94.804	108.202	96.256	86.012	76.294	85.08	137.422	91.455	141.151	56.465	66.407	72.539
B9J08_003499	NA	NA	NA	NA	mRNA Ortholog of C. albicans SC5314 : CR_03250C_A, C. dubliniensis CD36 : Cd36_28380, C. parapsilosis CDC317 : CPAR2_802270 and Candida tenuis NRRL Y-1498 : CANTEDRAFT_135624	0	-1.1916	3.14806e-06	8.51546	4.3e-08	5495	2900	2871	3659	1625	2832	3601	3414	4453	2146	2012	1403	474.45	379.886	404.022	397.371	367.885	332.8	487.064	417.975	507.709	266.316	228.394	258.305
B9J08_002986	GLC3	NA	GLC3	NA	mRNA Ortholog(s) have 1,4-alpha-glucan branching enzyme activity and role in glycogen biosynthetic process	0	-1.18809	8.71796e-06	7.64744	1.54e-07	2408	2282	1748	1865	889	2373	1756	1680	2256	920	1139	708	207.912	298.931	245.988	202.541	201.261	278.861	237.513	205.682	257.218	114.171	129.295	130.349
B9J08_005567	SHA3	NA	SKS1	NA	mRNA Ortholog(s) have protein kinase activity, protein serine/threonine kinase activity	0	-1.17994	6.51335e-05	10.2596	2.05369e-06	13762	8567	9673	12679	5441	10172	10177	17153	13595	7225	7116	5236	1188.24	1122.24	1361.23	1376.95	1231.79	1195.35	1376.52	2100.04	1550.04	896.612	807.781	963.994
B9J08_000274	ENO1	NA	ENO1	NA	mRNA Ortholog(s) have melatonin binding, phosphopyruvate hydratase activity and role in carbon utilization, glycolytic process, regulation of vacuole fusion, non-autophagic	0	-1.17937	0.00079481	12.5922	4.8306e-05	91549	51969	46034	61875	30959	64798	44012	87184	54585	37409	33174	19305	7904.54	6807.69	6478.15	6719.68	7008.83	7614.68	5952.98	10673.9	6223.52	4642.4	3765.78	3554.22
B9J08_002958	NA	orf19.6874	NA	NA	mRNA Protein of unknown function	0	-1.17885	0.000198558	7.62098	8.51133e-06	2782	1814	1702	1389	746	1378	1709	2982	2043	1333	1262	697	240.204	237.625	239.514	150.847	168.888	161.935	231.156	365.086	232.933	165.423	143.257	128.324
B9J08_001532	NA	VPS70	NA	VPS70	mRNA Has domain(s) with predicted peptidase activity and role in proteolysis	0	-1.17463	2.37317e-05	7.35701	6.21e-07	1043	662	824	789	306	575	3823	2658	4212	1559	2045	1543	90.055	86.719	115.958	85.686	69.276	67.571	517.091	325.418	480.232	193.47	232.14	284.08
B9J08_001440	NA	NA	NA	NA	mRNA Ortholog of C. albicans SC5314 : C6_03370W_A, C. dubliniensis CD36 : Cd36_63630, C. parapsilosis CDC317 : CPAR2_600930, Debaryomyces hansenii CBS767 : DEHA2E19470g and Pichia stipitis Pignal : PICST_32880	0	-1.16191	3.52603e-05	8.88144	1.02183e-06	2241	1387	1628	1857	626	1120	11865	14921	14833	7301	8508	4988	193.493	181.69	229.101	201.672	141.721	131.616	1604.84	1826.78	1691.19	906.044	965.795	918.335
B9J08_002230	CBF1	NA	CBF1	NA	mRNA Ortholog(s) have DNA-binding transcription activator activity, RNA polymerase II-specific, DNA-binding transcription repressor activity and RNA polymerase II-specific, more	0	-1.15548	6.83891e-05	5.0391	2.1834e-06	152	179	175	256	131	217	471	429	643	269	315	181	13.124	23.448	24.627	27.802	29.657	25.501	63.707	52.522	73.312	33.383	35.758	33.324
B9J08_002141	NA	NA	NA	NA	mRNA Ortholog of C. albicans SC5314 : C7_01380W_A, C. dubliniensis CD36 : Cd36_71210, C. parapsilosis CDC317 : CPAR2_702710 and Candida tenuis NRRL Y-1498 : CANTEDRAFT_116256	0	-1.14949	0.00799399	6.90333	0.0008253	3001	3594	2928	2824	1293	3870	333	560	438	174	256	234	259.113	470.797	412.043	306.689	292.723	454.78	45.041	68.561	49.939	21.593	29.06	43.081
B9J08_005226	GLK1	NA	GLK1	NA	mRNA Ortholog(s) have glucokinase activity and role in glucose import, glucose metabolic process, glycolytic process, mannose metabolic process	0	-1.14907	3.21096e-06	11.1173	4.52e-08	19143	14846	14740	15122	7107	15867	25514	32485	32861	16289	17500	11558	1652.85	1944.76	2074.29	1642.26	1608.96	1864.6	3450.97	3977.13	3746.65	2021.44	1986.53	2127.93
B9J08_004750	NA	NA	NA	NA	mRNA Ortholog of C. albicans SC5314 : C3_07030C_A, C. dubliniensis CD36 : Cd36_86960, C. parapsilosis CDC317 : CPAR2_808800 and Candida tenuis NRRL Y-1498 : CANTEDRAFT_113621	0	-1.14128	9.23826e-05	5.09534	3.25322e-06	444	290	232	306	129	282	289	363	485	192	206	165	38.336	37.989	32.648	33.232	29.204	33.139	39.09	44.442	55.297	23.827	23.384	30.378
B9J08_003227	WAR1	NA	WAR1	NA	mRNA Ortholog(s) have sequence-specific DNA binding activity, role in positive regulation of transcription from RNA polymerase II promoter in response to acidic pH and nucleus localization	0	-1.13854	0.000101635	5.79751	3.70569e-06	520	414	451	414	203	593	717	512	687	355	354	250	44.898	54.232	63.467	44.961	45.957	69.686	96.98	62.684	78.328	44.055	40.185	46.027
B9J08_002249	NA	orf19.4779	NA	VBA5	mRNA Has domain(s) with predicted transmembrane transporter activity, role in transmembrane transport and integral component of membrane localization	0	-1.13143	0.00247032	6.28232	0.00019568	905	1134	867	1348	632	1110	379	689	547	248	322	226	78.14	148.549	122.009	146.394	143.079	130.441	51.263	84.354	62.366	30.776	36.552	41.609
B9J08_000122	NA	NA	NA	APJ1	mRNA Has domain(s) with predicted heat shock protein binding, unfolded protein binding activity	0	-1.12589	3.35366e-06	6.07324	4.93e-08	716	524	433	648	261	642	719	715	798	403	420	311	61.821	68.642	60.934	70.373	59.088	75.444	97.251	87.537	90.984	50.012	47.677	57.258
B9J08_002762	INO1	NA	INO1	NA	mRNA Ortholog(s) have inositol-3-phosphate synthase activity, role in inositol biosynthetic process and intracellular localization	0	-1.12463	0.00126697	7.94806	8.64368e-05	13453	9813	9911	9106	4377	9139	542	619	561	189	400	334	1161.56	1285.46	1394.73	988.92	990.912	1073.96	73.31	75.784	63.962	23.455	45.406	61.492
B9J08_000007	NA	orf19.5711	NA	CSR1	mRNA Ortholog of Candida lusitaniae ATCC 42720 : CLUG_01211	0	-1.12281	0.000186699	4.57922	7.77757e-06	300	208	211	224	80	206	272	183	313	129	166	92	25.903	27.247	29.693	24.327	18.111	24.208	36.79	22.405	35.687	16.009	18.844	16.938
B9J08_002305	NA	NA	NA	NA	mRNA Ortholog of C. albicans SC5314 : C1_09340C_A, C. dubliniensis CD36 : Cd36_08810, C. parapsilosis CDC317 : CPAR2_207520 and Candida tenuis NRRL Y-1498 : CANTEDRAFT_96026	0	-1.11917	1.57348e-05	7.71941	3.48e-07	3129	1612	1861	2183	911	1450	2022	1935	2521	1147	1249	888	270.165	211.164	261.89	237.076	206.242	170.396	273.492	236.902	287.432	142.341	141.782	163.489
B9J08_004858	NA	NA	NA	TGL5	mRNA Ortholog(s) have triglyceride lipase activity, role in cellular detoxification, triglyceride mobilization and lipid droplet localization	0	-1.11493	0.00363983	2.98809	0.000314246	87	63	51	67	26	65	104	65	117	61	56	29	7.512	8.253	7.177	7.276	5.886	7.638	14.067	7.958	13.34	7.57	6.357	5.339
B9J08_002463	NA	NA	NA	VPS70	mRNA Ortholog of C. albicans SC5314 : C1_04700C_A, C. dubliniensis CD36 : Cd36_04450, C. parapsilosis CDC317 : CPAR2_105460, Debaryomyces hansenii CBS767 : DEHA2D07128g and Pichia stipitis Pignal : PICST_80203	0	-1.11181	0.00691906	4.21052	0.000703185	302	153	216	159	102	205	120	175	179	81	74	92	26.075	20.042	30.397	17.268	23.092	24.09	16.231	21.425	20.409	10.052	8.4	16.938
B9J08_003969	NA	DAD1	NA	DAD1	mRNA Has domain(s) with predicted role in mitotic spindle organization and DASH complex, mitotic spindle localization	0	-1.11179	0.00139465	4.72792	9.82348e-05	365	125	133	218	70	106	398	360	445	221	248	150	31.515	16.374	18.716	23.675	15.847	12.457	53.833	44.075	50.737	27.426	28.152	27.616
B9J08_000360	SYN8	NA	SYN8	NA	mRNA Ortholog(s) have SNAP receptor activity, role in Golgi to vacuole transport and endosome localization	0	-1.10844	1.28364e-05	5.33381	2.57e-07	662	436	386	400	162	356	372	323	404	183	229	154	57.159	57.114	54.32	43.44	36.675	41.835	50.316	39.545	46.062	22.71	25.995	28.353
B9J08_001969	NA	NA	NA	NA	mRNA Ortholog of C. albicans SC5314 : CR_04860C_A, C. dubliniensis CD36 : Cd36_30250, Candida tenuis NRRL Y-1498 : CANTEDRAFT_98619 and Debaryomyces hansenii CBS767 : DEHA2G22594g	0	-1.10775	0.000479872	6.26505	2.55919e-05	1294	555	591	751	379	687	632	914	729	420	489	262	111.727	72.702	83.169	81.559	85.802	80.732	85.483	111.901	83.117	52.121	55.509	48.237
B9J08_002868	NA	NA	ITT1	NA	mRNA Ortholog(s) have role in regulation of translational termination	0	-1.10562	9.49933e-05	6.15964	3.40286e-06	683	560	515	771	245	523	885	631	981	375	551	355	58.972	73.357	72.473	83.731	55.466	61.46	119.703	77.253	111.849	46.537	62.547	65.359
B9J08_003214	NA	NA	TDA6	NA	mRNA Ortholog of S. cerevisiae : TDA6, C. albicans SC5314 : C4_05440C_A, C. dubliniensis CD36 : Cd36_45100, C. parapsilosis CDC317 : CPAR2_500960 and Candida tenuis NRRL Y-1498 : CANTEDRAFT_113515	0	-1.10324	2.51879e-06	8.49242	3.23e-08	6506	4830	4411	4270	2280	4604	2221	2424	2963	1235	1526	1129	561.742	632.707	620.739	463.726	516.171	541.035	300.408	296.77	337.827	153.262	173.226	207.859
B9J08_003355	ATG1	NA	ATG1	NA	mRNA Ortholog(s) have protein serine/threonine kinase activity	0	-1.0999	0.000190348	5.69815	8.00619e-06	592	618	557	676	346	689	367	350	491	214	284	133	51.115	80.955	78.384	73.414	78.331	80.967	49.64	42.85	55.981	26.557	32.239	24.486
B9J08_003441	NA	KSP1	FMP48	NA	mRNA Has domain(s) with predicted ATP binding, protein kinase activity, protein tyrosine kinase activity and role in protein phosphorylation	0	-1.09594	4.56876e-05	8.91902	1.36998e-06	7000	3559	3633	5655	2068	3433	5044	4320	5612	2875	2931	1959	604.395	466.212	511.255	614.138	468.176	403.426	682.241	528.897	639.853	356.783	332.716	360.669
B9J08_001083	NA	NA	SLX8	NA	mRNA Ortholog(s) have ubiquitin-protein transferase activity and role in cellular response to DNA damage stimulus, protein sumoylation, protein ubiquitination, telomere maintenance	0	-1.08545	0.00051213	6.68108	2.81367e-05	1501	1005	915	1091	457	1038	752	1270	821	568	527	358	129.6	131.65	128.764	118.484	103.461	121.98	101.714	155.486	93.606	70.488	59.823	65.911
B9J08_004167	NA	NA	AZF1	NA	mRNA Ortholog(s) have DNA-binding transcription activator activity, RNA polymerase II-specific, RNA polymerase II cis-regulatory region sequence-specific DNA binding activity	0	-1.08191	2.18814e-05	7.60622	5.59e-07	2129	1142	1140	1351	751	1038	2627	2297	2993	1292	1750	1111	183.822	149.597	160.427	146.72	170.019	121.98	355.323	281.221	341.247	160.335	198.653	204.545
B9J08_002219	MIG1	NA	MIG1	NA	mRNA Ortholog(s) have DNA-binding transcription repressor activity, RNA polymerase II-specific, RNA polymerase II cis-regulatory region sequence-specific DNA binding, transcription regulatory region DNA binding activity	0	-1.07214	4.76206e-05	6.89044	1.43753e-06	1881	1081	1109	1413	576	979	903	1185	1086	582	667	423	162.41	141.606	156.064	153.453	130.401	115.046	122.138	145.079	123.82	72.225	75.715	77.878
B9J08_005280	NA	NA	NA	SKY1	mRNA Has domain(s) with predicted ATP binding, protein kinase activity, protein tyrosine kinase activity and role in protein phosphorylation	0	-1.06257	0.000237458	6.86906	1.06567e-05	1272	1005	837	959	413	975	1524	876	1625	610	815	644	109.827	131.65	117.787	104.148	93.499	114.576	206.133	107.249	185.275	75.7	92.516	118.566
B9J08_004507	NA	NA	FMS1	NA	mRNA Ortholog(s) have polyamine oxidase activity and role in pantothenate biosynthetic process, spermine catabolic process	0	-1.06044	9.81914e-06	6.71244	1.86e-07	960	603	663	625	307	578	1317	1716	1573	858	987	608	82.888	78.99	93.301	67.876	69.502	67.923	178.135	210.09	179.346	106.477	112.04	111.938
B9J08_003181	NA	NA	NA	NA	mRNA Protein of unknown function	0	-1.06017	0.00191829	4.83802	0.000148244	118	168	114	207	116	289	490	318	468	192	259	227	10.188	22.007	16.043	22.48	26.261	33.962	66.276	38.933	53.359	23.827	29.401	41.793
B9J08_004638	OFI1	NA	NA	CRZ1	mRNA Has domain(s) with predicted nucleic acid binding activity	0	-1.05705	3.37065e-05	7.25933	9.56e-07	2469	1640	1776	1841	942	1513	931	1292	1356	609	765	515	213.179	214.832	249.928	199.934	213.26	177.799	125.925	158.179	154.605	75.576	86.84	94.816
B9J08_000017	NA	NA	LDH1	NA	mRNA Ortholog(s) have hydrolase activity, acting on ester bonds, triglyceride lipase activity, role in lipid homeostasis and lipid droplet localization	0	-1.05059	0.00234781	3.48834	0.000185216	159	77	89	103	36	79	116	99	159	76	70	53	13.728	10.087	12.525	11.186	8.15	9.284	15.69	12.121	18.128	9.431	7.946	9.758
B9J08_005075	UCF1	NA	RGI1	NA	mRNA Ortholog(s) have role in energy reserve metabolic process and cell periphery localization	0	-1.04905	6.83891e-05	12.366	2.19346e-06	30380	23029	22298	32863	10113	24681	90224	105273	109869	60347	66337	38901	2623.07	3016.69	3137.89	3568.95	2289.49	2900.37	12203.5	12888.6	12526.7	7488.98	7530.32	7162.02
B9J08_002953	SPO72	NA	ATG2	NA	mRNA Ortholog(s) have phosphatidylinositol-3-phosphate binding activity	0	-1.04798	0.00490403	3.58233	0.000453985	158	83	83	100	47	93	111	102	191	93	64	59	13.642	10.873	11.68	10.86	10.64	10.929	15.014	12.488	21.777	11.541	7.265	10.862
B9J08_001533	NA	ALD5	NA	ALD4	mRNA Has domain(s) with predicted oxidoreductase activity, oxidoreductase activity, acting on the aldehyde or oxo group of donors, NAD or NADP as acceptor activity and role in oxidation-reduction process	0	-1.03435	0.00357946	5.56802	0.000307593	524	394	374	534	276	745	263	513	495	235	273	156	45.243	51.612	52.631	57.993	62.484	87.548	35.573	62.806	56.437	29.163	30.99	28.721
B9J08_004136	NA	NA	NA	NA	mRNA Ortholog of C. parapsilosis CDC317 : CPAR2_801620, Candida tenuis NRRL Y-1498 : CANTEDRAFT_133724, Debaryomyces hansenii CBS767 : DEHA2E14322g and Pichia stipitis Pignal : PICST_29092	0	-1.023	0.00040119	4.79433	2.02654e-05	332	208	142	212	68	168	376	367	363	236	240	133	28.666	27.247	19.983	23.023	15.395	19.742	50.857	44.932	41.387	29.287	27.244	24.486
B9J08_001556	NA	NA	NA	NA	mRNA Ortholog of C. albicans SC5314 : CR_02270C_A, C. dubliniensis CD36 : Cd36_27240, C. parapsilosis CDC317 : CPAR2_801310 and Candida tenuis NRRL Y-1498 : CANTEDRAFT_113199	0	-1.01883	0.000641918	7.64143	3.68176e-05	4715	2926	3148	2763	1415	2053	907	1583	1245	691	756	545	407.103	383.292	443.003	300.064	320.343	241.257	122.679	193.806	141.949	85.752	85.818	100.339
B9J08_004854	NA	NA	NA	FRA1	mRNA Has domain(s) with predicted hydrolase activity and role in cellular process	0	-1.01734	0.00144762	6.06269	0.000103131	691	600	499	576	210	442	525	1029	832	465	508	297	59.662	78.597	70.222	62.554	47.542	51.941	71.01	125.98	94.861	57.706	57.666	54.68
B9J08_003318	NA	NA	NA	NA	mRNA Ortholog of C. albicans SC5314 : C1_14180W_A, C. dubliniensis CD36 : Cd36_13150, C. parapsilosis CDC317 : CPAR2_700610 and Candida tenuis NRRL Y-1498 : CANTEDRAFT_135418	0	-1.01273	0.000597253	5.50903	3.3775e-05	680	423	370	437	176	397	333	545	455	267	283	171	58.713	55.411	52.068	47.459	39.845	46.653	45.041	66.724	51.877	33.134	32.125	31.483
B9J08_004785	NA	NA	FPK1	NA	mRNA Ortholog(s) have protein kinase activity, protein serine/threonine kinase activity	0	-0.999333	0.000312247	5.66337	1.483e-05	603	412	484	441	208	317	438	626	541	314	347	222	52.064	53.97	68.111	47.893	47.089	37.252	59.243	76.641	61.682	38.967	39.39	40.872
B9J08_003474	NA	NA	NA	NA	mRNA Has domain(s) with predicted role in mRNA cleavage, tRNA processing and nucleolar ribonuclease P complex, ribonuclease MRP complex localization	0	-0.99917	0.000926175	5.11089	5.79675e-05	382	223	236	252	93	257	324	544	456	247	302	173	32.983	29.212	33.211	27.367	21.054	30.201	43.824	66.602	51.991	30.652	34.282	31.851
B9J08_003623	SSY1	NA	SSY1	NA	mRNA Ortholog(s) have role in response to amino acid and plasma membrane localization	0	-0.998754	0.000419968	5.52386	2.16365e-05	601	398	390	512	229	489	361	500	377	271	260	153	51.892	52.136	54.883	55.604	51.843	57.464	48.828	61.215	42.984	33.631	29.514	28.169
B9J08_000959	NA	NA	NA	NA	mRNA Ortholog of C. albicans SC5314 : C1_02370C_A, C. dubliniensis CD36 : Cd36_02210, C. parapsilosis CDC317 : CPAR2_106350 and Candida tenuis NRRL Y-1498 : CANTEDRAFT_116785	0	-0.997535	2.08451e-05	6.50639	5.17e-07	1334	912	1093	990	512	920	730	587	860	403	488	312	115.18	119.468	153.813	107.515	115.912	108.113	98.738	71.866	98.053	50.012	55.396	57.442
B9J08_004622	NA	orf19.2498	NA	SAN1	mRNA Has domain(s) with predicted zinc ion binding activity	0	-0.992096	3.78641e-05	6.00086	1.12015e-06	848	662	657	882	459	781	432	448	537	242	357	199	73.218	86.719	92.456	95.786	103.913	91.779	58.431	54.849	61.226	30.032	40.525	36.638
B9J08_001853	NA	NA	FMP52	NA	mRNA Ortholog of S. cerevisiae : FMP52, C. albicans SC5314 : C1_10280C_A, C. glabrata CBS138 : CAGL0H09768g, C. dubliniensis CD36 : Cd36_09680 and C. parapsilosis CDC317 : CPAR2_804800	0	-0.989151	1.53117e-05	9.08062	3.36e-07	7278	6086	4572	5440	2268	5083	5202	3850	5726	2721	3410	2082	628.398	797.237	643.396	590.789	513.454	597.325	703.612	471.355	652.851	337.672	387.09	383.315
B9J08_002169	SUC1	NA	MAL13	NA	mRNA Ortholog(s) have role in cellular carbohydrate metabolic process	0	-0.987218	0.00161953	3.10143	0.000118311	38	49	33	28	24	30	179	168	191	104	142	60	3.281	6.419	4.644	3.041	5.433	3.525	24.211	20.568	21.777	12.906	16.119	11.047
B9J08_003683	NA	NA	NA	NA	mRNA Ortholog of C. albicans SC5314 : C6_02020C_A, C. dubliniensis CD36 : Cd36_62150, C. parapsilosis CDC317 : CPAR2_601780 and Candida tenuis NRRL Y-1498 : CANTEDRAFT_92389	0	-0.986491	0.00564263	3.39179	0.000543823	155	77	105	89	43	73	90	87	139	65	63	47	13.383	10.087	14.776	9.665	9.735	8.579	12.173	10.651	15.848	8.066	7.152	8.653
B9J08_005198	RGS2	NA	RGS2	NA	mRNA Ortholog(s) have GTPase activator activity and role in adenylate cyclase-modulating G protein-coupled receptor signaling pathway	0	-0.983725	0.000374526	6.97619	1.84663e-05	1590	718	882	766	233	481	1811	1632	2336	1191	1333	738	137.284	94.055	124.12	83.188	52.749	56.524	244.952	199.805	266.339	147.801	151.317	135.872
B9J08_000457	NA	NA	YMR295C	NA	mRNA Ortholog of S. cerevisiae : YMR295C, C. albicans SC5314 : C4_06470W_A, C. glabrata CBS138 : CAGL0M13629g, C. dubliniensis CD36 : Cd36_45960 and C. parapsilosis CDC317 : CPAR2_501070	0	-0.982016	0.000644963	9.53494	3.72518e-05	26788	12581	12580	9727	5084	8491	3187	4969	4013	2414	2422	1862	2312.93	1648.05	1770.32	1056.36	1150.97	997.813	431.067	608.354	457.543	299.574	274.936	342.811
B9J08_001025	GSY1	NA	GSY1	NA	mRNA Ortholog(s) have glycogen (starch) synthase activity and role in glycogen biosynthetic process	0	-0.980453	0.000121478	8.88094	4.74274e-06	5377	2897	3140	3410	1384	2519	5505	7029	5974	4032	3900	2528	464.262	379.493	441.877	370.329	313.325	296.018	744.595	860.559	681.126	500.365	442.713	465.427
B9J08_001307	NA	NA	CSF1	NA	mRNA Ortholog(s) have role in fermentation, protein maturation	0	-0.979977	0.00732883	3.10373	0.000752204	97	51	55	85	31	48	103	91	109	64	54	54	8.375	6.681	7.74	9.231	7.018	5.641	13.932	11.141	12.428	7.942	6.13	9.942
B9J08_001350	NA	NA	NA	NA	mRNA Ortholog of C. albicans SC5314 : C1_14520W_A, C. dubliniensis CD36 : Cd36_70220, C. parapsilosis CDC317 : CPAR2_808740 and Candida tenuis NRRL Y-1498 : CANTEDRAFT_95761	0	-0.97921	0.000343523	4.5485	1.6592e-05	178	150	114	131	62	96	337	366	431	294	207	150	15.369	19.649	16.043	14.227	14.036	11.281	45.582	44.809	49.141	36.485	23.498	27.616
B9J08_004316	NA	NA	HUA1	NA	mRNA Ortholog(s) have cytoplasm localization	0	-0.978303	1.97665e-06	6.79578	2.27e-08	933	621	666	762	349	713	1463	1438	1670	867	1035	676	80.557	81.348	93.723	82.754	79.01	83.788	197.882	176.054	190.405	107.593	117.489	124.458
B9J08_000384	NA	PHR2	NA	GAS1	mRNA Ortholog(s) have 1,3-beta-glucanosyltransferase activity, role in fungal-type cell wall (1->3)-beta-D-glucan biosynthetic process and cell division site, fungal-type cell wall, new growing cell tip, old growing cell tip localization	0	-0.977002	4.29612e-06	9.70892	7e-08	19851	13739	11380	10800	6041	11916	4404	4569	5570	2958	3313	1976	1713.98	1799.74	1601.45	1172.89	1367.63	1400.3	595.676	559.382	635.064	367.084	376.079	363.799
B9J08_004939	NA	NA	ATG3	NA	mRNA Ortholog(s) have Atg8 ligase activity	0	-0.9751	8.67703e-05	7.20247	2.98606e-06	2009	1196	1225	1346	541	958	1709	1132	1854	956	964	678	173.461	156.67	172.388	146.177	122.477	112.579	231.156	138.591	211.384	118.638	109.43	124.826
B9J08_005394	NA	NA	NA	NA	mRNA Ortholog of Candida tenuis NRRL Y-1498 : CANTEDRAFT_115648, Debaryomyces hansenii CBS767 : DEHA2E18194g, Pichia stipitis Pignal : PICST_37102 and Candida guilliermondii ATCC 6260 : PGUG_01260	0	-0.968336	0.000388672	5.74282	1.92419e-05	746	563	532	507	276	527	423	354	592	216	301	256	64.411	73.75	74.866	55.061	62.484	61.93	57.214	43.34	67.497	26.805	34.168	47.132
B9J08_004658	UBC8	NA	UBC8	NA	mRNA Ortholog(s) have ubiquitin-protein transferase activity and role in negative regulation of gluconeogenesis, proteasome-mediated ubiquitin-dependent protein catabolic process, ubiquitin-dependent protein catabolic process	0	-0.965782	1.37382e-05	8.13835	2.88e-07	4926	2887	2630	3111	1401	2574	2069	2343	2523	1341	1678	960	425.322	378.183	370.107	337.858	317.173	302.481	279.849	286.853	287.66	166.416	190.48	176.745
B9J08_003368	HHT2	NA	HHT2	NA	mRNA Ortholog(s) have role in cellular response to DNA damage stimulus, global genome nucleotide-excision repair, rRNA transcription and regulation of extent of heterochromatin assembly, more	0	-0.964002	1.5264e-05	9.33322	3.29e-07	6230	3694	3520	4005	1815	3963	8991	7227	11476	5117	6422	4023	537.912	483.896	495.353	434.947	410.899	465.709	1216.11	884.8	1308.44	635.012	729	740.67
B9J08_002039	NA	NA	POF1	NA	mRNA Ortholog(s) have ATPase activity, nicotinamide-nucleotide adenylyltransferase activity	0	-0.960888	1.28364e-05	7.32863	2.59e-07	2042	1232	1040	1094	559	973	2011	1689	2025	1197	1271	807	176.311	161.386	146.354	118.809	126.552	114.341	272.004	206.784	230.881	148.546	144.279	148.576
B9J08_002660	HGT17	NA	NA	HXT8	mRNA Has domain(s) with predicted transmembrane transporter activity, role in transmembrane transport and integral component of membrane, membrane localization	0	-0.957695	1.85529e-05	5.16703	4.51e-07	71	43	42	39	33	32	2152	2087	3151	1361	1715	1092	6.13	5.633	5.91	4.235	7.471	3.76	291.075	255.511	359.262	168.898	194.68	201.047
B9J08_002445	NA	NA	RTK1	NA	mRNA Ortholog(s) have cell periphery, cellular bud neck localization	0	-0.957021	0.000207104	6.61177	8.99355e-06	1212	834	910	1099	464	840	719	1051	915	578	571	375	104.647	109.25	128.06	119.352	105.045	98.712	97.251	128.674	104.324	71.729	64.818	69.041
B9J08_001887	HEM1	NA	HEM1	NA	mRNA Ortholog(s) have 5-aminolevulinate synthase activity, role in heme biosynthetic process, positive regulation of organelle assembly and mitochondrial matrix localization	0	-0.956925	7.10224e-05	7.70546	2.31548e-06	2708	1890	1607	2472	1179	2543	1523	2005	1724	1176	1163	689	233.815	247.581	226.145	268.462	266.915	298.839	205.998	245.472	196.562	145.94	132.019	126.851
B9J08_001196	NA	CSA1	NA	NA	mRNA Protein of unknown function	0	-0.955225	0.000647019	8.1622	3.77612e-05	5818	6036	5211	10132	3640	10112	1054	1006	984	521	744	489	502.339	790.687	733.319	1100.35	824.062	1188.3	142.562	123.164	112.191	64.655	84.456	90.029
B9J08_005081	AUT7	NA	ATG8	NA	mRNA Ortholog(s) have phosphatidylethanolamine binding, protein tag activity	0	-0.952944	0.0010115	8.19324	6.43255e-05	13762	5756	5160	3000	1416	2161	1715	1502	1963	914	1247	809	1188.24	754.009	726.142	325.803	320.569	253.948	231.968	183.89	223.812	113.426	141.555	148.944
B9J08_004305	NA	NA	YGR237C	NA	mRNA Ortholog of S. cerevisiae : YGR237C, C. albicans SC5314 : C5_04960W_A, C. glabrata CBS138 : CAGL0F07975g, C. dubliniensis CD36 : Cd36_54560 and C. parapsilosis CDC317 : CPAR2_101510	0	-0.950616	0.00138183	6.68075	9.70532e-05	1038	526	833	656	223	401	1395	1246	2005	772	1078	773	89.623	68.903	117.224	71.242	50.485	47.123	188.685	152.548	228.6	95.804	122.37	142.316
B9J08_000014	NA	NA	NA	NA	mRNA Ortholog of C. albicans SC5314 : C1_04350C_A, C. dubliniensis CD36 : Cd36_04100, C. parapsilosis CDC317 : CPAR2_105150, Debaryomyces hansenii CBS767 : DEHA2D13200g and Pichia stipitis Pignal : PICST_32772	0	-0.948252	0.000647019	6.98643	3.76524e-05	1819	1384	1164	1396	547	1108	828	1313	1192	806	644	457	157.056	181.297	163.804	151.607	123.836	130.206	111.994	160.75	135.906	100.023	73.104	84.138
B9J08_002370	MED7	NA	MED7	NA	mRNA Ortholog(s) have transcription coactivator activity and role in negative regulation of transcription by RNA polymerase II, positive regulation of transcription by RNA polymerase II	0	-0.947782	0.00141809	5.6716	0.000100171	345	375	335	386	184	403	473	773	671	391	441	256	29.788	49.123	47.143	41.92	41.656	47.358	63.977	94.638	76.504	48.523	50.061	47.132
B9J08_001364	NA	NA	NA	NA	mRNA Has domain(s) with predicted electron transfer activity, heme binding, iron ion binding, monooxygenase activity, oxidoreductase activity, acting on paired donors, with incorporation or reduction of molecular oxygen activity	0	-0.942807	8.65858e-05	7.52366	2.96228e-06	3453	2307	2235	3083	1167	1976	1255	1073	1244	663	803	590	298.14	302.206	314.521	334.817	264.198	232.208	169.749	131.367	141.835	82.277	91.153	108.624
B9J08_003885	MIT1	NA	SUR1	NA	mRNA Ortholog(s) have mannosyltransferase activity	0	-0.941295	1.53091e-05	8.07165	3.33e-07	3466	3087	2663	3207	1617	3476	2056	1942	2045	1191	1458	874	299.262	404.382	374.751	348.283	366.074	408.479	278.09	237.759	233.161	147.801	165.506	160.911
B9J08_003229	SKO1	NA	SKO1	NA	mRNA Ortholog(s) have DNA-binding transcription activator activity, RNA polymerase II-specific, DNA-binding transcription factor activity and RNA polymerase II-specific, more	0	-0.940913	6.51335e-05	5.84607	2.05326e-06	543	467	400	504	251	582	612	503	665	408	392	235	46.884	61.175	56.29	54.735	56.824	68.393	82.778	61.582	75.82	50.632	44.498	43.266
B9J08_002688	FDH1	NA	FDH1	NA	mRNA Ortholog(s) have formate dehydrogenase (NAD+) activity, role in formate catabolic process and cytosol, extracellular region, intracellular localization	0	-0.936858	0.0052451	4.663	0.00049717	766	696	587	306	111	232	126	126	157	68	99	72	66.138	91.173	82.606	33.232	25.129	27.263	17.043	15.426	17.9	8.439	11.238	13.256
B9J08_000684	NA	NA	VHR1	NA	mRNA Ortholog(s) have DNA-binding transcription factor activity, RNA polymerase II-specific, RNA polymerase II transcription regulatory region sequence-specific DNA binding activity	0	-0.929708	0.00408987	6.10567	0.00036133	793	326	364	519	179	275	886	1219	974	661	738	404	68.469	42.704	51.224	56.364	40.524	32.316	119.839	149.242	111.051	82.029	83.775	74.38
B9J08_001700	NA	NA	NA	NA	mRNA Ortholog of C. albicans SC5314 : CR_05770W_A, C. dubliniensis CD36 : Cd36_31170, C. parapsilosis CDC317 : CPAR2_205340 and Candida tenuis NRRL Y-1498 : CANTEDRAFT_133521	0	-0.929054	0.000804332	4.31286	4.90466e-05	191	172	145	217	97	197	211	148	211	116	134	80	16.491	22.531	20.405	23.566	21.96	23.15	28.539	18.12	24.057	14.395	15.211	14.729
B9J08_004205	NA	NA	NA	NA	mRNA Ortholog of C. albicans SC5314 : C4_04140W_A, C. dubliniensis CD36 : Cd36_43730, C. parapsilosis CDC317 : CPAR2_401990 and Candida tenuis NRRL Y-1498 : CANTEDRAFT_116595	0	-0.925631	0.000646442	6.37496	3.74674e-05	1219	623	663	571	251	565	694	1104	1012	591	622	404	105.251	81.61	93.301	62.011	56.824	66.396	93.869	135.163	115.383	73.342	70.607	74.38
B9J08_000814	GYP8	NA	GYP8	NA	mRNA Ortholog(s) have GTPase activator activity, role in vesicle-mediated transport and cytoplasm localization	0	-0.918615	9.18484e-06	6.13084	1.68e-07	902	646	600	582	238	529	684	652	783	427	478	337	77.881	84.623	84.435	63.206	53.881	62.165	92.516	79.824	89.274	52.99	54.261	62.045
B9J08_000939	ZCF5	NA	NA	UGA3	mRNA Has domain(s) with predicted DNA binding, DNA-binding transcription factor activity, RNA polymerase II-specific, zinc ion binding activity and role in regulation of transcription, DNA-templated, transcription, DNA-templated	0	-0.915181	5.61123e-05	5.53156	1.71646e-06	407	227	282	339	128	253	634	597	722	434	437	282	35.141	29.736	39.685	36.816	28.978	29.731	85.754	73.091	82.319	53.859	49.607	51.919
B9J08_005172	NA	QDR3	NA	QDR3	mRNA Has domain(s) with predicted transmembrane transporter activity, role in transmembrane transport and integral component of membrane localization	0	-0.908942	0.000187943	4.75104	7.86719e-06	294	197	156	250	96	218	299	261	327	189	192	143	25.385	25.806	21.953	27.15	21.734	25.618	40.442	31.954	37.283	23.455	21.795	26.328
B9J08_001011	NA	NA	NA	NA	mRNA Ortholog of C. albicans SC5314 : C2_09820W_A, C. dubliniensis CD36 : Cd36_23910, C. parapsilosis CDC317 : CPAR2_407320, Debaryomyces hansenii CBS767 : DEHA2B05676g and Pichia stipitis Pignal : PICST_31664	0	-0.905439	0.000455967	5.13817	2.3929e-05	333	276	220	381	109	297	368	332	456	224	274	185	28.752	36.155	30.96	41.377	24.677	34.902	49.775	40.647	51.991	27.798	31.103	34.06
B9J08_000409	MET13	NA	MET13	NA	mRNA Ortholog(s) have methylenetetrahydrofolate reductase (NAD(P)H) activity and role in methionine biosynthetic process, one-carbon metabolic process	0	-0.905116	2.45098e-05	6.77669	6.51e-07	917	640	695	926	398	948	1180	1349	1356	838	893	578	79.176	83.837	97.804	100.564	90.104	111.403	159.604	165.158	154.605	103.995	101.37	106.415
B9J08_001685	NA	NA	NA	NA	mRNA Ortholog of C. albicans SC5314 : C1_01630W_A, C. dubliniensis CD36 : Cd36_01500, C. parapsilosis CDC317 : CPAR2_109400 and Candida tenuis NRRL Y-1498 : CANTEDRAFT_115006	0	-0.90366	7.75698e-05	6.96384	2.607e-06	1023	838	860	972	437	993	1580	1124	1782	909	978	722	88.328	109.774	121.024	105.56	98.933	116.692	213.708	137.611	203.175	112.806	111.019	132.927
B9J08_002381	OPI3	NA	OPI3	NA	mRNA Ortholog(s) have phosphatidyl-N-dimethylethanolamine N-methyltransferase activity, phosphatidyl-N-methylethanolamine N-methyltransferase activity and role in cleistothecium development, phosphatidylcholine biosynthetic process	0	-0.901385	1.85529e-05	6.56779	4.48e-07	1183	712	702	761	346	604	1081	958	1070	636	732	482	102.143	93.269	98.789	82.645	78.331	70.979	146.214	117.288	121.996	78.927	83.094	88.74
B9J08_001120	CTA8	NA	HSF1	NA	mRNA Ortholog(s) have DNA-binding transcription factor activity	0	-0.899098	0.00806592	6.36722	0.000839219	549	533	452	661	340	615	1334	580	1392	551	742	547	47.402	69.82	63.608	71.785	76.973	72.271	180.434	71.009	158.709	68.378	84.229	100.708
B9J08_003595	MOH1	NA	MOH1	NA	mRNA Ortholog of S. cerevisiae : MOH1, C. albicans SC5314 : C4_03430W_A/MOH1, C. glabrata CBS138 : CAGL0F04631g, C. dubliniensis CD36 : Cd36_43220 and C. parapsilosis CDC317 : CPAR2_403470	0	-0.887042	0.000473916	8.03588	2.50835e-05	4325	3408	3407	4086	2036	4619	1388	1270	1925	799	987	915	373.43	446.432	479.451	443.743	460.932	542.798	187.738	155.486	219.479	99.155	112.04	168.46
B9J08_002168	MAL31	NA	MAL31	NA	mRNA Has domain(s) with predicted transmembrane transporter activity, role in transmembrane transport and integral component of membrane, membrane localization	0	-0.884374	0.00114817	6.33569	7.57902e-05	1204	810	769	780	190	449	843	680	990	512	600	389	103.956	106.106	108.218	84.709	43.014	52.764	114.023	83.252	112.875	63.538	68.11	71.618
B9J08_000740	GDH3	NA	GDH3	NA	mRNA Ortholog(s) have glutamate dehydrogenase (NADP+) activity, role in ammonia assimilation cycle, glutamate biosynthetic process, invasive filamentous growth and cytosol, extracellular region, intracellular, nucleus localization	0	-0.88163	0.0011806	5.61548	7.91183e-05	1101	743	704	788	400	871	256	272	232	181	168	108	95.063	97.329	99.071	85.578	90.556	102.355	34.626	33.301	26.452	22.462	19.071	19.884
B9J08_003539	NA	NA	NA	NA	mRNA Ortholog of C. albicans SC5314 : C4_00050W_A, C. dubliniensis CD36 : Cd36_40110, C. parapsilosis CDC317 : CPAR2_402300 and Candida tenuis NRRL Y-1498 : CANTEDRAFT_94507	0	-0.880725	8.09037e-05	6.34287	2.73532e-06	1094	670	656	744	304	603	919	650	855	514	585	357	94.458	87.767	92.316	80.799	68.823	70.861	124.302	79.579	97.483	63.787	66.407	65.727
B9J08_001881	NA	NA	YBR062C	NA	mRNA Has domain(s) with predicted zinc ion binding activity	0	-0.878719	9.13503e-06	8.48	1.65e-07	5016	3446	3402	3670	1749	3338	2572	2997	3461	1876	2147	1405	433.092	451.41	478.747	398.565	395.957	392.262	347.884	366.922	394.606	232.809	243.719	258.673
B9J08_002626	NA	orf19.5876	NA	NA	mRNA Ortholog of Candida lusitaniae ATCC 42720 : CLUG_02657	0	-0.875459	2.08451e-05	6.58615	5.24e-07	2039	1383	1306	1222	561	1014	618	549	659	365	462	282	176.052	181.166	183.787	132.71	127.005	119.159	83.589	67.214	75.136	45.296	52.444	51.919
B9J08_001740	POX1-3	NA	POX1	NA	mRNA Ortholog(s) have role in fatty acid beta-oxidation and peroxisomal matrix localization	0	-0.87317	0.00954905	10.0203	0.0010262	11477	9459	10555	8598	2442	4002	15593	8862	13302	7143	9701	5692	990.949	1239.08	1485.36	933.751	552.846	470.292	2109.08	1084.97	1516.63	886.436	1101.22	1047.95
B9J08_005266	NA	NA	NA	NA	mRNA Ortholog of C. albicans SC5314 : C7_00850W_A, C. dubliniensis CD36 : Cd36_70790, C. parapsilosis CDC317 : CPAR2_301530 and Candida tenuis NRRL Y-1498 : CANTEDRAFT_94947	0	-0.869663	0.00926596	4.03054	0.000990404	149	135	108	82	74	136	153	170	241	104	149	88	12.865	17.684	15.198	8.905	16.753	15.982	20.694	20.813	27.478	12.906	16.914	16.202
B9J08_002012	NA	NA	NA	NA	mRNA Ortholog of C. albicans SC5314 : C1_01220C_A, C. dubliniensis CD36 : Cd36_01140, Candida tenuis NRRL Y-1498 : CANTEDRAFT_114214 and Debaryomyces hansenii CBS767 : DEHA2D14784g	0	-0.868064	0.000476496	7.58622	2.53159e-05	1353	810	922	1006	426	705	2944	4110	3403	2256	2634	1500	116.821	106.106	129.749	109.253	96.442	82.847	398.2	503.187	387.994	279.966	299.001	276.163
B9J08_000779	NA	NA	ATG21	NA	mRNA Ortholog(s) have phosphatidylinositol-3,5-bisphosphate binding, phosphatidylinositol-3-phosphate binding, phosphatidylinositol-4-phosphate binding activity	0	-0.860063	0.000110443	6.32082	4.15635e-06	869	672	582	845	316	667	804	624	943	457	618	370	75.031	88.029	81.902	91.768	71.539	78.382	108.747	76.396	107.516	56.713	70.153	68.12
B9J08_000316	NA	NA	NA	NA	mRNA Ortholog of C. albicans SC5314 : C1_09650W_A, C. dubliniensis CD36 : Cd36_09090, Candida tenuis NRRL Y-1498 : CANTEDRAFT_136328 and Debaryomyces hansenii CBS767 : DEHA2B10934g	0	-0.859947	0.000264898	5.93327	1.23146e-05	847	503	495	656	294	540	456	582	588	310	408	274	73.132	65.891	69.659	71.242	66.559	63.458	61.678	71.254	67.041	38.471	46.315	50.446
B9J08_000775	TPS2	NA	TPS2	NA	mRNA Ortholog(s) have trehalose-phosphatase activity and role in cellular response to heat, fungal-type cell wall organization, trehalose biosynthetic process, trehalose metabolic process, trehalose metabolism in response to stress	0	-0.855613	2.14386e-05	7.01379	5.44e-07	1838	1263	1298	1601	781	1542	862	991	1009	619	697	443	158.697	165.447	182.661	173.87	176.811	181.207	116.592	121.328	115.041	76.817	79.121	81.56
B9J08_000382	MET6	NA	MET6	NA	mRNA Ortholog(s) have 5-methyltetrahydropteroyltriglutamate-homocysteine S-methyltransferase activity, methionine synthase activity	0	-0.852819	0.00168887	9.12418	0.000124057	4911	5269	5000	5438	3082	5244	4251	6051	4897	3351	3730	2258	424.026	690.214	703.626	590.572	697.736	616.244	574.982	740.823	558.332	415.854	423.415	415.718
B9J08_001696	NA	NA	MDM36	NA	mRNA Ortholog(s) have role in mitochondrial fission, mitochondrion inheritance, mitochondrion localization, mitochondrion organization and cytoplasm, mitochondrion localization	0	-0.848657	3.74887e-05	6.69991	1.1015e-06	749	611	622	661	265	614	1294	1420	1734	955	1081	697	64.67	80.038	87.531	71.785	59.994	72.154	175.024	173.85	197.702	118.514	122.711	128.324
B9J08_003271	LYS2	NA	LYS2	NA	mRNA Ortholog(s) have L-aminoadipate-semialdehyde dehydrogenase activity and role in lysine biosynthetic process, lysine biosynthetic process via aminoadipic acid	0	-0.840728	0.000412009	8.03191	2.09777e-05	2001	949	1151	1396	572	1010	4528	4842	4847	3399	3356	2139	172.771	124.314	161.975	151.607	129.496	118.689	612.448	592.805	552.631	421.811	380.96	393.809
B9J08_001317	NA	NA	NA	NA	mRNA Ortholog of Candida tenuis NRRL Y-1498 : CANTEDRAFT_116538, Debaryomyces hansenii CBS767 : DEHA2D11440g and Candida guilliermondii ATCC 6260 : PGUG_04539	0	-0.839978	0.000480124	7.11545	2.5702e-05	2449	1823	1824	3420	1647	3777	713	519	630	358	435	354	211.452	238.804	256.683	371.415	372.866	443.851	96.439	63.541	71.83	44.427	49.38	65.175
B9J08_002201	NA	NA	NFU1	NA	mRNA Ortholog(s) have role in intracellular sequestering of iron ion, iron-sulfur cluster assembly, protein maturation by [4Fe-4S] cluster transfer, protein maturation by iron-sulfur cluster transfer and mitochondrial matrix localization	0	-0.836085	0.000514117	5.83633	2.84718e-05	627	394	397	552	228	506	641	416	706	362	399	312	54.137	51.612	55.868	59.948	51.617	59.462	86.7	50.931	80.495	44.924	45.293	57.442
B9J08_003153	NA	NA	YBL036C	NA	mRNA Ortholog(s) have pyridoxal phosphate binding activity	0	-0.828089	0.00375399	5.6826	0.000325613	560	436	380	532	204	371	362	630	573	344	388	226	48.352	57.114	53.476	57.776	46.184	43.598	48.963	77.131	65.331	42.69	44.044	41.609
B9J08_004793	NA	NA	SNA4	NA	mRNA Ortholog(s) have fungal-type vacuole lumen, fungal-type vacuole membrane localization	0	-0.825697	0.000620364	8.47558	3.53317e-05	9827	4537	5193	5297	2478	4015	1759	2124	2132	1339	1449	972	848.485	594.325	730.786	575.259	560.996	471.819	237.919	260.041	243.08	166.168	164.485	178.954
B9J08_003364	SSA2	NA	SSA2	NA	mRNA Ortholog(s) have ATP binding, tRNA binding, unfolded protein binding activity	0	-0.824068	0.000207104	11.7958	9.00273e-06	46766	25905	24482	31230	18521	33552	28181	32237	40089	22512	23569	16287	4037.88	3393.43	3445.24	3391.61	4192.98	3942.84	3811.71	3946.77	4570.75	2793.71	2675.46	2998.58
B9J08_002229	MNN4	NA	NA	MNN4	mRNA Ortholog of C. albicans SC5314 : C4_06540W_A/MNN4, C. dubliniensis CD36 : Cd36_46020, Candida tenuis NRRL Y-1498 : cten_CGOB_00145 and Debaryomyces hansenii CBS767 : DEHA2B03806g	0	-0.819366	0.000237629	6.29311	1.07122e-05	732	581	515	683	362	780	807	654	929	582	638	309	63.202	76.108	72.473	74.174	81.953	91.661	109.153	80.069	105.92	72.225	72.423	56.89
B9J08_004261	NA	NA	YLR149C	NA	mRNA Ortholog of S. cerevisiae : YLR149C, C. albicans SC5314 : C7_03280C_A, C. glabrata CBS138 : CAGL0K10824g, C. dubliniensis CD36 : Cd36_72930 and C. parapsilosis CDC317 : CPAR2_704080	0	-0.813977	0.000402748	7.98458	2.04251e-05	1918	974	1211	1023	382	735	4895	5253	5434	3726	3597	2532	165.604	127.589	170.418	111.099	86.481	86.373	662.088	643.124	619.558	462.391	408.317	466.164
B9J08_001679	CPH2	NA	HMS1	NA	mRNA Ortholog(s) have role in pseudohyphal growth	0	-0.813929	3.4659e-05	9.10233	9.97e-07	6510	4169	4243	4812	1959	3562	5348	5306	6681	3899	4513	2613	562.088	546.119	597.097	522.588	443.5	418.585	723.36	649.613	761.735	483.86	512.298	481.077
B9J08_000806	NA	NA	NA	NA	mRNA Ortholog of C. albicans SC5314 : CR_06290C_A, C. dubliniensis CD36 : Cd36_31790, C. parapsilosis CDC317 : CPAR2_204900 and Candida tenuis NRRL Y-1498 : CANTEDRAFT_136864	0	-0.79917	0.00183277	4.76858	0.000136471	308	277	204	287	146	294	228	205	247	128	186	123	26.593	36.286	28.708	31.168	33.053	34.549	30.839	25.098	28.162	15.885	21.114	22.645
B9J08_004037	NA	NA	NA	NA	mRNA Ortholog of C. albicans SC5314 : C1_10170W_A, C. dubliniensis CD36 : Cd36_09560, C. parapsilosis CDC317 : CPAR2_805040, Debaryomyces hansenii CBS767 : DEHA2B12210g and Pichia stipitis Pignal : PICST_54802	0	-0.799078	0.000514117	6.00622	2.85563e-05	626	390	351	405	245	508	779	712	818	462	704	342	54.05	51.088	49.395	43.983	55.466	59.697	105.366	87.17	93.264	57.334	79.915	62.965
B9J08_003964	STP2	NA	STP2	NA	mRNA Ortholog(s) have DNA-binding transcription activator activity, RNA polymerase II-specific, RNA polymerase II cis-regulatory region sequence-specific DNA binding activity and role in positive regulation of transcription by RNA polymerase II	0	-0.795057	0.000681635	8.22846	4.06756e-05	2970	1604	1922	1896	881	1703	3070	4321	4501	2622	2714	2120	256.436	210.116	270.474	205.907	199.45	200.127	415.242	529.019	513.182	325.386	308.083	390.311
B9J08_002477	PGM2	NA	PGM2	NA	mRNA Ortholog(s) have phosphoglucomutase activity	0	-0.793909	0.00346341	8.27236	0.000294832	2779	2830	2657	3832	1718	2833	2472	2969	2530	1938	2327	1036	239.945	370.717	373.907	416.159	388.939	332.918	334.358	363.494	288.458	240.503	264.152	190.737
B9J08_001859	NA	NA	FES1	NA	mRNA Ortholog(s) have adenyl-nucleotide exchange factor activity, role in cytoplasm protein quality control by the ubiquitin-proteasome system and cytosol localization	0	-0.783237	0.00270634	7.42716	0.000217858	1241	1242	1090	1735	888	2073	1887	1195	2048	1028	1222	959	107.151	162.696	153.39	188.423	201.035	243.607	255.232	146.304	233.503	127.573	138.717	176.56
B9J08_003723	NA	NA	NA	NA	mRNA Ortholog of C. albicans SC5314 : C2_04400W_A, C. dubliniensis CD36 : Cd36_19050, C. parapsilosis CDC317 : CPAR2_212730 and Candida tenuis NRRL Y-1498 : CANTEDRAFT_113003	0	-0.780044	0.00247032	6.31736	0.000195876	769	731	582	859	358	1075	682	557	853	511	556	292	66.397	95.758	81.902	93.288	81.048	126.328	92.246	68.193	97.255	63.414	63.115	53.76
B9J08_002937	BUB3	NA	BUB3	NA	mRNA Ortholog(s) have ubiquitin binding activity, role in mitotic DNA integrity checkpoint, positive regulation of protein autoubiquitination and condensed nuclear chromosome kinetochore, mitotic checkpoint complex localization	0	-0.779685	0.000681635	5.15069	4.07417e-05	213	200	201	309	147	277	417	422	444	301	293	236	18.391	26.199	28.286	33.558	33.279	32.551	56.403	51.665	50.623	37.354	33.26	43.45
B9J08_004264	HGT14	NA	NA	HXT9	mRNA Ortholog(s) have role in quinate catabolic process	0	-0.778639	0.00819709	4.83762	0.000861134	437	284	267	352	133	338	271	180	197	132	160	121	37.732	37.203	37.574	38.228	30.11	39.72	36.655	22.037	22.461	16.381	18.163	22.277
B9J08_001409	PGA38	NA	NA	FLO5	mRNA Ortholog of C. albicans SC5314 : C4_02440C_A/PGA38, C. dubliniensis CD36 : Cd36_42320, C. parapsilosis CDC317 : CPAR2_403260 and Candida tenuis NRRL Y-1498 : cten_CGOB_00184	0	-0.776524	0.0008375	8.66002	5.15499e-05	2293	2362	1889	2573	1193	2980	5342	4758	7326	3559	4500	3047	197.983	309.411	265.83	279.43	270.084	350.192	722.548	582.521	835.275	441.667	510.823	560.98
B9J08_002200	NA	NA	NA	NA	mRNA Ortholog of C. albicans SC5314 : C2_00590W_A, C. dubliniensis CD36 : Cd36_15550, C. parapsilosis CDC317 : CPAR2_213190 and Candida tenuis NRRL Y-1498 : CANTEDRAFT_119026	0	-0.776125	0.00128727	5.8669	8.80802e-05	669	468	379	507	240	378	558	682	572	413	426	327	57.763	61.306	53.335	55.061	54.334	44.42	75.474	83.497	65.217	51.253	48.358	60.204
B9J08_000972	STD1	NA	MTH1	NA	mRNA Ortholog(s) have role in glucose transmembrane transport, signal transduction	0	-0.768815	0.00190896	5.43645	0.000147138	528	313	305	395	118	228	443	480	538	324	364	262	45.589	41.002	42.921	42.897	26.714	26.793	59.919	58.766	61.34	40.208	41.32	48.237
B9J08_004988	NA	NA	NA	NA	mRNA Has domain(s) with predicted DNA-binding transcription factor activity, sequence-specific DNA binding activity and role in regulation of transcription, DNA-templated	0	-0.768081	0.000678445	7.28061	4.01415e-05	4760	2814	2348	2479	1221	2287	597	769	847	513	548	370	410.989	368.621	330.423	269.222	276.423	268.755	80.749	94.149	96.571	63.663	62.207	68.12
B9J08_002260	NA	NA	NAS6	NA	mRNA Ortholog(s) have proteasome regulatory particle binding activity, role in proteasome regulatory particle assembly and cytosol, nucleus localization	0	-0.766713	0.0018687	6.66259	0.00014166	1239	588	565	1142	458	1082	814	1029	1085	719	706	479	106.978	77.025	79.51	124.022	103.687	127.15	110.1	125.98	123.706	89.227	80.142	88.188
B9J08_000578	NA	NA	YLR352W	NA	mRNA Ortholog(s) have SCF ubiquitin ligase complex localization	0	-0.764067	0.00105103	6.40319	6.76856e-05	669	550	509	680	258	688	913	933	1146	578	738	631	57.763	72.047	71.629	73.849	58.409	80.85	123.491	114.227	130.661	71.729	83.775	116.173
B9J08_002122	PNC1	NA	PNC1	NA	mRNA Ortholog(s) have nicotinamidase activity and role in chromatin silencing at telomere, negative regulation of DNA amplification, nicotinate nucleotide salvage, rDNA heterochromatin assembly, replicative cell aging	0	-0.762619	9.29577e-05	8.4879	3.31123e-06	3566	2485	2372	2914	1168	2485	3683	4263	4144	2877	3176	1922	307.896	325.523	333.8	316.463	264.424	292.023	498.155	521.918	472.479	357.032	360.527	353.857
B9J08_001678	NA	NA	NA	NA	mRNA Ortholog of C. albicans SC5314 : C6_00290W_A, C. dubliniensis CD36 : Cd36_60240, C. parapsilosis CDC317 : CPAR2_603450 and Candida tenuis NRRL Y-1498 : CANTEDRAFT_134571	0	-0.757326	0.000241749	5.5965	1.09466e-05	381	315	287	401	183	369	468	530	681	384	457	260	32.896	41.264	40.388	43.549	41.43	43.363	63.301	64.888	77.644	47.654	51.877	47.868
B9J08_004405	NA	NA	VID30	NA	mRNA Ortholog(s) have role in negative regulation of gluconeogenesis, proteasome-mediated ubiquitin-dependent protein catabolic process, regulation of nitrogen utilization and GID complex localization	0	-0.757181	0.00119888	5.86393	8.08261e-05	608	599	482	550	314	644	438	425	602	332	394	233	52.496	78.466	67.83	59.731	71.087	75.679	59.243	52.033	68.637	41.201	44.725	42.897
B9J08_000824	FGR41	NA	NA	NA	mRNA Ortholog of C. albicans SC5314 : C1_10400C_A/FGR41, C. dubliniensis CD36 : Cd36_09790, C. parapsilosis CDC317 : CPAR2_207330 and Candida tenuis NRRL Y-1498 : cten_CGOB_00030	0	-0.755964	0.000974324	7.5224	6.13732e-05	2026	1309	1240	1282	609	1020	1633	2369	2481	1668	1590	989	174.929	171.473	174.499	139.226	137.872	119.864	220.876	290.036	282.872	206.996	180.491	182.084
B9J08_000307	PTP2	NA	PTP2	NA	mRNA Ortholog(s) have MAP kinase tyrosine phosphatase activity, protein tyrosine phosphatase activity	0	-0.755724	0.000454995	7.05816	2.37158e-05	2802	1838	1644	1692	924	1599	742	856	770	499	641	418	241.931	240.769	231.352	183.753	209.185	187.905	100.361	104.8	87.792	61.925	72.764	76.958
B9J08_003268	NA	SOU2	NA	SPS19	mRNA Has domain(s) with predicted oxidoreductase activity and role in metabolic process	0	-0.752003	0.00976212	5.56299	0.00105892	600	268	359	358	98	201	577	486	782	367	536	309	51.805	35.107	50.52	38.879	22.186	23.62	78.044	59.501	89.16	45.544	60.845	56.89
B9J08_001946	NA	NA	TDA9	NA	mRNA Ortholog(s) have sequence-specific DNA binding activity and role in acetate biosynthetic process	0	-0.7516	0.000264898	6.02867	1.22661e-05	726	539	558	573	292	496	575	520	766	389	527	309	62.684	70.606	78.525	62.228	66.106	58.287	77.773	63.664	87.336	48.274	59.823	56.89
B9J08_004334	GRF10	NA	PHO2	NA	mRNA Ortholog(s) have DNA-binding transcription activator activity, RNA polymerase II-specific, RNA polymerase II cis-regulatory region sequence-specific DNA binding activity	0	-0.749407	0.00259573	6.47313	0.000207387	928	931	774	832	418	1029	720	564	982	506	592	372	80.126	121.957	108.921	90.356	94.631	120.922	97.386	69.05	111.963	62.794	67.202	68.489
B9J08_005330	NA	NA	NNK1	NA	mRNA Ortholog(s) have role in proteolysis and cytoplasm localization	0	-0.740328	0.00101537	7.5153	6.47761e-05	2322	1316	1316	1505	619	996	1775	2136	2026	1446	1546	970	200.487	172.39	185.194	163.444	140.136	117.044	240.083	261.51	230.995	179.447	175.496	178.586
B9J08_004052	NA	NA	FRE8	NA	mRNA Ortholog(s) have oxidoreductase activity, oxidizing metal ions activity and role in cellular metal ion homeostasis	0	-0.738731	0.00152245	5.95828	0.000110762	845	565	589	507	236	637	449	488	705	355	446	279	72.959	74.012	82.887	55.061	53.428	74.857	60.731	59.746	80.381	44.055	50.628	51.366
B9J08_001698	NA	NA	NA	NA	mRNA Ortholog of C. albicans SC5314 : CR_05750W_A, C. dubliniensis CD36 : Cd36_31150, C. parapsilosis CDC317 : CPAR2_205350 and Candida tenuis NRRL Y-1498 : CANTEDRAFT_112958	0	-0.737001	0.00143989	7.20269	0.000102291	5153	2763	3147	2007	896	1681	730	660	710	419	549	432	444.921	361.94	442.862	217.962	202.846	197.541	98.738	80.804	80.951	51.997	62.32	79.535
B9J08_005070	DSE1	NA	DSE1	NA	mRNA Ortholog(s) have G-protein beta/gamma-subunit complex binding, mitogen-activated protein kinase kinase kinase binding activity	0	-0.735645	0.000116531	7.15038	4.46179e-06	1326	843	830	886	397	716	1698	1977	1992	1334	1475	970	114.49	110.429	116.802	96.22	89.877	84.14	229.668	242.044	227.118	165.547	167.436	178.586
B9J08_004242	NA	NA	UFD4	NA	mRNA Ortholog(s) have proteasome regulatory particle binding, ubiquitin protein ligase activity	0	-0.731493	0.00302273	6.28003	0.000247586	502	536	439	692	312	765	890	658	1041	533	667	504	43.344	70.213	61.778	75.152	70.634	89.898	120.38	80.559	118.69	66.145	75.715	92.791
B9J08_005451	DOS2	NA	DOS2	NA	mRNA Ortholog of S. cerevisiae : DOS2, C. albicans SC5314 : C1_13920W_A/DOS2, C. glabrata CBS138 : CAGL0G05225g/DOS1, C. dubliniensis CD36 : Cd36_12900 and C. parapsilosis CDC317 : CPAR2_700250	0	-0.726852	9.00968e-05	7.08419	3.1368e-06	1342	1041	1000	1156	521	1065	1397	1302	1411	1028	1009	721	115.871	136.366	140.725	125.543	117.95	125.153	188.955	159.404	160.875	127.573	114.538	132.743
B9J08_002631	NA	NA	YDR282C	NA	mRNA Ortholog(s) have mitochondrial inner membrane localization	0	-0.725772	0.00611587	5.92741	0.000603094	617	441	520	691	301	538	422	672	554	401	408	278	53.273	57.769	73.177	75.043	68.144	63.223	57.079	82.273	63.164	49.764	46.315	51.182
B9J08_004263	NA	IFG3	NA	NA	mRNA Has domain(s) with predicted oxidoreductase activity and role in oxidation-reduction process	0	-0.724874	0.000545708	6.52285	3.07503e-05	1154	647	611	780	335	691	812	990	1023	689	778	443	99.639	84.754	85.983	84.709	75.841	81.202	109.83	121.206	116.637	85.504	88.316	81.56
B9J08_002165	NA	NA	VAM7	NA	mRNA Ortholog(s) have SNAP receptor activity, phosphatidylinositol-3-phosphate binding activity	0	-0.720639	0.00611091	7.14505	0.000600145	1626	1365	1336	1973	968	2151	706	1182	1063	688	694	553	140.392	178.809	188.009	214.27	219.146	252.773	95.492	144.712	121.198	85.38	78.78	101.812
B9J08_005144	HTA2	NA	HTA1	NA	mRNA Ortholog(s) have role in DNA repair, mitotic chromosome condensation, negative regulation of transcription by RNA polymerase II, positive regulation of DNA repair, protein localization to kinetochore, transfer RNA gene-mediated silencing	0	-0.716649	0.000364887	11.332	1.78441e-05	29281	16679	15722	19246	9581	18977	23864	25829	35522	19642	23004	14383	2528.18	2184.87	2212.48	2090.13	2169.05	2230.07	3227.8	3162.24	4050.05	2437.54	2611.32	2648.04
B9J08_001443	MHP1	NA	MHP1	NA	mRNA Ortholog(s) have structural constituent of cytoskeleton activity, role in fungal-type cell wall organization, negative regulation of microtubule depolymerization and microtubule localization	0	-0.71579	0.000278272	7.4153	1.29924e-05	1554	1407	1367	1587	737	1339	1553	1462	1942	1120	1420	824	134.176	184.31	192.371	172.35	166.85	157.351	210.056	178.992	221.417	138.99	161.193	151.706
B9J08_002691	YHB1	NA	YHB1	NA	mRNA Ortholog(s) have nitric oxide reductase activity	0	-0.714771	0.00819709	10.0692	0.000860306	7537	6661	5770	5735	2548	6361	11013	19495	16811	11782	12097	7572	650.761	872.559	811.984	622.826	576.844	747.508	1489.6	2386.77	1916.71	1462.13	1373.2	1394.07
B9J08_005545	RBT5	NA	NA	NA	mRNA Ortholog of C. albicans SC5314 : C4_00130W_A/RBT5, C. dubliniensis CD36 : Cd36_40190, C. parapsilosis CDC317 : CPAR2_402920 and Candida tenuis NRRL Y-1498 : CANTEDRAFT_104115	0	-0.714742	0.00635676	9.15496	0.000634524	13827	10166	10779	16045	6383	12834	2482	1478	2548	1225	1662	1377	1193.85	1331.7	1516.88	1742.5	1445.05	1508.18	335.71	180.951	290.511	152.021	188.664	253.518
B9J08_004769	UBI4	NA	UBI4	NA	mRNA Ortholog(s) have protein tag activity, role in meiotic cell cycle, protein ubiquitination and peroxisome localization	0	-0.713544	0.00977338	9.91688	0.00106246	10116	8819	8430	10490	4652	8843	6644	11277	7349	5940	6423	4333	873.437	1155.25	1186.31	1139.22	1053.17	1039.18	898.654	1380.64	837.897	737.145	729.114	797.744
B9J08_000695	NTH1	NA	NTH1	NA	mRNA Ortholog(s) have alpha,alpha-trehalase activity, calcium ion binding activity and role in ascospore formation, cellular response to desiccation, trehalose catabolic process	0	-0.703509	0.00193714	8.09356	0.00015048	4023	2014	1913	2502	1089	1849	2790	2407	2669	2011	2254	1204	347.355	263.824	269.207	271.72	246.54	217.284	377.37	294.689	304.306	249.562	255.865	221.667
B9J08_003301	ZCF8	NA	NA	NA	mRNA Has domain(s) with predicted DNA-binding transcription factor activity, RNA polymerase II-specific, zinc ion binding activity, role in regulation of transcription, DNA-templated and host cell nucleus, nucleus localization	0	-0.703408	0.000365256	6.57417	1.79357e-05	1383	1018	948	834	403	850	775	805	739	559	612	410	119.411	133.353	133.408	90.573	91.235	99.887	104.825	98.556	84.257	69.371	69.472	75.485
B9J08_002167	NA	NA	DMA2	NA	mRNA Ortholog(s) have ubiquitin-protein transferase activity	0	-0.703406	0.000307719	7.68781	1.4553e-05	1792	1562	1409	1882	791	1930	1963	1960	2256	1398	1626	1168	154.725	204.615	198.282	204.387	179.075	226.802	265.511	239.962	257.218	173.49	184.577	215.039
B9J08_003455	NA	NA	AIM14	NA	mRNA Ortholog(s) have superoxide-generating NADPH oxidase activity, role in apoptotic process, regulation of actin cytoskeleton organization and perinuclear endoplasmic reticulum localization	0	-0.701073	0.00445941	5.47566	0.000400261	617	372	380	537	197	374	381	323	414	317	306	154	53.273	48.73	53.476	58.319	44.599	43.95	51.533	39.545	47.202	39.339	34.736	28.353
B9J08_004447	NA	MNN14	NA	MNT2	mRNA Has domain(s) with predicted transferase activity, transferring glycosyl groups activity and role in protein glycosylation	0	-0.694322	0.00639734	5.87656	0.000639863	2250	1640	1552	1613	785	1413	187	154	166	111	139	97	194.27	214.832	218.406	175.173	177.717	166.048	25.293	18.854	18.927	13.775	15.779	17.859
B9J08_001697	PTC4	NA	PTC4	NA	mRNA Ortholog(s) have protein serine/threonine phosphatase activity and role in protein dephosphorylation	0	-0.692358	0.000106868	8.18734	3.95729e-06	3782	3155	2812	3675	1618	3136	2036	2023	2242	1586	1661	1095	326.546	413.29	395.719	399.108	366.3	368.524	275.385	247.676	255.622	196.82	188.55	201.599
B9J08_005581	GDB1	NA	GDB1	NA	mRNA Ortholog(s) have 4-alpha-glucanotransferase activity, amylo-alpha-1,6-glucosidase activity and role in glycogen catabolic process	0	-0.692035	0.000320185	7.49953	1.52715e-05	1934	1426	1299	1671	750	1776	1778	1408	1869	1373	1273	836	166.986	186.799	182.802	181.472	169.793	208.705	240.489	172.381	213.094	170.387	144.506	153.915
B9J08_004870	CUP9	NA	TOS8	NA	mRNA Ortholog(s) have chromatin binding activity and nuclear chromatin localization	0	-0.689921	0.000392239	7.9897	1.96554e-05	1831	1076	1067	1441	617	1263	3902	3651	4621	2633	3153	2494	158.093	140.951	150.154	156.494	139.683	148.42	527.777	446.991	526.864	326.752	357.916	459.168
B9J08_002243	NA	GIT3	NA	GIT1	mRNA Has domain(s) with predicted transmembrane transporter activity, role in transmembrane transport and integral component of membrane localization	0	-0.689053	0.00132763	7.62668	9.16436e-05	1105	823	907	852	421	805	3679	2926	4248	2087	3172	2176	95.408	107.809	127.638	92.528	95.311	94.599	497.614	358.23	484.336	258.994	360.073	400.621
B9J08_004366	NA	NA	NA	NA	mRNA Protein of unknown function	0	-0.681847	0.000871571	9.82816	5.41991e-05	26602	21116	18916	15765	7897	13069	3895	3037	4272	2270	3136	2270	2296.87	2766.1	2661.96	1712.09	1787.81	1535.79	526.83	371.819	487.073	281.704	355.987	417.927
B9J08_000467	MNL1	NA	COM2	NA	mRNA Ortholog(s) have role in cellular response to sulfur dioxide, regulation of cellular response to stress	0	-0.676984	0.00336681	6.03535	0.000283406	487	503	436	537	239	537	572	749	797	503	568	387	42.049	65.891	61.356	58.319	54.107	63.105	77.368	91.7	90.87	62.422	64.477	71.25
B9J08_005375	NA	NA	YHL008C	NA	mRNA Ortholog(s) have small molecule sensor activity and role in chloride transport, regulation of chloride transport	0	-0.674359	0.00133789	6.63442	9.26213e-05	1186	833	708	1159	508	973	861	813	808	717	670	374	102.402	109.119	99.633	125.868	115.007	114.341	116.457	99.535	92.124	88.979	76.056	68.857
B9J08_004355	GLN3	NA	GLN3	NA	mRNA Ortholog(s) have DNA-binding transcription factor activity, RNA polymerase II cis-regulatory region sequence-specific DNA binding activity	0	-0.668298	0.00346341	6.29481	0.000294532	1330	773	630	861	422	714	615	468	728	480	490	291	114.835	101.259	88.657	93.505	95.537	83.905	83.184	57.297	83.003	59.567	55.623	53.576
B9J08_000236	SIS1	NA	SIS1	NA	mRNA Ortholog(s) have misfolded protein binding activity	0	-0.665396	0.000455967	7.91184	2.395e-05	2583	2104	1760	2508	1191	2590	2088	1597	2486	1483	1610	1150	223.022	275.614	247.676	272.371	269.631	304.362	282.419	195.52	283.442	184.038	182.761	211.725
B9J08_002703	NA	NA	NA	NA	mRNA Has domain(s) with predicted O-methyltransferase activity	0	-0.664528	0.00441014	7.57341	0.000394951	1402	1488	1371	1535	699	1555	1736	2161	2131	1636	1596	1012	121.052	194.921	192.934	166.702	158.247	182.735	234.808	264.571	242.966	203.025	181.172	186.318
B9J08_003182	NA	NA	NA	PCF11	mRNA Ortholog of C. albicans SC5314 : C2_05910W_A, C. dubliniensis CD36 : Cd36_20330, C. parapsilosis CDC317 : CPAR2_209890 and Candida tenuis NRRL Y-1498 : CANTEDRAFT_105451	0	-0.661636	0.00255044	5.49191	0.000203255	527	399	348	474	222	420	412	356	362	240	346	211	45.502	52.267	48.972	51.477	50.259	49.356	55.726	43.585	41.273	29.784	39.277	38.847
B9J08_004536	NA	orf19.3701	NA	NA	mRNA Protein of unknown function	0	-0.660444	0.0018687	7.24874	0.000140787	4024	2613	2477	1860	819	1639	804	893	775	537	697	499	347.441	342.291	348.576	201.998	185.414	192.606	108.747	109.33	88.362	66.641	79.121	91.87
B9J08_004030	TPK1	NA	NA	TPK2	mRNA Has domain(s) with predicted ATP binding, protein kinase activity, protein serine/threonine kinase activity, protein tyrosine kinase activity and role in protein phosphorylation	0	-0.659261	0.0018951	6.84545	0.000144926	1010	951	839	1153	439	1187	1109	965	1126	749	907	595	87.206	124.576	118.068	125.217	99.386	139.489	150.001	118.145	128.381	92.95	102.959	109.545
B9J08_001834	TPO4	NA	TPO4	NA	mRNA Ortholog(s) have spermidine transmembrane transporter activity, spermine transmembrane transporter activity, role in spermidine transport, spermine transport and fungal-type vacuole membrane, plasma membrane localization	0	-0.658673	0.000392239	9.31192	1.96145e-05	6931	5938	5312	6880	3155	7733	4965	4381	5756	3861	4183	2597	598.438	777.85	747.532	747.175	714.263	908.737	671.556	536.365	656.271	479.145	474.838	478.131
B9J08_000008	NA	orf19.7077	NA	FRE7	mRNA Has domain(s) with predicted oxidoreductase activity and role in oxidation-reduction process	0	-0.658208	0.00136452	7.27497	9.55634e-05	1864	1143	1337	1366	720	1144	1296	1480	1464	1153	1203	674	160.942	149.728	188.15	148.349	163.001	134.436	175.294	181.196	166.918	143.086	136.56	124.089
B9J08_003611	SDS24	NA	SDS24	NA	mRNA Ortholog(s) have protein serine/threonine phosphatase inhibitor activity	0	-0.656392	0.000199066	7.81281	8.57318e-06	2695	1753	1504	1993	956	1817	2025	1890	2466	1645	1634	1184	232.692	229.635	211.651	216.442	216.43	213.523	273.897	231.392	281.161	204.142	185.485	217.985
B9J08_004053	NA	NA	NA	NA	mRNA Ortholog of C. albicans SC5314 : C1_07220W_A, C. dubliniensis CD36 : Cd36_06760, C. parapsilosis CDC317 : CPAR2_210410, Debaryomyces hansenii CBS767 : DEHA2B11836g and Pichia stipitis Pignal : PICST_30016	0	-0.65153	0.00564263	6.74203	0.000543936	1136	579	640	729	219	555	1391	1171	1716	924	1243	832	98.085	75.846	90.064	79.17	49.58	65.22	188.144	143.365	195.65	114.667	141.101	153.179
B9J08_005145	NA	NA	NA	HTB1	mRNA Ortholog(s) have nucleus, site of double-strand break localization	0	-0.648482	0.000678445	11.1345	4.00462e-05	27014	14991	13924	16846	8007	14712	23442	21465	27627	16592	21124	13566	2332.45	1963.75	1959.46	1829.49	1812.71	1728.87	3170.72	2627.96	3149.9	2059.04	2397.91	2497.62
B9J08_000238	HNT1	NA	HNT1	NA	mRNA Ortholog(s) have adenosine 5'-monophosphoramidase activity and role in nucleotide metabolic process, response to zinc ion	0	-0.637484	0.00460825	7.98446	0.000421039	3310	2370	2325	2230	1229	1823	1728	2544	2236	1669	1762	1170	285.793	310.459	327.186	242.18	278.234	214.228	233.726	311.461	254.938	207.121	200.015	215.407
B9J08_002096	CRZ1	NA	CRZ1	NA	mRNA Ortholog(s) have DNA-binding transcription activator activity, RNA polymerase II-specific, cis-regulatory region sequence-specific DNA binding activity	0	-0.635081	0.00101611	6.51508	6.50337e-05	1413	956	1007	975	430	844	686	677	643	496	558	379	122.001	125.231	141.71	105.886	97.348	99.182	92.787	82.885	73.312	61.553	63.342	69.777
B9J08_002533	NA	NA	TMC1	NA	mRNA Ortholog(s) have role in cellular response to arsenic-containing substance, cellular response to misfolded protein	0	-0.633407	0.0008375	9.30045	5.15748e-05	10426	8625	6765	9131	4422	8891	3629	3787	3467	2753	3006	2034	900.203	1129.83	952.006	991.635	1001.1	1044.82	490.851	463.642	395.29	341.643	341.229	374.477
B9J08_004762	NA	NA	MRS6	NA	mRNA Ortholog(s) have Rab GTPase binding, Rab geranylgeranyltransferase activity and role in activation of GTPase activity, endoplasmic reticulum to Golgi vesicle-mediated transport, protein geranylgeranylation, protein targeting to membrane	0	-0.624546	0.00336042	7.11449	0.000282007	1643	1106	1056	1217	524	977	1145	1529	1297	1105	1042	708	141.86	144.881	148.606	132.167	118.629	114.811	154.87	187.195	147.878	137.129	118.284	130.349
B9J08_000315	NA	NA	CSG2	NA	mRNA Ortholog(s) have enzyme regulator activity, role in cellular calcium ion homeostasis, glycosphingolipid biosynthetic process and integral component of endoplasmic reticulum membrane localization	0	-0.623269	0.00141861	5.6536	0.000100493	491	388	338	362	168	356	520	438	656	404	414	332	42.394	50.826	47.565	39.314	38.034	41.835	70.334	53.624	74.794	50.136	46.996	61.124
B9J08_001873	TPS3	NA	TPS3	NA	mRNA Ortholog(s) have alpha,alpha-trehalose-phosphate synthase (UDP-forming) activity, enzyme regulator activity, trehalose-phosphatase activity and role in trehalose biosynthetic process	0	-0.622455	0.000784129	6.79706	4.7499e-05	1368	996	909	1422	644	1395	682	832	923	604	673	468	118.116	130.471	127.919	154.431	145.796	163.932	92.246	101.862	105.236	74.956	76.396	86.163
B9J08_000059	PEX22	NA	NA	NA	mRNA Ortholog of C. albicans SC5314 : C2_06690C_A/PEX22, C. dubliniensis CD36 : Cd36_20990, C. parapsilosis CDC317 : CPAR2_104440 and Candida tenuis NRRL Y-1498 : CANTEDRAFT_113444	0	-0.621701	0.0018951	7.47337	0.000144832	4009	2191	1993	1824	907	1605	1067	1025	1479	885	1080	610	346.146	287.011	280.465	198.088	205.336	188.61	144.32	125.491	168.628	109.827	122.597	112.306
B9J08_002368	PHA2	NA	PHA2	NA	mRNA Ortholog(s) have prephenate dehydratase activity and role in L-phenylalanine biosynthetic process	0	-0.620068	0.00819709	6.4075	0.000862765	798	555	449	741	372	705	781	1029	835	770	771	400	68.901	72.702	63.186	80.473	84.217	82.847	105.637	125.98	95.203	95.556	87.521	73.644
B9J08_004511	NA	NA	RKM1	NA	mRNA Ortholog(s) have protein-lysine N-methyltransferase activity and role in peptidyl-lysine dimethylation, peptidyl-lysine monomethylation	0	-0.618178	0.00500717	6.32916	0.000465931	729	474	461	536	282	473	779	1081	1053	843	839	449	62.943	62.092	64.874	58.21	63.842	55.584	105.366	132.347	120.058	104.615	95.24	82.665
B9J08_001439	NA	NA	HEK2	NA	mRNA Ortholog(s) have mRNA 3'-UTR AU-rich region binding, mRNA binding activity	0	-0.615029	0.00977338	5.33858	0.00106408	388	295	223	329	130	389	430	321	532	319	383	220	33.501	38.644	31.382	35.73	29.431	45.713	58.161	39.3	60.656	39.587	43.477	40.504
B9J08_002618	NA	NA	NA	PIM1	mRNA Has domain(s) with predicted ATP binding, ATP-dependent peptidase activity, nucleoside-triphosphatase activity, nucleotide binding, serine-type endopeptidase activity and role in proteolysis	0	-0.614764	0.00632622	7.62369	0.00062893	3256	1638	1801	2303	977	1492	1667	1330	1623	1158	1357	840	281.13	214.57	253.446	250.108	221.184	175.331	225.475	162.832	185.047	143.706	154.041	154.651
B9J08_000581	NA	NA	NA	NA	mRNA Has domain(s) with predicted flavin adenine dinucleotide binding, oxidoreductase activity, acting on CH-OH group of donors activity and role in oxidation-reduction process	0	-0.605382	0.00481219	8.49938	0.000442578	6893	3567	3486	3330	1240	2179	2995	2773	3351	2410	2687	1608	595.157	467.26	490.568	361.641	280.725	256.063	405.098	339.498	382.065	299.078	305.018	296.047
B9J08_003579	ASH1	NA	ASH1	NA	mRNA Ortholog(s) have DNA-binding transcription repressor activity, RNA polymerase II-specific, cis-regulatory region sequence-specific DNA binding activity	0	-0.597575	0.00111753	5.78764	7.28678e-05	488	344	349	445	174	391	629	502	722	473	529	349	42.135	45.062	49.113	48.327	39.392	45.948	85.077	61.46	82.319	58.699	60.05	64.254
B9J08_000280	NA	NA	NA	VPS55	mRNA Ortholog of C. albicans SC5314 : C7_03970C_A, C. dubliniensis CD36 : Cd36_73640, C. parapsilosis CDC317 : CPAR2_702340 and Candida tenuis NRRL Y-1498 : CANTEDRAFT_112965	0	-0.593994	0.00946511	5.44848	0.00101528	630	511	442	538	227	434	286	235	401	245	273	154	54.396	66.939	62.201	58.427	51.391	51.001	38.684	28.771	45.72	30.404	30.99	28.353
B9J08_004039	CDL1	NA	NA	RNT1	mRNA Has domain(s) with predicted RNA binding, ribonuclease III activity and role in RNA processing	0	-0.593892	0.00680671	5.24814	0.000687113	393	209	231	351	160	371	378	361	378	328	309	191	33.932	27.378	32.508	38.119	36.223	43.598	51.128	44.197	43.098	40.704	35.076	35.165
B9J08_003684	GPD2	NA	NA	GPD1	mRNA Has domain(s) with predicted NAD binding, coenzyme binding, glycerol-3-phosphate dehydrogenase [NAD+] activity, oxidoreductase activity, acting on the CH-OH group of donors, NAD or NADP as acceptor, protein homodimerization activity	0	-0.589359	0.00926596	6.60247	0.000992049	1392	1064	1004	864	510	1047	553	761	810	573	548	425	120.188	139.379	141.288	93.831	115.459	123.037	74.798	93.169	92.352	71.108	62.207	78.246
Upregulated genes relative to Smooth on lactate
gene	C. albicans ortholog	C. albicans best hit	S. cerevisiae ortholog	S. cerevisiae best hit	product	smooth lactate	wrinkled lactate	FDR	AveExpr	P value	S1_Glu	S2_Glu	S3_Glu	W1_Glu	W2_Glu	W3_Glu	S1_Lac	S2_Lac	S3_Lac	W1_Lac	W2_Lac	W3_Lac	S1_Glu CPM	S2_Glu CPM	S3_Glu CPM	W1_Glu CPM	W2_Glu CPM	W3_Glu CPM	S1_Lac CPM	S2_Lac CPM	S3_Lac CPM	W1_Lac CPM	W2_Lac CPM	W3_Lac CPM
B9J08_001239	NA	NA	SVL3	NA	mRNA Ortholog(s) have role in endocytosis	0	0.589782	0.00072537	7.2661	4.35018e-05	2491	1573	1572	1890	1032	1818	653	583	739	1095	1276	910	215.078	206.056	221.22	205.256	233.635	213.641	88.323	71.377	84.257	135.888	144.847	167.539
B9J08_001002	TOS1	NA	TOS1	NA	mRNA Ortholog(s) have fungal-type cell wall localization	0	0.591284	0.0018687	8.8647	0.000141779	3828	2944	2546	3000	1585	3658	3468	2935	4475	5796	7374	4805	330.518	385.65	358.286	325.803	358.829	429.867	469.075	359.332	510.218	719.275	837.068	884.643
B9J08_001366	PGA6	NA	NA	CCW12	mRNA Ortholog of C. albicans SC5314 : C1_09080C_A/PGA6, C. dubliniensis CD36 : Cd36_08570, C. parapsilosis CDC317 : CPAR2_700870/PGA6 and Debaryomyces hansenii CBS767 : DEHA2A03498g	0	0.594005	0.0018687	8.071	0.000141528	1655	1467	1233	1537	810	1419	2714	1995	2999	4243	5527	3143	142.896	192.17	173.514	166.92	183.377	166.753	367.09	244.247	341.931	526.55	627.404	578.654
B9J08_005148	NA	FMP45	NA	FMP45	mRNA Has domain(s) with predicted plasma membrane localization	0	0.595068	0.00579302	5.53518	0.000559599	337	217	166	258	112	212	501	366	608	843	868	709	29.097	28.426	23.36	28.019	25.356	24.913	67.764	44.809	69.321	104.615	98.532	130.533
B9J08_004518	TRP99	NA	NA	AHP1	mRNA Ortholog(s) have unfolded protein binding activity	0	0.596552	0.00267076	7.84852	0.000213918	3064	1751	1404	2647	1189	2379	1176	1178	1420	2446	2466	1486	264.552	229.373	197.578	287.467	269.179	279.566	159.063	144.222	161.901	303.545	279.931	273.586
B9J08_002366	CCP1	NA	CCP1	NA	mRNA Ortholog(s) have cytochrome-c peroxidase activity, role in cellular response to oxidative stress and intracellular, mitochondrial intermembrane space localization	0	0.599119	0.00288364	6.27731	0.000234452	251	122	179	265	138	301	1419	1109	1736	2459	2716	1879	21.672	15.981	25.19	28.779	31.242	35.372	191.931	135.775	197.93	305.158	308.31	345.941
B9J08_003788	NA	NA	YEL1	NA	mRNA Ortholog(s) have ARF guanyl-nucleotide exchange factor activity and role in actin cortical patch localization, positive regulation of phosphatidylinositol biosynthetic process, protein localization	0	0.599611	0.00322206	5.98207	0.000267802	612	533	495	582	278	595	302	385	430	649	746	474	52.841	69.82	69.659	63.206	62.937	69.921	40.848	47.135	49.027	80.54	84.683	87.268
B9J08_002971	NA	NA	TSC13	NA	mRNA Ortholog(s) have oxidoreductase activity, role in very long-chain fatty acid metabolic process and endoplasmic reticulum membrane localization	0	0.599866	0.0038973	8.40165	0.000339612	2914	2941	2305	3987	1756	3088	2120	1602	2093	3181	4035	2544	251.601	385.257	324.372	432.992	397.542	362.884	286.747	196.133	238.634	394.758	458.038	468.373
B9J08_002104	MDG1	NA	MDG1	NA	mRNA Ortholog(s) have role in pheromone-dependent signal transduction involved in conjugation with cellular fusion and membrane raft, plasma membrane localization	0	0.602693	0.0010716	9.167	6.96572e-05	5951	5532	4371	6863	3197	5743	3147	2543	3280	5110	6254	3795	513.822	724.666	615.11	745.328	723.771	674.884	425.657	311.339	373.97	634.144	709.93	698.693
B9J08_002678	NA	NA	YMR090W	NA	mRNA Ortholog(s) have intracellular localization	0	0.606739	0.000987083	7.70786	6.25742e-05	2816	1698	1701	2174	862	1626	1150	1041	1365	1937	2531	1554	243.14	222.43	239.374	236.098	195.149	191.078	155.547	127.449	155.631	240.379	287.309	286.105
B9J08_002280	GAP4	NA	NA	SAM3	mRNA Has domain(s) with predicted role in amino acid transport, transmembrane transport and integral component of membrane, membrane localization	0	0.607058	0.00050296	7.97734	2.7228e-05	2046	1717	1617	2365	1116	2180	1625	1438	1869	3159	3360	1917	176.656	224.919	227.553	256.841	252.652	256.181	219.794	176.054	213.094	392.027	381.414	352.937
B9J08_001932	ASR1	NA	NA	NA	mRNA Ortholog of C. albicans SC5314 : C1_10740C_A/ASR1, C. dubliniensis CD36 : Cd36_10070, C. parapsilosis CDC317 : CPAR2_201810 and Candida tenuis NRRL Y-1498 : CANTEDRAFT_95453	0	0.608161	0.0018687	7.84011	0.000140353	1264	1041	799	1717	872	1546	2355	1580	2426	3726	4229	2678	109.137	136.366	112.439	186.468	197.413	181.677	318.533	193.439	276.601	462.391	480.06	493.044
B9J08_003324	NA	NA	DGK1	NA	mRNA Ortholog(s) have diacylglycerol kinase activity and role in phosphatidic acid biosynthetic process, regulation of isopentenyl diphosphate biosynthetic process, mevalonate pathway	0	0.613649	0.00308243	6.93638	0.000253096	2254	1430	1118	2205	849	1860	445	393	525	755	964	599	194.615	187.323	157.331	239.465	192.206	218.576	60.19	48.115	59.858	93.694	109.43	110.281
B9J08_003863	DAG7	NA	NA	NA	mRNA Ortholog of C. albicans SC5314 : C4_01010C_A/DAG7, C. dubliniensis CD36 : Cd36_41020/DAG7, C. parapsilosis CDC317 : CPAR2_401350/DAG7 and Candida tenuis NRRL Y-1498 : CANTEDRAFT_93275	0	0.614066	0.00184626	7.19827	0.000137847	1721	1505	1394	1785	899	1968	592	643	756	1203	1481	760	148.595	197.148	196.171	193.853	203.525	231.268	80.073	78.722	86.195	149.291	168.117	139.923
B9J08_005391	NA	NA	MIP1	NA	mRNA Ortholog(s) have 3'-5' exonuclease activity, DNA-directed DNA polymerase activity, role in mitochondrial DNA catabolic process, mitochondrial DNA replication, mitochondrial genome maintenance and mitochondrion localization	0	0.615793	0.000357875	7.96164	1.73572e-05	2280	1643	1568	2484	1166	2388	1555	1258	1857	2634	3047	2152	196.86	215.225	220.657	269.765	263.972	280.624	210.326	154.017	211.726	326.876	345.884	396.202
B9J08_003152	NA	IST2	NA	IST2	mRNA Ortholog of Candida lusitaniae ATCC 42720 : CLUG_02585	0	0.616156	0.00456429	7.55612	0.000411698	1444	1392	1150	2188	1066	2182	1246	794	1262	1838	2313	1398	124.678	182.345	161.834	237.619	241.333	256.416	168.531	97.209	143.887	228.093	262.563	257.384
B9J08_004644	NA	PDK2	PKP2	NA	mRNA Ortholog(s) have protein kinase activity, pyruvate dehydrogenase (acetyl-transferring) kinase activity	0	0.616884	0.00819709	5.54933	0.00085856	761	507	392	643	320	575	207	197	188	376	400	235	65.706	66.415	55.164	69.83	72.445	67.571	27.998	24.119	21.435	46.661	45.406	43.266
B9J08_000863	UGA1	NA	UGA1	NA	mRNA Ortholog(s) have 4-aminobutyrate transaminase activity, role in gamma-aminobutyric acid catabolic process and cytosol localization	0	0.617515	0.00546243	7.49864	0.000521069	731	496	390	621	279	529	3451	2178	3933	5015	6406	4384	63.116	64.974	54.883	67.441	63.163	62.165	466.775	266.652	448.422	622.354	727.184	807.133
B9J08_000593	NA	NA	NA	BEM1	mRNA Has domain(s) with predicted phosphatidylinositol binding activity and role in cell communication	0	0.620267	0.00475417	5.36236	0.000436285	382	224	247	342	150	285	328	227	350	467	658	413	32.983	29.343	34.759	37.142	33.959	33.492	44.365	27.792	39.905	57.954	74.694	76.037
B9J08_001545	NA	NA	NA	NA	mRNA Has domain(s) with predicted metal ion binding activity	0	0.624928	0.00330556	7.94583	0.000275408	1636	753	855	579	314	587	3443	3796	4902	7131	8098	5362	141.256	98.639	120.32	62.88	71.087	68.981	465.693	464.744	558.902	884.947	919.253	987.192
B9J08_001688	NA	NA	NA	ENV9	mRNA Has domain(s) with predicted oxidoreductase activity and role in metabolic process	0	0.626568	0.00603179	6.63128	0.000591162	2323	2073	1941	2363	1117	2397	251	186	250	374	489	313	200.573	271.553	273.148	256.624	252.879	281.681	33.95	22.772	28.504	46.413	55.509	57.626
B9J08_002795	FLU1	NA	TPO1	NA	mRNA Ortholog(s) have spermidine transmembrane transporter activity, spermine transmembrane transporter activity and role in polyamine transmembrane transport, putrescine transport, spermidine transport, spermine transport	0	0.636773	0.00559806	5.94065	0.000537387	587	528	397	807	380	822	262	361	306	555	645	393	50.683	69.165	55.868	87.641	86.028	96.597	35.438	44.197	34.889	68.875	73.218	72.355
B9J08_001869	NA	NA	AIM7	NA	mRNA Ortholog(s) have Arp2/3 complex binding activity, role in actin filament debranching, negative regulation of Arp2/3 complex-mediated actin nucleation and actin cortical patch, cytoplasm localization	0	0.639351	0.00626302	6.06376	0.000620126	627	618	566	822	405	930	290	295	378	539	751	396	54.137	80.955	79.65	89.27	91.688	109.288	39.225	36.117	43.098	66.889	85.251	72.907
B9J08_005331	STE11	NA	STE11	NA	mRNA Ortholog(s) have MAP kinase kinase kinase activity, SAM domain binding activity	0	0.640729	0.00680671	5.0297	0.000687657	256	190	232	304	130	297	221	223	200	404	404	300	22.104	24.889	32.648	33.015	29.431	34.902	29.892	27.302	22.803	50.136	45.861	55.233
B9J08_004602	OPT1	NA	OPT1	NA	mRNA Ortholog(s) have oligopeptide transmembrane transporter activity, proton-dependent oligopeptide secondary active transmembrane transporter activity, tetrapeptide transmembrane transporter activity	0	0.643502	0.00223454	5.47188	0.000175381	485	387	352	184	85	208	351	296	462	575	812	527	41.876	50.695	49.535	19.983	19.243	24.443	47.476	36.239	52.675	71.357	92.175	97.025
B9J08_003980	NA	NA	EFM2	NA	mRNA Ortholog(s) have S-adenosylmethionine-dependent methyltransferase activity, protein-lysine N-methyltransferase activity	0	0.647988	0.00152245	5.28782	0.000110399	445	300	252	406	167	376	201	202	275	425	456	296	38.422	39.299	35.463	44.092	37.807	44.185	27.187	24.731	31.354	52.742	51.763	54.496
B9J08_001809	SOU1	NA	NA	SPS19	mRNA Has domain(s) with predicted oxidoreductase activity and role in metabolic process	0	0.650018	0.000528594	9.64842	2.95732e-05	12305	9114	7719	12901	5966	10362	3493	2544	3375	5421	6825	4133	1062.44	1193.89	1086.26	1401.06	1350.65	1217.68	472.456	311.461	384.801	672.738	774.747	760.922
B9J08_001816	CHS7	NA	CHS7	NA	mRNA Ortholog(s) have unfolded protein binding activity and role in endoplasmic reticulum to Golgi vesicle-mediated transport, fungal-type cell wall chitin biosynthetic process, protein folding	0	0.653211	0.00587927	5.52102	0.000573589	610	415	418	397	258	514	202	218	260	376	466	343	52.669	54.363	58.823	43.115	58.409	60.402	27.322	26.69	29.644	46.661	52.899	63.149
B9J08_002008	ASE1	NA	ASE1	NA	mRNA Ortholog(s) have microtubule binding activity	0	0.657167	0.00538682	5.44407	0.000511688	363	294	307	453	142	395	301	248	289	477	579	407	31.342	38.513	43.203	49.196	32.147	46.418	40.713	30.363	32.95	59.195	65.726	74.932
B9J08_003883	NA	NA	YHC3	NA	mRNA Ortholog(s) have role in arginine transport, lysine transport, regulation of intracellular pH and cell division site, cell tip, cytoplasm, fungal-type vacuole, fungal-type vacuole membrane localization	0	0.659603	0.00318109	5.54811	0.000262477	639	485	371	666	347	620	212	181	198	371	438	236	55.173	63.533	52.209	72.328	78.558	72.859	28.675	22.16	22.575	46.041	49.72	43.45
B9J08_003912	NA	SAP9	NA	YPS1	mRNA Has domain(s) with predicted aspartic-type endopeptidase activity and role in proteolysis	0	0.659886	0.000963195	6.98955	6.04783e-05	781	751	689	839	414	921	1063	905	1121	2049	2048	1337	67.433	98.377	96.96	91.116	93.726	108.231	143.779	110.799	127.811	254.278	232.481	246.154
B9J08_004935	IQG1	NA	IQG1	NA	mRNA Ortholog(s) have actin filament binding, calmodulin binding, myosin II heavy chain binding, myosin II light chain binding, myosin light chain binding activity	0	0.660149	0.00975422	4.90661	0.0010561	178	169	150	225	96	273	245	200	257	417	421	389	15.369	22.138	21.109	24.435	21.734	32.081	33.138	24.486	29.302	51.749	47.79	71.618
B9J08_003109	NA	NA	NA	NA	mRNA Ortholog of C. albicans SC5314 : C5_03430W_A, C. dubliniensis CD36 : Cd36_53200, C. parapsilosis CDC317 : CPAR2_502060 and Candida tenuis NRRL Y-1498 : CANTEDRAFT_115234	0	0.662537	0.00354462	5.83734	0.000303172	185	206	202	236	142	287	793	573	814	1297	1485	1009	15.973	26.985	28.426	25.63	32.147	33.727	107.26	70.152	92.808	160.956	168.571	185.766
B9J08_001868	CDC14	NA	CDC14	NA	mRNA Ortholog(s) have phosphoprotein phosphatase activity, protein serine/threonine phosphatase activity	0	0.663062	0.00511622	4.81412	0.000481866	298	165	156	215	106	238	173	153	260	344	420	256	25.73	21.614	21.953	23.349	23.997	27.968	23.4	18.732	29.644	42.69	47.677	47.132
B9J08_003517	CAR2	NA	CAR2	NA	mRNA Ortholog(s) have ornithine-oxo-acid transaminase activity, role in arginine catabolic process to proline via ornithine, ornithine metabolic process and cytosol, intracellular localization	0	0.668386	0.0032065	8.63079	0.000265284	2835	1654	1600	1916	648	1205	4234	4090	6121	8262	10182	6659	244.78	216.666	225.16	208.079	146.701	141.605	572.682	500.738	697.887	1025.3	1155.82	1225.98
B9J08_003314	RBE1	NA	PRY2	NA	mRNA Ortholog(s) have sterol binding activity, role in fatty acid transport, sterol transport and extracellular region localization	0	0.674372	0.000457215	7.62697	2.41075e-05	1757	1386	1145	1786	727	1820	1309	1118	1441	2338	2513	1928	151.703	181.559	161.13	193.961	164.586	213.876	177.053	136.877	164.296	290.142	285.266	354.962
B9J08_004059	FAA2	NA	NA	FAA2	mRNA Has domain(s) with predicted catalytic activity and role in metabolic process	0	0.677404	0.00500717	4.87527	0.000465463	313	199	190	293	117	275	175	137	220	287	373	280	27.025	26.068	26.738	31.82	26.488	32.316	23.67	16.773	25.083	35.616	42.342	51.55
B9J08_004872	NA	NA	YGR111W	NA	mRNA Ortholog of S. cerevisiae : YGR111W, C. albicans SC5314 : C4_05850C_A, C. glabrata CBS138 : CAGL0L04708g, C. dubliniensis CD36 : Cd36_45340 and C. parapsilosis CDC317 : CPAR2_500680	0	0.677773	0.0048887	8.08374	0.000451583	2655	1651	1589	1624	695	1484	1672	2041	3095	3403	4834	3472	229.238	216.273	223.612	176.368	157.342	174.391	226.151	249.879	352.877	422.307	548.737	639.226
B9J08_000187	ARF3	NA	NA	ARF3	mRNA Has domain(s) with predicted GTP binding activity, role in intracellular protein transport, protein transport, small GTPase mediated signal transduction and intracellular localization	0	0.678287	0.00011783	7.83784	4.57662e-06	1565	1376	1153	1770	857	1710	1615	1631	1941	3220	3731	2300	135.125	180.249	162.256	192.224	194.017	200.949	218.442	199.683	221.303	399.597	423.529	423.45
B9J08_002176	NA	NA	YBR138C	NA	mRNA Ortholog of S. cerevisiae : YBR138C, C. albicans SC5314 : C2_01930C_A, C. dubliniensis CD36 : Cd36_16750, C. parapsilosis CDC317 : CPAR2_212450 and Candida tenuis NRRL Y-1498 : CANTEDRAFT_92365	0	0.679652	0.00853062	4.90999	0.00090302	268	195	255	265	110	252	221	169	181	329	449	241	23.14	25.544	35.885	28.779	24.903	29.614	29.892	20.691	20.637	40.828	50.969	44.37
B9J08_003642	NA	NA	YET3	NA	mRNA Ortholog(s) have endoplasmic reticulum localization	0	0.680539	0.000426616	8.24979	2.20648e-05	3641	2535	2104	3890	1956	3348	1484	1304	1670	3028	3395	1705	314.372	332.073	296.086	422.458	442.82	393.437	200.723	159.648	190.405	375.77	385.387	313.906
B9J08_000447	CRZ2	NA	NA	CRZ1	mRNA Has domain(s) with predicted DNA binding, nucleic acid binding, zinc ion binding activity and role in DNA repair	0	0.68505	0.00145171	6.74097	0.000103714	784	523	478	1410	751	1137	633	698	629	1393	1339	808	67.692	68.511	67.267	153.127	170.019	133.614	85.618	85.456	71.716	172.869	151.998	148.76
B9J08_000901	NA	PDC11	NA	PDC1	mRNA Has domain(s) with predicted catalytic activity, magnesium ion binding, thiamine pyrophosphate binding activity	0	0.68771	0.00190027	7.65454	0.000145704	2380	2201	1880	4679	2129	4627	737	520	735	1343	1528	754	205.494	288.321	264.563	508.144	481.986	543.738	99.685	63.664	83.801	166.664	173.453	138.818
B9J08_003893	SST2	NA	SST2	NA	mRNA Ortholog(s) have GTPase activator activity	0	0.688718	0.00682043	4.40652	0.000691788	249	194	163	260	116	271	96	85	121	207	202	133	21.499	25.413	22.938	28.236	26.261	31.846	12.985	10.407	13.796	25.688	22.93	24.486
B9J08_004600	NA	NA	NA	ADH5	mRNA Has domain(s) with predicted oxidoreductase activity, transferase activity, transferring acyl groups other than amino-acyl groups, zinc ion binding activity and role in oxidation-reduction process	0	0.69037	0.0075597	5.41206	0.000778943	757	349	334	338	135	236	255	242	277	468	548	371	65.361	45.717	47.002	36.707	30.563	27.733	34.491	29.628	31.582	58.078	62.207	68.304
B9J08_004667	NA	NA	NA	NA	mRNA Ortholog of C. albicans SC5314 : C1_03660W_A, C. parapsilosis CDC317 : CPAR2_108915, Candida tenuis NRRL Y-1498 : CANTEDRAFT_102387 and Debaryomyces hansenii CBS767 : DEHA2B06776g	0	0.690403	0.000419034	6.86551	2.1504e-05	1112	935	968	1762	756	1502	535	478	617	960	1218	750	96.012	122.481	136.222	191.355	171.151	176.506	72.363	58.521	70.347	119.135	138.263	138.082
B9J08_000216	NA	NA	CPS1	NA	mRNA Ortholog(s) have carboxypeptidase activity, role in nitrogen compound metabolic process, proteolysis involved in cellular protein catabolic process and fungal-type vacuole lumen localization	0	0.692875	0.00828046	5.76724	0.000874873	538	482	357	466	201	513	357	245	389	512	683	563	46.452	63.14	50.239	50.608	45.505	60.285	48.287	29.995	44.352	63.538	77.532	103.653
B9J08_003750	NA	NA	NA	YEA6	mRNA Ortholog of C. albicans SC5314 : C3_04630W_A, C. dubliniensis CD36 : Cd36_84580, C. parapsilosis CDC317 : CPAR2_404290 and Candida tenuis NRRL Y-1498 : CANTEDRAFT_115338	0	0.695087	0.00176082	5.0389	0.000130051	277	127	137	205	79	170	279	277	391	553	700	443	23.917	16.636	19.279	22.263	17.885	19.977	37.737	33.913	44.58	68.627	79.461	81.56
B9J08_001382	NA	NA	YHR138C	NA	mRNA Ortholog(s) have endopeptidase inhibitor activity and role in vacuole fusion, non-autophagic	0	0.697496	0.00101611	9.5126	6.5232e-05	20706	12120	12515	12233	5832	8959	2158	1875	2351	3420	4650	3368	1787.8	1587.66	1761.18	1328.52	1320.31	1052.81	291.887	229.556	268.05	424.417	527.85	620.079
B9J08_003808	NA	YOR1	NA	YOR1	mRNA Has domain(s) with predicted ATP binding, ATPase activity, ATPase-coupled transmembrane transporter activity, nucleoside-triphosphatase activity, nucleotide binding activity and role in transmembrane transport	0	0.697835	0.00163771	6.2646	0.000119969	488	460	395	385	202	405	677	565	897	1138	1522	1128	42.135	60.258	55.586	41.811	45.731	47.593	91.57	69.173	102.272	141.224	172.772	207.675
B9J08_004018	NA	NA	NA	NA	mRNA Has domain(s) with predicted hydrolase activity	0	0.699826	0.00187047	6.43585	0.00014229	859	557	441	944	474	674	515	440	649	1121	1116	666	74.168	72.964	62.06	102.519	107.309	79.205	69.658	53.869	73.996	139.114	126.684	122.617
B9J08_003510	PRO3	NA	PRO3	NA	mRNA Ortholog(s) have pyrroline-5-carboxylate reductase activity, role in proline biosynthetic process and cytoplasm localization	0	0.701062	0.000508456	7.17029	2.78326e-05	1342	805	682	1001	499	1121	1073	912	1252	2059	2101	1610	115.871	105.451	95.975	108.71	112.969	131.733	145.132	111.656	142.747	255.519	238.497	296.415
B9J08_001315	NA	NA	DAL2	NA	mRNA Ortholog(s) have allantoicase activity and role in allantoin catabolic process	0	0.706515	0.00552978	6.12318	0.000529719	764	546	514	578	303	513	464	267	575	714	925	637	65.965	71.523	72.333	62.771	68.596	60.285	62.76	32.689	65.559	88.606	105.002	117.277
B9J08_005147	NA	NA	NA	NA	mRNA Ortholog of C. parapsilosis CDC317 : CPAR2_107030, Candida tenuis NRRL Y-1498 : CANTEDRAFT_95488, Debaryomyces hansenii CBS767 : DEHA2D16654g and Candida guilliermondii ATCC 6260 : PGUG_00622	0	0.710292	0.00808331	3.50618	0.000842656	71	44	37	62	47	50	112	101	125	209	272	140	6.13	5.764	5.207	6.733	10.64	5.876	15.149	12.365	14.252	25.937	30.876	25.775
B9J08_002296	NA	NA	NA	NA	mRNA Protein of unknown function	0	0.712479	0.000664	9.73412	3.88859e-05	21081	17040	11565	13746	8161	14794	2412	2148	2452	4067	5203	3484	1820.18	2232.16	1627.49	1492.83	1847.58	1738.51	326.242	262.979	279.565	504.709	590.624	641.435
B9J08_004259	ISC1	NA	ISC1	NA	mRNA Ortholog(s) have inositol phosphosphingolipid phospholipase activity, mannosyl-inositol phosphorylceramide phospholipase activity	0	0.712842	0.00395922	6.22496	0.000348195	1065	973	945	1357	535	1006	213	262	321	480	585	374	91.954	127.458	132.985	147.371	121.119	118.219	28.81	32.077	36.599	59.567	66.407	68.857
B9J08_001511	LMO1	NA	YLL007C	NA	mRNA Ortholog(s) have role in autophagy of mitochondrion, intracellular signal transduction and mitochondrion, plasma membrane localization	0	0.715095	0.00520056	5.19909	0.000491902	215	187	169	225	124	342	281	229	402	537	642	453	18.564	24.496	23.783	24.435	28.072	40.19	38.008	28.036	45.834	66.641	72.877	83.401
B9J08_001225	NA	NA	YDR089W	NA	mRNA Ortholog(s) have role in cellular phosphate ion homeostasis, polyphosphate biosynthetic process and integral component of fungal-type vacuolar membrane, vacuolar transporter chaperone complex localization	0	0.715307	0.00126697	6.51454	8.609e-05	845	812	601	670	321	733	603	521	631	967	1280	941	72.959	106.368	84.576	72.763	72.671	86.138	81.561	63.786	71.944	120.003	145.301	173.246
B9J08_002753	NA	NA	NA	NA	mRNA Protein of unknown function	0	0.725502	0.00131688	11.7231	9.06367e-05	28118	15528	14196	19829	9496	18694	28161	25704	38111	71167	59115	39068	2427.77	2034.09	1997.73	2153.45	2149.81	2196.81	3809	3146.94	4345.23	8831.72	6710.51	7192.77
B9J08_004902	NA	NA	RGD2	NA	mRNA Ortholog(s) have GTPase activator activity and role in establishment or maintenance of actin cytoskeleton polarity, small GTPase mediated signal transduction	0	0.727346	0.00285019	5.53045	0.000230585	418	246	306	425	122	348	300	342	341	594	733	479	36.091	32.225	43.062	46.155	27.62	40.895	40.577	41.871	38.879	73.715	83.207	88.188
B9J08_004937	NA	NA	NA	NA	mRNA Ortholog of C. albicans SC5314 : C1_00880W_A, C. dubliniensis CD36 : Cd36_00830, C. parapsilosis CDC317 : CPAR2_110060 and Debaryomyces hansenii CBS767 : DEHA2D09944g	0	0.727745	0.00801132	5.65251	0.000830314	683	366	368	681	234	438	210	260	314	573	495	367	58.972	47.944	51.787	73.957	52.975	51.471	28.404	31.832	35.801	71.108	56.19	67.568
B9J08_001861	FAT1	NA	FAT1	NA	mRNA Ortholog(s) have long-chain fatty acid transporter activity, very long-chain fatty acid-CoA ligase activity	0	0.730824	0.00415458	5.33701	0.000368468	746	455	387	475	197	402	207	132	190	334	360	268	64.411	59.603	54.461	51.585	44.599	47.241	27.998	16.161	21.663	41.449	40.866	49.341
B9J08_000936	MNN45	NA	NA	MNN4	mRNA Ortholog of C. albicans SC5314 : C6_02830W_A/MNN45, C. dubliniensis CD36 : Cd36_63280, Candida tenuis NRRL Y-1498 : CANTEDRAFT_101612 and Debaryomyces hansenii CBS767 : DEHA2E01430g	0	0.736543	0.00023428	6.74229	1.04669e-05	1048	781	870	1198	460	934	566	537	694	1169	1271	870	90.487	102.307	122.431	130.104	104.14	109.758	76.556	65.745	79.127	145.071	144.279	160.175
B9J08_003232	CIS2	NA	ECM38	NA	mRNA Ortholog(s) have glutathione hydrolase activity, role in glutathione catabolic process, xenobiotic metabolic process and fungal-type vacuole localization	0	0.736558	0.0032065	6.26383	0.000265864	1263	595	563	808	351	598	381	388	444	835	945	501	109.05	77.942	79.228	87.75	79.463	70.273	51.533	47.503	50.623	103.622	107.273	92.239
B9J08_002149	YPS7	NA	YPS7	NA	mRNA Ortholog(s) have role in fungal-type cell wall organization	0	0.740276	0.000192593	6.68914	8.21689e-06	568	489	454	532	301	608	860	934	1147	2028	2025	1381	49.042	64.057	63.889	57.776	68.144	71.449	116.322	114.349	130.775	251.672	229.87	254.254
B9J08_001896	NA	NA	SRF1	NA	mRNA Ortholog(s) have role in positive regulation of catalytic activity	0	0.744114	0.000875035	5.52747	5.45906e-05	508	414	351	621	268	553	206	225	215	416	524	274	43.862	54.232	49.395	67.441	60.673	64.985	27.863	27.547	24.513	51.625	59.482	50.446
B9J08_004741	NA	orf19.1449	NA	DDI3	mRNA Has domain(s) with predicted catalytic activity, metal ion binding, phosphoric diester hydrolase activity	0	0.752194	0.00423431	4.83583	0.0003775	306	197	234	222	99	237	197	149	175	299	364	309	26.421	25.806	32.93	24.109	22.413	27.851	26.646	18.242	19.953	37.105	41.32	56.89
B9J08_004382	ECM331	NA	NA	ECM33	mRNA Ortholog of C. albicans SC5314 : C5_02460C_A/ECM331, C. dubliniensis CD36 : Cd36_52240, C. parapsilosis CDC317 : CPAR2_100710/ECM331 and Candida tenuis NRRL Y-1498 : CANTEDRAFT_117002	0	0.752619	0.000225532	8.4008	9.93994e-06	2865	2434	2269	2430	1204	2522	2476	1762	2649	4207	5064	3424	247.37	318.842	319.306	263.9	272.575	296.371	334.899	215.721	302.026	522.083	574.846	630.389
B9J08_004871	NA	NA	NA	NA	mRNA Ortholog of C. albicans SC5314 : C7_01500W_A, C. dubliniensis CD36 : Cd36_71340, C. parapsilosis CDC317 : CPAR2_301350 and Candida tenuis NRRL Y-1498 : CANTEDRAFT_114098	0	0.754724	0.000528594	5.36431	2.94875e-05	435	354	331	380	177	364	216	185	282	418	491	360	37.559	46.372	46.58	41.268	40.071	42.775	29.216	22.65	32.152	51.873	55.736	66.279
B9J08_002137	NA	NA	SRC1	NA	mRNA Ortholog(s) have role in establishment of mitotic sister chromatid cohesion, maintenance of rDNA, meiotic attachment of telomere to nuclear envelope, mitotic sister chromatid segregation, nuclear envelope organization	0	0.754729	3.3313e-05	7.38174	9.39e-07	1937	1383	1272	2221	1144	1989	703	679	906	1485	1753	1055	167.245	181.166	179.002	241.203	258.991	233.736	95.086	83.13	103.298	184.286	198.994	194.235
B9J08_005437	NA	orf19.6200	NA	PRY2	mRNA Ortholog of Candida lusitaniae ATCC 42720 : CLUG_05687	0	0.75589	0.000101635	8.07766	3.72258e-06	2592	1510	1752	1713	878	1400	1953	1853	2360	4124	4451	2956	223.799	197.803	246.551	186.033	198.771	164.52	264.159	226.862	269.076	511.782	505.26	544.226
B9J08_000159	MSB2	NA	MSB2	NA	mRNA Ortholog(s) have osmosensor activity and role in establishment of cell polarity, hyperosmotic response, osmosensory signaling pathway via Sho1 osmosensor, response to osmotic stress, signal transduction involved in filamentous growth	0	0.762941	0.00184678	7.12438	0.000138258	592	572	529	687	280	796	1700	1152	1879	3154	3151	2392	51.115	74.929	74.444	74.609	63.389	93.541	229.939	141.039	214.234	391.407	357.689	440.388
B9J08_002011	NA	NA	FMO1	NA	mRNA Ortholog(s) have N,N-dimethylaniline monooxygenase activity, role in protein folding and endoplasmic reticulum membrane localization	0	0.763161	0.00500717	5.02733	0.000466556	412	235	299	449	174	297	148	159	162	334	327	224	35.573	30.784	42.077	48.762	39.392	34.902	20.018	19.466	18.47	41.449	37.12	41.24
B9J08_004729	BEM2	NA	BEM2	NA	mRNA Ortholog(s) have GTPase activator activity and role in actin cytoskeleton organization, morphogenesis checkpoint, negative regulation of Rho protein signal transduction	0	0.764865	9.23983e-05	7.32766	3.27271e-06	1681	1202	1099	1468	616	1429	1024	861	951	1748	2181	1422	145.141	157.456	154.657	159.426	139.457	167.928	138.504	105.412	108.428	216.924	247.579	261.803
B9J08_000350	NA	NA	NA	NA	mRNA Has domain(s) with predicted oxidoreductase activity	0	0.785408	0.000643814	5.20855	3.70559e-05	173	149	153	261	146	333	315	240	379	595	702	473	14.937	19.518	21.531	28.345	33.053	39.132	42.606	29.383	43.212	73.839	79.688	87.084
B9J08_004838	NA	PST3	NA	PST2	mRNA Has domain(s) with predicted FMN binding, NAD(P)H dehydrogenase (quinone) activity, oxidoreductase activity and role in negative regulation of transcription, DNA-templated	0	0.785992	0.00633909	7.4454	0.000631485	2623	2049	1775	2918	1268	2590	730	387	829	1066	1316	1156	226.476	268.409	249.787	316.898	287.064	304.362	98.738	47.38	94.519	132.289	149.387	212.83
B9J08_004398	GDE1	NA	GDE1	NA	mRNA Ortholog(s) have glycerophosphocholine phosphodiesterase activity and role in glycerophospholipid catabolic process	0	0.787556	0.000364887	8.07956	1.77732e-05	2653	2441	2222	2864	1349	2813	1550	1163	1404	2407	3284	2173	229.066	319.759	312.691	311.033	305.401	330.567	209.65	142.386	160.077	298.705	372.787	400.069
B9J08_003624	DCK1	NA	YLR422W	NA	mRNA Ortholog(s) have role in autophagy of mitochondrion, intracellular signal transduction and mitochondrion, plasma membrane localization	0	0.803093	1.85529e-05	6.52977	4.56e-07	652	520	473	756	347	632	644	624	752	1380	1502	1023	56.295	68.118	66.563	82.102	78.558	74.269	87.106	76.396	85.739	171.256	170.501	188.343
B9J08_001906	NA	NA	DIG2	NA	mRNA Ortholog(s) have transcription factor binding activity	0	0.804992	0.00335166	4.74635	0.00028007	321	239	263	254	112	289	126	113	155	283	257	226	27.716	31.308	37.011	27.585	25.356	33.962	17.043	13.835	17.672	35.12	29.174	41.609
B9J08_001648	ARO8	NA	ARO8	NA	mRNA Ortholog(s) have 2-aminoadipate transaminase activity, aromatic-amino-acid:2-oxoglutarate aminotransferase activity	0	0.811681	0.00049068	7.71448	2.63658e-05	2140	1446	1266	1761	863	1781	1086	1161	1644	2117	3007	2330	184.772	189.419	178.158	191.246	195.375	209.293	146.89	142.141	187.441	262.717	341.343	428.974
B9J08_003175	NA	NA	BOP3	NA	mRNA Ortholog(s) have role in cellular response to methylmercury	0	0.815153	0.00119825	5.56599	8.05423e-05	478	439	452	552	210	495	195	219	277	448	528	366	41.272	57.507	63.608	59.948	47.542	58.17	26.375	26.812	31.582	55.596	59.937	67.384
B9J08_002991	NA	NA	NA	YML079W	mRNA Protein of unknown function	0	0.817836	0.000108482	6.40068	4.04794e-06	1009	726	664	1195	489	1229	327	369	398	731	853	556	87.119	95.103	93.442	129.778	110.705	144.425	44.229	45.177	45.378	90.716	96.829	102.365
B9J08_001940	NA	NA	HSP12	NA	mRNA Ortholog(s) have lipid binding activity and role in cell adhesion, cellular response to heat, cellular response to osmotic stress, cellular response to oxidative stress, plasma membrane organization	0	0.81977	0.000227201	12.8524	1.00592e-05	107801	84777	67704	144447	71243	107456	28055	21108	26100	54361	60162	34369	9307.77	11105.4	9527.66	15687.1	16128.8	12627.6	3794.66	2584.25	2975.8	6746.12	6829.36	6327.64
B9J08_002575	NA	VPS70	NA	VPS70	mRNA Has domain(s) with predicted peptidase activity and role in proteolysis	0	0.823546	0.000106212	7.0392	3.91163e-06	1781	1270	1099	1454	768	1320	603	478	725	1089	1421	998	153.775	166.364	154.657	157.906	173.868	155.119	81.561	58.521	82.661	135.143	161.306	183.741
B9J08_000361	NA	NA	NA	NA	mRNA Protein of unknown function	0	0.824221	7.75698e-05	5.63018	2.60465e-06	278	210	212	292	114	239	546	416	506	1079	1115	697	24.003	27.509	29.834	31.711	25.809	28.086	73.851	50.931	57.692	133.902	126.57	128.324
B9J08_001828	NA	NA	YDL144C	NA	mRNA Has domain(s) with predicted 2-dehydropantoate 2-reductase activity, NADP binding, coenzyme binding, oxidoreductase activity, oxidoreductase activity, acting on the CH-OH group of donors, NAD or NADP as acceptor activity	0	0.829356	0.00543369	6.51204	0.000517234	512	600	467	711	333	825	691	449	851	1088	1578	1157	44.207	78.597	65.719	77.215	75.388	96.949	93.463	54.971	97.027	135.019	179.128	213.014
B9J08_000989	NA	orf19.2446	NA	YDL144C	mRNA Has domain(s) with predicted 2-dehydropantoate 2-reductase activity, NADP binding, coenzyme binding, oxidoreductase activity, oxidoreductase activity, acting on the CH-OH group of donors, NAD or NADP as acceptor activity	0	0.842403	1.85529e-05	5.771	4.47e-07	232	161	125	168	91	153	882	751	915	1906	1963	1231	20.031	21.09	17.591	18.245	20.602	17.98	119.298	91.945	104.324	236.532	222.832	226.638
B9J08_005109	NA	NA	TCB1	NA	mRNA Ortholog(s) have lipid binding activity, role in endoplasmic reticulum membrane organization, regulation of phosphatidylinositol dephosphorylation and cortical endoplasmic reticulum localization	0	0.846027	0.000116531	8.20275	4.47924e-06	3117	1962	1881	2820	1276	1918	1864	1706	1756	3686	4354	2663	269.129	257.013	264.704	306.255	288.875	225.392	252.121	208.865	200.211	457.427	494.249	490.282
B9J08_001345	NA	NA	ADK2	NA	mRNA Ortholog(s) have adenylate kinase activity, nucleoside triphosphate adenylate kinase activity, role in nucleotide metabolic process and mitochondrial inner membrane, mitochondrial matrix localization	0	0.846781	0.00292259	5.33811	0.000238206	426	380	242	514	267	524	159	149	254	344	421	340	36.782	49.778	34.056	55.821	60.446	61.577	21.506	18.242	28.96	42.69	47.79	62.597
B9J08_005339	NA	NA	NA	NA	mRNA Has domain(s) with predicted catalytic activity	0	0.855409	2.72402e-05	8.29748	7.4e-07	3352	2306	2157	4385	1825	3664	1587	1171	1776	3129	3469	2379	289.419	302.075	303.544	476.215	413.163	430.572	214.654	143.365	202.491	388.304	393.787	437.995
B9J08_003006	NA	NA	JLP2	NA	mRNA Ortholog of S. cerevisiae : JLP2, C. albicans SC5314 : C6_04260C_A, C. glabrata CBS138 : CAGL0K03883g, C. dubliniensis CD36 : Cd36_64880 and C. parapsilosis CDC317 : CPAR2_600350	0	0.860283	0.0072206	3.92018	0.000736737	142	108	92	153	76	80	91	80	104	185	221	150	12.261	14.147	12.947	16.616	17.206	9.401	12.308	9.794	11.858	22.958	25.087	27.616
B9J08_003179	NA	NA	XBP1	NA	mRNA Ortholog(s) have DNA-binding transcription factor activity, DNA-binding transcription factor activity, RNA polymerase II-specific activity	0	0.861451	0.0035465	5.32972	0.000304047	213	111	81	564	194	289	349	261	437	692	836	556	18.391	14.54	11.399	61.251	43.92	33.962	47.205	31.954	49.825	85.876	94.899	102.365
B9J08_001920	NA	STB5	NA	GAL4	mRNA Has domain(s) with predicted DNA binding, DNA-binding transcription factor activity, RNA polymerase II-specific, zinc ion binding activity and role in regulation of transcription, DNA-templated, transcription, DNA-templated	0	0.877677	3.046e-05	6.41951	8.46e-07	532	411	323	609	260	569	765	682	694	1561	1657	1141	45.934	53.839	45.454	66.138	58.862	66.866	103.472	83.497	79.127	193.718	188.096	210.068
B9J08_005424	KCH1	NA	KCH1	NA	mRNA Ortholog(s) have potassium ion transmembrane transporter activity, role in potassium ion transmembrane transport and integral component of plasma membrane, mating projection localization	0	0.903308	0.000681139	7.41722	4.04379e-05	2826	1254	1237	1719	820	1518	826	754	936	2268	1925	1151	244.003	164.268	174.077	186.685	185.64	178.387	111.723	92.312	106.718	281.456	218.519	211.909
B9J08_003007	NA	NA	NA	NA	mRNA Has domain(s) with predicted intracellular localization	0	0.906643	0.000132201	4.66073	5.24122e-06	125	117	102	117	59	128	260	201	303	488	669	430	10.793	15.326	14.354	12.706	13.357	15.042	35.167	24.608	34.547	60.56	75.942	79.167
B9J08_003408	NA	orf19.4116	NA	NA	mRNA Has domain(s) with predicted alcohol O-acetyltransferase activity and role in alcohol metabolic process	0	0.910758	0.00111763	6.54242	7.35487e-05	3034	1666	1709	1936	724	1403	260	209	208	436	584	386	261.962	218.238	240.499	210.251	163.907	164.872	35.167	25.588	23.715	54.107	66.293	71.066
B9J08_005329	YIM1	NA	YIM1	NA	mRNA Ortholog(s) have role in cellular response to DNA damage stimulus and lipid droplet localization	0	0.925142	0.000768223	6.2089	4.62263e-05	667	689	538	1294	622	1668	261	250	302	549	686	478	57.59	90.256	75.71	140.53	140.815	196.014	35.302	30.607	34.433	68.13	77.872	88.004
B9J08_001143	HEM15	NA	HEM15	NA	mRNA Ortholog(s) have 2 iron, 2 sulfur cluster binding, ferrochelatase activity, role in heme biosynthetic process and mitochondrial inner membrane localization	0	0.92718	1.81865e-05	8.97011	4.16e-07	4511	4100	3584	5720	2458	5590	2603	2290	2586	5284	6303	4195	389.49	537.08	504.359	621.197	556.469	656.904	352.077	280.364	294.843	655.737	715.492	772.337
B9J08_004962	FGR22	NA	NA	NA	mRNA Has domain(s) with predicted phosphoric diester hydrolase activity and role in lipid metabolic process	0	0.928979	1.40255e-05	7.72027	2.96e-07	2781	1663	1497	2075	1031	2198	950	894	1264	2376	2614	1576	240.118	217.845	210.666	225.347	233.409	258.296	128.495	109.452	144.115	294.858	296.731	290.156
B9J08_005257	NA	NA	NA	NA	mRNA Protein of unknown function	0	0.934843	0.00415458	3.96235	0.000369521	77	67	87	148	67	143	95	139	93	258	237	181	6.648	8.777	12.243	16.073	15.168	16.805	12.85	17.018	10.603	32.017	26.903	33.324
B9J08_003015	NA	orf19.1433	NA	LPX1	mRNA Ortholog of Debaryomyces hansenii CBS767 : DEHA2E09218g	0	0.938872	0.000781637	5.88286	4.71908e-05	402	465	392	585	296	630	362	237	374	662	815	564	34.71	60.913	55.164	63.532	67.012	74.034	48.963	29.016	42.642	82.153	92.516	103.837
B9J08_001426	PGA54	NA	NA	NA	mRNA Ortholog of C. albicans SC5314 : C4_03070W_A/PGA54, C. dubliniensis CD36 : Cd36_42920, C. parapsilosis CDC317 : CPAR2_401560 and Debaryomyces hansenii CBS767 : DEHA2G18964g	0	0.94262	9.58038e-05	7.80491	3.45117e-06	1015	1040	904	1332	634	1411	2222	1585	2287	4342	5515	3153	87.637	136.235	127.216	144.656	143.532	165.812	300.543	194.051	260.753	538.836	626.041	580.495
B9J08_002829	DBF2	NA	DBF2	NA	mRNA Ortholog(s) have protein kinase activity, protein kinase activity involved in regulation of protein localization to cell division site involved in cytokinesis, protein serine/threonine kinase activity	0	0.942906	0.000139718	5.04275	5.6798e-06	263	176	148	229	123	241	241	169	308	504	589	411	22.708	23.055	20.827	24.87	27.846	28.321	32.597	20.691	35.117	62.546	66.861	75.669
B9J08_004292	CAR1	NA	CAR1	NA	mRNA Ortholog(s) have arginase activity, manganese ion binding, ornithine carbamoyltransferase inhibitor activity, zinc ion binding activity	0	0.951296	0.000135508	7.80351	5.42686e-06	1623	927	946	928	401	797	2332	1724	3240	4695	6101	4337	140.133	121.433	133.126	100.782	90.783	93.659	315.422	211.069	369.409	582.643	692.562	798.48
B9J08_002466	BUD14	NA	BUD14	NA	mRNA Ortholog(s) have protein phosphatase regulator activity	0	0.952196	0.00117711	5.74049	7.8648e-05	426	457	383	517	297	648	322	193	292	603	625	470	36.782	59.865	53.898	56.147	67.238	76.149	43.553	23.629	33.292	74.831	70.948	86.531
B9J08_004451	NA	IFF4	NA	YIL169C	mRNA Protein of unknown function	0	0.953205	0.00148539	11.3499	0.000106718	6151	7790	7047	39431	17476	43276	21497	15031	21021	44370	45080	32431	531.091	1020.45	991.691	4282.24	3956.41	5085.54	2907.64	1840.24	2396.71	5506.25	5117.31	5970.84
B9J08_002139	NBP2	NA	NBP2	NA	mRNA Ortholog(s) have protein-macromolecule adaptor activity, role in inactivation of MAPK activity, negative regulation of MAPK cascade and cytoplasm localization	0	0.95795	0.00177451	6.27725	0.000131419	834	930	717	1055	448	1075	278	365	273	620	733	585	72.009	121.826	100.9	114.574	101.423	126.328	37.602	44.687	31.126	76.941	83.207	107.704
B9J08_005576	NA	NA	NA	NA	mRNA Protein of unknown function	0	0.959049	0.00374186	4.76759	0.000323808	267	199	229	313	111	295	166	104	145	378	371	164	23.053	26.068	32.226	33.992	25.129	34.667	22.453	12.733	16.532	46.909	42.114	30.194
B9J08_002730	NA	NA	NA	NA	mRNA Ortholog of C. albicans SC5314 : C4_04330C_A, C. dubliniensis CD36 : Cd36_44000, Pichia stipitis Pignal : PICST_68255, Candida tropicalis MYA-3404 : CTRG_03936 and Candida albicans WO-1 : CAWG_03374	0	0.962545	0.000252479	8.13166	1.15849e-05	5854	2853	2634	2977	1395	1996	1105	1193	1302	2596	3139	2056	505.447	373.729	370.67	323.305	315.815	234.558	149.46	146.059	148.448	322.16	356.327	378.528
B9J08_000595	NA	NA	NA	NA	mRNA Ortholog of C. albicans SC5314 : C1_06350W_A, C. dubliniensis CD36 : Cd36_05930, C. parapsilosis CDC317 : CPAR2_803870 and Candida tenuis NRRL Y-1498 : CANTEDRAFT_112418	0	0.975881	0.000514117	5.41163	2.85041e-05	243	245	205	326	157	311	252	288	380	580	744	666	20.981	32.094	28.849	35.404	35.543	36.547	34.085	35.26	43.326	71.977	84.456	122.617
B9J08_005062	NA	NA	NA	AMD2	mRNA Has domain(s) with predicted carbon-nitrogen ligase activity, with glutamine as amido-N-donor, hydrolase activity	0	0.979564	0.000135496	5.78056	5.39911e-06	262	136	146	206	78	176	662	636	1113	1538	2213	1407	22.622	17.815	20.546	22.372	17.658	20.682	89.541	77.865	126.899	190.864	251.211	259.041
B9J08_000024	NA	NA	NA	NA	mRNA Protein of unknown function	0	0.989177	3.58861e-05	6.32055	1.04719e-06	812	643	727	619	369	707	369	387	480	910	1103	708	70.11	84.23	102.307	67.224	83.538	83.083	49.91	47.38	54.727	112.93	125.208	130.349
B9J08_002588	NA	NA	PNS1	NA	mRNA Has domain(s) with predicted sodium:dicarboxylate symporter activity, role in dicarboxylic acid transport and integral component of membrane localization	0	0.99334	8.90252e-06	7.34011	1.59e-07	1779	1415	1154	1993	872	2143	757	606	781	1703	1876	1168	153.603	185.358	162.397	216.442	197.413	251.833	102.39	74.192	89.046	211.34	212.956	215.039
B9J08_001622	GRP2	NA	NA	GRE2	mRNA Has domain(s) with predicted catalytic activity, coenzyme binding activity and role in cellular metabolic process	0	0.997658	1.75817e-05	7.22191	3.96e-07	956	640	535	793	446	856	1131	1161	1734	2816	3628	2345	82.543	83.837	75.288	86.121	100.97	100.592	152.977	142.141	197.702	349.462	411.836	431.735
B9J08_005552	NA	orf19.5711	NA	CSR1	mRNA Ortholog of Candida tenuis NRRL Y-1498 : CANTEDRAFT_121681, Candida guilliermondii ATCC 6260 : PGUG_00029 and Candida lusitaniae ATCC 42720 : CLUG_04099	0	1.02146	6.51335e-05	6.73911	2.04076e-06	869	494	581	498	238	594	910	666	1164	1975	2329	1706	75.031	64.712	81.761	54.083	53.881	69.803	123.085	81.538	132.714	245.095	264.379	314.09
B9J08_000144	NA	NA	YPL113C	NA	mRNA Ortholog(s) have oxidoreductase activity, acting on the CH-OH group of donors, NAD or NADP as acceptor activity	0	1.02283	7.16008e-06	6.91509	1.24e-07	1274	835	833	1894	1020	1829	432	419	605	1064	1269	909	110	109.381	117.224	205.69	230.919	214.933	58.431	51.298	68.979	132.041	144.052	167.355
B9J08_002419	NA	NA	NA	NA	mRNA Has domain(s) with predicted 2-oxoglutarate-dependent dioxygenase activity and role in oxidation-reduction process	0	1.02404	0.00106491	4.19327	6.87938e-05	260	122	152	169	67	164	98	84	93	219	228	174	22.449	15.981	21.39	18.354	15.168	19.272	13.255	10.284	10.603	27.178	25.882	32.035
B9J08_002297	NA	TNA1	NA	TNA1	mRNA Has domain(s) with predicted transmembrane transporter activity, role in transmembrane transport and integral component of membrane localization	0	1.03295	6.83891e-05	5.45253	2.21587e-06	499	273	252	315	178	305	264	254	270	542	780	482	43.085	35.762	35.463	34.209	40.298	35.842	35.708	31.097	30.784	67.261	88.543	88.74
B9J08_004804	HPD1	NA	NA	NA	mRNA Has domain(s) with predicted NADP binding, coenzyme binding, oxidoreductase activity, acting on the CH-OH group of donors, NAD or NADP as acceptor, phosphogluconate dehydrogenase (decarboxylating) activity	0	1.04052	0.000116531	8.42798	4.45901e-06	1136	1042	1180	1310	532	876	4643	3947	6122	11126	14101	8211	98.085	136.497	166.056	142.267	120.44	102.942	628.003	483.23	698.001	1380.72	1600.69	1511.72
B9J08_000802	NA	NA	YGR026W	NA	mRNA Ortholog of S. cerevisiae : YGR026W, C. albicans SC5314 : CR_06170W_A, C. glabrata CBS138 : CAGL0J00187g, C. dubliniensis CD36 : Cd36_31700 and C. parapsilosis CDC317 : CPAR2_204920	0	1.05069	0.00019221	6.01437	8.16185e-06	489	450	353	503	248	737	361	296	491	917	1081	628	42.221	58.948	49.676	54.626	56.145	86.608	48.828	36.239	55.981	113.798	122.711	115.62
B9J08_003614	ADH2	NA	ADH1	NA	mRNA Ortholog(s) have alcohol dehydrogenase (NAD+) activity, melatonin binding, methylglyoxal reductase (NADH-dependent) activity	0	1.05138	0.000211959	6.14997	9.2564e-06	571	411	315	793	376	790	367	331	483	706	1147	872	49.301	53.839	44.328	86.121	85.123	92.836	49.64	40.524	55.069	87.614	130.203	160.543
B9J08_002715	NA	NA	BOR1	NA	mRNA Ortholog(s) have borate efflux transmembrane transporter activity, role in borate transport, protein targeting to vacuole and fungal-type vacuole, plasma membrane localization	0	1.05196	0.000110838	5.66136	4.19351e-06	537	402	298	595	293	609	178	274	255	594	605	404	46.366	52.66	41.936	64.618	66.332	71.566	24.076	33.546	29.074	73.715	68.677	74.38
B9J08_000594	NA	NA	NA	NA	mRNA Has domain(s) with predicted phosphatidylinositol binding activity and role in cell communication	0	1.05771	1.31215e-06	6.6221	1.29e-08	620	497	430	951	414	943	632	562	705	1530	1772	1100	53.532	65.105	60.512	103.279	93.726	110.816	85.483	68.806	80.381	189.871	201.151	202.52
B9J08_000592	UME6	NA	NA	UME6	mRNA Has domain(s) with predicted DNA-binding transcription factor activity, RNA polymerase II-specific, zinc ion binding activity, role in regulation of transcription, DNA-templated and host cell nucleus, nucleus localization	0	1.05859	3.16423e-06	7.38705	4.39e-08	568	526	420	1456	595	1303	1491	1445	1651	3984	4053	2625	49.042	68.903	59.105	158.123	134.703	153.121	201.67	176.911	188.239	494.409	460.081	483.286
B9J08_000139	MNN42	NA	NA	YJR061W	mRNA Ortholog of C. albicans SC5314 : C2_03690C_A/MNN42, C. dubliniensis CD36 : Cd36_18380, C. parapsilosis CDC317 : CPAR2_207770 and Candida tenuis NRRL Y-1498 : CANTEDRAFT_137250	0	1.06001	0.00587927	4.30284	0.000572445	316	234	249	334	110	262	50	66	80	206	155	99	27.284	30.653	35.041	36.273	24.903	30.789	6.763	8.08	9.121	25.564	17.595	18.227
B9J08_004118	NA	NA	NA	YDR338C	mRNA Has domain(s) with predicted antiporter activity, xenobiotic transmembrane transporter activity, role in drug transmembrane transport and membrane localization	0	1.06059	9.81914e-06	5.94814	1.85e-07	427	360	342	511	250	579	400	353	381	882	1045	697	36.868	47.158	48.128	55.495	56.598	68.041	54.103	43.218	43.44	109.455	118.624	128.324
B9J08_003914	NA	NA	SFK1	NA	mRNA Ortholog(s) have role in actin cytoskeleton organization, inositol lipid-mediated signaling, negative regulation of phospholipid translocation, vacuole organization and plasma membrane localization	0	1.10719	2.43386e-06	6.28522	2.98e-08	956	644	554	921	405	833	328	319	381	792	1042	638	82.543	84.361	77.962	100.021	91.688	97.889	44.365	39.055	43.44	98.286	118.284	117.461
B9J08_004987	NA	NA	NA	NA	mRNA Ortholog of C. albicans SC5314 : C1_01510W_B, C. dubliniensis CD36 : Cd36_01380, C. parapsilosis CDC317 : CPAR2_109270 and Candida tenuis NRRL Y-1498 : CANTEDRAFT_93810	0	1.15655	0.00050296	5.05696	2.71728e-05	350	204	224	833	302	511	111	128	117	321	361	202	30.22	26.723	31.522	90.465	68.37	60.05	15.014	15.671	13.34	39.836	40.979	37.19
B9J08_000438	NA	PGA30	NA	NA	mRNA Protein of unknown function	0	1.16792	1.00098e-05	3.39641	1.91e-07	36	25	31	12	9	10	210	243	239	554	666	497	3.108	3.275	4.362	1.303	2.038	1.175	28.404	29.75	27.25	68.751	75.602	91.502
B9J08_002891	CAT8	NA	CAT8	NA	mRNA Ortholog(s) have DNA-binding transcription activator activity, RNA polymerase II-specific, DNA-binding transcription factor activity and RNA polymerase II cis-regulatory region sequence-specific DNA binding, more	0	1.17255	0.00111763	3.51928	7.32275e-05	76	72	62	131	56	93	63	60	63	162	157	152	6.562	9.432	8.725	14.227	12.678	10.929	8.521	7.346	7.183	20.104	17.822	27.985
B9J08_004551	NA	PRB1	NA	PRB1	mRNA Has domain(s) with predicted identical protein binding, serine-type endopeptidase activity and role in negative regulation of catalytic activity, proteolysis	0	1.19709	0.000301436	7.37242	1.41952e-05	1962	1258	1241	1601	606	1159	960	549	1108	1759	2457	2177	169.403	164.792	174.64	173.87	137.193	136.199	129.848	67.214	126.329	218.289	278.909	400.805
B9J08_004089	RFG1	NA	ROX1	NA	mRNA Ortholog(s) have DNA binding, bending, DNA-binding transcription repressor activity, RNA polymerase II-specific, cis-regulatory region sequence-specific DNA binding, sequence-specific DNA binding, transcription corepressor activity	0	1.21144	3.14806e-06	5.52728	4.26e-08	225	172	168	451	195	449	311	252	391	758	1009	670	19.427	22.531	23.642	48.979	44.146	52.764	42.065	30.852	44.58	94.067	114.538	123.353
B9J08_004580	NA	NA	YPL199C	NA	mRNA Ortholog of S. cerevisiae : YPL199C, C. albicans SC5314 : C2_06920C_A, C. glabrata CBS138 : CAGL0G09108g, C. dubliniensis CD36 : Cd36_21210 and C. parapsilosis CDC317 : CPAR2_406880	0	1.21364	0.000139259	4.92947	5.63315e-06	294	220	243	256	126	262	130	109	242	377	477	338	25.385	28.819	34.196	27.802	28.525	30.789	17.584	13.345	27.592	46.785	54.147	62.229
B9J08_000169	NA	NA	SRX1	NA	mRNA Ortholog(s) have sulfiredoxin activity and role in cellular protein localization, cellular response to oxidative stress	0	1.21432	1.35119e-05	7.32546	2.77e-07	1678	1591	1405	2713	1471	3222	433	528	556	1238	1749	964	144.882	208.413	197.719	294.634	333.021	378.631	58.567	64.643	63.392	153.634	198.54	177.481
B9J08_001287	NA	NA	NA	NA	mRNA Protein of unknown function	0	1.21815	2.08451e-05	4.5819	5.21e-07	154	110	87	155	76	145	135	192	233	504	609	326	13.297	14.409	12.243	16.833	17.206	17.04	18.26	23.507	26.566	62.546	69.131	60.02
B9J08_004946	HGC1	NA	CLN2	NA	mRNA Ortholog(s) have cyclin-dependent protein serine/threonine kinase regulator activity	0	1.22787	3.27705e-06	6.82005	4.75e-08	123	120	139	479	261	584	1930	1803	2481	5296	6180	4468	10.62	15.719	19.561	52.02	59.088	68.628	261.048	220.741	282.872	657.226	701.53	822.599
B9J08_003950	TEC1	NA	TEC1	NA	mRNA Ortholog(s) have DNA-binding transcription activator activity, RNA polymerase II-specific, RNA polymerase II cis-regulatory region sequence-specific DNA binding activity	0	1.24218	8.75e-07	6.97789	6.69e-09	1443	1060	975	1289	606	1446	497	469	664	1387	1748	1123	124.592	138.855	137.207	139.987	137.193	169.925	67.223	57.42	75.706	172.125	198.426	206.754
B9J08_003051	BMT8	NA	NA	NA	mRNA Has domain(s) with predicted mannosyltransferase activity	0	1.25305	1.1879e-05	6.17281	2.34e-07	698	589	458	651	342	766	409	259	366	876	1061	754	60.267	77.156	64.452	70.699	77.426	90.016	55.321	31.709	41.73	108.71	120.441	138.818
B9J08_004445	NA	NA	PHR1	NA	mRNA Ortholog(s) have deoxyribodipyrimidine photo-lyase activity, mRNA binding activity	0	1.26726	0.00111763	4.75819	7.34148e-05	385	243	176	426	244	430	66	76	132	210	274	236	33.242	31.832	24.768	46.264	55.239	50.531	8.927	9.305	15.05	26.061	31.103	43.45
B9J08_000501	PHM7	NA	PHM7	NA	mRNA Has domain(s) with predicted membrane localization	0	1.28864	7.16008e-06	6.75278	1.23e-07	1067	901	756	1099	589	1398	479	447	435	1126	1571	1006	92.127	118.027	106.388	119.352	133.344	164.285	64.789	54.726	49.597	139.735	178.334	185.214
B9J08_000349	NA	NA	NA	NA	mRNA Ortholog of C. albicans SC5314 : C5_03710C_A, C. dubliniensis CD36 : Cd36_53450, C. parapsilosis CDC317 : CPAR2_302910 and Candida tenuis NRRL Y-1498 : CANTEDRAFT_115875	0	1.31198	1.10074e-05	4.06952	2.13e-07	117	55	43	68	24	49	205	150	221	534	691	373	10.102	7.205	6.051	7.385	5.433	5.758	27.728	18.364	25.197	66.269	78.44	68.673
B9J08_000871	LAP3	NA	LAP3	NA	mRNA Ortholog(s) have RNA polymerase II cis-regulatory region sequence-specific DNA binding, cysteine-type peptidase activity, double-stranded DNA binding, mRNA binding, single-stranded DNA binding activity	0	1.32799	1.68818e-06	6.72858	1.87e-08	1346	954	924	2231	1091	2340	333	226	333	807	1089	598	116.217	124.969	130.03	242.289	246.992	274.983	45.041	27.669	37.967	100.148	123.619	110.097
B9J08_000857	PPS1	NA	NA	PPS1	mRNA Has domain(s) with predicted protein tyrosine/serine/threonine phosphatase activity and role in protein dephosphorylation	0	1.3821	2.74294e-05	2.0095	7.51e-07	8	2	8	4	2	9	114	84	136	343	373	246	0.691	0.262	1.126	0.434	0.453	1.058	15.419	10.284	15.506	42.566	42.342	45.291
B9J08_002848	MIH1	NA	MIH1	NA	mRNA Ortholog(s) have role in G2/M transition of mitotic cell cycle, regulation of cyclin-dependent protein serine/threonine kinase activity	0	1.38274	4.21095e-06	5.63884	6.61e-08	546	440	332	431	231	491	236	161	274	666	716	528	47.143	57.638	46.721	46.807	52.296	57.699	31.921	19.711	31.24	82.65	81.278	97.209
B9J08_002356	NA	NA	NA	NA	mRNA Protein of unknown function	0	1.41732	2.77082e-05	6.87309	7.64e-07	2347	1382	1167	1976	800	1569	300	434	277	1089	1170	687	202.645	181.035	164.226	214.595	181.113	184.38	40.577	53.135	31.582	135.143	132.814	126.483
B9J08_005080	NA	NA	NA	NA	mRNA Ortholog of Candida tenuis NRRL Y-1498 : CANTEDRAFT_113685, Debaryomyces hansenii CBS767 : DEHA2D03938g and Candida lusitaniae ATCC 42720 : CLUG_02430	0	1.49676	2.03e-07	8.80273	7.77e-10	4448	3030	2539	7265	3548	5421	1755	1418	1781	5365	6552	3742	384.05	396.916	357.301	788.986	803.234	637.044	237.378	173.605	203.061	665.789	743.758	688.935
B9J08_003772	CZF1	NA	NA	UME6	mRNA Has domain(s) with predicted DNA-binding transcription factor activity, RNA polymerase II-specific, zinc ion binding activity, role in regulation of transcription, DNA-templated and host cell nucleus, nucleus localization	0	1.52679	0.00116565	3.22538	7.76473e-05	158	126	118	175	77	177	25	23	17	68	78	61	13.642	16.505	16.606	19.005	17.432	20.8	3.381	2.816	1.938	8.439	8.854	11.231
B9J08_005018	CDC21	NA	CDC21	NA	mRNA Ortholog(s) have FMN binding, phosphatase inhibitor activity, phosphopantothenoylcysteine decarboxylase activity, thymidylate synthase activity and role in dTMP biosynthetic process, regulation of signal transduction	0	1.56897	7.49e-07	9.93995	5.28e-09	17373	8031	8907	19260	7893	16285	2810	2401	2726	8109	10877	7170	1500.02	1052.02	1253.44	2091.65	1786.9	1913.72	380.075	293.954	310.805	1006.32	1234.71	1320.06
B9J08_004839	PST3	NA	PST2	NA	mRNA Ortholog(s) have extracellular region, intracellular, mating-type region heterochromatin, membrane raft localization	0	1.5803	8.35e-07	7.98574	6.05e-09	1860	1461	1342	3019	1327	2184	1498	975	1139	3938	4951	3009	160.596	191.384	188.853	327.866	300.421	256.651	202.617	119.369	129.863	488.7	562.018	553.984
B9J08_000892	NA	NA	NA	NA	mRNA Protein of unknown function	0	1.59186	9.41e-07	4.14279	7.38e-09	100	63	53	78	19	68	170	148	219	602	680	502	8.634	8.253	7.458	8.471	4.301	7.991	22.994	18.12	24.969	74.707	77.191	92.423
B9J08_004840	YCP4	NA	YCP4	NA	mRNA Ortholog(s) have cytoplasm, membrane raft localization	0	1.67283	6.77e-07	5.11137	4.09e-09	298	233	162	337	164	296	149	168	160	557	652	471	25.73	30.522	22.797	36.599	37.128	34.784	20.153	20.568	18.242	69.123	74.013	86.715
B9J08_002643	RCT1	NA	YNL208W	NA	mRNA Ortholog of S. cerevisiae : YNL208W, C. albicans SC5314 : C3_05710W_A/RCT1, C. glabrata CBS138 : CAGL0K04719g, C. dubliniensis CD36 : Cd36_85650 and C. parapsilosis CDC317 : CPAR2_807040	0	1.71103	2.44602e-05	8.47787	6.45e-07	19609	8554	7624	6840	3746	5543	613	586	419	2399	2224	1279	1693.08	1120.53	1072.89	742.83	848.06	651.381	82.913	71.744	47.772	297.712	252.46	235.475
B9J08_000005	NA	NA	NA	NA	mRNA Protein of unknown function	0	1.8057	0.000152338	3.83662	6.25418e-06	586	429	407	157	84	178	25	16	35	89	125	78	50.597	56.197	57.275	17.05	19.017	20.918	3.381	1.959	3.991	11.045	14.19	14.36
B9J08_004787	NA	NA	CMR3	NA	mRNA Ortholog(s) have DNA binding activity	0	1.82497	0.000279112	6.20261	1.30878e-05	148	100	232	919	510	833	313	924	417	2219	2229	1391	12.779	13.1	32.648	99.804	115.459	97.889	42.336	113.125	47.544	275.375	253.027	256.095
B9J08_003251	XOG1	NA	EXG1	NA	mRNA Ortholog(s) have glucan endo-1,6-beta-glucosidase activity and role in cellular glucan metabolic process, fungal-type cell wall beta-glucan metabolic process, fungal-type cell wall disassembly involved in conjugation with cellular fusion	0	1.90746	7.21e-09	8.14838	1.16e-11	2942	2611	2093	3628	1602	3440	966	761	997	3681	4561	3046	254.019	342.029	294.538	394.004	362.678	404.249	130.659	93.169	113.673	456.807	517.747	560.796
B9J08_000618	NA	orf19.3007.2	NA	YLR326W	mRNA Protein of unknown function	0	2.10482	2.36039e-05	4.88179	6.13e-07	933	513	436	507	196	432	60	51	46	217	344	195	80.557	67.201	61.356	55.061	44.373	50.766	8.115	6.244	5.245	26.929	39.05	35.901
B9J08_004498	NA	ALS1	NA	SAG1	mRNA Putative cell-surface adhesin, similar to C. albicans Als3p	0	2.19531	4.24e-07	7.25176	1.71e-09	196	278	201	261	157	258	3218	2806	2394	16298	17925	9399	16.923	36.417	28.286	28.345	35.543	30.319	435.26	343.538	272.952	2022.56	2034.78	1730.44
B9J08_000389	NA	NA	NA	NA	mRNA Has domain(s) with predicted catalytic activity	0	2.27897	3.79e-09	7.24683	3.05e-12	682	617	502	1823	1004	1717	644	633	634	3962	4195	2332	58.885	80.824	70.644	197.98	227.296	201.772	87.106	77.498	72.286	491.679	476.2	429.342
B9J08_004109	NA	RBR3	NA	FLO1	mRNA Ortholog of Candida lusitaniae ATCC 42720 : CLUG_05599	0	2.31758	2.51879e-06	3.43028	3.24e-08	56	75	44	59	33	81	49	45	65	363	331	199	4.835	9.825	6.192	6.407	7.471	9.519	6.628	5.509	7.411	45.048	37.574	36.638
B9J08_000003	NA	ZRT1	NA	ZRT2	mRNA Has domain(s) with predicted metal ion transmembrane transporter activity, role in metal ion transport, transmembrane transport and membrane localization	0	2.47119	6.77e-07	8.05083	4e-09	1152	1019	883	5913	2135	5490	908	477	1318	4531	6364	4522	99.466	133.484	124.26	642.157	483.344	645.153	122.814	58.399	150.272	562.291	722.417	832.54
B9J08_000004	NA	ZRT1	NA	NA	mRNA Protein of unknown function	0	2.47646	6.65e-07	9.85539	3.61e-09	6179	3949	3463	23196	7559	11510	3427	1720	3624	16704	21389	13606	533.508	517.3	487.331	2519.11	1711.29	1352.59	463.529	210.579	413.191	2072.94	2428	2504.99
B9J08_002295	NA	NA	NA	NA	mRNA Protein of unknown function	0	2.49488	1.62424e-06	2.57511	1.7e-08	16	10	12	16	5	6	128	64	66	431	682	429	1.381	1.31	1.689	1.738	1.132	0.705	17.313	7.836	7.525	53.486	77.418	78.983
B9J08_002529	BRG1	NA	NA	GAT2	mRNA Has domain(s) with predicted DNA-binding transcription factor activity, sequence-specific DNA binding, zinc ion binding activity and role in regulation of transcription, DNA-templated	0	2.61514	6.88e-08	4.274	2.21e-10	88	82	84	254	117	255	73	53	73	473	493	383	7.598	10.742	11.821	27.585	26.488	29.966	9.874	6.489	8.323	58.699	55.963	70.514
B9J08_004135	WOR4	NA	NA	NA	mRNA Has domain(s) with predicted nucleic acid binding activity	0	2.6827	0.000224014	1.8685	9.82795e-06	15	8	20	42	9	51	15	8	27	121	161	62	1.295	1.048	2.815	4.561	2.038	5.993	2.029	0.979	3.078	15.016	18.276	11.415
B9J08_002992	NA	PRA1	NA	ZPS1	mRNA Has domain(s) with predicted metallopeptidase activity	0	2.68934	5.18e-07	8.20924	2.52e-09	1129	915	746	25150	9344	20523	621	267	732	2943	4752	3161	97.48	119.861	104.981	2731.31	2115.39	2411.74	83.995	32.689	83.459	365.222	539.429	581.968
B9J08_005421	NA	SAP3	NA	YPS3	mRNA Has domain(s) with predicted aspartic-type endopeptidase activity and role in proteolysis	0	2.93734	4.96e-09	6.62037	5.99e-12	414	309	271	427	170	419	689	723	486	6049	6517	3584	35.746	40.478	38.137	46.373	38.486	49.238	93.193	88.517	55.411	750.672	739.785	659.846
B9J08_003343	NA	NA	NA	NA	mRNA Ortholog of C. albicans SC5314 : C2_00860C_A, C. dubliniensis CD36 : Cd36_15800, Debaryomyces hansenii CBS767 : DEHA2F00660g and Pichia stipitis Pignal : PICST_29338	0	2.9408	1.85529e-05	3.52944	4.45e-07	50	51	56	703	424	729	11	12	24	114	176	109	4.317	6.681	7.881	76.346	95.99	85.668	1.488	1.469	2.736	14.147	19.979	20.068
B9J08_000918	PHR1	NA	NA	GAS1	mRNA Ortholog(s) have extracellular region localization	0	3.10348	7.49e-07	5.7404	5.07e-09	309	201	245	485	180	283	189	340	140	2666	2254	1167	26.68	26.33	34.478	52.671	40.75	33.257	25.564	41.626	15.962	330.847	255.865	214.855
B9J08_002465	NA	SIT1	NA	ARN1	mRNA Has domain(s) with predicted transmembrane transporter activity, role in transmembrane transport and integral component of membrane localization	0	3.10411	3.40608e-06	2.43005	5.07e-08	5	19	13	13	7	18	66	64	26	417	566	365	0.432	2.489	1.829	1.412	1.585	2.115	8.927	7.836	2.964	51.749	64.25	67.2
B9J08_002951	FRP6	NA	NA	ATO2	mRNA Has domain(s) with predicted integral component of membrane localization	0	3.19458	0.00296935	-0.0930914	0.000242615	1	5	0	0	0	4	8	9	23	80	165	174	0.086	0.655	0	0	0	0.47	1.082	1.102	2.622	9.928	18.73	32.035
B9J08_002825	NA	NA	NA	NA	mRNA Ortholog of Candida tenuis NRRL Y-1498 : CANTEDRAFT_115096	0	3.33072	3.15e-09	10.5282	6.34e-13	9289	6021	6653	16225	7638	11767	4891	4644	3564	47190	57879	39785	802.032	788.722	936.245	1762.05	1729.17	1382.79	661.547	568.564	406.35	5856.21	6570.2	7324.77
B9J08_000266	NA	NA	NA	NA	mRNA Protein of unknown function	0	3.35254	3.51e-09	5.5803	2.12e-12	162	207	137	432	220	309	170	198	172	2099	2505	1520	13.987	27.116	19.279	46.916	49.806	36.312	22.994	24.241	19.611	260.483	284.358	279.846
B9J08_004110	NA	IFF3	NA	NA	mRNA Protein of unknown function	0	4.58951	6.88e-08	3.61148	1.96e-10	14	23	30	24	19	44	102	38	86	1476	2284	1940	1.209	3.013	4.222	2.606	4.301	5.171	13.796	4.652	9.805	183.169	259.271	357.171

## Sheet: Fig2C_S vs W_heatmap_regulators
cut-off of FDR < 0.01 and log2FC ± 0.585
gene	C. albicans ortholog	C. albicans best hit	S. cerevisiae ortholog	S. cerevisiae best hit	product	wrinkled lactate	smooth lactate	wrinkled glucose	smooth glucose	FDR	AveExpr	P value	S1_Glu	S2_Glu	S3_Glu	W1_Glu	W2_Glu	W3_Glu	S1_Lac	S2_Lac	S3_Lac	W1_Lac	W2_Lac	W3_Lac	S1_Glu CPM	S2_Glu CPM	S3_Glu CPM	W1_Glu CPM	W2_Glu CPM	W3_Glu CPM	S1_Lac CPM	S2_Lac CPM	S3_Lac CPM	W1_Lac CPM	W2_Lac CPM	W3_Lac CPM
B9J08_000592	UME6	NA	NA	UME6	mRNA Has domain(s) with predicted DNA-binding transcription factor activity, RNA polymerase II-specific, zinc ion binding activity, role in regulation of transcription, DNA-templated and host cell nucleus, nucleus localization	3.35311	2.29452	1.32073	0	3.66415e-12	7.38705	1.76977e-14	568	526	420	1456	595	1303	1491	1445	1651	3984	4053	2625	49.042	68.903	59.105	158.123	134.703	153.121	201.67	176.911	188.239	494.409	460.081	483.286
B9J08_002529	BRG1	NA	NA	GAT2	mRNA Has domain(s) with predicted DNA-binding transcription factor activity, sequence-specific DNA binding, zinc ion binding activity and role in regulation of transcription, DNA-templated	2.9688	0.353661	1.50894	0	1.45e-09	4.274	5.44e-11	88	82	84	254	117	255	73	53	73	473	493	383	7.598	10.742	11.821	27.585	26.488	29.966	9.874	6.489	8.323	58.699	55.963	70.514
B9J08_004787	NA	NA	IRF1/CMR3	NA	mRNA Ortholog(s) have DNA binding activity	4.24696	2.42199	2.56396	0	3.81e-07	6.20261	4.5e-08	148	100	232	919	510	833	313	924	417	2219	2229	1391	12.779	13.1	32.648	99.804	115.459	97.889	42.336	113.125	47.544	275.375	253.027	256.095
B9J08_003950	TEC1	NA	TEC1	NA	mRNA Ortholog(s) have DNA-binding transcription activator activity, RNA polymerase II-specific, RNA polymerase II cis-regulatory region sequence-specific DNA binding activity	0.837009	-0.405171	0.124056	0	5.56e-07	6.97789	7.05e-08	1443	1060	975	1289	606	1446	497	469	664	1387	1748	1123	124.592	138.855	137.207	139.987	137.193	169.925	67.223	57.42	75.706	172.125	198.426	206.754
B9J08_001679	CPH2	NA	HMS1	NA	mRNA Ortholog(s) have role in pseudohyphal growth	0.106819	0.920749	-0.338112	0	2.01e-07	9.10233	2.09e-08	6510	4169	4243	4812	1959	3562	5348	5306	6681	3899	4513	2613	562.088	546.119	597.097	522.588	443.5	418.585	723.36	649.613	761.735	483.86	512.298	481.077
B9J08_004027	WOR1	NA	MIT1	NA	mRNA Ortholog of S. cerevisiae : MIT1, C. albicans SC5314 : C1_10150W_A/WOR1, C. glabrata CBS138 : CAGL0L02453g, C. dubliniensis CD36 : Cd36_09540 and C. parapsilosis CDC317 : CPAR2_805000	4.04954	4.50862	0.650554	0	2.79e-12	6.60592	1.12e-14	234	164	205	339	136	356	2054	3265	3289	2425	2593	1781	20.204	21.483	28.849	36.816	30.789	41.835	277.82	399.733	374.996	300.939	294.347	327.898
B9J08_004135	WOR4	NA	NA	NA	mRNA Has domain(s) with predicted nucleic acid binding activity	3.56329	0.880597	1.38894	0	1.16819e-05	1.8685	2.36035e-06	15	8	20	42	9	51	15	8	27	121	161	62	1.295	1.048	2.815	4.561	2.038	5.993	2.029	0.979	3.078	15.016	18.276	11.415
B9J08_004946	HGC1	NA	CLN2	NA	mRNA Ortholog(s) have cyclin-dependent protein serine/threonine kinase regulator activity	5.96117	4.73329	2.01083	0	5.18e-13	6.82005	3.13e-16	123	120	139	479	261	584	1930	1803	2481	5296	6180	4468	10.62	15.719	19.561	52.02	59.088	68.628	261.048	220.741	282.872	657.226	701.53	822.599
B9J08_004089	RFG1	NA	ROX1	NA	mRNA Ortholog(s) have DNA binding, bending, DNA-binding transcription repressor activity, RNA polymerase II-specific, cis-regulatory region sequence-specific DNA binding, sequence-specific DNA binding, transcription corepressor activity	2.65072	1.43929	1.1426	0	7.17e-10	5.52728	2.07e-11	225	172	168	451	195	449	311	252	391	758	1009	670	19.427	22.531	23.642	48.979	44.146	52.764	42.065	30.852	44.58	94.067	114.538	123.353
B9J08_000468	ACE2	NA	ACE2	NA	mRNA Ortholog(s) have DNA-binding transcription factor activity, RNA polymerase II-specific, cis-regulatory region sequence-specific DNA binding activity	1.54786	1.25833	0.507375	0	8.22e-07	5.95227	1.09e-07	421	410	244	539	237	544	609	419	548	763	768	580	36.35	53.708	34.337	58.536	53.655	63.928	82.372	51.298	62.48	94.687	87.18	106.783

## Sheet: Fig2C_S vs W_heatmap_adhesins
cut-off of FDR < 0.01 and log2FC ± 0.585
gene	C. albicans ortholog	C. albicans best hit	S. cerevisiae ortholog	S. cerevisiae best hit	product	wrinkled lactate	smooth lactate	wrinkled glucose	smooth glucose	FDR	AveExpr	P value	S1_Glu	S2_Glu	S3_Glu	W1_Glu	W2_Glu	W3_Glu	S1_Lac	S2_Lac	S3_Lac	W1_Lac	W2_Lac	W3_Lac	S1_Glu CPM	S2_Glu CPM	S3_Glu CPM	W1_Glu CPM	W2_Glu CPM	W3_Glu CPM	S1_Lac CPM	S2_Lac CPM	S3_Lac CPM	W1_Lac CPM	W2_Lac CPM	W3_Lac CPM
B9J08_001458	NA	SCF1/RBT1	NA	NA	mRNA Ortholog of Candida lusitaniae ATCC 42720 : CLUG_05295	6.95629	6.00961	0.810677	0	8.45e-13	9.97374	1.71e-15	673	1241	952	1758	957	1476	43664	29701	38812	85445	96363	57816	58.108	162.565	133.97	190.92	216.656	173.451	5905.91	3636.29	4425.16	10603.6	10938.8	10644.4
B9J08_004498	NA	ALS1	NA	SAG1	mRNA Putative cell-surface adhesin, similar to C. albicans Als3p	6.5635	4.36819	0.24909	0	7.34e-13	7.25176	1.27e-15	196	278	201	261	157	258	3218	2806	2394	16298	17925	9399	16.923	36.417	28.286	28.345	35.543	30.319	435.26	343.538	272.952	2022.56	2034.78	1730.44
B9J08_004100	NA	HYR3	NA	NA	mRNA Protein of unknown function	5.95747	5.82763	1.70373	0	8e-12	8.79153	4.47e-14	339	506	475	1751	788	1133	18880	9578	18805	17045	21854	15691	29.27	66.284	66.844	190.16	178.396	133.144	2553.67	1172.63	2144.05	2115.26	2480.78	2888.85
B9J08_004098	NA	RBR3	NA	NA	mRNA Protein of unknown function	5.987	5.95907	0.214159	0	1.08e-12	7.204	2.82e-15	187	174	179	247	128	171	7108	4472	10222	6501	9643	7180	16.146	22.793	25.19	26.824	28.978	20.095	961.414	547.506	1165.46	806.765	1094.64	1321.9
B9J08_004109	NA	RBR3	NA	FLO1	mRNA Ortholog of Candida lusitaniae ATCC 42720 : CLUG_05599	2.9203	0.60272	0.213159	0	2.91e-08	3.43028	2.03e-09	56	75	44	59	33	81	49	45	65	363	331	199	4.835	9.825	6.192	6.407	7.471	9.519	6.628	5.509	7.411	45.048	37.574	36.638
B9J08_004110	NA	IFF3	NA	NA	mRNA Protein of unknown function	7.05764	2.46813	0.652842	0	2.4e-09	3.61148	9.83e-11	14	23	30	24	19	44	102	38	86	1476	2284	1940	1.209	3.013	4.222	2.606	4.301	5.171	13.796	4.652	9.805	183.169	259.271	357.171
B9J08_001531	NA	IFF4	NA	FLO1	mRNA Protein of unknown function	-0.419451	0.859472	-0.0583258	0	0.000474611	4.54448	0.000155306	235	219	206	235	111	204	277	168	309	150	108	85	20.29	28.688	28.989	25.521	25.129	23.973	37.466	20.568	35.231	18.615	12.26	15.649
B9J08_004892	NA	HYR3	NA	FLO5	mRNA Protein of unknown function	-3.49337	-2.62137	-1.01963	0	7.54e-09	6.06853	3.99e-10	2327	2750	1923	1495	536	1069	294	220	202	122	210	103	200.918	360.237	270.615	162.358	121.345	125.623	39.766	26.935	23.031	15.14	23.838	18.963
B9J08_001155	NA	IFF6	NA	NA	mRNA Protein of unknown function	5.07702	5.91365	-0.274706	0	1.02e-10	7.0195	1.54e-12	153	279	211	174	91	169	9652	4014	10909	3557	6132	4460	13.21	36.548	29.693	18.897	20.602	19.86	1305.51	491.433	1243.79	441.419	696.081	821.126
B9J08_004451	NA	IFF4	NA	YIL169C	mRNA Protein of unknown function	3.07222	2.11902	2.4016	0	1.93e-09	11.3499	7.6e-11	6151	7790	7047	39431	17476	43276	21497	15031	21021	44370	45080	32431	531.091	1020.45	991.691	4282.24	3956.41	5085.54	2907.64	1840.24	2396.71	5506.25	5117.31	5970.84
B9J08_005559	NA	NA	NA	NA	mRNA Protein of unknown function	2.72145	4.74563	0.452826	0	0.000250806	5.29327	7.49037e-05	144	118	55	190	52	131	4131	369	3082	171	814	714	12.433	15.457	7.74	20.634	11.772	15.394	558.751	45.177	351.395	21.221	92.402	131.454
B9J08_002244	NA	NA	NA	NA	mRNA Protein of unknown function	-0.200109	2.01458	-1.9526	0	2.78e-09	9.19341	1.19e-10	7599	4738	5961	2574	671	1246	11742	19856	14711	4078	3721	2989	656.114	620.655	838.863	279.539	151.908	146.423	1588.2	2430.97	1677.28	506.074	422.393	550.301
B9J08_001551	NA	NA	NA	NA	mRNA Protein of unknown function	-1.5948	-1.66787	-0.272826	0	1.39571e-05	3.80174	2.87625e-06	354	233	196	227	102	231	63	66	32	61	65	49	30.565	30.522	27.582	24.652	23.092	27.146	8.521	8.08	3.648	7.57	7.379	9.021
B9J08_005560	NA	NA	NA	NA	mRNA Protein of unknown function	-4.7441	-4.32071	-0.848516	0	2.37e-08	7.97374	1.57e-09	21071	11672	10827	14526	3584	5179	814	410	250	234	474	422	1819.32	1528.98	1523.63	1577.54	811.385	608.606	110.1	50.196	28.504	29.039	53.807	77.694

## Sheet: Fig3F_heatmap_regulators
cut-off of FDR < 0.01
Name	albicans_orthologue	cerevisiae_orthologue	470140_Smooth_Glucose	470140_Smooth_Lactate	470140_Smooth_Casamino_acid	470140_Wrinkled_Glucose	470140_Wrinkled_Lactate	470140_Wrinkled_Casamino_acid	470121_Glucose	470121_Lactate	470121_Casamino_acid	B8441_Glucose	B8441_Lactate	B8441_Casamino_acid	B11205_Glucose	B11205_Lactate	B11205_Casamino_acid	FDR	AveExpr	P value	470140_Smooth_Glucose_R1	470140_Smooth_Glucose_R2	470140_Smooth_Glucose_R3	470140_Wrinkled_Glucose_R1	470140_Wrinkled_Glucose_R2	470140_Wrinkled_Glucose_R3	470121_Glucose_R1	470121_Glucose_R2	470121_Glucose_R3	B8441_Glucose_R1	B8441_Glucose_R2	B8441_Glucose_R3	B11205_Glucose_R1	B11205_Glucose_R2	B11205_Glucose_R3	470140_Smooth_Lactate_R1	470140_Smooth_Lactate_R2	470140_Smooth_Lactate_R3	470140_Wrinkled_Lactate_R1	470140_Wrinkled_Lactate_R2	470140_Wrinkled_Lactate_R3	470121_Lactate_R1	470121_Lactate_R2	470121_Lactate_R3	B8441_Lactate_R1	B8441_Lactate_R2	B8441_Lactate_R3	B11205_Lactate_R1	B11205_Lactate_R2
B9J08_000592	UME6	UME6	0	1.65831	1.45914	1.39688	2.68684	2.84116	0.18157	0.759512	-0.0123053	-1.91496	-2.18595	-0.903933	1.63784	2.14719	1.57436	2.63e-21	6.09022	3.28e-23	30	14	49	65	78	57	24	64	47	8	11	21	206	164	228	21	82	42	88	135	279	20	25	47	6	3	7	53	101
B9J08_002529	BRG1	GAT2	0	-0.413869	0.543579	1.36082	3.29981	3.25291	-0.348248	-1.05308	-1.10603	-0.118594	-0.841595	-0.253783	1.55328	1.91682	1.75372	7.52e-15	4.19872	4.35e-16	13	5	7	16	18	23	9	6	11	10	15	14	55	53	58	0	3	11	42	100	83	0	2	7	6	1	5	16	23
B9J08_004787	NA	IRF1/CMR3	0	-1.64134	-1.83844	1.38406	1.5295	1.5544	0.682359	-1.22203	-1.40481	0.287511	-2.40495	-1.52267	0.561641	0.219827	0.22096	2.81e-15	5.25322	1.51e-16	32	29	34	53	68	100	52	59	91	84	46	64	114	76	121	7	6	3	49	67	125	3	5	20	4	4	8	7	33
B9J08_003950	TEC1	TEC1	0	-1.07378	-1.62625	-0.0822762	0.947688	0.27173	-0.522024	-1.62121	-2.39143	-1.27065	-1.73691	-1.5541	-1.02479	-1.65898	-1.70309	7.46e-17	6.61873	2.63e-18	169	100	152	94	127	126	85	143	164	96	70	128	128	112	234	16	45	41	117	232	369	26	21	40	60	12	44	16	48
B9J08_001679	CPH2	HMS1	0	0.458126	0.111518	-0.398594	-0.368625	-0.592818	-0.214028	-0.176996	-0.266621	-0.396562	0.202471	0.197033	-0.0587477	0.707679	0.574985	4.07e-11	10.1129	4.6e-12	1002	669	702	451	498	634	781	873	1037	1046	887	1053	2002	1768	1333	360	772	527	275	610	717	261	409	657	1289	347	908	651	927
B9J08_004027	WOR1	MIT1	0	-0.33003	-0.318864	0.12529	1.1999	0.995888	-0.367021	0.0646709	-0.102497	0.0844852	0.430325	0.927783	-0.0865622	1.62937	1.31782	6.81e-09	5.70535	1.13e-09	28	30	29	21	33	27	29	26	32	54	36	62	51	52	76	3	16	17	34	55	83	16	13	28	27	24	65	30	77
B9J08_004135	WOR4	NA	0	-0.572982	0.357484	-1.39214	1.92994	2.27948	1.48465	-0.478495	1.32114	1.17823	-0.37819	0.157903	1.79915	1.5561	2.1071	3.78313e-06	3.42378	1.01707e-06	5	2	5	4	1	0	10	15	23	15	15	18	38	30	32	3	2	0	10	13	20	0	7	1	11	6	0	5	9
B9J08_004946	HGC1	CLN2	0	2.89052	2.21695	2.0096	5.20567	5.0272	0.089589	1.96319	0.906452	0.477914	0.0712873	-0.0256126	1.31806	3.60007	3.32114	1.42e-18	5.81493	3.51e-20	16	12	5	29	51	31	9	17	17	21	28	23	47	64	62	18	56	45	152	367	513	18	25	32	16	7	7	60	100
B9J08_004089	RFG1	ROX1	0	0.478939	0.501401	0.610882	1.88784	1.53591	-0.146992	0.366967	0.305555	-0.70547	0.570081	0.42866	0.229494	0.679757	0.832687	1.44e-12	6.89564	1.25e-13	74	48	54	61	84	91	51	77	82	64	54	60	145	192	128	29	65	34	107	192	267	19	55	71	96	40	101	45	74
B9J08_000468	ACE2	ACE2	0	0.999504	0.929216	0.316626	1.29114	1.3402	0.468786	1.02021	1.01728	0.331036	0.993342	0.996244	0.625831	1.49149	1.56674	5.51e-07	6.23315	1.26e-07	30	32	25	31	30	31	40	55	60	64	54	59	110	99	84	10	50	30	27	47	118	30	35	43	71	29	54	33	61
[truncated: 61 more columns]

## Sheet: Fig3F_heatmap_adhesins
cut-off of FDR < 0.01
Name	albicans_orthologue	cerevisiae_orthologue	470140_Smooth_Glucose	470140_Smooth_Lactate	470140_Smooth_Casamino_acid	470140_Wrinkled_Glucose	470140_Wrinkled_Lactate	470140_Wrinkled_Casamino_acid	470121_Glucose	470121_Lactate	470121_Casamino_acid	B8441_Glucose	B8441_Lactate	B8441_Casamino_acid	B11205_Glucose	B11205_Lactate	B11205_Casamino_acid	FDR	AveExpr	P value	470140_Smooth_Glucose_R1	470140_Smooth_Glucose_R2	470140_Smooth_Glucose_R3	470140_Wrinkled_Glucose_R1	470140_Wrinkled_Glucose_R2	470140_Wrinkled_Glucose_R3	470121_Glucose_R1	470121_Glucose_R2	470121_Glucose_R3	B8441_Glucose_R1	B8441_Glucose_R2	B8441_Glucose_R3	B11205_Glucose_R1	B11205_Glucose_R2	B11205_Glucose_R3	470140_Smooth_Lactate_R1	470140_Smooth_Lactate_R2	470140_Smooth_Lactate_R3	470140_Wrinkled_Lactate_R1	470140_Wrinkled_Lactate_R2	470140_Wrinkled_Lactate_R3	470121_Lactate_R1	470121_Lactate_R2	470121_Lactate_R3	B8441_Lactate_R1	B8441_Lactate_R2	B8441_Lactate_R3	B11205_Lactate_R1	B11205_Lactate_R2
B9J08_001458	RBT1	NA	0	1.90628	2.17019	1.0061	3.45355	3.5133	-1.3909	0.692893	0.000663492	-1.526	-1.35337	-0.371009	1.39529	3.03996	3.01404	7.59e-27	10.8236	1.05e-29	775	617	497	899	1198	1218	190	447	350	283	269	607	3586	4209	3204	592	1501	1601	2601	6071	10124	372	532	1066	237	128	292	2875	3823
B9J08_002582	ALS4	SAG1	0	-1.35839	-0.330324	-0.793992	-0.969284	-2.30339	-0.993914	-1.68707	-0.119955	1.47583	0.0362851	0.595549	-0.767415	-1.20191	-0.904863	0.00100852	1.82163	0.000448695	3	2	6	3	1	1	3	3	1	26	18	11	4	6	4	0	1	0	1	2	1	0	1	0	8	0	4	2	0
B9J08_004498	ALS1	SAG1	0	3.57383	2.69722	0.397223	5.8536	6.17321	-0.00282246	1.31995	0.571202	0.438807	0.5291	0.795204	0.157685	1.03394	1.18167	5.42e-23	5.77362	4.07e-25	13	18	8	12	17	12	7	23	20	31	19	32	25	21	46	31	98	100	235	636	1126	14	12	33	18	16	16	12	17
B9J08_004112	ALS4	SAG1	0	0.276909	1.0215	1.46927	0.425698	0.981781	1.44594	0.533699	1.0529	0.522977	0.0678834	0.539769	2.757	0.0514802	2.22452	0.00437647	2.24586	0.00222763	3	0	2	3	2	9	9	2	11	2	7	4	22	29	29	0	1	1	1	1	3	2	0	3	1	0	4	0	2
B9J08_004100	HYR3	NA	0	3.47821	3.22699	0.610308	3.16019	3.10095	-1.59365	0.374573	-0.33085	-1.73278	-0.390745	-0.428647	2.95154	3.76077	3.4687	6.01e-32	10.2112	2.38e-35	327	380	307	351	464	550	81	221	166	139	128	262	6617	5275	5436	1090	2508	2181	1422	2593	3887	163	250	419	220	130	356	1940	3677
B9J08_004109	RBR3	FLO1	0	0.0669966	0.266174	0.661703	1.33552	2.48168	0.515079	0.415018	0.982542	-0.0263446	-0.0735102	0.880156	3.83634	4.01985	4.36469	8.31e-26	6.82672	2.47e-28	34	33	29	28	46	61	49	70	60	43	46	68	1177	976	873	10	23	17	49	68	92	25	25	30	32	17	33	235	338
B9J08_004098	RBR3	NA	0	2.21837	2.33591	-0.0237557	2.06715	2.14304	-0.375853	1.68426	1.80135	-0.609021	2.75025	2.43431	2.33363	3.38542	3.45775	8.22e-26	11.7148	2.28e-28	924	647	615	464	765	674	518	902	831	749	577	1124	8955	7900	7463	1103	2280	1765	1423	2911	3607	904	1463	2009	5015	2194	6086	3697	5512
B9J08_004110	IFF3	NA	0	-0.711443	0.030838	-0.0526508	6.25161	4.93919	0.244246	0.938673	0.350716	0.126488	-0.711155	1.11309	0.0410881	1.19233	1.53136	4.05e-19	5.24981	9.22e-21	19	12	8	9	15	8	16	32	15	14	23	38	22	21	48	5	8	1	520	747	1300	18	14	16	4	3	20	15	24
B9J08_001531	IFF4	FLO1	0	-0.310318	-0.224467	-0.835026	-1.72124	-1.23201	-0.770255	-0.628399	-1.00389	-0.217855	0.366363	-0.221161	-0.377202	-1.13408	-1.00156	0.000740619	5.19693	0.000319103	46	34	40	11	24	25	33	27	33	55	56	60	73	61	70	19	30	8	3	13	16	7	19	22	119	12	35	6	14
B9J08_004892	HYR3	FLO5	0	-1.62799	-1.24028	0.011782	-1.78885	-0.461025	-1.0924	-1.56044	-1.24974	1.39253	-1.76039	-0.898652	2.24578	-1.84822	-1.02167	1.08e-19	5.75721	2.01e-21	68	54	65	51	61	52	28	41	46	258	257	301	570	503	951	11	8	14	14	14	20	6	17	16	30	5	16	5	22
B9J08_001155	IFF6	NA	0	4.45865	3.74863	0.4896	3.35304	3.0684	-1.33144	0.361238	-0.497699	-1.32838	3.39324	2.64316	0.461733	4.13609	3.14009	5.6e-32	9.40759	1.11e-35	172	138	121	122	188	231	49	105	77	74	78	144	438	483	392	1066	2280	1482	598	1176	2234	67	100	186	1764	629	1721	1058	2073
B9J08_004451	IFF4	YIL169C	0	1.03099	0.904234	1.59082	1.92593	2.05577	-0.825607	-0.280376	-0.912408	-3.05935	-3.16161	-2.1724	1.09457	1.03996	0.790538	1.12e-27	9.74582	1.1e-30	669	545	597	1364	1874	1586	323	568	487	86	103	197	2362	2380	4098	266	895	852	983	1871	3391	191	316	431	79	43	63	538	1007
B9J08_000675	RBR3	FLO9	0	-2.15572	-0.624042	0.679103	-0.191331	-0.188501	-1.63694	-1.07023	-0.104185	-0.609086	1.52007	1.79335	-1.15407	0.713326	0.448126	4.68e-07	3.06635	1.06e-07	8	6	5	7	9	11	0	6	5	3	9	12	8	6	5	0	1	0	1	9	6	2	2	1	27	3	25	10	7
B9J08_002244	NA	NA	0	-0.235672	-0.577923	-0.98265	-1.81809	-1.79651	-1.53422	-2.2529	-2.17134	1.31851	-0.904485	-0.848864	-0.723562	-0.367849	-0.907602	6.14e-20	7.83769	1.08e-21	365	201	374	126	116	172	127	126	168	1308	1163	1355	342	357	562	69	191	147	42	75	112	29	41	50	204	57	198	86	182
B9J08_001520	NA	NA	0	0.552727	0.945544	0.594693	0.450959	-0.198545	3.94994	5.52325	4.11677	5.0778	6.52375	6.61835	1.1431	5.36893	4.35768	6.41e-17	6.64805	2.21e-18	10	11	6	8	11	16	186	138	232	576	391	552	52	39	40	5	7	7	6	11	14	147	237	407	546	490	1312	96	356
B9J08_001551	NA	NA	0	-0.467963	-1.65664	-0.367478	-1.36874	-0.535952	0.170964	-1.79289	-0.714099	0.783417	0.187745	0.410021	-0.318681	-1.91659	-1.16625	5.06e-08	4.69673	9.62e-09	41	11	34	10	26	21	33	42	46	79	72	83	41	43	62	9	12	9	6	10	11	3	3	8	37	9	40	2	3
B9J08_005559	NA	NA	0	4.04335	3.50995	0.411036	2.37332	2.27291	0.257145	4.3375	4.04317	-1.28706	3.18743	2.36503	-0.97236	3.14989	2.22725	4.62e-21	12.4752	6.59e-23	1314	1129	656	1015	1237	1236	1191	2222	1441	518	522	1146	977	838	1688	5099	11910	8354	3389	5397	4451	7479	14257	16067	7216	5223	12080	6048	6180
B9J08_005560	NA	NA	0	-1.80285	-2.20691	0.672485	-3.32362	-2.68244	1.70647	1.62841	3.03205	-3.11025	-1.61652	-1.66878	0.463496	-1.3468	-1.256	1.42e-21	7.31733	1.63e-23	244	134	198	253	248	297	927	1104	546	41	36	32	957	359	557	15	51	21	9	17	23	263	490	349	57	35	80	48	42
B9J08_005561	NA	NA	0	2.25144	2.74524	1.33034	1.35879	2.14966	0.815854	4.03092	3.74358	-0.553179	3.05119	3.27272	-0.175354	1.98176	1.75351	2.31296e-05	2.53725	7.2706e-06	1	0	1	1	5	1	4	1	2	0	1	2	1	2	2	3	1	4	2	2	2	10	13	10	10	5	8	4	5
[truncated: 61 more columns]

## Sheet: Fig4_3 mutants data_Lactate
Name	albicans_orthologue	cerevisiae_orthologue	470140_Wrinkled_Lactate	dbrg1_Lactate	dirf1_Lactate	dume6_Lactate	FDR	AveExpr	P value	470140_Wrinkled_Glucose_R1	470140_Wrinkled_Glucose_R2	470140_Wrinkled_Glucose_R3	dbrg1_Glucose_R1	dbrg1_Glucose_R2	dbrg1_Glucose_R3	dirf1_Glucose_R1	dirf1_Glucose_R2	dirf1_Glucose_R3	dume6_Glucose_R1	dume6_Glucose_R2	dume6_Glucose_R3	470140_Wrinkled_Lactate_R1	470140_Wrinkled_Lactate_R2	470140_Wrinkled_Lactate_R3	dbrg1_Lactate_R1	dbrg1_Lactate_R2	dbrg1_Lactate_R3	dirf1_Lactate_R1	dirf1_Lactate_R2	dirf1_Lactate_R3	dume6_Lactate_R1	dume6_Lactate_R2	dume6_Lactate_R3	470140_Wrinkled_Glucose_R1 CPM	470140_Wrinkled_Glucose_R2 CPM	470140_Wrinkled_Glucose_R3 CPM	dbrg1_Glucose_R1 CPM	dbrg1_Glucose_R2 CPM	dbrg1_Glucose_R3 CPM	dirf1_Glucose_R1 CPM	dirf1_Glucose_R2 CPM	dirf1_Glucose_R3 CPM	dume6_Glucose_R1 CPM	dume6_Glucose_R2 CPM	dume6_Glucose_R3 CPM	470140_Wrinkled_Lactate_R1 CPM	470140_Wrinkled_Lactate_R2 CPM	470140_Wrinkled_Lactate_R3 CPM	dbrg1_Lactate_R1 CPM
B9J08_004110	IFF3	NA	0	0.91611	-5.07052	-4.80079	1.32367685484136e-12	6.86275	2.6404884397394e-16	85	295	41	51	124	91	43	52	51	91	75	62	4766	1208	2743	2985	3280	8062	90	63	54	61	112	68	36.922	41.127	21.319	44.391	31.679	25.168	53.962	45.273	24.688	48.533	30.467	33.664	2198.76	1584.79	1853.96	4072.19
B9J08_004946	HGC1	CLN2	0	0.322345	-1.54152	-3.75139	3.76259379164363e-10	6.67034	1.50113456678382e-13	161	505	120	93	202	213	36	55	77	52	63	43	1306	354	885	480	784	1591	165	225	322	22	62	62	69.934	70.404	62.398	80.948	51.606	58.909	45.177	47.885	37.274	27.733	25.592	23.348	602.515	464.416	598.161	654.824
B9J08_002529	BRG1	GAT2	0	-3.1362	-2.8445	-2.93377	2.18710323718634e-9	4.82094	1.74514521219736e-12	107	245	73	27	113	101	16	31	39	46	72	48	315	110	195	16	12	38	30	12	30	10	25	29	46.478	34.156	37.959	23.501	28.869	27.934	20.079	26.989	18.879	24.533	29.248	26.063	145.323	144.31	131.798	21.827
B9J08_004729	BEM2	BEM2	0	-0.0665887	-1.11717	-1.67621	2.18710323718634e-9	6.58855	1.48342312957738e-12	200	536	165	70	253	245	64	71	155	120	137	110	570	163	312	151	240	520	135	94	158	53	90	108	86.875	74.725	85.797	60.928	64.636	67.76	80.315	61.815	75.031	63.999	55.653	59.727	262.966	213.841	210.877	205.997
B9J08_003251	XOG1	EXG1	0	0.163294	-1.21637	-1.93626	2.8907208809379e-9	8.93469	2.88322449724506e-12	1125	3219	881	542	1475	1367	355	513	882	659	937	592	2480	622	1659	820	1189	2756	475	408	747	172	355	425	488.67	448.771	458.102	471.76	376.828	378.071	445.499	446.633	426.953	351.461	380.635	321.44	1144.13	816.008	1121.3	1118.66
B9J08_003568	GCY1	GCY1	0	2.09179	3.73979	3.74431	0.000458021	1.47564	1.22431e-05	4	20	8	3	8	6	1	4	10	7	8	8	0	0	1	1	1	7	9	5	11	1	13	15	1.737	2.788	4.16	2.611	2.044	1.659	1.255	3.483	4.841	3.733	3.25	4.344	0	0	0.676	1.364
B9J08_002149	YPS7	YPS7	0	-0.446162	-1.17207	-1.97361	2.35643057872381e-8	5.78782	3.29044764633286e-11	100	325	82	38	160	144	21	38	77	78	85	81	315	115	253	67	129	292	82	69	101	26	51	62	43.437	45.309	42.638	33.075	40.876	39.826	26.353	33.084	37.274	41.599	34.529	43.981	145.323	150.87	171	91.403
B9J08_000592	UME6	UME6	0	-0.115433	-1.22068	-5.47066	2.37057631920182e-8	6.07652	3.78308608689697e-11	263	812	216	123	471	449	54	106	165	13	16	9	681	189	507	174	306	717	108	155	225	7	6	10	114.24	113.203	112.316	107.06	120.33	124.18	67.766	92.287	79.872	6.933	6.5	4.887	314.175	247.951	342.675	237.374
B9J08_000892	NA	NA	0	0.29341	-1.96958	-1.85327	2.38860924776293e-8	5.98613	4.28834694391908e-11	57	149	43	41	75	56	32	27	45	36	50	29	829	194	597	272	431	1130	106	97	114	72	107	154	24.759	20.773	22.359	35.687	19.161	15.488	40.158	23.507	21.783	19.2	20.311	15.746	382.454	254.511	403.505	371.067
B9J08_004986	NA	YNL234W	0	1.05006	-1.06552	-0.840343	2.80283200860199e-8	5.79228	5.59112708677835e-11	106	387	127	58	254	190	34	44	103	99	130	91	187	49	94	135	146	324	45	38	43	24	57	62	46.044	53.953	66.037	50.484	64.891	52.548	42.668	38.308	49.86	52.799	52.81	49.411	86.271	64.284	63.533	184.169
B9J08_000024	NA	NA	0	-0.122036	-1.22585	-1.69988	4.73657575679198e-8	5.96482	1.0393443711293e-10	102	410	111	51	204	181	32	60	100	72	109	109	330	110	187	95	144	288	89	49	83	36	48	68	44.306	57.159	57.718	44.391	52.117	50.059	40.158	52.238	48.407	38.399	44.279	59.184	152.244	144.31	126.391	129.601
B9J08_000594	NA	NA	0	0.344509	-1.23769	-1.69264	7.74369828057665e-8	7.00787	2.16261272547523e-10	208	714	203	108	388	346	88	98	200	145	212	148	772	179	442	275	409	841	128	118	220	42	146	149	90.35	99.541	105.556	94.004	99.125	95.693	110.434	85.322	96.815	77.332	86.12	80.36	356.158	234.832	298.742	375.16
B9J08_002560	RBR2	TIP1	0	-0.246345	-1.22554	-1.60032	7.74369828057665e-8	8.50279	2.14863439418894e-10	488	1911	501	287	958	874	167	265	494	483	462	422	2120	722	1572	723	737	2025	597	380	588	277	373	482	211.974	266.419	260.51	249.806	244.747	241.722	209.573	230.717	239.133	257.596	187.677	229.135	978.049	947.2	1062.49	986.329
B9J08_003950	TEC1	TEC1	0	0.674944	-1.838	-1.87537	7.74369828057665e-8	7.6806	1.86274397539684e-10	372	1772	504	210	1140	911	75	221	405	435	513	398	809	250	587	453	661	1211	93	121	168	55	127	181	161.587	247.04	262.07	182.785	291.244	251.955	94.12	192.409	196.05	231.996	208.395	216.103	373.227	327.978	396.746	617.99
B9J08_001550	orf19.867	AIM14	0	0.626242	-0.117785	3.73429	0.00200097	0.585597	8.90119e-05	3	6	2	5	3	6	5	1	1	1	3	1	1	1	0	2	0	2	0	0	2	9	11	15	1.303	0.836	1.04	4.352	0.766	1.659	6.275	0.871	0.484	0.533	1.219	0.543	0.461	1.312	0	2.728
B9J08_005114	SRR1	SKN7	0	0.142795	2.20446	2.46548	0.00052197	5.44816	1.57209e-05	150	207	57	83	122	107	58	53	53	75	102	54	53	28	17	23	25	45	189	74	105	111	150	137	65.156	28.859	29.639	72.244	31.168	29.593	72.786	46.143	25.656	39.999	41.435	29.321	24.451	36.733	11.49	31.377
B9J08_000266	NA	NA	0	0.397464	-2.49439	-3.47046	9.76557251158168e-8	5.42871	3.39529485089347e-10	65	225	61	21	89	86	10	43	70	36	70	49	451	141	307	117	348	793	28	62	51	9	19	37	28.234	31.368	31.719	18.279	22.737	23.785	12.549	37.437	33.885	19.2	28.436	26.606	208.066	184.979	207.497	159.613
B9J08_001936	NA	AMF1	0	0.21646	-1.56423	-2.2923	9.76557251158168e-8	6.44753	3.50648923216577e-10	129	363	110	62	191	188	71	72	117	87	121	85	746	154	426	192	399	757	90	90	168	29	102	74	56.034	50.607	57.198	53.965	48.796	51.995	89.1	62.685	56.637	46.399	49.154	46.153	344.163	202.034	287.928	261.93
B9J08_005063	NA	NA	0	0.228794	2.07698	2.43566	0.00819818	4.74456	0.000595279	85	89	25	63	49	29	82	25	37	39	68	22	29	12	24	16	17	38	80	63	87	58	79	158	36.922	12.408	12.999	54.836	12.518	8.021	102.904	21.766	17.911	20.8	27.623	11.945	13.379	15.743	16.221	21.827
B9J08_004787	NA	CMR3	0	0.259541	-4.71487	-1.39566	1.77475251896516e-7	6.09638	7.08060051452287e-10	426	1102	270	242	602	571	6	9	12	315	360	257	426	122	285	176	213	521	15	7	5	24	121	125	185.043	153.633	140.395	210.638	153.797	157.921	7.53	7.836	5.809	167.997	146.242	139.544	196.533	160.053	192.628	240.102
B9J08_002465	SIT1	ARN1	0	0.110364	-5.46625	-2.0134	2.02651072577929e-7	4.86213	8.48927293863256e-10	82	103	49	43	45	54	0	2	6	30	48	14	794	243	404	273	350	769	10	7	8	48	129	105	35.619	14.36	25.479	37.427	11.496	14.935	0	1.741	2.904	16	19.499	7.602	366.307	318.794	273.059	372.431
B9J08_003109	NA	NA	0	-0.251386	-1.17337	-3.55284	2.32301013828174e-7	5.60809	1.01947382888886e-9	113	258	74	47	129	107	16	38	50	21	45	30	517	116	400	118	193	473	90	101	171	12	24	28	49.084	35.969	38.478	40.909	32.957	29.593	20.079	33.084	24.204	11.2	18.28	16.289	238.515	152.182	270.355	160.978
B9J08_004893	orf19.3232	TNA1	0	0.0677484	2.06149	2.84512	5.42784e-05	4.93594	8.33719244349087e-7	102	242	50	75	118	121	19	40	60	75	79	29	20	16	18	13	14	24	100	36	57	69	113	120	44.306	33.738	25.999	65.28	30.146	33.465	23.844	34.825	29.044	39.999	32.092	15.746	9.227	20.991	12.166	17.735
B9J08_004135	WOR4	NA	0	0.362279	-2.73879	-3.55605	3.77575356320784e-7	2.77125	1.80766178968658e-9	17	35	9	8	18	17	2	4	7	11	12	7	65	17	44	24	30	102	8	3	4	2	1	5	7.384	4.879	4.68	6.963	4.599	4.702	2.51	3.483	3.389	5.867	4.875	3.801	29.987	22.302	29.739	32.741
B9J08_002295	NA	NA	0	-0.915567	-4.02143	-4.99774	4.62742359658445e-7	3.72646	2.40002021765801e-9	12	45	10	10	20	10	3	4	6	14	9	14	394	138	386	41	145	322	13	16	17	2	8	13	5.212	6.274	5.2	8.704	5.11	2.766	3.765	3.483	2.904	7.467	3.656	7.602	181.77	181.044	260.893	55.933
B9J08_002376	NA	DML1	0	0.494654	-0.873539	-1.27372	4.62742359658445e-7	5.47984	2.39071698492223e-9	111	312	76	43	175	172	35	55	65	91	119	90	131	51	90	67	100	187	52	30	42	20	28	42	48.215	43.497	39.518	37.427	44.708	47.57	43.922	47.885	31.465	48.533	48.341	48.868	60.436	66.907	60.83	91.403
B9J08_000389	NA	NA	0	-2.53005	-0.291222	-3.38902	5.95010432936132e-7	6.18247	3.2047240553113e-9	193	668	184	45	214	183	64	132	198	90	139	146	551	152	412	9	60	132	205	237	284	10	34	39	83.834	93.128	95.676	39.168	54.672	50.612	80.315	114.923	95.847	47.999	56.466	79.274	254.201	199.41	278.466	12.278
B9J08_005018	CDC21	CDC21	0	-0.581042	2.03605	1.44477	6.51773331864142e-7	11.2218	3.64046544827369e-9	4957	12220	3440	2463	5997	5777	1809	2472	4253	3222	4356	2999	4082	1907	2280	1524	1142	2276	13601	6508	9849	5384	6816	5598	2153.19	1703.63	1788.73	2143.81	1532.09	1597.74	2270.16	2152.2	2058.77	1718.37	1769.53	1628.38	1883.21	2501.81	1541.02	2079.07
B9J08_001511	LMO1	YLL007C	0	0.0820165	-1.34876	-1.05082	8.36054107613224e-7	5.13605	5.10250241448249e-9	57	200	51	25	112	68	18	28	58	47	59	48	172	56	120	50	94	206	42	27	43	19	51	66	24.759	27.883	26.519	21.76	28.613	18.807	22.589	24.378	28.076	25.066	23.967	26.063	79.351	73.467	81.107	68.211
B9J08_002660	HGT17	HXT8	0	-0.519641	-2.61109	-1.37929	8.36054107613224e-7	5.44926	5.17009322481746e-9	41	75	19	23	37	42	12	15	22	49	41	20	568	345	397	179	218	501	67	46	75	65	154	229	17.809	10.456	9.88	20.019	9.453	11.616	15.059	13.059	10.65	26.133	16.655	10.859	262.043	452.609	268.327	244.195
B9J08_004410	CRH11	CRH1	0	-0.774711	-1.0324	-1.58108	8.36054107613224e-7	8.20741	4.94831823275579e-9	807	3446	824	339	1315	1331	283	435	878	583	850	662	1042	318	670	165	315	629	244	232	327	81	216	256	350.539	480.418	428.463	295.067	335.952	368.114	355.144	378.724	425.017	310.928	345.293	359.448	480.72	417.188	452.845	225.096
B9J08_004444	NA	NA	0	0.473502	0.38573	2.28842	0.000202399	4.36109	4.44124e-06	79	239	71	48	137	118	29	34	57	55	69	56	12	9	11	5	17	20	10	10	14	47	32	53	34.315	33.32	36.919	41.779	35	32.635	36.393	29.601	27.592	29.333	28.03	30.406	5.536	11.807	7.435	6.821
B9J08_002055	NA	NA	0	0.204571	-1.89009	-2.46211	1.20289e-06	8.12949	8.12551573707427e-9	1392	6545	1849	627	3397	2995	263	825	1567	1300	1710	1717	499	140	435	163	317	677	69	65	97	39	61	50	604.648	912.459	961.442	545.744	867.855	828.326	330.046	718.269	758.544	693.322	694.649	932.285	230.211	183.667	294.011	222.367
B9J08_002176	NA	YBR138C	0	-0.0695768	-0.551097	-1.52816	1.20289e-06	5.95779	8.15841837580777e-9	116	332	103	47	206	190	41	59	76	75	105	83	275	87	189	104	120	250	110	73	127	35	56	59	50.387	46.285	53.558	40.909	52.628	52.548	51.452	51.367	36.79	39.999	42.654	45.067	126.87	114.136	127.743	141.879
B9J08_000268	GCF1	NA	0	0.0310739	-0.691672	-1.10991	1.33419e-06	8.84958	1.02295099124705e-8	1014	3349	972	477	1906	1638	336	495	1036	787	980	863	1632	464	977	431	834	1637	459	394	690	190	451	489	440.455	466.895	505.42	415.183	486.939	453.021	421.656	430.961	501.501	419.726	398.103	468.586	752.913	608.727	660.342	587.978
B9J08_004825	NA	PIC2	0	0.149706	1.93287	2.08786	2.46634036887476e-7	7.37984	1.13157447604467e-9	338	1082	255	185	504	503	132	197	354	275	402	296	227	82	101	103	92	214	640	250	453	393	429	486	146.818	150.845	132.595	161.025	128.76	139.115	165.65	171.514	171.362	146.664	163.303	160.72	104.725	107.577	68.265	140.514
B9J08_003359	CDC3	CDC3	0	0.0179587	-0.833165	-1.29332	1.33419e-06	8.26767	9.92371752581396e-9	704	2639	717	332	1513	1223	231	360	772	613	727	612	1136	285	608	287	511	1042	269	219	420	103	256	282	305.799	367.911	372.825	288.975	386.536	338.245	289.888	313.426	373.705	326.928	295.327	332.3	524.087	373.895	410.94	391.53
B9J08_000030	NA	NA	0	0.148337	1.90023	2.17378	0.000240964	5.595	5.47974e-06	130	389	117	72	184	177	54	59	133	79	165	108	37	24	26	21	24	43	142	55	83	142	88	98	56.469	54.232	60.838	62.669	47.008	48.953	67.766	51.367	64.382	42.133	67.028	58.641	17.07	31.486	17.573	28.649
B9J08_004498	ALS1	SAG1	0	-0.805364	-1.74024	-6.00823	1.33419e-06	6.27734	1.03796908205871e-8	62	171	30	34	82	115	21	26	24	34	47	24	2250	999	2498	228	1180	2861	288	502	740	14	27	30	26.931	23.84	15.599	29.594	20.949	31.806	26.353	22.636	11.618	18.133	19.093	13.031	1038.02	1310.6	1688.37	311.042
B9J08_003550	YWP1	FLO5	0	-0.0285565	1.69705	1.78323	7.7929482790033e-8	11.3641	2.33182174715838e-10	7443	28062	7888	3089	14309	12895	2643	4364	9127	7165	9760	8668	2035	1067	1379	984	1036	2066	5788	3538	3533	2750	4505	5651	3233.04	3912.21	4101.6	2688.68	3655.62	3566.37	3316.77	3799.43	4418.14	3821.27	3964.78	4706.49	938.835	1399.81	932.049	1342.39
B9J08_002118	NA	NA	0	0.106051	1.6205	1.7881	1.21094e-05	8.56197	1.35273840403148e-7	960	2091	490	478	1199	1125	345	340	565	804	850	456	503	208	350	225	282	539	1196	631	994	903	957	1005	416.998	291.513	254.79	416.054	306.317	311.141	432.95	296.014	273.502	428.793	345.293	247.596	232.056	272.877	236.561	306.949
B9J08_005424	KCH1	KCH1	0	-0.0224571	-1.28529	-1.29253	2.78249e-06	6.46739	2.3312301964749e-8	141	680	174	76	332	293	57	96	166	141	157	161	343	118	274	90	195	430	81	67	101	38	95	110	61.247	94.801	90.476	66.151	84.818	81.035	71.531	83.58	80.356	75.199	63.778	87.419	158.241	154.805	185.193	122.78
B9J08_001932	ASR1	NA	0	-0.323635	1.57816	1.45669	9.96118334731105e-7	8.75522	6.35862491749359e-9	1046	2304	755	518	998	1155	381	632	981	674	1145	653	633	229	484	174	299	513	1035	971	1324	409	1213	1668	454.355	321.208	392.585	450.87	254.966	319.438	478.127	550.237	474.877	359.461	465.13	354.561	292.031	300.428	327.13	237.374
B9J08_000187	ARF3	ARF3	0	0.0495376	-1.02341	-1.84965	3.10066e-06	7.13191	2.76567933772062e-8	258	934	241	134	523	436	70	106	253	137	190	199	688	222	508	243	327	809	130	166	306	44	116	164	112.068	130.212	125.315	116.634	133.614	120.584	87.845	92.287	122.471	73.065	77.183	108.052	317.405	291.244	343.351	331.505
B9J08_002280	GAP4	SAM3	0	-0.253398	-1.35637	-1.69804	3.10066e-06	7.90575	2.78335935757103e-8	792	2041	520	370	1153	1073	212	280	468	358	531	413	896	302	619	228	375	858	137	191	275	64	176	228	344.024	284.542	270.389	322.05	294.565	296.759	266.045	243.776	226.547	190.93	215.707	224.248	413.364	396.197	418.374	311.042
B9J08_005421	SAP3	YPS3	0	-0.224944	-1.62403	-1.96172	4.50021e-06	5.27852	4.12945259364736e-8	47	115	32	29	50	62	33	22	39	31	51	31	290	134	239	68	158	358	75	56	54	35	47	57	20.416	16.033	16.639	25.242	12.774	17.147	41.413	19.154	18.879	16.533	20.718	16.832	133.79	175.796	161.537	92.767
B9J08_003397	ATC1	ATH1	0	-0.294603	1.51964	1.49062	8.82262e-06	7.63651	8.79973833036681e-8	449	1181	356	225	576	664	211	213	304	463	538	264	266	125	195	109	115	218	716	308	473	337	436	544	195.034	164.647	185.113	195.841	147.155	183.642	264.79	185.444	147.158	246.929	218.55	143.345	122.718	163.989	131.798	148.7
B9J08_000050	KRE9	KRE9	0	-0.0756634	1.51559	1.40011	0.000249395	2.1612	5.77096e-06	1	9	0	0	2	4	3	2	2	2	2	1	24	12	18	6	20	23	47	25	60	34	33	50	0.434	1.255	0	0	0.511	1.106	3.765	1.741	0.968	1.067	0.812	0.543	11.072	15.743	12.166	8.185
B9J08_000210	NA	NA	0	-0.0166088	1.46224	1.11563	0.00351541	6.68523	0.000180224	232	534	164	154	263	251	177	100	202	177	254	146	187	64	78	83	69	137	284	158	302	163	192	185	100.775	74.447	85.277	134.042	67.19	69.419	222.122	87.063	97.783	94.398	103.182	79.274	86.271	83.962	52.719	113.23
B9J08_004101	NA	NA	0	-0.168624	1.45941	1.90899	0.0019512	6.1937	8.52409e-05	161	171	68	86	94	121	71	44	51	64	66	47	185	102	85	97	65	142	426	169	286	342	357	359	69.934	23.84	35.359	74.855	24.015	33.465	89.1	38.308	24.688	34.133	26.811	25.52	85.349	133.815	57.45	132.329
B9J08_005443	NA	PAA1	0	-0.133614	-0.811036	-1.01675	1.09557e-05	8.35397	1.11458018758177e-7	870	2827	726	496	1792	1415	278	388	811	656	851	595	960	305	608	222	503	896	262	214	416	148	266	313	377.905	394.121	377.505	431.721	457.814	391.346	348.87	337.804	392.584	349.861	345.7	323.069	442.89	400.133	410.94	302.856
B9J08_002372	NA	NA	0	0.27539	1.40118	1.55391	3.55624018271944e-9	7.87653	4.25642152330274e-12	663	1807	565	320	1023	992	322	402	707	564	843	607	230	93	143	96	139	294	334	272	428	232	420	444	287.99	251.92	293.789	278.53	261.353	274.357	404.087	349.993	342.24	300.795	342.45	329.585	106.109	122.008	96.652	130.965
B9J08_003788	NA	YEL1	0	-0.126601	-0.904306	-1.55788	1.19668e-05	5.49677	1.25431214833052e-7	96	344	90	49	206	158	38	44	72	58	93	66	212	62	90	47	88	163	53	43	58	24	38	33	41.7	47.958	46.798	42.65	52.628	43.698	47.687	38.308	34.853	30.933	37.779	35.836	97.805	81.338	60.83	64.118
B9J08_002694	NA	PET18	0	-0.104381	1.29497	1.62593	0.000378723	7.33545	9.97235e-06	981	1899	526	494	999	1082	375	399	536	608	893	481	111	48	63	48	46	97	220	90	161	145	164	233	426.12	264.746	273.509	429.98	255.221	299.249	470.598	347.381	259.464	324.261	362.761	261.17	51.209	62.972	42.581	65.482
B9J08_004770	NA	NA	0	-0.315846	1.29002	1.07316	0.00254454	4.59736	0.000121314	59	172	39	22	74	99	17	25	40	57	54	43	36	15	27	18	10	33	81	41	44	45	54	39	25.628	23.979	20.279	19.149	18.905	27.38	21.334	21.766	19.363	30.399	21.936	23.348	16.608	19.679	18.249	24.556
B9J08_004698	NA	YHR131C	0	0.00242485	1.28446	1.33854	6.08799e-06	7.32449	5.8293183026189e-8	378	1367	310	263	716	738	161	215	398	443	505	338	200	76	105	95	92	155	307	212	246	191	243	318	164.193	190.578	161.194	228.917	182.921	204.108	202.043	187.185	192.661	236.263	205.145	183.525	92.269	99.705	70.968	129.601
B9J08_003837	NAG1	NA	0	0.0423638	1.27128	1.75595	1.33419e-06	6.5809	9.62687501365173e-9	269	777	183	155	425	443	85	138	215	226	294	242	87	45	76	44	55	99	146	132	141	85	198	327	116.846	108.324	95.156	134.913	108.578	122.52	106.669	120.147	104.076	120.531	119.431	131.399	40.137	59.036	51.367	60.026
B9J08_000901	PDC11	PDC1	0	-0.252979	1.2689	1.39214	2.36246e-06	7.95792	1.93219065903405e-8	622	2016	547	285	954	883	190	335	637	542	643	570	323	151	194	134	113	281	700	268	480	357	475	559	270.18	281.057	284.429	248.066	243.725	244.211	238.436	291.661	308.355	289.062	261.204	309.495	149.014	198.099	131.122	182.805
B9J08_001287	NA	NA	0	-0.651953	-1.32282	-2.2249	1.38367e-05	5.29045	1.62850173979153e-7	72	210	55	41	133	119	28	39	79	57	70	48	233	79	154	24	108	166	47	43	64	13	33	33	31.275	29.277	28.599	35.687	33.978	32.912	35.138	33.955	38.242	30.399	28.436	26.063	107.493	103.641	104.087	32.741
B9J08_002119	NA	NA	0	0.125741	1.24622	1.75087	0.00447543	4.97542	0.000247296	86	182	35	55	69	81	41	29	45	74	106	44	40	14	33	25	17	49	57	49	66	63	77	95	37.356	25.373	18.199	47.872	17.628	22.402	51.452	25.248	21.783	39.466	43.06	23.891	18.454	18.367	22.304	34.105
B9J08_003908	SIT1	SIT1	0	0.289565	1.24615	2.74802	0.00812034	3.09783	0.000582824	39	99	27	44	77	77	8	6	23	25	34	20	4	1	5	5	2	5	10	6	5	8	14	41	16.941	13.802	14.039	38.298	19.672	21.296	10.039	5.224	11.134	13.333	13.812	10.859	1.845	1.312	3.379	6.821
B9J08_004838	PST3	PST2	0	-0.576288	1.21491	1.19534	0.00121297	9.80488	4.71833e-05	2979	4439	1308	1556	2445	2416	1226	932	1311	1382	2180	942	1594	666	969	406	541	1052	3173	1341	2142	1632	2068	2091	1294	618.855	680.133	1354.35	624.641	668.193	1538.54	811.426	634.621	737.054	885.576	511.481	735.382	873.733	654.935	553.872
B9J08_004741	orf19.1449	DDI3	0	0.092045	-1.16123	-1.35772	3.18418e-05	6.68232	4.00165911352559e-7	152	439	111	84	267	210	54	70	119	128	133	106	617	223	334	257	284	574	225	80	154	115	116	131	66.025	61.202	57.718	73.114	68.212	58.08	67.766	60.944	57.605	68.266	54.028	57.555	284.649	292.556	225.746	350.604
B9J08_004730	MSK1	MSK1	0	0.383271	-0.689247	-0.911269	3.22912e-05	5.48592	4.12254907638319e-7	99	399	107	56	223	182	27	64	119	99	128	90	110	38	80	44	75	161	40	28	49	14	35	49	43.003	55.626	55.638	48.743	56.971	50.336	33.883	55.72	57.605	52.799	51.997	48.868	50.748	49.853	54.071	60.026
B9J08_000159	MSB2	MSB2	0	0.188411	-0.896757	-1.39428	3.30897e-05	7.02648	4.29050773266885e-7	179	496	140	125	271	229	72	63	109	91	180	87	835	245	651	342	444	973	212	206	337	103	157	258	77.753	69.149	72.797	108.801	69.234	63.334	90.355	54.85	52.764	48.533	73.121	47.239	385.222	321.418	440.003	466.562
B9J08_004976	NA	NA	0	0.644091	-1.38049	-1.34176	3.38439e-05	5.30692	4.45580376103199e-7	80	187	56	40	100	99	74	35	52	52	87	41	174	57	96	82	130	257	34	23	46	22	38	41	34.75	26.07	29.119	34.816	25.548	27.38	92.865	30.472	25.172	27.733	35.342	22.262	80.274	74.779	64.885	111.866
B9J08_002730	NA	NA	0	0.118816	-0.769738	-1.05751	3.38774e-05	7.20811	4.52780085931994e-7	401	1145	317	186	726	533	119	203	321	287	463	260	441	131	285	135	226	515	117	115	179	52	105	178	174.184	159.628	164.834	161.895	185.476	147.412	149.336	176.738	155.388	153.064	188.083	141.173	203.453	171.86	192.628	184.169
B9J08_001239	NA	SVL3	0	0.156858	-0.878708	-1.0748	3.4649e-05	6.88018	4.70004776169343e-7	316	1048	293	127	523	453	80	147	305	212	260	288	366	86	271	118	186	421	95	78	138	49	85	128	137.262	146.105	152.354	110.541	133.614	125.286	100.394	127.982	147.643	113.065	105.619	156.376	168.852	112.824	183.166	160.978
B9J08_001714	NA	NA	0	0.0361041	1.19032	1.55848	0.00433581	3.97906	0.000237452	40	83	19	20	39	38	20	13	26	38	45	14	20	11	18	10	12	24	41	20	33	28	38	50	17.375	11.571	9.88	17.408	9.964	10.51	25.099	11.318	12.586	20.266	18.28	7.602	9.227	14.431	12.166	13.642
B9J08_001131	NA	FRK1	0	0.300286	-1.14553	-1.28355	3.68859e-05	5.37835	5.15063626920606e-7	66	195	53	43	116	113	27	31	43	51	104	42	212	60	131	97	105	249	41	31	83	22	54	54	28.669	27.186	27.559	37.427	29.635	31.252	33.883	26.989	20.815	27.2	42.248	22.805	97.805	78.715	88.541	132.329
B9J08_003624	DCK1	YLR422W	0	-0.0878216	-0.748921	-1.00911	3.83488e-05	6.05747	5.43140243337244e-7	123	378	100	60	186	175	40	63	93	83	126	75	303	102	172	74	154	279	93	83	105	37	81	113	53.428	52.698	51.998	52.224	47.519	48.4	50.197	54.85	45.019	44.266	51.185	40.723	139.787	133.815	116.253	100.952
B9J08_003779	NA	SEM1	0	0.00429485	-0.59471	-0.529676	3.86641e-05	9.00655	5.5531895316083e-7	1522	5227	1405	776	2782	2448	500	819	1410	1344	1612	1266	1064	376	705	325	571	1141	430	282	478	276	406	482	661.116	728.712	730.571	675.435	710.736	677.043	627.464	713.045	682.544	716.788	654.839	687.404	490.87	493.278	476.501	443.371
B9J08_004834	CDC10	CDC10	0	0.0128364	-0.623204	-0.799557	4.03467e-05	7.20221	5.87534754260169e-7	290	1059	304	147	580	563	138	163	349	217	328	271	507	133	285	142	222	474	169	115	194	81	134	194	125.968	147.639	158.074	127.95	148.177	155.709	173.18	141.913	168.942	115.731	133.243	147.146	233.901	174.484	192.628	193.719
B9J08_004171	TYE7	TYE7	0	0.0885557	1.17668	1.60561	0.00486946	9.61763	0.000276839	1391	4206	1213	1307	2526	2405	574	655	1146	1258	1742	989	1230	424	996	311	934	1594	1474	1616	1791	565	2700	5557	604.213	586.372	630.735	1137.62	645.334	665.15	720.328	570.262	554.749	670.922	707.648	537	567.453	556.25	673.184	424.272
B9J08_000543	TRX1	TRX1	0	-0.151251	0.517957	0.469458	5.3812e-05	9.62388	8.08875271762767e-7	1538	5461	1423	714	2801	2507	529	842	1579	1245	1744	1367	1602	620	1246	558	753	1605	1598	1071	1507	903	1306	1601	668.066	761.335	739.931	621.469	715.59	693.36	663.856	733.07	764.353	663.989	708.461	742.244	739.073	813.385	842.156	761.233
B9J08_000918	PHR1	GAS1	0	0.22646	-2.70782	-2.66824	5.3812e-05	4.88258	8.15821733338107e-7	63	262	71	46	146	100	22	20	64	58	95	44	161	51	115	27	114	273	8	26	14	5	12	25	27.366	36.526	36.919	40.039	37.3	27.657	27.608	17.413	30.981	30.933	38.592	23.891	74.276	66.907	77.727	36.834
B9J08_004667	NA	NA	0	-0.278757	1.16977	1.4604	1.74526e-06	7.97879	1.39258813436231e-8	649	1505	379	264	659	686	236	301	420	428	602	420	415	173	257	137	148	379	653	344	652	496	638	690	281.908	209.817	197.072	229.787	168.359	189.727	296.163	262.059	203.311	228.263	244.549	228.049	191.458	226.961	173.703	186.898
B9J08_001477	PRE1	PRE1	0	0.225411	-0.656216	-0.848204	5.63757e-05	6.91902	8.77180427417205e-7	365	1287	336	178	716	604	115	181	390	321	359	262	281	76	170	89	165	304	106	70	93	63	63	103	158.546	179.425	174.713	154.932	182.921	167.048	144.317	157.584	188.789	171.197	145.836	142.259	129.638	99.705	114.901	121.415
B9J08_001613	PHO100	NA	0	-0.088227	-1.90831	-1.64027	5.64817e-05	6.97328	8.90097165220436e-7	149	323	64	82	142	126	61	51	69	94	151	66	1676	453	925	533	612	1344	149	180	352	104	294	413	64.722	45.03	33.279	71.373	36.278	34.848	76.551	44.402	33.401	50.133	61.34	35.836	773.213	594.296	625.196	727.128
B9J08_001426	PGA54	NA	0	-0.221067	-0.946119	-1.70059	5.75223e-05	7.76084	9.17970708629355e-7	449	1030	248	235	497	511	147	167	282	246	305	217	1209	353	969	278	540	1292	273	303	498	102	257	256	195.034	143.596	128.955	204.545	126.972	141.327	184.474	145.395	136.509	131.198	123.899	117.825	557.765	463.104	654.935	379.252
B9J08_003838	DAC1	NA	0	0.152677	1.1015	1.438	0.00624316	4.34885	0.000397281	37	103	26	20	53	55	30	21	28	40	43	29	25	18	25	13	21	34	45	44	33	18	54	79	16.072	14.36	13.519	17.408	13.54	15.211	37.648	18.283	13.554	21.333	17.468	15.746	11.534	23.614	16.897	17.735
B9J08_002356	NA	NA	0	0.625584	1.08604	1.27758	1.33419e-06	8.69593	1.02166142436343e-8	1170	3444	834	607	2294	2043	436	786	1036	1010	1645	998	439	152	276	225	357	630	579	369	586	351	677	636	508.217	480.139	433.663	528.336	586.064	565.032	547.148	684.314	501.501	538.658	668.244	541.887	202.53	199.41	186.545	306.949
B9J08_001852	NA	STP2	0	-0.431729	1.08136	1.41926	0.00705226	7.67382	0.000471276	986	1657	448	585	931	1028	435	390	612	743	947	354	205	82	134	27	84	216	255	214	272	98	377	614	428.292	231.008	232.951	509.187	237.849	284.314	545.893	339.545	296.253	396.26	384.697	192.212	94.576	107.577	90.569	36.834
B9J08_002406	PRE3	PRE3	0	0.222072	-0.463523	-0.591389	8.16505e-05	9.01983	1.36817e-06	1519	5125	1398	814	2879	2463	455	896	1436	1213	1661	1348	1105	325	703	343	632	1377	401	331	516	211	433	463	659.813	714.492	726.932	708.51	735.518	681.191	570.992	780.083	695.13	646.923	674.744	731.928	509.785	426.371	475.149	467.927
B9J08_003094	NA	DBP10	0	0.044343	-0.818962	-1.31511	9.54767e-05	6.15397	1.63794e-06	137	456	136	74	299	186	55	76	123	96	122	111	326	62	210	82	144	317	101	51	112	38	69	69	59.509	63.572	70.717	64.41	76.388	51.442	69.021	66.168	59.541	51.199	49.56	60.27	150.398	81.338	141.936	111.866
B9J08_005437	orf19.6200	PRY2	0	0.0855859	-1.40792	-1.92025	9.54767e-05	8.07537	1.63688e-06	590	1293	340	478	660	659	219	196	315	323	458	241	1641	465	1022	435	884	1805	246	269	449	89	231	375	256.28	180.261	176.793	416.054	168.615	182.259	274.829	170.643	152.483	172.264	186.052	130.857	757.065	610.038	690.757	593.435
B9J08_002608	TPM2	TPM1	0	-0.039951	-0.633204	-0.974524	9.68548e-05	9.60733	1.6809e-06	1707	7395	1988	1031	4719	3480	579	953	2094	1609	2072	1904	2193	659	1303	506	1127	2258	705	575	884	325	646	678	741.475	1030.96	1033.72	897.388	1205.6	962.463	726.603	829.709	1013.65	858.119	841.703	1033.82	1011.73	864.549	880.682	690.294
B9J08_002568	PRE6	PRE6	0	0.185559	-0.700865	-1.05021	0.000107359	7.72002	1.90603e-06	657	2576	608	351	1491	1111	179	288	675	501	727	505	595	148	241	140	249	660	153	129	181	58	118	188	285.383	359.128	316.148	305.512	380.916	307.269	224.632	250.741	326.75	267.196	295.327	274.201	274.5	194.163	162.889	190.99
B9J08_003015	orf19.1433	LPX1	0	-0.09928	-0.486958	-1.83165	0.000107359	4.52595	1.89859e-06	35	139	22	21	47	45	14	12	21	28	33	18	127	46	90	43	54	134	67	38	52	23	16	23	15.203	19.378	11.44	18.279	12.007	12.446	17.569	10.448	10.166	14.933	13.406	9.774	58.591	60.348	60.83	58.661
B9J08_000443	BUD2	BUD2	0	-0.433202	-0.899475	-1.525	0.000109877	5.31104	1.97266e-06	91	291	66	49	135	136	32	32	61	66	70	59	170	51	120	39	72	119	42	53	57	18	28	48	39.528	40.569	34.319	42.65	34.489	37.613	40.158	27.86	29.529	35.199	28.436	32.035	78.428	66.907	81.107	53.204
B9J08_001853	NA	FMP52	0	-0.15147	1.07873	0.847523	0.00103181	9.54045	3.82836e-05	2250	6310	1608	1460	3378	3223	738	1196	2044	2063	2622	1491	892	427	554	293	452	863	1853	803	944	797	809	1098	977.34	879.697	836.127	1270.79	863.001	891.384	926.136	1041.27	989.447	1100.25	1065.13	809.573	411.519	560.186	374.442	399.716
B9J08_000595	NA	NA	0	0.117159	-1.19436	-1.19697	0.000111746	5.87908	2.05079e-06	111	238	68	49	156	136	37	45	55	75	108	46	399	77	216	116	171	348	70	63	97	35	90	99	48.215	33.18	35.359	42.65	39.854	37.613	46.432	39.178	26.624	39.999	43.873	24.977	184.076	101.017	145.992	158.249
B9J08_001002	TOS1	TOS1	0	0.119144	-0.960052	-1.31089	0.000114742	10.1925	2.15088e-06	2164	6114	1634	1061	3013	3059	744	972	1620	1399	1768	1354	5761	1694	3993	2004	2949	6292	1107	1381	2453	466	1528	2039	939.984	852.372	849.647	923.5	769.752	846.027	933.666	846.251	784.2	746.121	718.21	735.186	2657.8	2222.38	2698.82	2733.89
B9J08_005561	NA	NA	0	-0.372741	1.03956	1.90554	0.00334222	2.254	0.000170011	5	8	2	4	15	12	4	6	2	4	5	3	8	6	11	5	5	7	29	5	14	13	33	29	2.172	1.115	1.04	3.482	3.832	3.319	5.02	5.224	0.968	2.133	2.031	1.629	3.691	7.871	7.435	6.821
B9J08_000476	HSP104	HSP104	0	-0.33411	1.03535	1.32597	0.000167704	9.05707	3.42635e-06	1316	3655	957	825	1850	1810	611	671	954	1161	1555	914	739	319	533	164	367	760	1223	719	871	416	1232	2191	571.635	509.555	497.621	718.084	472.632	500.591	766.76	584.192	461.807	619.19	631.684	496.277	340.933	418.5	360.248	223.732
B9J08_003627	HSP21	NA	0	-0.146418	1.03527	1.41531	0.00970273	11.4823	0.000755746	8045	16673	4651	6035	9027	8878	4006	3520	4898	7513	8849	3054	4188	1525	2695	1004	2272	4156	4640	4378	5177	2152	6648	13168	3494.53	2324.43	2418.43	5252.9	2306.19	2455.39	5027.24	3064.61	2370.99	4006.87	3594.71	1658.24	1932.11	2000.66	1821.52	1369.67
B9J08_001171	ADH5	ADH2	0	-0.26572	1.03414	1.43143	0.00987625	10.6374	0.00077229	4613	10920	2788	2710	5424	6615	1872	2176	2969	4005	5288	2560	1684	894	1677	456	1117	2114	1809	2897	2931	820	4207	8314	2003.76	1522.39	1449.7	2358.8	1385.71	1829.51	2349.22	1894.49	1437.22	2135.97	2148.13	1390.01	776.903	1172.85	1133.46	622.083
B9J08_004019	NA	YPL264C	0	-0.34762	1.0285	1.08732	0.00103233	4.43711	3.85092e-05	57	141	39	33	65	56	20	28	41	36	51	35	30	17	23	16	17	20	50	28	41	30	38	51	24.759	19.657	20.279	28.723	16.606	15.488	25.099	24.378	19.847	19.2	20.718	19.004	13.84	22.302	15.545	21.827
B9J08_005227	NA	NA	0	0.00642515	1.01844	1.03283	1.29517e-05	7.14247	1.47266214187524e-7	399	1005	272	177	568	518	167	168	351	326	387	299	183	73	143	60	103	219	289	157	242	166	224	256	173.315	140.11	141.434	154.062	145.111	143.263	209.573	146.266	169.91	173.864	157.21	162.349	84.426	95.769	96.652	81.853
B9J08_003404	NA	GIP2	0	0.284203	0.975668	1.15305	0.000155929	6.79944	3.04828e-06	328	907	182	179	466	407	109	158	256	269	344	189	145	50	100	63	92	175	176	115	194	99	184	250	142.474	126.448	94.636	155.803	119.052	112.564	136.787	137.559	123.923	143.464	139.742	102.622	66.895	65.596	67.589	85.946
B9J08_000584	NA	GTS1	0	0.316856	0.967791	0.79946	0.00627678	6.30426	0.000403522	184	674	252	91	329	264	54	85	209	167	223	149	132	27	83	60	60	151	149	101	128	84	107	130	79.925	93.964	131.035	79.207	84.052	73.014	67.766	74.003	101.171	89.065	90.589	80.903	60.897	35.422	56.099	81.853
B9J08_000890	NA	NA	0	-0.0635721	-0.569858	-0.965392	0.000167704	11.0259	3.44574e-06	3345	13990	3526	1694	7394	6374	1034	2048	3956	2812	3759	3641	7870	2557	5486	2779	3437	7542	2844	2384	3530	1071	2630	3023	1452.98	1950.39	1833.45	1474.47	1888.99	1762.86	1297.6	1783.05	1915	1499.71	1527.01	1976.96	3630.78	3354.56	3707.92	3791.16
B9J08_003050	SMP2	PAH1	0	0.169997	-0.238006	-1.09915	0.000167704	7.08905	3.42845e-06	337	1056	338	202	723	560	148	170	278	270	344	264	385	100	214	119	164	455	223	106	154	60	78	111	146.384	147.22	175.753	175.822	184.71	154.879	185.729	148.007	134.573	143.998	139.742	143.345	177.617	131.191	144.64	162.342
B9J08_000117	PGA31	NA	0	1.56236	-0.59367	-1.70014	0.000178542	1.38565	3.73965e-06	1	7	3	1	1	2	0	2	2	1	2	1	15	9	12	31	22	50	11	1	12	2	4	2	0.434	0.976	1.56	0.87	0.255	0.553	0	1.741	0.968	0.533	0.812	0.543	6.92	11.807	8.111	42.291
B9J08_000849	ASR2	NA	0	-0.337825	0.959956	0.978533	1.29247184815011e-7	9.89378	4.89865651602875e-10	3194	7910	2335	1433	4176	3996	1298	1571	2691	2236	3121	2246	1230	441	844	346	518	945	1605	1004	1485	918	1477	1485	1387.39	1102.76	1214.15	1247.29	1066.87	1105.17	1628.89	1367.76	1302.64	1192.51	1267.84	1219.52	567.453	578.553	570.449	472.019
B9J08_002891	CAT8	CAT8	0	-0.390507	-1.32982	-1.84384	0.000185183	4.95167	3.9157e-06	61	157	59	23	91	102	46	27	52	27	63	53	174	54	92	40	60	122	36	25	42	13	25	31	26.497	21.888	30.679	20.019	23.248	28.21	57.727	23.507	25.172	14.4	25.592	28.778	80.274	70.843	62.182	54.569
B9J08_002174	NAA25	MDM20	0	-0.257148	0.952803	0.89117	1.58174e-05	5.30444	1.89316739444049e-7	73	247	55	46	142	130	29	36	83	67	89	62	71	31	48	27	28	62	104	56	85	56	84	83	31.709	34.435	28.599	40.039	36.278	35.954	36.393	31.343	40.178	35.733	36.154	33.664	32.755	40.669	32.443	36.834
B9J08_001086	TRX1	TRX1	0	0.117542	0.943071	0.842189	5.31704e-05	7.28211	7.84881734151928e-7	332	1050	282	156	492	474	125	148	304	286	386	260	247	100	203	128	129	298	375	199	333	182	298	306	144.212	146.384	146.634	135.783	125.695	131.094	156.866	128.853	147.158	152.531	156.804	141.173	113.952	131.191	137.205	174.62
B9J08_000857	PPS1	PPS1	0	-0.399004	-1.55863	-2.82157	0.000202399	2.87399	4.37076e-06	13	14	0	4	8	5	3	3	2	3	4	1	148	38	126	37	50	130	19	27	43	8	11	14	5.647	1.952	0	3.482	2.044	1.383	3.765	2.612	0.968	1.6	1.625	0.543	68.279	49.853	85.162	50.476
B9J08_001792	NA	NA	0	-0.475289	0.941712	1.12857	0.000275085	4.64268	6.74954e-06	53	218	72	24	114	114	20	37	73	71	58	43	33	16	26	7	12	31	50	23	49	25	52	55	23.022	30.392	37.439	20.89	29.124	31.529	25.099	32.213	35.337	37.866	23.561	23.348	15.224	20.991	17.573	9.55
B9J08_001106	PRX1	PRX1	0	-0.0251185	0.930712	1.09715	3.03817e-06	8.02353	2.60605137200678e-8	599	1850	517	292	867	914	255	294	530	498	695	463	415	132	304	157	211	370	579	280	512	311	551	556	260.19	257.914	268.83	254.158	221.498	252.785	320.006	255.965	256.559	265.596	282.328	251.397	191.458	173.172	205.47	214.182
B9J08_003007	NA	NA	0	-0.21071	-1.13456	-1.72923	0.000233312	4.94987	5.21265e-06	67	132	48	36	75	68	26	29	34	37	38	19	184	66	109	50	63	186	42	38	55	14	35	37	29.103	18.403	24.959	31.335	19.161	18.807	32.628	25.248	16.459	19.733	15.437	10.316	84.887	86.586	73.672	68.211
B9J08_005183	NA	GOR1	0	-0.150227	-0.756976	-0.905713	0.0002388	6.25704	5.38289e-06	178	559	162	99	291	276	65	93	181	140	198	136	230	70	166	74	121	179	83	48	97	42	81	73	77.318	77.932	84.237	86.17	74.344	76.333	81.57	80.968	87.617	74.665	80.433	73.844	106.109	91.834	112.197	100.952
B9J08_001590	NA	NA	0	-0.216572	0.886813	0.862002	0.00052197	12.2961	1.57064e-05	12409	29443	7594	6147	15668	15428	4007	5388	8318	9048	12257	7107	9391	3929	6011	3695	3684	7735	14443	6968	9905	7329	9362	11131	5390.14	4104.74	3948.73	5350.38	4002.81	4266.92	5028.49	4690.95	4026.53	4825.52	4979.13	3858.91	4332.48	5154.5	4062.76	5040.78
B9J08_002807	ARE2	ARE2	0	-0.0713732	0.884947	0.892616	0.000921018	5.13495	3.25195e-05	97	220	52	38	168	126	27	52	69	62	95	58	56	25	35	17	31	54	63	47	68	45	54	74	42.134	30.671	27.039	33.075	42.92	34.848	33.883	45.273	33.401	33.066	38.592	31.492	25.835	32.798	23.656	23.192
B9J08_004496	NA	YPR127W	0	0.0184004	0.879952	0.742287	0.000270554	7.04114	6.42098e-06	258	935	260	153	463	406	96	166	258	230	338	209	232	92	146	111	105	220	308	162	267	135	247	247	112.068	130.351	135.195	133.172	118.286	112.287	120.473	144.524	124.891	122.665	137.305	113.481	107.032	120.696	98.68	151.428
B9J08_001854	NA	STP2	0	-0.0595389	0.87895	0.873231	0.00970273	7.01237	0.000756786	365	647	223	210	362	395	119	150	238	218	317	142	227	95	146	91	108	215	275	191	256	182	221	276	158.546	90.2	115.955	182.785	92.483	109.245	149.336	130.594	115.21	116.265	128.774	77.102	104.725	124.632	98.68	124.144
B9J08_000613	GLT1	GLT1	0	0.113122	-0.537416	-1.04913	0.000270554	6.66805	6.42249e-06	295	1052	309	181	645	504	103	172	321	249	352	301	211	68	149	53	142	250	100	58	86	23	67	78	128.14	146.663	160.674	157.543	164.783	139.391	129.257	149.748	155.388	132.798	142.992	163.435	97.344	89.21	100.707	72.304
B9J08_000483	HSP70	SSA4	0	-0.426195	0.876426	1.11109	0.000202399	9.63592	4.42225e-06	1879	8609	2122	1252	5606	4275	861	1297	2813	2138	2759	2053	736	502	579	261	335	745	1717	661	818	618	1039	1904	816.188	1200.21	1103.4	1089.75	1432.2	1182.34	1080.49	1129.21	1361.7	1140.25	1120.78	1114.72	339.549	658.579	391.339	356.061
B9J08_001793	ALG6	ALG6	0	0.255178	0.8739	0.947239	0.0074043	4.6516	0.000503664	39	140	42	27	68	77	14	21	39	33	49	46	47	21	31	13	37	62	55	42	54	50	48	58	16.941	19.518	21.839	23.501	17.372	21.296	17.569	18.283	18.879	17.6	19.905	24.977	21.683	27.55	20.953	17.735
B9J08_000374	SMI1B	SMI1	0	0.102222	-0.987504	-1.39975	0.000274948	4.89971	6.69134e-06	78	221	55	41	117	101	23	35	58	47	81	59	102	33	68	33	63	105	19	20	52	9	19	34	33.881	30.81	28.599	35.687	29.891	27.934	28.863	30.472	28.076	25.066	32.904	32.035	47.057	43.293	45.96	45.019
B9J08_004964	NA	YJL016W	0	0.11216	0.865587	0.767067	0.0082714	7.76887	0.000604517	519	1405	370	277	748	712	191	223	325	383	495	324	390	173	225	194	184	404	611	249	415	247	350	485	225.44	195.875	192.392	241.102	191.097	196.918	239.691	194.15	157.324	204.263	201.083	175.923	179.924	226.961	152.075	264.658
B9J08_003067	WSC4	WSC4	0	0.071638	0.838461	0.932385	0.00894946	5.92389	0.000669469	113	510	205	62	241	215	59	76	139	111	198	110	88	34	59	32	47	98	81	94	97	76	86	115	49.084	71.101	106.596	53.965	61.57	59.463	74.041	66.168	67.286	59.199	80.433	59.727	40.598	44.605	39.877	43.655
B9J08_000466	NA	NA	0	0.206991	-0.768849	-0.98397	0.000310717	4.80088	7.75854e-06	41	159	46	20	107	84	16	26	46	32	36	27	141	36	66	46	68	137	31	25	63	15	36	44	17.809	22.167	23.919	17.408	27.336	23.232	20.079	22.636	22.267	17.066	14.624	14.66	65.05	47.229	44.609	62.754
B9J08_005509	CUP5	VMA3	0	-0.0480702	0.512134	0.554082	0.000310717	9.0011	7.80977e-06	937	3212	783	470	1610	1499	333	511	800	810	1016	781	1094	413	898	435	537	1173	1113	658	1139	616	1054	1137	407.008	447.795	407.144	409.091	411.318	414.578	417.891	444.891	387.259	431.993	412.727	424.062	504.71	541.819	606.947	593.435
B9J08_001859	NA	FES1	0	-0.304111	0.830313	0.734178	0.000626742	7.19267	2.00037e-05	265	1115	298	179	589	614	130	177	304	303	354	348	220	108	172	62	109	219	304	199	256	83	301	378	115.109	155.446	154.954	155.803	150.476	169.814	163.141	154.101	147.158	161.597	143.805	188.955	101.496	141.686	116.253	84.581
B9J08_002526	CUE5	CUE5	0	0.0195068	-0.53303	-0.628101	0.000327881	8.69216	8.31051e-06	979	3070	775	412	1995	1455	341	418	923	724	953	697	1338	397	695	396	619	1173	510	317	535	284	420	484	425.252	427.998	402.984	358.607	509.676	402.409	427.93	363.923	446.8	386.127	387.135	378.452	617.278	520.829	469.742	540.23
B9J08_003306	TDH3	TDH2	0	0.15325	0.827523	1.41747	0.00227545	12.841	0.000103905	18984	79235	22447	8431	41403	41105	4207	12754	23137	19204	25442	22916	7302	2863	6284	3170	4921	8634	6892	8751	8633	4517	14752	21696	8246.14	11046.4	11672	7338.39	10577.5	11368.4	5279.48	11104	11200	10242	10335.2	12442.8	3368.73	3756	4247.28	4324.57
B9J08_005552	orf19.5711	CSR1	0	-0.0672892	-1.00556	-1.69146	0.000346207	7.50895	8.97803e-06	268	698	171	187	308	325	112	76	137	199	176	115	1478	418	885	526	535	1267	517	236	392	187	209	250	116.412	97.31	88.917	162.766	78.687	89.885	140.552	66.168	66.318	106.132	71.496	62.442	681.866	548.379	598.161	717.578
B9J08_001458	RBT1	NA	0	0.148127	-1.51198	-2.42628	0.000351815	11.2063	9.19364e-06	7968	12758	3422	5639	6939	7942	749	687	641	1495	2643	709	20271	5927	15544	8161	10058	23038	2935	2996	6487	1316	2708	1930	3461.09	1778.63	1779.37	4908.22	1772.75	2196.52	939.94	598.122	310.291	797.32	1073.66	384.968	9351.9	7775.69	10506	11133.4
B9J08_002459	PIL1	LSP1	0	-0.232654	0.82536	0.671469	0.000114742	9.75779	2.15155e-06	1584	4283	1061	840	1970	2173	681	848	1382	1259	1742	1093	2078	710	1477	636	865	1824	2136	1634	2468	851	2153	2763	688.047	597.106	551.698	731.14	503.289	600.986	854.605	738.293	668.99	671.456	707.648	593.47	958.673	931.457	998.286	867.642
B9J08_000493	NA	YBL029C-A	0	-0.415321	0.815105	0.839874	1.29604e-05	7.59734	1.49950806414152e-7	387	1765	410	167	894	780	121	275	491	402	543	415	310	122	233	81	118	280	377	260	345	230	310	408	168.102	246.064	213.192	145.358	228.396	215.724	151.846	239.423	237.68	214.396	220.582	225.334	143.017	160.053	157.482	110.502
B9J08_002110	SIT1	ARN1	0	0.448135	0.805458	1.57134	0.000737758	6.48379	2.53131e-05	222	423	142	126	277	263	78	91	98	128	148	81	147	71	95	56	117	242	188	107	169	163	269	315	96.431	58.972	73.837	109.671	70.767	72.738	97.884	79.227	47.439	68.266	60.122	43.981	67.818	93.146	64.209	76.396
B9J08_004029	orf19.3854	SAT4	0	0.33745	-0.974517	-0.368871	0.000475518	4.71676	1.28057e-05	46	169	57	27	88	86	25	32	42	41	57	52	74	31	47	28	47	106	19	19	26	17	37	40	19.981	23.561	29.639	23.501	22.482	23.785	31.373	27.86	20.331	21.866	23.155	28.235	34.139	40.669	31.767	38.198
B9J08_002366	CCP1	CCP1	0	0.279608	-0.550779	-1.32968	0.000484073	7.16972	1.32189e-05	231	506	90	129	248	269	91	69	122	186	237	116	872	248	570	319	498	1039	376	204	362	105	212	201	100.34	70.543	46.798	112.282	63.358	74.397	114.198	60.073	59.057	99.198	96.276	62.985	402.292	325.354	385.256	435.185
B9J08_003016	BMT8	NA	0	0.481322	0.803223	1.05214	0.000342918	8.38853	8.82433e-06	1146	4971	1552	618	2760	2221	418	766	1461	1152	1515	1193	283	94	172	134	210	339	325	181	294	218	274	401	497.792	693.023	807.008	537.911	705.116	614.261	524.56	666.902	707.232	614.39	615.435	647.767	130.56	123.32	116.253	182.805
B9J08_002442	NA	UPS1	0	0.153799	-0.346027	-0.668356	0.00049012	6.24727	1.34922e-05	152	539	152	70	329	278	46	80	137	124	182	146	219	70	146	85	107	259	98	74	109	50	65	103	66.025	75.144	79.037	60.928	84.052	76.886	57.727	69.65	66.318	66.132	73.933	79.274	101.034	91.834	98.68	115.958
B9J08_000645	TSA1	TSA1	0	-0.19179	0.543268	0.928858	0.000274237	10.0093	6.61933e-06	3049	13511	3908	1588	7492	6511	882	2128	4249	3022	4111	3633	1076	381	865	308	576	1000	899	766	1133	666	1313	1606	1324.4	1883.61	2032.08	1382.2	1914.03	1800.75	1106.85	1852.7	2056.83	1611.71	1670	1972.62	496.406	499.838	584.643	420.179
B9J08_001338	RPT1	RPT1	0	0.123967	-0.596074	-0.464093	0.00049165	7.52889	1.39009e-05	524	2039	526	251	1019	983	162	308	542	465	575	480	361	121	259	144	177	435	127	111	167	84	152	193	227.612	284.263	273.509	218.472	260.331	271.868	203.298	268.154	262.368	247.996	233.581	260.627	166.545	158.741	175.055	196.447
B9J08_001703	BUD5	BUD5	0	0.0330027	-0.709418	-0.983673	0.00049165	5.97376	1.3938e-05	144	377	108	75	172	203	45	53	107	95	119	83	248	85	136	66	133	249	72	62	103	26	76	91	62.55	52.559	56.158	65.28	43.942	56.144	56.472	46.143	51.796	50.666	48.341	45.067	114.413	111.512	91.921	90.038
B9J08_003914	NA	SFK1	0	-0.115931	0.800748	0.898141	0.000484073	7.77859	1.32292e-05	505	1120	360	239	535	505	188	216	348	327	447	250	460	171	323	150	216	459	613	300	517	326	518	560	219.359	156.143	187.193	208.027	136.68	139.668	235.926	188.056	168.458	174.397	181.584	135.743	212.218	224.337	218.312	204.633
B9J08_003051	BMT8	NA	0	0.0389961	-0.746354	-0.970391	0.00049165	6.22898	1.40658e-05	139	521	178	85	339	258	55	71	124	107	161	108	246	87	170	62	149	293	67	70	117	48	75	81	60.378	72.634	92.556	73.984	86.607	71.355	69.021	61.815	60.025	57.066	65.403	58.641	113.491	114.136	114.901	84.581
B9J08_001951	CSA1	NA	0	0.993275	0.15203	0.911708	0.000980436	9.66428	3.54632e-05	2859	6065	1724	1436	4469	3660	942	958	1367	1394	2088	1316	1114	364	843	750	1065	2525	680	569	862	554	1455	1618	1241.87	845.541	896.445	1249.9	1141.73	1012.25	1182.14	834.062	661.729	743.454	848.203	714.553	513.937	477.535	569.773	1023.16
B9J08_002753	NA	NA	0	-0.042652	-0.933895	-1.74052	0.000500331	11.7664	1.4472e-05	5742	18727	4713	2992	9518	9474	1891	2801	4940	4129	5055	3832	17611	5624	15112	4751	9578	22512	3573	5350	7957	905	4238	6036	2494.17	2610.79	2450.66	2604.25	2431.63	2620.22	2373.07	2438.63	2391.32	2202.1	2053.48	2080.67	8124.73	7378.19	10214	6481.4
B9J08_002245	NA	YML131W	0	-0.393549	0.797852	1.0154	0.00513668	7.12368	0.000299204	341	2265	574	226	1162	984	135	315	655	484	669	509	117	55	101	34	53	108	124	147	130	62	158	264	148.121	315.771	298.468	196.712	296.864	272.145	169.415	274.248	317.068	258.129	271.766	276.373	53.977	72.155	68.265	46.383
B9J08_003454	ADAEC	NA	0	-0.115631	0.794386	1.05301	0.00281623	9.32729	0.000135952	1842	4609	1224	1091	2488	2364	802	918	1418	1523	1988	1147	862	343	652	241	483	963	983	804	904	387	1239	2037	800.116	642.555	636.455	949.612	635.626	653.811	1006.45	799.237	686.417	812.253	807.58	622.79	397.679	449.985	440.679	328.776
B9J08_001816	CHS7	CHS7	0	-0.089772	-0.65311	-0.8073	0.00052197	6.1359	1.53345e-05	176	590	145	64	291	236	47	85	165	125	156	129	214	65	153	64	102	207	70	69	86	35	60	104	76.45	82.254	75.397	55.706	74.344	65.27	58.982	74.003	79.872	66.666	63.371	70.044	98.728	85.274	103.411	87.31
B9J08_004672	NA	RPS22A	0	0.0181719	0.794076	1.1642	9.05906102681262e-8	8.2538	2.89138193554761e-10	599	2375	544	315	1176	1084	237	378	633	581	824	697	453	190	322	186	242	478	502	370	547	323	696	788	260.19	331.106	282.869	274.178	300.441	299.802	297.418	329.098	306.419	309.862	334.731	378.452	208.989	249.263	217.636	253.744
B9J08_000195	orf19.6681	SAY1	0	-0.21997	0.787323	0.817095	2.59955e-05	6.71004	3.2150793513819e-7	310	1081	257	146	560	501	82	154	325	311	378	288	140	53	86	45	48	134	168	96	140	93	135	162	134.656	150.706	133.635	127.079	143.067	138.561	102.904	134.077	157.324	165.864	153.554	156.376	64.588	69.531	58.126	61.39
B9J08_001084	NA	BXI1	0	0.128488	0.78713	0.746341	0.00156318	8.47824	6.48596e-05	1013	2786	839	581	1450	1458	292	476	772	913	1139	737	409	202	400	172	317	580	661	341	529	316	504	558	440.02	388.405	436.263	505.706	370.441	403.239	366.439	414.419	373.705	486.925	462.693	400.171	188.69	265.006	270.355	234.645
B9J08_003182	NA	PCF11	0	0.263868	0.457067	0.887099	0.002515	5.72929	0.000118902	137	367	110	72	212	210	42	67	101	114	160	90	86	27	62	32	54	109	69	46	85	47	88	127	59.509	51.165	57.198	62.669	54.161	58.08	52.707	58.332	48.891	60.799	64.996	48.868	39.676	35.422	41.905	43.655
B9J08_001102	RSR1	RSR1	0	-0.0176197	-0.940281	-0.847951	0.000557924	6.2646	1.70903e-05	197	681	182	91	343	285	68	80	172	122	179	140	192	93	168	60	128	249	52	55	99	30	81	100	85.572	94.94	94.636	79.207	87.629	78.822	85.335	69.65	83.261	65.066	72.715	76.016	88.578	122.008	113.549	81.853
B9J08_000494	PHO91	PHO91	0	0.0278185	0.783461	0.745198	0.0051319	5.18708	0.000297902	78	239	76	41	135	120	40	43	72	74	119	66	59	18	44	18	37	59	55	53	65	43	57	62	33.881	33.32	39.518	35.687	34.489	33.188	50.197	37.437	34.853	39.466	48.341	35.836	27.219	23.614	29.739	24.556
B9J08_001459	NA	NA	0	-0.541463	0.0138489	0.863983	0.00813239	3.2307	0.000585636	18	82	16	8	40	34	8	14	24	16	22	22	16	6	14	6	8	9	13	7	10	10	22	21	7.819	11.432	8.32	6.963	10.219	9.403	10.039	12.189	11.618	8.533	8.937	11.945	7.382	7.871	9.462	8.185
B9J08_003887	NA	NA	0	-0.0823242	0.511585	0.863084	0.00707003	6.66896	0.000473874	207	802	183	132	418	382	71	142	218	238	291	202	164	61	126	48	107	153	114	156	152	73	201	273	89.915	111.809	95.156	114.894	106.789	105.65	89.1	123.629	105.528	126.931	118.212	109.681	75.66	80.027	85.162	65.482
B9J08_001617	NA	NA	0	0.643737	-0.399593	-0.472213	0.000626742	4.50811	1.98593e-05	84	222	60	31	125	109	21	24	60	46	66	53	44	15	28	19	34	75	21	10	24	8	21	21	36.487	30.95	31.199	26.983	31.935	30.146	26.353	20.895	29.044	24.533	26.811	28.778	20.299	19.679	18.925	25.92
B9J08_005329	YIM1	YIM1	0	-0.0356172	0.7794	0.69761	5.33119e-06	7.06101	4.99832381463465e-8	288	988	260	159	533	508	150	164	300	251	350	279	225	79	143	76	103	226	233	161	243	119	195	268	125.1	137.74	135.195	138.394	136.169	140.497	188.239	142.783	145.222	133.864	142.18	151.489	103.802	103.641	96.652	103.681
B9J08_002438	NA	PBA1	0	0.437261	-0.0798805	-0.306713	0.000626742	7.06043	1.99588e-05	370	1135	328	186	687	622	130	198	401	280	396	310	259	81	153	106	163	348	137	79	175	71	108	133	160.718	158.234	170.553	161.895	175.513	172.026	163.141	172.385	194.114	149.331	160.866	168.322	119.488	106.265	103.411	144.607
B9J08_002039	NA	POF1	0	0.113844	0.77823	0.756164	6.86614e-05	6.71135	1.13682e-06	273	904	212	118	438	427	81	136	258	259	311	207	170	50	109	60	81	188	176	128	157	78	165	203	118.584	126.029	110.236	102.708	111.899	118.095	101.649	118.406	124.891	138.131	126.337	112.395	78.428	65.596	73.672	81.853
B9J08_002829	DBF2	DBF2	0	0.308612	-0.506127	-0.603184	0.000628558	6.50934	2.03125e-05	163	401	105	84	275	216	59	71	106	121	151	91	402	98	249	132	231	471	146	96	178	74	136	165	70.803	55.905	54.598	73.114	70.256	59.739	74.041	61.815	51.312	64.532	61.34	49.411	185.46	128.567	168.296	180.077
B9J08_003912	SAP9	YPS1	0	-0.545804	-0.662975	-1.30975	0.000628687	7.50137	2.0442e-05	393	975	232	203	441	509	159	161	287	226	271	210	881	254	623	185	280	644	248	254	398	94	220	246	170.709	135.928	120.635	176.692	112.665	140.774	199.533	140.171	138.929	120.531	110.088	114.024	406.444	333.225	421.078	252.38
B9J08_001079	WSC2	WSC2	0	-0.206516	-0.760117	-1.31085	0.000662174	5.44058	2.1663e-05	76	375	116	51	182	165	34	55	96	107	114	75	126	44	101	46	52	120	48	33	51	23	28	36	33.012	52.28	60.318	44.391	46.497	45.634	42.668	47.885	46.471	57.066	46.31	40.723	58.129	57.724	68.265	62.754
B9J08_002836	MNR2	MNR2	0	-0.341259	0.460066	0.491766	0.000664417	6.44534	2.18689e-05	196	672	156	101	326	306	72	91	156	174	220	185	179	61	118	58	62	141	165	91	157	104	122	173	85.137	93.686	81.117	87.911	83.285	84.63	90.355	79.227	75.516	92.798	89.37	100.45	82.581	80.027	79.755	79.125
B9J08_000361	NA	NA	0	-0.220681	-1.19686	-2.60387	0.000673185	4.75511	2.23688e-05	85	163	54	37	70	65	17	24	34	29	40	21	181	39	123	44	66	155	20	49	65	8	14	20	36.922	22.724	28.079	32.205	17.883	17.977	21.334	20.895	16.459	15.466	16.249	11.402	83.503	51.165	83.134	60.026
B9J08_000759	orf19.2149	YPR003C	0	-0.107277	-0.522417	-1.35692	0.000673185	5.19295	2.24261e-05	52	161	48	37	84	80	16	24	50	46	44	22	193	58	141	78	97	148	85	60	78	34	48	40	22.587	22.446	24.959	32.205	21.46	22.126	20.079	20.895	24.204	24.533	17.874	11.945	89.039	76.091	95.3	106.409
B9J08_002451	CDR4	PDR5	0	0.204022	0.773777	1.33055	0.000165382	7.14005	3.29907e-06	355	855	228	177	477	561	131	154	269	255	379	211	220	82	141	88	132	250	217	209	201	147	297	515	154.203	119.198	118.555	154.062	121.862	155.156	164.395	134.077	130.216	135.998	153.96	114.567	101.496	107.577	95.3	120.051
B9J08_004132	NMD5	NMD5	0	-0.342125	0.37127	0.367042	0.000680044	6.2447	2.28984e-05	151	600	131	90	282	271	62	84	153	127	193	146	144	62	118	47	60	133	128	84	142	74	117	146	65.59	83.648	68.117	78.336	72.044	74.95	77.805	73.133	74.063	67.732	78.402	79.274	66.434	81.338	79.755	64.118
B9J08_001124	SAL6	PPQ1	0	-0.331866	0.556744	0.453782	0.000688196	6.95575	2.3338e-05	273	802	196	133	410	374	79	94	210	216	249	185	285	117	186	97	112	221	271	168	298	168	242	228	118.584	111.809	101.916	115.764	104.745	103.437	99.139	81.839	101.656	115.198	101.151	100.45	131.483	153.494	125.715	132.329
B9J08_004902	NA	RGD2	0	0.185582	-1.04421	-1.10107	0.000717519	4.44753	2.44755e-05	43	99	36	27	68	62	18	23	30	36	40	30	103	20	55	37	46	97	31	16	22	10	29	25	18.678	13.802	18.719	23.501	17.372	17.147	22.589	20.024	14.522	19.2	16.249	16.289	47.518	26.238	37.174	50.476
B9J08_000283	NA	NA	0	-0.0286897	0.767111	0.893439	8.29853e-06	7.48711	8.11147129777408e-8	380	1278	349	184	672	632	127	236	366	340	460	345	300	128	188	110	145	312	355	192	357	222	324	363	165.062	178.17	181.473	160.155	171.68	174.792	159.376	205.468	177.171	181.33	186.865	187.326	138.403	167.925	127.067	150.064
B9J08_002843	NA	NA	0	0.139201	-0.918187	-1.04421	0.000758053	6.13909	2.61606e-05	130	360	103	91	199	201	62	60	97	88	157	72	255	98	212	110	144	333	65	65	129	38	73	114	56.469	50.189	53.558	79.207	50.84	55.591	77.805	52.238	46.955	46.933	63.778	39.094	117.643	128.567	143.288	150.064
B9J08_000831	NA	KHA1	0	0.0483269	-0.576895	-1.1342	0.000810289	6.59574	2.81249e-05	179	466	121	112	223	229	51	71	100	126	158	99	432	157	285	176	223	414	206	115	172	100	103	115	77.753	64.967	62.918	97.485	56.971	63.334	64.001	61.815	48.407	67.199	64.184	53.754	199.301	205.97	192.628	240.102
B9J08_004605	CDC11	CDC11	0	-0.114438	-0.709918	-0.781589	0.000841287	7.10194	2.93687e-05	362	1320	399	169	809	644	126	184	385	308	402	328	362	140	167	84	171	324	123	88	123	59	112	137	157.243	184.025	207.472	147.099	206.681	178.111	158.121	160.196	186.368	164.264	163.303	178.095	167.007	183.667	112.873	114.594
B9J08_000512	NA	YBR096W	0	-0.217334	-0.21131	-0.71988	0.000876763	8.78099	3.0782e-05	812	3124	837	383	1526	1468	236	451	918	721	890	747	1476	461	946	368	677	1227	732	500	805	301	483	570	352.711	435.527	435.223	333.365	389.858	406.004	296.163	392.654	444.38	384.527	361.542	405.601	680.944	604.791	639.39	502.032
B9J08_002840	MSN4	MSN2	0	-0.152804	0.76429	0.905254	0.00453894	7.3154	0.000255333	481	1226	269	256	581	561	168	238	348	382	456	287	194	104	180	91	102	211	331	160	222	192	271	255	208.934	170.921	139.875	222.824	148.432	155.156	210.828	207.21	168.458	203.73	185.24	155.833	89.501	136.439	121.66	124.144
B9J08_000593	NA	BEM1	0	0.0908334	-1.12158	-2.08108	0.000926629	3.782	3.29025e-05	34	102	31	28	47	44	11	12	24	23	32	21	53	19	38	13	37	61	8	13	24	2	7	12	14.769	14.22	16.119	24.371	12.007	12.169	13.804	10.448	11.618	12.266	12.999	11.402	24.451	24.926	25.684	17.735
B9J08_001677	STV1	STV1	0	0.163654	0.581338	0.828576	0.000110771	6.46241	2.01081e-06	210	728	203	99	372	330	72	115	224	153	213	175	146	41	105	61	78	157	134	88	136	93	130	185	91.218	101.493	105.556	86.17	95.037	91.268	90.355	100.122	108.433	81.599	86.526	95.02	67.356	53.788	70.968	83.217
B9J08_004933	VMA11	VMA11	0	-0.224747	0.503664	0.452982	0.000975794	7.55156	3.50375e-05	406	1266	295	185	591	596	136	181	327	322	415	285	373	172	296	123	177	398	404	244	382	245	310	368	176.356	176.497	153.394	161.025	150.987	164.836	170.67	157.584	158.292	171.73	168.584	154.747	172.081	225.649	200.063	167.799
B9J08_001969	NA	NA	0	0.0459984	0.391172	0.825836	0.00753011	6.69001	0.000521569	268	1057	280	215	733	531	89	149	293	302	327	220	125	63	80	53	72	130	113	83	98	90	112	184	116.412	147.36	145.594	187.137	187.264	146.859	111.689	129.724	141.834	161.064	132.836	119.454	57.668	82.65	54.071	72.304
B9J08_002882	TFS1	TFS1	0	0.151785	0.584766	0.822806	5.94269e-05	7.92082	9.60218551212034e-7	549	1750	452	313	1032	861	248	315	513	531	637	473	385	141	262	152	216	444	389	243	359	243	355	524	238.471	243.973	235.031	272.437	263.652	238.127	311.222	274.248	248.33	283.195	258.767	256.826	177.617	184.979	177.083	207.361
B9J08_005226	GLK1	GLK1	0	0.119877	0.751078	1.1147	0.000559001	10.8708	1.72841e-05	5903	15797	4244	3454	8870	8876	2159	2796	4372	5348	6733	3883	2022	845	1689	794	1316	2643	1979	2133	2312	1232	2987	4588	2564.11	2202.31	2206.79	3006.38	2266.08	2454.83	2709.39	2434.28	2116.37	2852.22	2735.13	2108.36	932.838	1108.57	1141.57	1083.19
B9J08_002333	orf19.2252	NA	0	-0.659134	-1.44573	-2.83759	0.000994561	2.85942	3.65049e-05	4	20	6	1	7	6	6	3	1	4	1	6	153	59	55	41	33	77	29	23	25	13	8	9	1.737	2.788	3.12	0.87	1.788	1.659	7.53	2.612	0.484	2.133	0.406	3.258	70.586	77.403	37.174	55.933
B9J08_000031	NAP1	NAP1	0	0.0698043	-0.676125	-0.896244	0.00100058	7.2611	3.69256e-05	439	1592	456	243	1177	762	136	215	420	367	451	372	475	89	201	94	198	404	124	101	128	51	105	142	190.69	221.946	237.111	211.508	300.696	210.746	170.67	187.185	203.311	195.73	183.209	201.986	219.138	116.76	135.853	128.236
B9J08_003642	NA	YET3	0	-0.0949086	0.739919	0.611067	0.00121015	8.24908	4.68319e-05	636	1580	425	274	831	762	255	304	459	431	543	358	680	283	465	263	323	647	887	433	766	414	631	700	276.261	220.273	220.991	238.491	212.301	210.746	320.006	264.671	222.19	229.863	220.582	194.384	313.714	371.271	314.288	358.789
B9J08_000437	NA	UBC13	0	-0.124447	0.73498	0.721579	0.000939407	5.6486	3.35435e-05	124	395	107	70	192	187	36	64	102	106	138	85	81	33	57	20	43	85	105	54	82	60	78	88	53.862	55.068	55.638	60.928	49.052	51.719	45.177	55.72	49.376	56.532	56.059	46.153	37.369	43.293	38.526	27.284
B9J08_001366	PGA6	CCW12	0	0.0636165	-1.311	-1.37729	0.00106749	9.35247	4.00337e-05	1456	4250	1146	853	2009	2077	636	691	1111	1076	1272	921	2541	774	2077	585	1713	3470	386	656	751	193	685	999	632.448	592.506	595.897	742.456	513.253	574.435	798.134	601.605	537.806	573.857	516.721	500.078	1172.28	1015.42	1403.82	798.067
B9J08_001031	RBP1	FPR1	0	-0.221707	0.733688	0.713485	0.00049165	10.5851	1.39098e-05	2939	10019	2296	1287	5283	5047	944	1601	2852	2707	3002	2860	3044	1308	2109	1096	1305	2764	4551	1977	3052	2312	2923	3140	1276.62	1396.78	1193.87	1120.21	1349.68	1395.85	1184.65	1393.88	1380.58	1443.71	1219.49	1552.9	1404.33	1715.98	1425.45	1495.18
B9J08_005077	CHS2	CHS1	0	-0.22008	-0.62925	-1.11444	0.00113132	6.23343	4.28789e-05	153	660	146	99	360	283	43	87	209	118	187	152	236	74	170	67	107	202	81	58	120	27	74	77	66.459	92.013	75.917	86.17	91.972	78.269	53.962	75.745	101.171	62.932	75.965	82.532	108.877	97.081	114.901	91.403
B9J08_004015	GCA1	ROT2	0	-0.269455	0.571928	0.809929	0.00052197	6.72538	1.55633e-05	343	857	217	199	504	453	97	155	284	268	353	176	151	59	112	38	68	148	144	98	160	94	171	189	148.99	119.477	112.836	173.211	128.76	125.286	121.728	134.947	137.477	142.931	143.398	95.563	69.663	77.403	75.699	51.84
B9J08_003435	PRE10	PRE10	0	-0.00800363	-0.719906	-0.753311	0.00120506	8.29114	4.63475e-05	924	3222	905	534	2205	1645	289	460	951	739	1042	812	717	250	379	147	457	724	240	175	256	117	249	274	401.361	449.189	470.582	464.796	563.326	454.957	362.674	400.489	460.354	394.127	423.289	440.894	330.784	327.978	256.161	200.54
B9J08_003516	NA	DIF1	0	-0.180172	0.733058	0.739469	0.00145969	7.59077	5.96921e-05	402	1196	322	202	658	640	126	192	360	295	422	253	360	167	264	149	172	323	540	253	369	309	382	357	174.618	166.738	167.433	175.822	168.104	177.005	158.121	167.161	174.267	157.331	171.428	137.372	166.084	219.089	178.434	203.268
B9J08_000850	NA	AIF1	0	0.235983	0.732512	0.96393	0.000680044	7.88257	2.29259e-05	585	1602	399	291	824	817	242	292	491	522	677	395	370	127	256	162	232	399	420	212	440	282	414	445	254.108	223.34	207.472	253.288	210.513	225.958	303.692	254.224	237.68	278.395	275.016	214.474	170.697	166.613	173.027	221.003
B9J08_000029	PCL5	PCL5	0	-0.232832	0.580077	0.797364	0.00242871	7.15448	0.000112884	443	1162	320	200	637	603	237	232	329	361	504	265	204	81	128	69	80	178	195	152	167	112	208	263	192.427	161.998	166.394	174.081	162.739	166.772	297.418	201.986	159.26	192.53	204.739	143.888	94.114	106.265	86.514	94.131
B9J08_004452	SNQ2	SNQ2	0	-0.0637541	-0.876255	-1.41896	0.00121684	7.48371	4.75766e-05	742	1401	351	343	794	731	231	226	363	472	583	290	503	169	331	141	262	493	201	115	140	81	100	114	322.305	195.318	182.513	298.549	202.849	202.173	289.888	196.762	175.719	251.729	236.831	157.462	232.056	221.713	223.719	192.355
B9J08_004089	RFG1	ROX1	0	0.0379278	-0.960543	-1.25956	0.00122369	7.63278	4.80882e-05	562	1002	274	296	553	505	139	148	212	323	396	202	985	268	548	320	429	857	253	194	285	101	255	230	244.118	139.692	142.474	257.64	141.279	139.668	174.435	128.853	102.624	172.264	160.866	109.681	454.424	351.592	370.386	436.55
B9J08_002443	NA	AGP1	0	0.393235	0.401021	0.796094	0.00927623	8.28467	0.000701315	682	2816	714	372	1717	1342	217	502	879	891	945	718	419	160	310	221	264	605	328	287	361	233	505	528	296.243	392.587	371.266	323.791	438.654	371.157	272.319	437.056	425.501	475.192	383.885	389.855	193.303	209.906	209.525	301.492
B9J08_000236	SIS1	SIS1	0	-0.131145	0.581048	0.519699	0.00124891	7.17616	4.9827e-05	334	1364	350	195	720	719	116	191	406	368	467	380	207	85	154	65	113	203	217	134	214	81	183	283	145.081	190.16	181.993	169.729	183.943	198.854	145.572	166.29	196.534	196.263	189.708	206.33	95.498	111.512	104.087	88.674
B9J08_000522	NA	DIA4	0	0.174647	0.281709	0.783003	0.00894417	5.81932	0.000665505	147	486	134	79	302	249	56	77	150	137	176	141	97	23	51	31	40	107	56	55	58	60	71	99	63.853	67.755	69.677	68.762	77.154	68.866	70.276	67.038	72.611	73.065	71.496	76.559	44.75	30.174	34.47	42.291
B9J08_000945	2007-09-01	SHS1	0	-0.0339161	-0.533702	-0.598578	0.00137221	6.38527	5.52934e-05	174	627	190	82	375	314	59	104	210	157	189	150	226	80	155	70	112	242	93	64	108	55	76	113	75.581	87.412	98.796	71.373	95.804	86.843	74.041	90.545	101.656	83.732	76.777	81.446	104.264	104.953	104.763	95.495
B9J08_003931	NA	NA	0	-0.430331	-0.630824	-0.97335	0.00140689	5.74976	5.69718e-05	86	367	106	46	222	182	52	52	112	88	112	96	190	57	141	45	75	143	65	52	89	28	58	70	37.356	51.165	55.118	40.039	56.716	50.336	65.256	45.273	54.216	46.933	45.497	52.125	87.655	74.779	95.3	61.39
B9J08_005545	RBT5	NA	0	0.403573	0.731375	1.75097	0.000201989	11.4742	4.31135e-06	9055	15593	5409	4680	11754	10235	3139	2764	4006	4425	7244	4048	4323	1437	2411	2332	2300	4806	4064	2844	4209	3667	8518	10512	3933.25	2173.87	2812.57	4073.5	3002.87	2830.69	3939.22	2406.42	1939.2	2359.96	2942.71	2197.95	1994.39	1885.22	1629.57	3181.36
B9J08_001404	NA	YPL109C	0	-0.0844518	0.724286	1.01973	1.19668e-05	6.20292	1.28792245034614e-7	168	442	141	93	238	240	72	78	156	121	169	121	128	48	87	37	66	129	139	96	127	92	166	168	72.975	61.621	73.317	80.948	60.803	66.377	90.355	67.909	75.516	64.532	68.652	65.7	59.052	62.972	58.802	50.476
B9J08_001659	NA	NA	0	-0.241694	0.551061	0.758997	0.00113663	7.68503	4.33065e-05	676	1738	430	342	1009	912	244	289	479	591	690	353	314	115	190	101	121	259	284	218	247	163	299	386	293.636	242.3	223.591	297.679	257.776	252.232	306.202	251.612	231.871	315.195	280.297	191.669	144.862	150.87	128.419	137.786
B9J08_005356	SET1	SET1	0	0.30983	-1.02846	-0.818967	0.00153817	4.64967	6.3515e-05	57	253	60	31	127	95	33	25	56	65	63	36	64	28	38	25	37	89	17	15	20	13	21	24	24.759	35.272	31.199	26.983	32.446	26.274	41.413	21.766	27.108	34.666	25.592	19.547	29.526	36.733	25.684	34.105
B9J08_004567	NA	KSH1	0	-0.0924225	0.722918	0.738403	1.19668e-05	6.50741	1.28905872137649e-7	182	600	156	87	332	315	64	94	189	163	186	152	155	67	133	57	92	160	195	131	167	102	158	221	79.056	83.648	81.117	75.725	84.818	87.119	80.315	81.839	91.49	86.932	75.558	82.532	71.508	87.898	89.893	77.76
B9J08_002751	NA	NA	0	0.220822	-0.544586	-0.660968	0.00159286	6.79438	6.64816e-05	355	1509	437	186	805	681	108	233	427	334	435	379	180	56	128	62	119	210	65	61	79	36	66	80	154.203	210.374	227.231	161.895	205.659	188.344	135.532	202.857	206.7	178.13	176.709	205.787	83.042	73.467	86.514	84.581
B9J08_002666	AGP2	AGP2	0	-0.513968	0.715669	0.811832	0.000286698	6.01249	7.09168e-06	111	322	71	44	148	107	53	41	73	97	127	61	151	83	143	42	58	158	197	138	190	88	202	273	48.215	44.891	36.919	38.298	37.811	29.593	66.511	35.696	35.337	51.732	51.591	33.121	69.663	108.889	96.652	57.297
B9J08_004004	NA	TED1	0	-0.0027521	-0.511768	-0.665882	0.00159351	6.30933	6.73898e-05	183	707	178	81	314	317	66	94	209	139	198	162	219	59	152	77	99	210	76	70	98	41	81	89	79.49	98.565	92.556	70.503	80.22	87.673	82.825	81.839	101.171	74.132	80.433	87.962	101.034	77.403	102.735	105.045
B9J08_003183	COX8	COX8	0	-0.1143	0.43378	0.530041	0.00166253	9.90594	7.09718e-05	2170	5983	1610	1134	3056	3227	774	925	1783	1875	2288	1586	1902	658	1581	608	932	2055	1513	1190	1926	945	1814	1998	942.59	834.109	837.167	987.04	780.737	892.491	971.314	805.332	863.104	999.983	929.448	861.155	877.476	863.237	1068.58	829.444
B9J08_001449	HMS1	HMS1	0	0.315643	0.711992	1.37319	0.000626742	6.88382	1.96073e-05	330	1112	292	255	649	621	161	199	394	374	454	299	118	50	71	46	80	151	96	114	118	64	208	267	143.343	155.027	151.834	221.953	165.804	171.75	202.043	173.255	190.725	199.463	184.427	162.349	54.439	65.596	47.988	62.754
B9J08_001210	NA	YDR090C	0	-0.161964	-0.463701	-0.696519	0.00178154	6.85811	7.67628e-05	325	1079	317	174	641	566	97	169	290	247	361	260	282	85	180	61	123	287	121	83	119	50	92	125	141.171	150.427	164.834	151.451	163.761	156.538	121.728	147.136	140.381	131.731	146.648	141.173	130.099	111.512	121.66	83.217
B9J08_002353	orf19.1730	NA	0	0.114835	-0.586655	-0.919281	0.00183646	6.15746	7.94958e-05	131	428	116	80	329	236	59	87	143	127	139	78	264	79	126	102	124	216	91	62	98	57	52	86	56.903	59.669	60.318	69.632	84.052	65.27	74.041	75.745	69.223	67.732	56.466	42.352	121.795	103.641	85.162	139.15
B9J08_001896	NA	SRF1	0	-0.120257	0.705124	0.706577	0.000162228	7.72698	3.20378e-06	499	1327	359	264	698	689	192	265	452	333	563	349	365	151	269	140	187	334	431	263	397	243	367	413	216.752	185.001	186.673	229.787	178.323	190.557	240.946	230.717	218.801	177.597	228.706	189.498	168.391	198.099	181.814	190.99
B9J08_002958	orf19.6874	NA	0	0.146659	0.528266	0.744238	0.000143222	6.49389	2.74273e-06	230	725	176	115	418	367	79	103	222	180	239	167	149	50	97	55	83	164	118	107	127	76	145	177	99.906	101.075	91.516	100.097	106.789	101.501	99.139	89.675	107.464	95.998	97.088	90.677	68.74	65.596	65.561	75.032
B9J08_002011	NA	FMO1	0	-0.0176872	-0.247738	-0.832324	0.0019599	6.09759	8.6403e-05	187	659	183	95	359	290	67	95	192	126	199	143	148	57	107	38	86	173	66	59	96	23	52	67	81.228	91.873	95.156	82.689	91.716	80.205	84.08	82.71	92.942	67.199	80.839	77.645	68.279	74.779	72.32	51.84
B9J08_002830	AYR2	AYR1	0	0.313507	-0.551158	-1.1091	0.0019599	8.4771	8.60519e-05	709	2966	751	328	1538	1384	159	437	882	618	884	752	1120	336	698	569	589	1132	575	262	393	253	233	269	307.971	413.499	390.505	285.493	392.923	382.773	199.533	380.465	426.953	329.595	359.105	408.316	516.705	440.802	471.77	776.24
B9J08_000447	CRZ2	CRZ1	0	-0.00578799	-1.06316	-0.936974	0.00198124	6.50905	8.7739e-05	253	716	192	162	395	323	89	112	165	185	266	156	276	88	185	54	149	361	72	59	84	40	70	123	109.896	99.82	99.836	141.006	100.913	89.332	111.689	97.51	79.872	98.665	108.057	84.704	127.331	115.448	125.039	73.668
B9J08_004892	HYR3	FLO5	0	1.71904	0.704077	-0.0601846	0.00708245	6.33873	0.000476119	189	812	210	103	515	450	105	359	679	229	244	240	67	34	43	180	89	178	71	44	81	23	48	40	82.097	113.203	109.196	89.652	131.571	124.456	131.767	312.556	328.686	122.131	99.12	130.314	30.91	44.605	29.063	245.559
B9J08_004580	NA	YPL199C	0	-0.0283252	-1.09224	-0.720168	0.0021107	5.45529	9.47352e-05	97	272	97	40	157	182	22	45	93	64	111	92	137	43	123	39	71	172	33	34	50	29	45	72	42.134	37.92	50.438	34.816	40.11	50.336	27.608	39.178	45.019	34.133	45.091	49.954	63.204	56.412	83.134	53.204
B9J08_000905	NA	REG1	0	0.547917	-1.35227	-1.6806	0.00214821	6.42999	9.68472e-05	271	562	121	190	279	341	115	96	98	277	235	84	320	102	187	146	199	493	69	46	80	18	84	58	117.715	78.35	62.918	165.377	71.278	94.31	144.317	83.58	47.439	147.731	95.463	45.61	147.63	133.815	126.391	199.176
B9J08_002547	NA	MGR3	0	0.28578	-0.335611	-0.595659	0.00227545	6.45937	0.000103945	219	677	199	120	395	355	84	102	210	149	233	151	246	65	124	74	136	272	102	92	83	37	87	100	95.128	94.383	103.476	104.449	100.913	98.182	105.414	88.804	101.656	79.465	94.651	81.989	113.491	85.274	83.81	100.952
B9J08_001544	NA	PER1	0	0.0459918	0.700167	0.81386	0.000143222	8.23442	2.73459e-06	708	1880	480	313	1075	928	225	330	640	587	734	526	509	188	422	250	252	538	544	400	567	295	555	770	307.536	262.097	249.59	272.437	274.638	256.657	282.359	287.308	309.807	313.061	298.171	285.604	234.824	246.639	285.225	341.054
B9J08_002001	GTT11	GTT1	0	-0.282166	0.536891	0.307052	0.0022948	7.79297	0.000105287	583	2005	471	234	1036	1037	131	278	484	522	609	514	375	165	269	133	155	337	415	242	352	184	298	327	253.24	279.523	244.91	203.675	264.674	286.803	164.395	242.035	234.292	278.395	247.393	279.088	173.004	216.465	181.814	181.441
B9J08_003957	MEA1	AFI1	0	-0.188683	-0.840421	-1.41414	0.00230036	4.112	0.000106001	33	93	22	9	57	57	17	18	30	21	43	26	84	23	46	23	28	73	20	19	31	6	14	26	14.334	12.965	11.44	7.834	14.562	15.764	21.334	15.671	14.522	11.2	17.468	14.117	38.753	30.174	31.091	31.377
B9J08_000244	orf19.577	YDL057W	0	-0.130708	-0.703286	-1.33632	0.00234423	4.98802	0.00010849	55	261	72	32	129	127	16	26	83	72	77	68	103	35	72	36	46	95	39	39	31	13	28	25	23.891	36.387	37.439	27.853	32.957	35.124	20.079	22.636	40.178	38.399	31.28	36.922	47.518	45.917	48.664	49.112
B9J08_001291	NA	TGL1	0	-0.131653	0.698079	0.761996	0.00170026	6.62062	7.29214e-05	221	600	153	132	329	344	84	131	194	167	232	161	164	73	127	69	72	173	240	106	169	117	189	189	95.997	83.648	79.557	114.894	84.052	95.14	105.414	114.052	93.91	89.065	94.245	87.419	75.66	95.769	85.838	94.131
B9J08_003429	RRS1	RRS1	0	-0.0941389	-0.765631	-0.560216	0.00246543	5.69495	0.000115083	145	479	108	68	226	219	47	62	101	103	145	103	140	46	87	38	55	151	47	32	53	38	47	62	62.984	66.779	56.158	59.188	57.738	60.569	58.982	53.979	48.891	54.932	58.903	55.926	64.588	60.348	58.802	51.84
B9J08_001465	DPP1	DPP1	0	-0.227633	-1.25032	-1.10896	0.00250493	4.73756	0.000117926	59	213	64	16	131	93	22	31	55	45	45	54	103	30	69	21	38	106	20	23	27	16	22	36	25.628	29.695	33.279	13.926	33.467	25.721	27.608	26.989	26.624	24	18.28	29.321	47.518	39.357	46.636	28.649
B9J08_001090	TRR1	TRR1	0	-0.278621	0.11243	0.736076	0.00493903	8.923	0.000282765	1401	5932	1543	548	3240	2718	410	926	1749	1265	1765	1512	662	245	464	162	331	579	376	368	488	293	717	945	608.557	826.999	802.329	476.982	827.745	751.717	514.52	806.202	846.645	674.656	716.991	820.975	305.41	321.418	313.612	221.003
B9J08_002991	NA	YML079W	0	-0.340399	-0.542884	-1.05503	0.00254454	6.96479	0.000121188	236	1028	312	123	527	535	94	124	343	193	271	287	417	114	283	91	158	343	163	105	183	64	119	118	102.512	143.317	162.234	107.06	134.636	147.965	117.963	107.958	166.037	102.932	110.088	155.833	192.38	149.558	191.276	124.144
B9J08_005283	NA	YOP1	0	0.0960871	0.69781	0.58322	0.00284335	9.94149	0.000137828	1547	4030	1160	830	2185	2080	548	760	1224	1166	1507	1116	2738	921	2033	1196	1339	2916	3203	1682	2886	1541	2249	2854	671.976	561.835	603.176	722.436	558.217	575.265	687.7	661.678	592.507	621.856	612.185	605.958	1263.16	1208.27	1374.08	1631.6
B9J08_000239	SFT2	SFT2	0	0.0175228	0.696131	0.81018	0.00285311	6.8326	0.000138871	247	718	185	113	351	362	61	99	188	187	221	190	226	92	154	99	116	223	308	144	210	192	229	231	107.29	100.099	96.196	98.356	89.672	100.118	76.551	86.192	91.006	99.732	89.776	103.165	104.264	120.696	104.087	135.058
B9J08_002122	PNC1	PNC1	0	-0.09543	0.539104	0.732954	0.000984572	8.12931	3.59419e-05	603	2453	615	394	1140	1224	255	402	593	720	836	601	363	186	322	129	227	439	436	285	373	205	433	627	261.927	341.98	319.788	342.94	291.244	338.521	320.006	349.993	287.056	383.994	339.606	326.327	167.468	244.015	217.636	175.984
B9J08_002241	SIT1	ARN1	0	0.132508	0.695683	2.04526	0.00551257	5.41442	0.000328244	167	232	54	77	125	107	45	36	48	71	67	58	81	17	41	35	50	54	91	37	60	158	131	157	72.54	32.344	28.079	67.021	31.935	29.593	56.472	31.343	23.236	37.866	27.217	31.492	37.369	22.302	27.711	47.748
B9J08_001407	NA	ERD2	0	-0.132463	0.526083	0.726774	0.000178542	5.27037	3.71824e-06	79	261	86	39	141	130	23	40	66	65	93	78	73	28	52	25	37	67	61	47	76	46	69	88	34.315	36.387	44.718	33.946	36.022	35.954	28.863	34.825	31.949	34.666	37.779	42.352	33.678	36.733	35.146	34.105
B9J08_003286	orf19.7042	NA	0	0.405238	-0.536919	-1.02091	0.00286706	6.02972	0.000140122	160	410	152	88	219	212	58	71	142	107	144	119	186	54	126	118	95	227	106	43	65	51	52	44	69.5	57.159	79.037	76.596	55.949	58.633	72.786	61.815	68.739	57.066	58.497	64.614	85.81	70.843	85.162	160.978
B9J08_003885	MIT1	SUR1	0	-0.200358	0.463327	0.72472	0.00132	6.08789	5.29264e-05	200	693	162	117	399	390	57	107	183	186	233	174	77	47	64	27	41	84	83	59	74	46	79	130	86.875	96.613	84.237	101.837	101.935	107.862	71.531	93.157	88.586	99.198	94.651	94.477	35.523	61.66	43.257	36.834
B9J08_001267	NA	CRD1	0	-0.158215	0.519089	0.58296	0.00300413	5.3221	0.000148019	79	276	82	40	162	140	27	39	87	76	95	78	64	34	63	18	42	75	70	45	77	35	71	88	34.315	38.478	42.638	34.816	41.387	38.72	33.883	33.955	42.114	40.533	38.592	42.352	29.526	44.605	42.581	24.556
B9J08_003695	RPS27	RPS27B	0	0.0346502	0.683741	0.734655	0.000557924	7.13398	1.71395e-05	307	915	233	115	482	480	93	152	270	245	269	262	228	100	227	105	146	273	305	160	303	159	256	332	133.353	127.563	121.155	100.097	123.14	132.753	116.708	132.336	130.7	130.665	109.275	142.259	105.186	131.191	153.426	143.243
B9J08_004499	TUB1	TUB1	0	0.0599478	-0.451594	-0.706962	0.00313982	8.71997	0.00015721	870	2505	668	448	1418	1255	302	360	742	625	810	576	1521	418	1018	466	727	1618	479	432	870	228	538	694	377.905	349.23	347.346	389.942	362.266	347.095	378.988	313.426	359.183	333.328	329.044	312.752	701.704	548.379	688.054	635.725
B9J08_003110	NA	NA	0	-0.0988169	0.683283	0.701054	0.00052197	7.71289	1.52443e-05	430	1762	447	219	837	770	134	315	442	421	542	468	378	129	236	143	161	317	297	267	428	188	382	395	186.781	245.646	232.431	190.619	213.834	212.959	168.16	274.248	213.961	224.53	220.175	254.111	174.388	169.236	159.509	195.083
B9J08_001143	HEM15	HEM15	0	-0.375916	-0.0892687	-0.621339	0.00315753	8.76147	0.000158727	978	3361	886	476	1775	1727	324	513	908	690	911	804	1179	379	923	264	502	1058	587	506	820	234	503	551	424.817	468.568	460.702	414.313	453.471	477.636	406.596	446.633	439.539	367.994	370.073	436.55	543.925	497.214	623.844	360.153
B9J08_002749	UBC4	UBC4	0	-0.20601	0.454285	0.536816	0.00334222	9.94927	0.000169813	2357	10034	2641	1010	5307	4756	669	1492	2829	2345	3443	2700	1497	569	1093	435	685	1514	1423	863	1383	817	1282	1559	1023.82	1398.87	1373.27	879.109	1355.82	1315.37	839.546	1298.98	1369.44	1250.65	1398.64	1466.03	690.632	746.477	738.745	593.435
B9J08_002194	NA	NYV1	0	-0.457628	0.677462	0.3498	0.00551257	4.90139	0.000329353	75	180	45	17	97	73	37	32	59	46	59	55	70	25	47	18	18	63	81	39	72	33	47	65	32.578	25.094	23.399	14.797	24.781	20.19	46.432	27.86	28.56	24.533	23.967	29.864	32.294	32.798	31.767	24.556
B9J08_002969	YPT52	YPT52	0	0.170627	-0.325885	-0.901178	0.0033995	7.55724	0.000173603	379	1123	338	216	641	641	161	156	371	257	409	180	572	242	377	214	372	690	256	215	339	145	131	252	164.628	156.561	175.753	188.008	163.761	177.281	202.043	135.818	179.591	137.064	166.147	97.735	263.889	317.482	254.81	291.943
B9J08_004197	PRS5	PRS5	0	0.107385	0.461203	0.716182	0.0082714	5.92485	0.000605546	108	385	108	50	196	195	59	57	120	124	128	106	133	36	82	43	80	121	114	79	90	66	122	136	46.912	53.674	56.158	43.52	50.073	53.931	74.041	49.626	58.089	66.132	51.997	57.555	61.359	47.229	55.423	58.661
B9J08_003426	SIN3	SIN3	0	-0.00232222	-0.327257	-0.843698	0.00353969	6.84817	0.000182174	322	848	239	183	476	408	107	141	229	240	280	167	328	91	211	97	154	321	148	90	172	65	89	117	139.868	118.222	124.275	159.284	121.607	112.84	134.277	122.759	110.853	127.998	113.744	90.677	151.321	119.384	142.612	132.329
B9J08_001820	NA	QCR10	0	-0.11621	0.461853	0.528224	0.0035504	11.066	0.000183526	4595	11794	3307	2228	6666	6446	1818	2205	3695	3412	5197	3007	4644	1585	3666	1453	2278	4774	3490	2914	4919	2088	4474	4975	1995.95	1644.24	1719.57	1939.26	1703.01	1782.77	2281.46	1919.74	1788.65	1819.7	2111.16	1632.72	2142.48	2079.38	2477.8	1982.21
B9J08_003721	NA	LSO2	0	0.323753	-0.439073	-0.212604	0.0035504	7.6158	0.000184142	570	1565	465	280	1106	799	148	280	410	376	539	332	474	149	241	156	309	513	184	123	212	137	195	241	247.593	218.182	241.791	243.713	282.557	220.979	185.729	243.776	198.47	200.53	218.957	180.267	218.677	195.475	162.889	212.818
B9J08_000626	NA	NA	0	0.0101378	-0.418067	-1.09803	0.00359468	4.85766	0.000189307	69	234	58	36	146	110	19	38	57	60	68	45	91	26	52	34	36	87	32	33	39	8	31	25	29.972	32.623	30.159	31.335	37.3	30.423	23.844	33.084	27.592	31.999	27.623	24.434	41.982	34.11	35.146	46.383
B9J08_003175	NA	BOP3	0	0.225741	-0.208159	-0.627806	0.00359468	5.56832	0.000189124	143	432	102	70	209	209	36	67	110	103	122	98	87	40	78	38	66	119	53	35	60	21	38	47	62.115	60.226	53.038	60.928	53.395	57.803	45.177	58.332	53.248	54.932	49.56	53.211	40.137	52.476	52.719	51.84
B9J08_003471	RAX2	RAX2	0	-0.0443315	-0.3622	-0.959245	0.00359468	5.43603	0.000188806	80	281	76	33	142	142	28	32	71	61	94	61	145	51	118	48	70	170	51	64	93	21	46	63	34.75	39.175	39.518	28.723	36.278	39.273	35.138	27.86	34.369	32.533	38.185	33.121	66.895	66.907	79.755	65.482
B9J08_000438	PGA30	NA	0	-1.07573	-1.03237	-1.18666	0.00372496	4.86006	0.000197654	64	133	26	30	77	61	22	27	31	48	36	48	138	67	114	27	37	78	51	34	46	24	42	47	27.8	18.542	13.519	26.112	19.672	16.871	27.608	23.507	15.006	25.6	14.624	26.063	63.665	87.898	77.051	36.834
B9J08_001935	MNN2	MNN2	0	0.246337	-0.224879	-0.744058	0.00372496	6.07911	0.000197456	164	530	221	81	297	258	47	83	157	105	175	136	178	57	95	71	93	191	91	52	89	30	68	58	71.237	73.889	114.916	70.503	75.877	71.355	58.982	72.262	76	55.999	71.09	73.844	82.119	74.779	64.209	96.859
B9J08_004900	orf19.5711	CSR1	0	-0.42613	-0.921607	-1.49352	0.00373381	7.14831	0.000199236	334	832	341	154	607	450	88	148	258	215	254	240	593	234	313	205	167	404	250	116	153	135	89	112	145.081	115.992	177.313	134.042	155.074	124.456	110.434	128.853	124.891	114.665	103.182	130.314	273.577	306.987	211.553	279.665
B9J08_004749	SSN6	CYC8	0	-0.043087	-0.345227	-0.809299	0.00375405	6.57829	0.000201444	239	868	227	105	541	423	92	119	259	207	300	186	220	87	145	72	120	215	89	86	124	33	69	112	103.815	121.011	118.035	91.393	138.213	116.989	115.453	103.605	125.375	110.398	121.868	100.993	101.496	114.136	98.004	98.224
B9J08_005044	YME1	YME1	0	-0.112503	-0.645724	-0.50064	0.00380852	9.08762	0.000205127	1562	5955	1650	973	3801	3213	664	977	1718	1443	2084	1411	1043	399	588	255	587	960	430	282	373	203	417	580	678.491	830.205	857.967	846.904	971.067	888.619	833.272	850.604	831.639	769.587	846.578	766.135	481.182	523.452	397.422	347.875
B9J08_003980	NA	EFM2	0	0.0745986	-0.915413	-1.05453	0.00432777	5.25406	0.000235683	65	318	82	50	196	131	28	37	112	48	62	52	129	31	109	33	96	130	33	31	51	19	32	49	28.234	44.333	42.638	43.52	50.073	36.231	35.138	32.213	54.216	25.6	25.186	28.235	59.513	40.669	73.672	45.019
B9J08_001125	SNQ2	SNQ2	0	0.110798	-0.452524	-0.846164	0.00433581	8.55603	0.000237851	956	3010	748	527	1604	1573	280	518	744	764	1072	655	897	328	746	246	635	1307	306	378	526	162	320	413	415.261	419.634	388.945	458.704	409.785	435.044	351.38	450.986	360.151	407.46	435.476	355.647	413.826	430.307	504.212	335.597
B9J08_004518	TRP99	AHP1	0	0.074007	0.67668	0.943473	3.64532e-05	8.15371	5.01749727329222e-7	557	1570	381	263	838	772	198	269	468	404	570	392	589	211	440	234	319	641	625	416	611	499	648	696	241.946	218.879	198.112	228.917	214.09	213.512	248.476	234.199	226.547	215.463	231.55	212.845	271.732	276.813	297.391	319.227
B9J08_000074	RTS1	RTS1	0	-0.16772	-0.375173	-0.658974	0.00444226	7.50942	0.000244577	424	1513	411	218	794	725	108	200	414	299	421	342	498	197	310	128	248	489	258	144	260	114	190	206	184.174	210.932	213.712	189.748	202.849	200.513	135.532	174.126	200.407	159.464	171.022	185.697	229.749	258.446	209.525	174.62
B9J08_004759	NA	ERV14	0	-0.0305408	0.672638	0.727131	0.000626742	8.70989	1.98471e-05	919	2230	692	398	1047	1051	339	394	694	631	819	563	877	350	634	299	478	950	974	588	974	650	807	970	399.189	310.891	359.826	346.421	267.484	290.675	425.42	343.028	335.947	336.528	332.7	305.694	404.599	459.169	428.513	407.901
B9J08_005418	RFC2	RFC2	0	0.0372533	-0.625882	-0.664292	0.0044832	6.30354	0.000249514	185	690	200	87	374	385	54	94	198	149	192	183	199	66	139	89	106	176	69	62	85	36	82	86	80.359	96.195	103.996	75.725	95.548	106.479	67.766	81.839	95.847	79.465	77.996	99.364	91.807	86.586	93.948	121.415
B9J08_002920	NA	GRX7	0	0.323148	-0.459464	-0.689219	0.00451794	5.85822	0.000252349	186	412	107	92	241	201	50	51	113	96	144	83	169	47	99	61	87	221	55	49	84	28	59	66	80.793	57.438	55.638	80.077	61.57	55.591	62.746	44.402	54.7	51.199	58.497	45.067	77.967	61.66	66.913	83.217
B9J08_003682	NA	YKL151C	0	-0.106272	0.668348	0.66098	0.0012407	6.59236	4.92519e-05	215	724	185	136	383	321	84	123	195	178	256	198	182	45	126	70	67	158	179	120	153	100	148	181	93.39	100.935	96.196	118.375	97.848	88.779	105.414	107.087	94.394	94.932	103.994	107.509	83.965	59.036	85.162	95.495
B9J08_003723	NA	NA	0	-0.185457	0.502722	0.434564	0.00453894	6.68971	0.000254736	247	706	200	121	388	366	97	128	212	174	275	190	189	87	123	64	81	187	187	104	193	113	148	170	107.29	98.426	103.996	105.319	99.125	101.225	121.728	111.44	102.624	92.798	111.713	103.165	87.194	114.136	83.134	87.31
B9J08_003337	NA	NA	0	-0.103735	0.505926	0.387946	0.00460388	8.35535	0.000259904	782	2337	616	395	1285	1247	229	397	608	591	870	600	635	246	417	211	307	604	681	349	555	329	512	498	339.68	325.809	320.307	343.81	328.288	344.883	287.378	345.64	294.317	315.195	353.418	325.784	292.953	322.73	281.845	287.85
B9J08_002767	PUP1	PUP1	0	0.224724	-0.238476	-0.370254	0.00473485	8.74756	0.000268242	1350	4325	1126	582	2481	2361	350	618	1272	993	1364	1070	857	258	530	324	460	940	426	258	461	236	330	405	586.404	602.962	585.497	506.576	633.838	652.981	439.225	538.049	615.742	529.591	554.094	580.981	395.372	338.473	358.22	442.006
B9J08_000463	NA	VFA1	0	0.260548	0.376466	0.708076	0.00849203	7.34847	0.000625087	450	1311	348	255	721	773	183	213	384	435	505	372	253	74	162	117	133	272	179	147	188	119	243	270	195.468	182.771	180.953	221.953	184.199	213.788	229.652	185.444	185.884	231.996	205.145	201.986	116.72	97.081	109.494	159.613
B9J08_000150	NA	SHH3	0	-0.00605046	0.665789	0.572528	0.00719906	9.88828	0.000485395	1859	5039	1262	957	2588	2516	814	840	1540	1613	2063	1239	1956	815	1502	788	1019	2198	2395	1389	2040	1319	1757	1949	807.5	702.503	656.214	832.978	661.174	695.85	1021.51	731.328	745.474	860.252	838.047	672.744	902.389	1069.21	1015.18	1075
B9J08_004505	NA	FAR8	0	-0.245537	-0.317765	-0.72918	0.00493903	6.14347	0.000281797	208	584	169	82	317	285	54	83	173	110	179	122	217	53	127	48	82	173	88	63	104	37	72	75	90.35	81.417	87.877	71.373	80.986	78.822	67.766	72.262	83.745	58.666	72.715	66.243	100.112	69.531	85.838	65.482
B9J08_001861	FAT1	FAT1	0	0.263427	-0.453783	-0.791282	0.00506411	5.76697	0.000290936	132	477	106	89	232	198	38	70	124	137	171	98	120	48	89	67	70	149	69	32	58	34	42	44	57.337	66.5	55.118	77.466	59.271	54.761	47.687	60.944	60.025	73.065	69.465	53.211	55.361	62.972	60.154	91.403
B9J08_001025	GSY1	GSY1	0	0.0462238	0.663187	0.925745	0.0030987	8.01773	0.000153297	802	2401	605	484	1489	1395	294	492	671	841	1012	548	264	118	231	120	165	300	313	255	251	151	334	538	348.367	334.731	314.588	421.276	380.405	385.815	368.949	428.349	324.814	448.526	411.102	297.549	121.795	154.805	156.13	163.706
B9J08_001227	TDH3	TDH3	0	-0.0755953	0.661925	0.570461	0.000215275	11.4284	4.76672e-06	5465	16159	4258	2614	8345	8170	2455	2725	4361	4427	6286	4400	5765	2247	3958	2088	2764	5660	6333	3907	5831	2852	5584	6057	2373.85	2252.78	2214.07	2275.24	2131.95	2259.57	3080.85	2372.46	2111.05	2361.03	2553.55	2389.08	2659.65	2947.86	2675.16	2848.49
B9J08_005229	NA	FMN1	0	0.129336	0.446505	0.701255	0.000259253	6.61553	6.05079e-06	224	612	184	92	310	312	80	102	198	181	200	167	188	66	139	75	110	210	158	118	168	99	188	228	97.3	85.321	95.676	80.077	79.198	86.29	100.394	88.804	95.847	96.532	81.245	90.677	86.733	86.586	93.948	102.316
B9J08_000815	NA	SPT8	0	0.286726	-0.0166989	-0.76975	0.00515867	4.97597	0.000303572	70	212	46	36	117	97	34	42	51	55	78	50	87	26	52	34	56	94	50	29	56	15	28	33	30.406	29.556	23.919	31.335	29.891	26.827	42.668	36.566	24.688	29.333	31.686	27.149	40.137	34.11	35.146	46.383
B9J08_005571	TNA1	TNA1	0	-1.45152	0.647093	0.75255	1.21094e-05	4.78057	1.32938921858192e-7	22	53	13	19	17	11	5	8	8	23	19	9	252	109	125	58	38	73	262	148	227	165	246	228	9.556	7.389	6.76	16.538	4.343	3.042	6.275	6.965	3.873	12.266	7.718	4.887	116.259	142.998	84.486	79.125
B9J08_000112	PEX19	PEX19	0	-0.144507	-0.751009	-0.794627	0.00551257	7.31163	0.000329897	373	967	273	165	605	474	104	149	278	294	341	225	588	230	289	142	287	515	241	123	191	152	159	189	162.021	134.813	141.954	143.617	154.563	131.094	130.512	129.724	134.573	156.797	138.524	122.169	271.27	301.739	195.332	193.719
B9J08_001153	NA	RTC3	0	0.0500196	0.536177	0.70032	0.00146419	10.2785	6.01682e-05	2726	7457	2066	1390	3886	3737	1073	1515	2245	2174	3171	1874	2492	876	1617	996	1211	2423	2473	1497	2064	1392	2312	2700	1184.1	1039.6	1074.28	1209.86	992.783	1033.54	1346.54	1319	1086.75	1159.45	1288.15	1017.53	1149.67	1149.23	1092.91	1358.76
B9J08_005154	NA	RTC2	0	-0.00485768	0.636764	0.444648	0.00590518	6.84773	0.000365389	194	578	182	115	319	321	70	90	191	174	230	158	238	119	193	108	134	274	320	167	258	141	230	237	84.268	80.581	94.636	100.097	81.497	88.779	87.845	78.357	92.458	92.798	93.432	85.79	109.8	156.117	130.446	147.335
B9J08_003103	SER1	SER1	0	-0.3085	-0.336972	-0.94004	0.00555476	6.535	0.000334638	222	776	189	98	434	415	78	144	216	144	239	197	260	87	171	84	82	228	105	80	160	36	81	100	96.431	108.185	98.276	85.3	110.877	114.776	97.884	125.371	104.56	76.799	97.088	106.966	119.949	114.136	115.577	114.594
B9J08_001080	NA	PIN2	0	-0.44657	-0.980984	-0.935824	0.00567067	5.57232	0.000343883	126	629	163	69	334	261	44	78	164	137	185	125	113	36	75	23	41	89	34	22	37	14	41	39	54.731	87.691	84.757	60.058	85.329	72.185	55.217	67.909	79.388	73.065	75.152	67.872	52.132	47.229	50.692	31.377
B9J08_001879	NA	TRM7	0	0.199131	-0.285417	-0.652495	0.00567078	5.54228	0.000346688	97	321	81	58	197	154	35	47	105	84	101	70	132	50	72	58	68	141	70	33	72	30	38	61	42.134	44.752	42.118	50.484	50.329	42.592	43.922	40.92	50.828	44.799	41.029	38.008	60.897	65.596	48.664	79.125
B9J08_003357	NA	RPN13	0	0.268438	-0.200662	-0.500577	0.00567078	6.93544	0.000347283	345	1201	286	189	696	535	111	181	294	300	354	272	273	67	164	78	150	339	129	94	125	68	102	101	149.859	167.435	148.714	164.507	177.812	147.965	139.297	157.584	142.318	159.997	143.805	147.689	125.947	87.898	110.846	106.409
B9J08_004937	NA	NA	0	0.00815541	-0.650846	-0.582609	0.00568075	5.79168	0.000349027	165	441	107	73	270	239	50	80	130	118	156	112	142	40	95	49	54	160	61	32	52	30	53	62	71.672	61.481	55.638	63.54	68.979	66.1	62.746	69.65	62.93	62.932	63.371	60.813	65.511	52.476	64.209	66.847
B9J08_000391	NAT2	NAT2	0	0.0095944	-0.678786	-0.540038	0.00590518	5.9055	0.000366349	153	530	153	71	284	280	47	77	156	115	173	112	150	50	98	40	98	141	47	45	62	27	70	68	66.459	73.889	79.557	61.799	72.555	77.44	58.982	67.038	75.516	61.332	70.277	60.813	69.202	65.596	66.237	54.569
B9J08_000169	NA	SRX1	0	-0.125727	0.635759	1.0827	0.00627678	7.3987	0.000404428	527	2421	615	265	1424	1260	146	416	779	633	785	587	138	56	132	43	78	161	125	148	150	80	217	294	228.915	337.519	319.788	230.657	363.799	348.478	183.219	362.182	377.094	337.594	318.889	318.725	63.665	73.467	89.217	58.661
B9J08_001906	NA	DIG2	0	0.157731	-0.804761	-0.896108	0.00593001	4.47183	0.000369073	67	153	46	26	89	71	22	16	35	31	43	16	78	25	47	29	39	87	31	17	23	17	23	24	29.103	21.33	23.919	22.631	22.737	19.636	27.608	13.93	16.943	16.533	17.468	8.688	35.985	32.798	31.767	39.562
B9J08_002268	PRE9	PRE9	0	0.15166	-0.455455	-0.374231	0.00602248	8.14155	0.00037603	911	3177	858	449	1888	1476	249	498	828	783	1010	798	543	159	326	153	301	621	211	141	260	153	198	255	395.714	442.916	446.143	390.812	482.34	408.217	312.477	433.573	400.813	417.593	410.29	433.293	250.51	208.594	220.339	208.725
B9J08_000384	PHR2	GAS1	0	0.184399	0.628614	0.506219	0.00515867	9.38735	0.000302588	1885	7642	1986	877	3738	3541	648	1121	2131	1509	1914	1759	849	314	631	425	479	909	823	568	943	404	773	885	818.794	1065.39	1032.68	763.345	954.972	979.334	813.193	975.975	1031.56	804.787	777.519	955.09	391.681	411.94	426.485	579.792
B9J08_001506	NA	PFF1	0	-0.102472	0.575275	0.37341	0.00605647	6.82372	0.000382305	276	742	222	125	418	426	93	137	227	195	244	204	228	82	145	91	83	225	244	132	195	103	171	194	119.887	103.445	115.435	108.801	106.789	117.819	116.708	119.276	109.885	103.998	99.12	110.767	105.186	107.577	98.004	124.144
B9J08_001678	NA	NA	0	0.965459	0.0292034	0.556418	0.00605647	5.57651	0.000382985	121	383	107	90	219	223	36	54	110	127	140	80	68	16	66	53	64	146	44	35	43	34	61	75	52.559	53.395	55.638	78.336	55.949	61.675	45.177	47.014	53.248	67.732	56.872	43.438	31.371	20.991	44.609	72.304
B9J08_004899	orf19.1430	NA	0	-0.640991	0.392442	0.483604	0.00605647	6.05404	0.000380839	240	1249	307	126	527	475	89	178	344	319	358	280	69	29	39	16	19	46	59	38	52	26	61	67	104.25	174.127	159.634	109.671	134.636	131.371	111.689	154.972	166.521	170.131	145.429	152.032	31.833	38.045	26.36	21.827
B9J08_005445	NA	RPN11	0	0.23083	-0.495752	-0.501993	0.00608974	6.72952	0.000386303	313	1206	299	133	569	546	75	160	337	298	351	291	241	58	137	74	121	271	85	54	110	52	76	108	135.959	168.132	155.474	115.764	145.366	151.007	94.12	139.301	163.133	158.931	142.586	158.005	111.184	76.091	92.597	100.952
B9J08_002889	CCR4	NGL1	0	0.203483	0.625295	0.713881	0.00279496	7.32755	0.00013381	443	1501	459	224	873	909	128	269	447	492	523	489	193	81	132	70	143	224	184	138	204	101	194	252	192.427	209.259	238.671	194.971	223.031	251.402	160.631	234.199	216.381	262.396	212.457	265.514	89.039	106.265	89.217	95.495
B9J08_000449	GAP6	GAP1	0	0.0463809	0.39908	0.694483	0.00291441	7.05603	0.000143017	412	1416	360	152	707	649	123	190	352	333	457	294	178	82	118	75	96	192	167	119	134	104	169	224	178.962	197.409	187.193	132.302	180.622	179.494	154.356	165.419	170.394	177.597	185.646	159.634	82.119	107.577	79.755	102.316
B9J08_001695	TPS1	TPS1	0	0.0948773	0.622249	0.409319	0.00113132	8.03656	4.28382e-05	673	2302	586	375	1298	1085	222	379	714	568	780	627	417	152	254	166	209	426	447	255	363	176	308	396	292.333	320.929	304.708	326.402	331.609	300.078	278.594	329.968	345.629	302.928	316.857	340.444	192.38	199.41	171.675	226.46
B9J08_005207	PDB1	PDB1	0	-0.150184	0.401553	0.53971	0.00627678	10.0142	0.00040098	2029	8844	2200	878	4344	4168	617	1276	2508	1981	2537	2353	1793	781	1396	665	910	1764	1643	1136	1712	999	1735	1987	881.344	1232.97	1143.95	764.216	1109.79	1152.74	774.29	1110.92	1214.06	1056.52	1030.6	1277.62	827.19	1024.6	943.539	907.205
B9J08_005569	NA	YMR210W	0	-0.0944845	0.578601	0.566169	0.00627678	5.90405	0.00040438	125	471	162	69	254	230	36	73	152	124	175	134	105	38	66	32	51	98	98	59	104	64	75	109	54.297	65.664	84.237	60.058	64.891	63.611	45.177	63.556	73.579	66.132	71.09	72.758	48.441	49.853	44.609	43.655
B9J08_000164	CDR1	PDR5	0	-0.0972133	0.351527	0.519182	0.0064016	6.06917	0.000415592	143	546	140	60	315	245	50	89	153	138	192	137	125	42	88	36	61	125	96	74	99	71	98	121	62.115	76.12	72.797	52.224	80.475	67.76	62.746	77.486	74.063	73.599	77.996	74.387	57.668	55.1	59.478	49.112
B9J08_003799	MP65	SCW10	0	-0.073472	-0.567034	-0.694863	0.0064016	11.0324	0.000416302	3856	9697	2642	1867	5015	4910	1463	1593	2769	2682	3564	2426	9378	2577	6477	2842	4027	8741	2829	2769	4353	1656	3211	3979	1674.94	1351.89	1373.79	1625.05	1281.22	1357.96	1835.96	1386.91	1340.4	1430.38	1447.8	1317.25	4326.48	3380.79	4377.72	3877.11
B9J08_004925	NA	RBD2	0	0.139491	0.555408	0.694195	1.72558e-05	7.09938	2.09974728880348e-7	291	1062	254	136	531	528	111	165	292	270	348	281	245	81	166	85	140	277	220	147	232	125	232	279	126.403	148.057	132.075	118.375	135.658	146.029	139.297	143.654	141.35	143.998	141.367	152.575	113.029	106.265	112.197	115.958
B9J08_003526	MUC1	NA	0	0.193984	-0.509838	-2.58916	0.00682872	1.51336	0.000450785	5	30	8	6	22	10	3	2	3	9	10	7	7	2	7	2	6	9	8	1	2	0	0	1	2.172	4.182	4.16	5.222	5.62	2.766	3.765	1.741	1.452	4.8	4.062	3.801	3.229	2.624	4.731	2.728
B9J08_004871	NA	NA	0	0.374449	-0.707055	-0.621343	0.00682872	4.73551	0.000450889	49	184	39	29	107	99	27	27	49	36	49	49	90	18	57	36	48	109	19	27	38	12	41	32	21.284	25.652	20.279	25.242	27.336	27.38	33.883	23.507	23.72	19.2	19.905	26.606	41.521	23.614	38.526	49.112
B9J08_000363	NCE103	NCE103	0	-0.267197	0.0419261	-0.827258	0.00689278	7.75941	0.000456493	386	1609	478	171	732	641	133	229	355	252	276	320	688	244	577	162	338	744	346	408	533	127	264	293	167.668	224.316	248.55	148.839	187.009	177.281	166.905	199.374	171.846	134.398	112.119	173.751	317.405	320.106	389.987	221.003
B9J08_000046	NA	UNG1	0	0.174701	-1.06182	-0.93118	0.00696907	4.66022	0.000462936	67	248	90	34	160	127	20	36	77	42	72	56	69	20	41	18	37	83	13	8	36	8	19	27	29.103	34.574	46.798	29.594	40.876	35.124	25.099	31.343	37.274	22.4	29.248	30.406	31.833	26.238	27.711	24.556
B9J08_001082	SLM2	SLM2	0	-0.193431	0.542622	0.505495	0.00703373	6.3814	0.000468635	215	535	136	86	305	309	85	93	169	142	227	122	172	56	112	62	64	148	154	88	174	68	156	165	93.39	74.586	70.717	74.855	77.92	85.46	106.669	80.968	81.809	75.732	92.214	66.243	79.351	73.467	75.699	84.581
B9J08_004913	NA	BPT1	0	0.0227245	0.564985	0.684815	0.00753011	5.78649	0.000524238	109	383	91	60	176	179	55	57	102	86	128	89	102	30	92	45	47	117	93	73	104	66	90	127	47.347	53.395	47.318	52.224	44.964	49.506	69.021	49.626	49.376	45.866	51.997	48.325	47.057	39.357	62.182	61.39
B9J08_005232	NA	BUL1	0	-0.165096	0.429308	0.683148	0.00644111	6.54799	0.000420156	284	830	209	162	527	490	88	172	271	266	348	216	120	48	96	31	73	118	95	93	109	51	125	181	123.362	115.713	108.676	141.006	134.636	135.519	110.434	149.748	131.184	141.864	141.367	117.282	55.361	62.972	64.885	42.291
B9J08_000551	NA	VPS68	0	0.0062767	0.619168	0.612163	0.000148459	6.84365	2.87264e-06	188	660	199	113	352	342	78	101	203	179	209	173	238	96	183	78	135	285	267	158	249	145	213	277	81.662	92.013	103.476	98.356	89.928	94.587	97.884	87.934	98.267	95.465	84.902	93.934	109.8	125.943	123.687	106.409
B9J08_004026	NA	COS111	0	-0.316535	0.527896	0.680074	0.00188417	6.43992	8.19368e-05	230	741	160	136	379	342	96	110	170	225	259	155	146	58	90	45	55	119	154	78	127	78	123	180	99.906	103.305	83.197	118.375	96.826	94.587	120.473	95.769	82.293	119.998	105.213	84.161	67.356	76.091	60.83	61.39
B9J08_001985	orf19.1664	NA	0	0.611681	-0.655835	-0.26037	0.0073976	4.6429	0.000501733	42	142	33	37	78	86	11	20	34	57	41	26	81	26	47	48	59	108	20	29	34	14	41	49	18.244	19.797	17.159	32.205	19.927	23.785	13.804	17.413	16.459	30.399	16.655	14.117	37.369	34.11	31.767	65.482
B9J08_004783	NA	SBE22	0	0.211048	0.612083	0.722513	0.00120506	5.94552	4.63948e-05	127	438	124	66	204	186	47	72	128	120	139	93	105	37	89	42	60	151	111	69	114	61	104	141	55.165	61.063	64.477	57.447	52.117	51.442	58.982	62.685	61.961	63.999	56.466	50.496	48.441	48.541	60.154	57.297
B9J08_002723	NA	OPY1	0	-0.115289	-1.12712	-1.00944	0.00743123	5.13339	0.000507142	97	439	113	52	259	190	32	49	116	73	106	113	89	25	59	19	46	84	18	15	33	9	31	29	42.134	61.202	58.758	45.261	66.168	52.548	40.158	42.661	56.153	38.933	43.06	61.356	41.06	32.798	39.877	25.92
B9J08_005186	RPT6	RPT6	0	0.10663	-0.337782	-0.596495	0.00743123	6.93536	0.00050846	398	1430	346	199	773	634	94	201	351	342	392	361	240	64	166	78	132	245	99	86	114	56	74	112	172.881	199.361	179.913	173.211	197.484	175.345	117.963	174.996	169.91	182.397	159.241	196.013	110.723	83.962	112.197	106.409
B9J08_001860	PGK1	PGK1	0	0.0272006	0.512361	0.67875	0.00819818	11.6378	0.000594583	8460	33996	8818	3771	17344	16698	2559	5366	10137	7297	10243	9334	4343	1515	3115	1701	2212	4292	3529	2924	4090	1780	4502	6036	3674.8	4739.49	4585.18	3282.3	4430.99	4618.16	3211.36	4671.8	4907.06	3891.67	4160.99	5068.11	2003.62	1987.55	2105.39	2320.53
B9J08_000716	NA	NA	0	-0.0378098	0.566135	0.546405	0.00753011	6.77091	0.000521521	344	961	258	178	619	488	116	203	309	334	382	259	154	50	98	63	63	145	119	110	139	61	138	157	149.424	133.976	134.155	154.932	158.14	134.966	145.572	176.738	149.579	178.13	155.179	140.63	71.047	65.596	66.237	85.946
B9J08_004441	NA	YDL073W	0	-0.0997664	0.556548	0.674295	0.00531927	6.54614	0.000314673	243	542	180	94	288	282	78	95	173	153	182	119	194	64	141	79	82	180	136	157	194	106	189	210	105.553	75.562	93.596	81.818	73.577	77.993	97.884	82.71	83.745	81.599	73.933	64.614	89.501	83.962	95.3	107.773
B9J08_002825	NA	NA	0	0.162009	-0.812768	-1.00636	0.00753011	11.7499	0.000523124	6825	13179	3891	4025	7832	7285	2891	2121	3412	3856	5710	2597	17501	5430	11165	6233	8958	19838	5784	3927	6111	3459	4263	5079	2964.6	1837.33	2023.24	3503.38	2000.89	2014.81	3627.99	1846.6	1651.66	2056.5	2319.56	1410.1	8073.98	7123.68	7546.28	8503.17
B9J08_003030	NA	GTF1	0	-0.0784033	0.294056	0.531883	0.00753011	6.13303	0.000518729	221	593	148	83	317	273	64	89	201	145	201	148	131	37	79	44	52	118	93	57	99	62	95	124	95.997	82.672	76.957	72.244	80.986	75.504	80.315	77.486	97.299	77.332	81.652	80.36	60.436	48.541	53.395	60.026
B9J08_001850	ADE17	ADE17	0	0.103985	0.605583	0.634474	0.000327881	9.51175	8.37199e-06	1415	5181	1347	645	2695	2521	530	788	1520	1226	1705	1495	1284	519	983	595	725	1409	1340	884	1381	770	1317	1387	614.638	722.299	700.413	561.411	688.51	697.232	665.111	686.056	735.792	653.856	692.618	811.745	592.366	680.882	664.397	811.709
B9J08_001500	NA	NA	0	-0.188426	0.5115	0.545373	0.00760099	8.33049	0.00053069	763	3058	719	327	1664	1347	198	408	780	688	1020	743	513	221	369	174	241	501	566	324	465	364	452	454	331.427	426.325	373.865	284.623	425.113	372.539	248.476	355.217	377.578	366.927	414.352	403.429	236.669	289.932	249.403	237.374
B9J08_002063	NA	CAT5	0	0.175879	-0.318537	-0.55575	0.00761273	7.50562	0.000533028	459	1383	430	209	857	726	145	225	358	355	398	366	516	134	283	171	288	440	174	158	266	110	141	236	199.377	192.808	223.591	181.915	218.944	200.79	181.964	195.892	173.298	189.33	161.679	198.728	238.053	175.796	191.276	233.281
B9J08_001004	NA	MAL13	0	-0.277765	-0.944871	-1.19274	0.00769086	4.36854	0.000541567	38	177	48	28	100	96	16	22	55	55	53	32	58	25	47	15	27	58	16	12	29	7	17	21	16.506	24.676	24.959	24.371	25.548	26.551	20.079	19.154	26.624	29.333	21.53	17.375	26.758	32.798	31.767	20.463
B9J08_003278	MCM1	MCM1	0	0.0538913	-0.389166	-0.553248	0.0078277	7.74294	0.000554325	608	1252	496	260	883	698	184	262	461	328	510	366	595	192	371	213	315	533	279	179	268	118	233	277	264.099	174.545	257.91	226.305	225.586	193.046	230.907	228.105	223.158	174.93	207.176	198.728	274.5	251.887	250.754	290.578
B9J08_002599	NA	FMP25	0	0.0359714	-0.665273	-0.303093	0.00783604	6.13922	0.000558042	212	711	185	114	444	338	70	123	215	219	226	169	128	54	86	45	58	162	49	34	58	34	62	79	92.087	99.123	96.196	99.226	113.432	93.481	87.845	107.087	104.076	116.798	91.807	91.762	59.052	70.843	58.126	61.39
B9J08_002729	NA	NA	0	-0.206076	0.547155	0.661559	0.000540355	8.73193	1.63842e-05	949	2978	698	419	1473	1435	330	497	892	759	1025	674	899	279	611	242	402	766	559	588	1036	366	850	1117	412.22	415.172	362.946	364.7	376.317	396.878	414.126	432.703	431.794	404.793	416.383	365.964	414.748	366.023	412.967	330.141
B9J08_005384	MED19	ROX3	0	-0.1203	-0.500152	-0.928111	0.00812034	5.81005	0.000583148	128	433	140	73	287	236	32	58	119	101	189	99	179	61	82	45	75	149	60	54	70	31	36	67	55.6	60.366	72.797	63.54	73.322	65.27	40.158	50.496	57.605	53.866	76.777	53.754	82.581	80.027	55.423	61.39
B9J08_002468	GPI19	GPI19	0	-0.276037	0.601216	0.625915	0.00749838	5.21524	0.00051455	77	261	63	34	129	137	24	30	82	61	85	71	71	37	46	27	24	69	84	45	67	58	57	77	33.447	36.387	32.759	29.594	32.957	37.89	30.118	26.119	39.694	32.533	34.529	38.551	32.755	48.541	31.091	36.834
B9J08_001066	NA	ITC1	0	0.11674	-0.550414	-0.741785	0.00819818	5.80076	0.000595015	171	559	140	78	284	271	32	67	150	128	169	103	161	37	82	36	74	172	46	41	66	25	41	63	74.278	77.932	72.797	67.892	72.555	74.95	40.158	58.332	72.611	68.266	68.652	55.926	74.276	48.541	55.423	49.112
B9J08_000519	DPM2	NA	0	-0.244503	0.434083	0.656323	0.000392602	7.64109	1.04161e-05	398	1301	447	165	691	728	123	162	449	330	423	404	403	154	312	105	196	409	352	253	380	234	386	482	172.881	181.376	232.431	143.617	176.534	201.343	154.356	141.042	217.349	175.997	171.834	219.361	185.922	202.034	210.877	143.243
B9J08_003152	IST2	IST2	0	-0.00901989	0.519962	0.647686	0.00159286	7.76911	6.67267e-05	530	1221	332	209	573	595	182	226	367	313	428	324	493	160	348	166	231	528	428	273	495	250	450	543	230.218	170.223	172.633	181.915	146.388	164.559	228.397	196.762	177.655	166.931	173.865	175.923	227.443	209.906	235.209	226.46
B9J08_001809	SOU1	SPS19	0	0.119888	0.59951	0.70741	0.00052197	9.80079	1.57226e-05	1834	5884	1639	905	3122	2958	639	1033	1820	1411	2151	1740	1730	606	1095	779	812	1744	1765	949	1692	962	1613	1849	796.641	820.307	852.247	787.717	797.599	818.093	801.898	899.36	881.015	752.521	873.795	944.773	798.125	795.018	740.097	1062.72
B9J08_000185	RPS7A	RPS7A	0	-0.21415	0.501042	0.630221	0.000980436	9.97632	3.55953e-05	2061	6259	1789	888	2647	3433	659	1054	1888	1705	2208	1781	2144	661	1906	571	1099	2056	1576	1456	2374	1010	2244	2544	895.243	872.587	930.244	772.92	676.247	949.464	826.997	917.643	913.932	909.318	896.95	967.035	989.122	867.173	1288.24	778.968
B9J08_003168	UBP6	UBP6	0	0.186535	-0.373722	-0.504436	0.00837992	7.11858	0.000615163	427	1755	473	198	935	826	116	242	461	408	570	446	251	85	139	73	155	277	110	75	116	52	97	116	185.477	244.67	245.95	172.34	238.871	228.447	145.572	210.692	223.158	217.596	231.55	242.166	115.797	111.512	93.948	99.588
B9J08_001696	NA	MDM36	0	-0.346105	0.597753	0.833078	0.00602591	6.24045	0.000377446	237	471	172	128	298	332	83	93	164	201	210	120	106	47	91	33	53	92	90	97	124	66	107	189	102.946	65.664	89.437	111.412	76.132	91.821	104.159	80.968	79.388	107.198	85.308	65.157	48.902	61.66	61.506	45.019
B9J08_000417	CDC24	CDC24	0	-0.391176	-0.61498	-1.30067	0.00885377	5.27218	0.00065348	93	304	67	52	155	161	39	37	67	67	116	53	170	32	81	37	49	101	41	37	68	14	35	37	40.397	42.382	34.839	45.261	39.599	44.528	48.942	32.213	32.433	35.733	47.122	28.778	78.428	41.981	54.747	50.476
B9J08_003372	RPN4	RPN4	0	-0.100921	-0.472105	-0.73463	0.0088903	7.17021	0.000657949	624	2200	525	395	1370	1084	205	357	701	691	772	536	181	74	129	43	111	192	84	54	95	38	73	75	271.049	306.709	272.989	343.81	350.003	299.802	257.26	310.815	339.336	368.527	313.608	291.034	83.503	97.081	87.189	58.661
B9J08_002286	NA	NA	0	-0.208904	-0.576311	-1.16387	0.00890067	5.17716	0.000660493	112	360	106	56	226	171	29	43	117	101	120	91	97	28	49	21	38	79	38	18	40	21	14	29	48.65	50.189	55.118	48.743	57.738	47.293	36.393	37.437	56.637	53.866	48.747	49.411	44.75	36.733	33.118	28.649
B9J08_004239	LAG1	LAG1	0	-0.0177717	0.365615	0.618509	0.00049165	7.85361	1.41228e-05	500	1679	460	229	956	854	180	304	502	453	635	426	405	165	295	141	204	484	382	223	347	243	351	478	217.187	234.075	239.191	199.323	244.236	236.191	225.887	264.671	243.005	241.596	257.954	231.307	186.844	216.465	199.387	192.355
B9J08_003502	NA	SBH2	0	0.0187093	0.596368	0.695899	0.00143504	9.14243	5.83977e-05	1066	4543	1184	523	2483	2293	342	677	1422	1194	1317	1324	917	333	773	319	526	1088	925	638	981	528	941	1159	463.042	633.354	615.656	455.222	634.349	634.175	429.185	589.416	688.353	636.789	535.002	718.896	423.052	436.866	522.461	435.185
B9J08_001784	NA	VMA16	0	-0.0633944	0.562612	0.611555	0.00049165	7.26168	1.39593e-05	331	956	238	148	454	464	92	153	280	281	321	243	307	123	240	117	157	324	351	199	293	196	294	324	143.778	133.279	123.755	128.82	115.986	128.328	115.453	133.206	135.541	149.864	130.399	131.942	141.633	161.365	162.213	159.613
B9J08_000049	KRE9	KRE9	0	-0.204087	0.504009	0.245791	0.00919704	7.40414	0.000693493	308	1149	270	140	494	444	112	181	271	275	326	285	454	129	306	150	179	344	396	258	363	187	347	274	133.787	160.186	140.395	121.857	126.206	122.797	140.552	157.584	131.184	146.664	132.43	154.747	209.45	169.236	206.822	204.633
B9J08_000445	NA	IBA57	0	-0.0828144	0.592085	0.806733	0.00897393	5.66336	0.000673089	103	396	132	58	238	283	40	62	152	128	168	144	67	26	55	27	41	61	55	59	73	38	84	87	44.74	55.208	68.637	50.484	60.803	78.269	50.197	53.979	73.579	68.266	68.246	78.188	30.91	34.11	37.174	36.834
B9J08_000088	NA	PAC10	0	0.0566026	-0.642244	-0.592818	0.00934224	6.89444	0.00071376	302	1089	244	155	788	507	106	131	278	215	343	262	328	127	140	100	143	327	134	67	113	53	116	144	131.181	151.821	126.875	134.913	201.316	140.221	133.022	114.052	134.573	114.665	139.336	142.259	151.321	166.613	94.624	136.422
B9J08_001195	NA	NA	0	-0.0154185	-0.445245	-0.798532	0.00955062	6.33913	0.000733491	161	515	134	92	242	257	56	87	132	133	165	109	300	80	188	74	147	299	94	100	144	34	103	126	69.934	71.798	69.677	80.077	61.825	71.078	70.276	75.745	63.898	70.932	67.028	59.184	138.403	104.953	127.067	100.952
B9J08_001314	NA	NA	0	0.0453952	-0.65043	-0.74805	0.0095852	5.77982	0.000738059	104	289	91	55	171	151	47	36	99	93	144	66	208	60	131	66	105	203	58	57	95	27	72	92	45.175	40.29	47.318	47.872	43.687	41.762	58.982	31.343	47.923	49.599	58.497	35.836	95.96	78.715	88.541	90.038
B9J08_001930	AOX2	NA	0	-0.523787	-0.715346	-1.16374	0.00960837	10.2558	0.000741759	3701	11422	2614	2371	9346	6285	1381	1746	3143	3435	4595	2349	3045	988	2263	484	1234	2845	1116	806	1213	298	770	1496	1607.62	1592.38	1359.23	2063.73	2387.69	1738.24	1733.05	1520.12	1521.44	1831.97	1866.62	1275.44	1404.79	1296.17	1529.53	660.281
B9J08_004536	orf19.3701	NA	0	0.386989	-0.299396	-0.688533	0.00968063	7.05492	0.000749269	653	1690	426	375	881	872	281	302	453	511	666	390	205	50	110	84	105	238	86	64	86	36	58	80	283.646	235.608	221.511	326.402	225.075	241.169	352.635	262.93	219.286	272.529	270.547	211.759	94.576	65.596	74.348	114.594
B9J08_004601	RNR1	RNR1	0	0.343462	-0.737532	-0.453251	0.00968469	7.27383	0.000751515	685	1357	391	261	1391	774	178	172	421	310	447	294	362	97	187	109	204	450	85	87	141	56	120	205	297.546	189.184	203.312	227.176	355.368	214.065	223.377	149.748	203.795	165.331	181.584	159.634	167.007	127.255	126.391	148.7
B9J08_002342	NDE1	NDE1	0	0.00211161	0.573481	0.605742	6.46172e-05	8.76264	1.05697e-06	968	2790	770	502	1411	1447	365	438	947	687	944	742	911	297	565	299	420	913	753	543	876	443	754	928	420.473	388.963	400.384	436.943	360.478	400.196	458.048	381.335	458.418	366.394	383.479	402.886	420.284	389.637	381.876	407.901
B9J08_005200	NA	NA	0	-0.164048	0.392075	0.593562	0.00313982	8.69771	0.000157149	757	2875	809	316	1475	1411	228	435	896	669	902	794	807	308	755	286	390	890	781	545	707	513	782	924	328.821	400.813	420.664	275.048	376.828	390.24	286.123	378.724	433.73	356.794	366.417	431.121	372.305	404.068	510.295	390.166
B9J08_001940	NA	HSP12	0	-0.148691	0.587351	0.484114	0.000249003	13.105	5.71221e-06	22967	81141	22729	10347	53055	38843	7540	13925	24710	19370	26259	22990	14092	4404	9640	4147	6243	12638	12929	7882	14132	6891	10690	12735	9976.25	11312.1	11818.6	9006.08	13554.3	10742.8	9462.15	12123.5	11961.5	10330.5	10667.1	12483	6501.26	5777.65	6515.56	5657.41
B9J08_004096	NA	LPX1	0	-0.173371	-0.76501	-0.99737	0.00999144	6.18217	0.000783291	175	519	122	100	264	248	47	77	106	155	180	95	279	89	138	73	106	230	125	58	68	55	74	69	76.015	72.355	63.438	87.041	67.446	68.589	58.982	67.038	51.312	82.665	73.121	51.582	128.715	116.76	93.272	99.588
[truncated: 8 more columns]

## Sheet: BRG1_up and down in Lac
cut-off of FDR < 0.01 and log2FC ± 0.585
UPREGULATED GENES IN LACTATE												DOWNREGULATED GENES IN LACTATE
Name	albicans_orthologue	cerevisiae_orthologue	470140_Wrinkled_Lactate	dbrg1_Lactate	dirf1_Lactate	dume6_Lactate	FDR	AveExpr	P value			Name	albicans_orthologue	cerevisiae_orthologue	470140_Wrinkled_Lactate	dbrg1_Lactate	dirf1_Lactate	dume6_Lactate	FDR	AveExpr	P value
B9J08_004110	IFF3	NA	0	0.91611	-5.07052	-4.80079	1.32367685484136e-12	6.86275	2.6404884397394e-16			B9J08_002529	BRG1	GAT2	0	-3.1362	-2.8445	-2.93377	2.18710323718634e-9	4.82094	1.74514521219736e-12
B9J08_004986	NA	YNL234W	0	1.05006	-1.06552	-0.840343	2.80283200860199e-8	5.79228	5.59112708677835e-11			B9J08_002295	NA	NA	0	-0.915567	-4.02143	-4.99774	4.62742359658445e-7	3.72646	2.40002021765801e-9
B9J08_003950	TEC1	TEC1	0	0.674944	-1.838	-1.87537	7.74369828057665e-8	7.6806	1.86274397539684e-10			B9J08_000389	NA	NA	0	-2.53005	-0.291222	-3.38902	5.95010432936132e-7	6.18247	3.2047240553113e-9
B9J08_002356	NA	NA	0	0.625584	1.08604	1.27758	1.33419e-06	8.69593	1.02166142436343e-8			B9J08_004410	CRH11	CRH1	0	-0.774711	-1.0324	-1.58108	8.36054107613224e-7	8.20741	4.94831823275579e-9
B9J08_004976	NA	NA	0	0.644091	-1.38049	-1.34176	3.38439e-05	5.30692	4.45580376103199e-7			B9J08_004498	ALS1	SAG1	0	-0.805364	-1.74024	-6.00823	1.33419e-06	6.27734	1.03796908205871e-8
B9J08_000117	PGA31	NA	0	1.56236	-0.59367	-1.70014	0.000178542	1.38565	3.73965e-06			B9J08_005571	TNA1	TNA1	0	-1.45152	0.647093	0.75255	1.21094e-05	4.78057	1.32938921858192e-7
B9J08_003568	GCY1	GCY1	0	2.09179	3.73979	3.74431	0.000458021	1.47564	1.22431e-05			B9J08_001287	NA	NA	0	-0.651953	-1.32282	-2.2249	1.38367e-05	5.29045	1.62850173979153e-7
B9J08_001617	NA	NA	0	0.643737	-0.399593	-0.472213	0.000626742	4.50811	1.98593e-05			B9J08_002333	orf19.2252	NA	0	-0.659134	-1.44573	-2.83759	0.000994561	2.85942	3.65049e-05
B9J08_001951	CSA1	NA	0	0.993275	0.15203	0.911708	0.000980436	9.66428	3.54632e-05			B9J08_000438	PGA30	NA	0	-1.07573	-1.03237	-1.18666	0.00372496	4.86006	0.000197654
B9J08_001550	orf19.867	AIM14	0	0.626242	-0.117785	3.73429	0.00200097	0.585597	8.90119e-05			B9J08_004899	orf19.1430	NA	0	-0.640991	0.392442	0.483604	0.00605647	6.05404	0.000380839
B9J08_001678	NA	NA	0	0.965459	0.0292034	0.556418	0.00605647	5.57651	0.000382985
B9J08_004892	HYR3	FLO5	0	1.71904	0.704077	-0.0601846	0.00708245	6.33873	0.000476119
B9J08_001985	orf19.1664	NA	0	0.611681	-0.655835	-0.26037	0.0073976	4.6429	0.000501733

## Sheet: Fig4E_IRF1_up and down in Lac
cut-off of FDR < 0.01 and log2FC ± 0.585
UPREGULATED GENES IN LACTATE												DOWNREGULATED GENES IN LACTATE
Name	albicans_orthologue	cerevisiae_orthologue	470140_Wrinkled_Lactate	dbrg1_Lactate	dirf1_Lactate	dume6_Lactate	FDR	AveExpr	P value			Name	albicans_orthologue	cerevisiae_orthologue	470140_Wrinkled_Lactate	dbrg1_Lactate	dirf1_Lactate	dume6_Lactate	FDR	AveExpr	P value
B9J08_003568	GCY1	GCY1	0	2.09179	3.73979	3.74431	0.000458021	1.47564	1.22431e-05			B9J08_004110	IFF3	NA	0	0.91611	-5.07052	-4.80079	1.32367685484136e-12	6.86275	2.6404884397394e-16
B9J08_005114	SRR1	SKN7	0	0.142795	2.20446	2.46548	0.00052197	5.44816	1.57209e-05			B9J08_004946	HGC1	CLN2	0	0.322345	-1.54152	-3.75139	3.76259379164363e-10	6.67034	1.50113456678382e-13
B9J08_005063	NA	NA	0	0.228794	2.07698	2.43566	0.00819818	4.74456	0.000595279			B9J08_002529	BRG1	GAT2	0	-3.1362	-2.8445	-2.93377	2.18710323718634e-9	4.82094	1.74514521219736e-12
B9J08_004893	orf19.3232	TNA1	0	0.0677484	2.06149	2.84512	5.42784e-05	4.93594	8.33719244349087e-7			B9J08_004729	BEM2	BEM2	0	-0.0665887	-1.11717	-1.67621	2.18710323718634e-9	6.58855	1.48342312957738e-12
B9J08_005018	CDC21	CDC21	0	-0.581042	2.03605	1.44477	6.51773331864142e-7	11.2218	3.64046544827369e-9			B9J08_003251	XOG1	EXG1	0	0.163294	-1.21637	-1.93626	2.8907208809379e-9	8.93469	2.88322449724506e-12
B9J08_004825	NA	PIC2	0	0.149706	1.93287	2.08786	2.46634036887476e-7	7.37984	1.13157447604467e-9			B9J08_002149	YPS7	YPS7	0	-0.446162	-1.17207	-1.97361	2.35643057872381e-8	5.78782	3.29044764633286e-11
B9J08_000030	NA	NA	0	0.148337	1.90023	2.17378	0.000240964	5.595	5.47974e-06			B9J08_000592	UME6	UME6	0	-0.115433	-1.22068	-5.47066	2.37057631920182e-8	6.07652	3.78308608689697e-11
B9J08_003550	YWP1	FLO5	0	-0.0285565	1.69705	1.78323	7.7929482790033e-8	11.3641	2.33182174715838e-10			B9J08_000892	NA	NA	0	0.29341	-1.96958	-1.85327	2.38860924776293e-8	5.98613	4.28834694391908e-11
B9J08_002118	NA	NA	0	0.106051	1.6205	1.7881	1.21094e-05	8.56197	1.35273840403148e-7			B9J08_004986	NA	YNL234W	0	1.05006	-1.06552	-0.840343	2.80283200860199e-8	5.79228	5.59112708677835e-11
B9J08_001932	ASR1	NA	0	-0.323635	1.57816	1.45669	9.96118334731105e-7	8.75522	6.35862491749359e-9			B9J08_000024	NA	NA	0	-0.122036	-1.22585	-1.69988	4.73657575679198e-8	5.96482	1.0393443711293e-10
B9J08_003397	ATC1	ATH1	0	-0.294603	1.51964	1.49062	8.82262e-06	7.63651	8.79973833036681e-8			B9J08_000594	NA	NA	0	0.344509	-1.23769	-1.69264	7.74369828057665e-8	7.00787	2.16261272547523e-10
B9J08_000050	KRE9	KRE9	0	-0.0756634	1.51559	1.40011	0.000249395	2.1612	5.77096e-06			B9J08_002560	RBR2	TIP1	0	-0.246345	-1.22554	-1.60032	7.74369828057665e-8	8.50279	2.14863439418894e-10
B9J08_000210	NA	NA	0	-0.0166088	1.46224	1.11563	0.00351541	6.68523	0.000180224			B9J08_003950	TEC1	TEC1	0	0.674944	-1.838	-1.87537	7.74369828057665e-8	7.6806	1.86274397539684e-10
B9J08_004101	NA	NA	0	-0.168624	1.45941	1.90899	0.0019512	6.1937	8.52409e-05			B9J08_000266	NA	NA	0	0.397464	-2.49439	-3.47046	9.76557251158168e-8	5.42871	3.39529485089347e-10
B9J08_002372	NA	NA	0	0.27539	1.40118	1.55391	3.55624018271944e-9	7.87653	4.25642152330274e-12			B9J08_001936	NA	AMF1	0	0.21646	-1.56423	-2.2923	9.76557251158168e-8	6.44753	3.50648923216577e-10
B9J08_002694	NA	PET18	0	-0.104381	1.29497	1.62593	0.000378723	7.33545	9.97235e-06			B9J08_004787	NA	CMR3	0	0.259541	-4.71487	-1.39566	1.77475251896516e-7	6.09638	7.08060051452287e-10
B9J08_004770	NA	NA	0	-0.315846	1.29002	1.07316	0.00254454	4.59736	0.000121314			B9J08_002465	SIT1	ARN1	0	0.110364	-5.46625	-2.0134	2.02651072577929e-7	4.86213	8.48927293863256e-10
B9J08_004698	NA	YHR131C	0	0.00242485	1.28446	1.33854	6.08799e-06	7.32449	5.8293183026189e-8			B9J08_003109	NA	NA	0	-0.251386	-1.17337	-3.55284	2.32301013828174e-7	5.60809	1.01947382888886e-9
B9J08_003837	NAG1	NA	0	0.0423638	1.27128	1.75595	1.33419e-06	6.5809	9.62687501365173e-9			B9J08_004135	WOR4	NA	0	0.362279	-2.73879	-3.55605	3.77575356320784e-7	2.77125	1.80766178968658e-9
B9J08_000901	PDC11	PDC1	0	-0.252979	1.2689	1.39214	2.36246e-06	7.95792	1.93219065903405e-8			B9J08_002295	NA	NA	0	-0.915567	-4.02143	-4.99774	4.62742359658445e-7	3.72646	2.40002021765801e-9
B9J08_002119	NA	NA	0	0.125741	1.24622	1.75087	0.00447543	4.97542	0.000247296			B9J08_002376	NA	DML1	0	0.494654	-0.873539	-1.27372	4.62742359658445e-7	5.47984	2.39071698492223e-9
B9J08_003908	SIT1	SIT1	0	0.289565	1.24615	2.74802	0.00812034	3.09783	0.000582824			B9J08_001511	LMO1	YLL007C	0	0.0820165	-1.34876	-1.05082	8.36054107613224e-7	5.13605	5.10250241448249e-9
B9J08_004838	PST3	PST2	0	-0.576288	1.21491	1.19534	0.00121297	9.80488	4.71833e-05			B9J08_002660	HGT17	HXT8	0	-0.519641	-2.61109	-1.37929	8.36054107613224e-7	5.44926	5.17009322481746e-9
B9J08_001714	NA	NA	0	0.0361041	1.19032	1.55848	0.00433581	3.97906	0.000237452			B9J08_004410	CRH11	CRH1	0	-0.774711	-1.0324	-1.58108	8.36054107613224e-7	8.20741	4.94831823275579e-9
B9J08_004171	TYE7	TYE7	0	0.0885557	1.17668	1.60561	0.00486946	9.61763	0.000276839			B9J08_002055	NA	NA	0	0.204571	-1.89009	-2.46211	1.20289e-06	8.12949	8.12551573707427e-9
B9J08_004667	NA	NA	0	-0.278757	1.16977	1.4604	1.74526e-06	7.97879	1.39258813436231e-8			B9J08_000268	GCF1	NA	0	0.0310739	-0.691672	-1.10991	1.33419e-06	8.84958	1.02295099124705e-8
B9J08_003838	DAC1	NA	0	0.152677	1.1015	1.438	0.00624316	4.34885	0.000397281			B9J08_003359	CDC3	CDC3	0	0.0179587	-0.833165	-1.29332	1.33419e-06	8.26767	9.92371752581396e-9
B9J08_002356	NA	NA	0	0.625584	1.08604	1.27758	1.33419e-06	8.69593	1.02166142436343e-8			B9J08_004498	ALS1	SAG1	0	-0.805364	-1.74024	-6.00823	1.33419e-06	6.27734	1.03796908205871e-8
B9J08_001852	NA	STP2	0	-0.431729	1.08136	1.41926	0.00705226	7.67382	0.000471276			B9J08_005424	KCH1	KCH1	0	-0.0224571	-1.28529	-1.29253	2.78249e-06	6.46739	2.3312301964749e-8
B9J08_001853	NA	FMP52	0	-0.15147	1.07873	0.847523	0.00103181	9.54045	3.82836e-05			B9J08_000187	ARF3	ARF3	0	0.0495376	-1.02341	-1.84965	3.10066e-06	7.13191	2.76567933772062e-8
B9J08_005561	NA	NA	0	-0.372741	1.03956	1.90554	0.00334222	2.254	0.000170011			B9J08_002280	GAP4	SAM3	0	-0.253398	-1.35637	-1.69804	3.10066e-06	7.90575	2.78335935757103e-8
B9J08_000476	HSP104	HSP104	0	-0.33411	1.03535	1.32597	0.000167704	9.05707	3.42635e-06			B9J08_005421	SAP3	YPS3	0	-0.224944	-1.62403	-1.96172	4.50021e-06	5.27852	4.12945259364736e-8
B9J08_003627	HSP21	NA	0	-0.146418	1.03527	1.41531	0.00970273	11.4823	0.000755746			B9J08_005443	NA	PAA1	0	-0.133614	-0.811036	-1.01675	1.09557e-05	8.35397	1.11458018758177e-7
B9J08_001171	ADH5	ADH2	0	-0.26572	1.03414	1.43143	0.00987625	10.6374	0.00077229			B9J08_003788	NA	YEL1	0	-0.126601	-0.904306	-1.55788	1.19668e-05	5.49677	1.25431214833052e-7
B9J08_004019	NA	YPL264C	0	-0.34762	1.0285	1.08732	0.00103233	4.43711	3.85092e-05			B9J08_001287	NA	NA	0	-0.651953	-1.32282	-2.2249	1.38367e-05	5.29045	1.62850173979153e-7
B9J08_005227	NA	NA	0	0.00642515	1.01844	1.03283	1.29517e-05	7.14247	1.47266214187524e-7			B9J08_004741	orf19.1449	DDI3	0	0.092045	-1.16123	-1.35772	3.18418e-05	6.68232	4.00165911352559e-7
B9J08_003404	NA	GIP2	0	0.284203	0.975668	1.15305	0.000155929	6.79944	3.04828e-06			B9J08_004730	MSK1	MSK1	0	0.383271	-0.689247	-0.911269	3.22912e-05	5.48592	4.12254907638319e-7
B9J08_000584	NA	GTS1	0	0.316856	0.967791	0.79946	0.00627678	6.30426	0.000403522			B9J08_000159	MSB2	MSB2	0	0.188411	-0.896757	-1.39428	3.30897e-05	7.02648	4.29050773266885e-7
B9J08_000849	ASR2	NA	0	-0.337825	0.959956	0.978533	1.29247184815011e-7	9.89378	4.89865651602875e-10			B9J08_004976	NA	NA	0	0.644091	-1.38049	-1.34176	3.38439e-05	5.30692	4.45580376103199e-7
B9J08_002174	NAA25	MDM20	0	-0.257148	0.952803	0.89117	1.58174e-05	5.30444	1.89316739444049e-7			B9J08_002730	NA	NA	0	0.118816	-0.769738	-1.05751	3.38774e-05	7.20811	4.52780085931994e-7
B9J08_001086	TRX1	TRX1	0	0.117542	0.943071	0.842189	5.31704e-05	7.28211	7.84881734151928e-7			B9J08_001239	NA	SVL3	0	0.156858	-0.878708	-1.0748	3.4649e-05	6.88018	4.70004776169343e-7
B9J08_001792	NA	NA	0	-0.475289	0.941712	1.12857	0.000275085	4.64268	6.74954e-06			B9J08_001131	NA	FRK1	0	0.300286	-1.14553	-1.28355	3.68859e-05	5.37835	5.15063626920606e-7
B9J08_001106	PRX1	PRX1	0	-0.0251185	0.930712	1.09715	3.03817e-06	8.02353	2.60605137200678e-8			B9J08_003624	DCK1	YLR422W	0	-0.0878216	-0.748921	-1.00911	3.83488e-05	6.05747	5.43140243337244e-7
B9J08_001590	NA	NA	0	-0.216572	0.886813	0.862002	0.00052197	12.2961	1.57064e-05			B9J08_003779	NA	SEM1	0	0.00429485	-0.59471	-0.529676	3.86641e-05	9.00655	5.5531895316083e-7
B9J08_002807	ARE2	ARE2	0	-0.0713732	0.884947	0.892616	0.000921018	5.13495	3.25195e-05			B9J08_004834	CDC10	CDC10	0	0.0128364	-0.623204	-0.799557	4.03467e-05	7.20221	5.87534754260169e-7
B9J08_004496	NA	YPR127W	0	0.0184004	0.879952	0.742287	0.000270554	7.04114	6.42098e-06			B9J08_000918	PHR1	GAS1	0	0.22646	-2.70782	-2.66824	5.3812e-05	4.88258	8.15821733338107e-7
B9J08_001854	NA	STP2	0	-0.0595389	0.87895	0.873231	0.00970273	7.01237	0.000756786			B9J08_001477	PRE1	PRE1	0	0.225411	-0.656216	-0.848204	5.63757e-05	6.91902	8.77180427417205e-7
B9J08_000483	HSP70	SSA4	0	-0.426195	0.876426	1.11109	0.000202399	9.63592	4.42225e-06			B9J08_001613	PHO100	NA	0	-0.088227	-1.90831	-1.64027	5.64817e-05	6.97328	8.90097165220436e-7
B9J08_001793	ALG6	ALG6	0	0.255178	0.8739	0.947239	0.0074043	4.6516	0.000503664			B9J08_001426	PGA54	NA	0	-0.221067	-0.946119	-1.70059	5.75223e-05	7.76084	9.17970708629355e-7
B9J08_004964	NA	YJL016W	0	0.11216	0.865587	0.767067	0.0082714	7.76887	0.000604517			B9J08_003094	NA	DBP10	0	0.044343	-0.818962	-1.31511	9.54767e-05	6.15397	1.63794e-06
B9J08_003067	WSC4	WSC4	0	0.071638	0.838461	0.932385	0.00894946	5.92389	0.000669469			B9J08_005437	orf19.6200	PRY2	0	0.0855859	-1.40792	-1.92025	9.54767e-05	8.07537	1.63688e-06
B9J08_001859	NA	FES1	0	-0.304111	0.830313	0.734178	0.000626742	7.19267	2.00037e-05			B9J08_002608	TPM2	TPM1	0	-0.039951	-0.633204	-0.974524	9.68548e-05	9.60733	1.6809e-06
B9J08_003306	TDH3	TDH2	0	0.15325	0.827523	1.41747	0.00227545	12.841	0.000103905			B9J08_002568	PRE6	PRE6	0	0.185559	-0.700865	-1.05021	0.000107359	7.72002	1.90603e-06
B9J08_002459	PIL1	LSP1	0	-0.232654	0.82536	0.671469	0.000114742	9.75779	2.15155e-06			B9J08_000443	BUD2	BUD2	0	-0.433202	-0.899475	-1.525	0.000109877	5.31104	1.97266e-06
B9J08_000493	NA	YBL029C-A	0	-0.415321	0.815105	0.839874	1.29604e-05	7.59734	1.49950806414152e-7			B9J08_000595	NA	NA	0	0.117159	-1.19436	-1.19697	0.000111746	5.87908	2.05079e-06
B9J08_002110	SIT1	ARN1	0	0.448135	0.805458	1.57134	0.000737758	6.48379	2.53131e-05			B9J08_001002	TOS1	TOS1	0	0.119144	-0.960052	-1.31089	0.000114742	10.1925	2.15088e-06
B9J08_003016	BMT8	NA	0	0.481322	0.803223	1.05214	0.000342918	8.38853	8.82433e-06			B9J08_000117	PGA31	NA	0	1.56236	-0.59367	-1.70014	0.000178542	1.38565	3.73965e-06
B9J08_003914	NA	SFK1	0	-0.115931	0.800748	0.898141	0.000484073	7.77859	1.32292e-05			B9J08_002891	CAT8	CAT8	0	-0.390507	-1.32982	-1.84384	0.000185183	4.95167	3.9157e-06
B9J08_002245	NA	YML131W	0	-0.393549	0.797852	1.0154	0.00513668	7.12368	0.000299204			B9J08_000857	PPS1	PPS1	0	-0.399004	-1.55863	-2.82157	0.000202399	2.87399	4.37076e-06
B9J08_003454	ADAEC	NA	0	-0.115631	0.794386	1.05301	0.00281623	9.32729	0.000135952			B9J08_003007	NA	NA	0	-0.21071	-1.13456	-1.72923	0.000233312	4.94987	5.21265e-06
B9J08_004672	NA	RPS22A	0	0.0181719	0.794076	1.1642	9.05906102681262e-8	8.2538	2.89138193554761e-10			B9J08_005183	NA	GOR1	0	-0.150227	-0.756976	-0.905713	0.0002388	6.25704	5.38289e-06
B9J08_000195	orf19.6681	SAY1	0	-0.21997	0.787323	0.817095	2.59955e-05	6.71004	3.2150793513819e-7			B9J08_000374	SMI1B	SMI1	0	0.102222	-0.987504	-1.39975	0.000274948	4.89971	6.69134e-06
B9J08_001084	NA	BXI1	0	0.128488	0.78713	0.746341	0.00156318	8.47824	6.48596e-05			B9J08_000466	NA	NA	0	0.206991	-0.768849	-0.98397	0.000310717	4.80088	7.75854e-06
B9J08_000494	PHO91	PHO91	0	0.0278185	0.783461	0.745198	0.0051319	5.18708	0.000297902			B9J08_005552	orf19.5711	CSR1	0	-0.0672892	-1.00556	-1.69146	0.000346207	7.50895	8.97803e-06
B9J08_005329	YIM1	YIM1	0	-0.0356172	0.7794	0.69761	5.33119e-06	7.06101	4.99832381463465e-8			B9J08_001458	RBT1	NA	0	0.148127	-1.51198	-2.42628	0.000351815	11.2063	9.19364e-06
B9J08_002039	NA	POF1	0	0.113844	0.77823	0.756164	6.86614e-05	6.71135	1.13682e-06			B9J08_004029	orf19.3854	SAT4	0	0.33745	-0.974517	-0.368871	0.000475518	4.71676	1.28057e-05
B9J08_002451	CDR4	PDR5	0	0.204022	0.773777	1.33055	0.000165382	7.14005	3.29907e-06			B9J08_001338	RPT1	RPT1	0	0.123967	-0.596074	-0.464093	0.00049165	7.52889	1.39009e-05
B9J08_000283	NA	NA	0	-0.0286897	0.767111	0.893439	8.29853e-06	7.48711	8.11147129777408e-8			B9J08_001703	BUD5	BUD5	0	0.0330027	-0.709418	-0.983673	0.00049165	5.97376	1.3938e-05
B9J08_002840	MSN4	MSN2	0	-0.152804	0.76429	0.905254	0.00453894	7.3154	0.000255333			B9J08_003051	BMT8	NA	0	0.0389961	-0.746354	-0.970391	0.00049165	6.22898	1.40658e-05
B9J08_005226	GLK1	GLK1	0	0.119877	0.751078	1.1147	0.000559001	10.8708	1.72841e-05			B9J08_002753	NA	NA	0	-0.042652	-0.933895	-1.74052	0.000500331	11.7664	1.4472e-05
B9J08_003642	NA	YET3	0	-0.0949086	0.739919	0.611067	0.00121015	8.24908	4.68319e-05			B9J08_001816	CHS7	CHS7	0	-0.089772	-0.65311	-0.8073	0.00052197	6.1359	1.53345e-05
B9J08_000437	NA	UBC13	0	-0.124447	0.73498	0.721579	0.000939407	5.6486	3.35435e-05			B9J08_001102	RSR1	RSR1	0	-0.0176197	-0.940281	-0.847951	0.000557924	6.2646	1.70903e-05
B9J08_001031	RBP1	FPR1	0	-0.221707	0.733688	0.713485	0.00049165	10.5851	1.39098e-05			B9J08_003912	SAP9	YPS1	0	-0.545804	-0.662975	-1.30975	0.000628687	7.50137	2.0442e-05
B9J08_003516	NA	DIF1	0	-0.180172	0.733058	0.739469	0.00145969	7.59077	5.96921e-05			B9J08_001079	WSC2	WSC2	0	-0.206516	-0.760117	-1.31085	0.000662174	5.44058	2.1663e-05
B9J08_000850	NA	AIF1	0	0.235983	0.732512	0.96393	0.000680044	7.88257	2.29259e-05			B9J08_000361	NA	NA	0	-0.220681	-1.19686	-2.60387	0.000673185	4.75511	2.23688e-05
B9J08_005545	RBT5	NA	0	0.403573	0.731375	1.75097	0.000201989	11.4742	4.31135e-06			B9J08_004902	NA	RGD2	0	0.185582	-1.04421	-1.10107	0.000717519	4.44753	2.44755e-05
B9J08_001404	NA	YPL109C	0	-0.0844518	0.724286	1.01973	1.19668e-05	6.20292	1.28792245034614e-7			B9J08_002843	NA	NA	0	0.139201	-0.918187	-1.04421	0.000758053	6.13909	2.61606e-05
B9J08_004567	NA	KSH1	0	-0.0924225	0.722918	0.738403	1.19668e-05	6.50741	1.28905872137649e-7			B9J08_004605	CDC11	CDC11	0	-0.114438	-0.709918	-0.781589	0.000841287	7.10194	2.93687e-05
B9J08_002666	AGP2	AGP2	0	-0.513968	0.715669	0.811832	0.000286698	6.01249	7.09168e-06			B9J08_000593	NA	BEM1	0	0.0908334	-1.12158	-2.08108	0.000926629	3.782	3.29025e-05
B9J08_001449	HMS1	HMS1	0	0.315643	0.711992	1.37319	0.000626742	6.88382	1.96073e-05			B9J08_002333	orf19.2252	NA	0	-0.659134	-1.44573	-2.83759	0.000994561	2.85942	3.65049e-05
B9J08_001896	NA	SRF1	0	-0.120257	0.705124	0.706577	0.000162228	7.72698	3.20378e-06			B9J08_000031	NAP1	NAP1	0	0.0698043	-0.676125	-0.896244	0.00100058	7.2611	3.69256e-05
B9J08_004892	HYR3	FLO5	0	1.71904	0.704077	-0.0601846	0.00708245	6.33873	0.000476119			B9J08_001366	PGA6	CCW12	0	0.0636165	-1.311	-1.37729	0.00106749	9.35247	4.00337e-05
B9J08_001544	NA	PER1	0	0.0459918	0.700167	0.81386	0.000143222	8.23442	2.73459e-06			B9J08_005077	CHS2	CHS1	0	-0.22008	-0.62925	-1.11444	0.00113132	6.23343	4.28789e-05
B9J08_001291	NA	TGL1	0	-0.131653	0.698079	0.761996	0.00170026	6.62062	7.29214e-05			B9J08_003435	PRE10	PRE10	0	-0.00800363	-0.719906	-0.753311	0.00120506	8.29114	4.63475e-05
B9J08_005283	NA	YOP1	0	0.0960871	0.69781	0.58322	0.00284335	9.94149	0.000137828			B9J08_004452	SNQ2	SNQ2	0	-0.0637541	-0.876255	-1.41896	0.00121684	7.48371	4.75766e-05
B9J08_000239	SFT2	SFT2	0	0.0175228	0.696131	0.81018	0.00285311	6.8326	0.000138871			B9J08_004089	RFG1	ROX1	0	0.0379278	-0.960543	-1.25956	0.00122369	7.63278	4.80882e-05
B9J08_002241	SIT1	ARN1	0	0.132508	0.695683	2.04526	0.00551257	5.41442	0.000328244			B9J08_003931	NA	NA	0	-0.430331	-0.630824	-0.97335	0.00140689	5.74976	5.69718e-05
B9J08_003695	RPS27	RPS27B	0	0.0346502	0.683741	0.734655	0.000557924	7.13398	1.71395e-05			B9J08_005356	SET1	SET1	0	0.30983	-1.02846	-0.818967	0.00153817	4.64967	6.3515e-05
B9J08_003110	NA	NA	0	-0.0988169	0.683283	0.701054	0.00052197	7.71289	1.52443e-05			B9J08_002353	orf19.1730	NA	0	0.114835	-0.586655	-0.919281	0.00183646	6.15746	7.94958e-05
B9J08_002194	NA	NYV1	0	-0.457628	0.677462	0.3498	0.00551257	4.90139	0.000329353			B9J08_000447	CRZ2	CRZ1	0	-0.00578799	-1.06316	-0.936974	0.00198124	6.50905	8.7739e-05
B9J08_004518	TRP99	AHP1	0	0.074007	0.67668	0.943473	3.64532e-05	8.15371	5.01749727329222e-7			B9J08_004580	NA	YPL199C	0	-0.0283252	-1.09224	-0.720168	0.0021107	5.45529	9.47352e-05
B9J08_004759	NA	ERV14	0	-0.0305408	0.672638	0.727131	0.000626742	8.70989	1.98471e-05			B9J08_000905	NA	REG1	0	0.547917	-1.35227	-1.6806	0.00214821	6.42999	9.68472e-05
B9J08_003682	NA	YKL151C	0	-0.106272	0.668348	0.66098	0.0012407	6.59236	4.92519e-05			B9J08_003957	MEA1	AFI1	0	-0.188683	-0.840421	-1.41414	0.00230036	4.112	0.000106001
B9J08_000150	NA	SHH3	0	-0.00605046	0.665789	0.572528	0.00719906	9.88828	0.000485395			B9J08_000244	orf19.577	YDL057W	0	-0.130708	-0.703286	-1.33632	0.00234423	4.98802	0.00010849
B9J08_001025	GSY1	GSY1	0	0.0462238	0.663187	0.925745	0.0030987	8.01773	0.000153297			B9J08_003429	RRS1	RRS1	0	-0.0941389	-0.765631	-0.560216	0.00246543	5.69495	0.000115083
B9J08_001227	TDH3	TDH3	0	-0.0755953	0.661925	0.570461	0.000215275	11.4284	4.76672e-06			B9J08_001465	DPP1	DPP1	0	-0.227633	-1.25032	-1.10896	0.00250493	4.73756	0.000117926
B9J08_005571	TNA1	TNA1	0	-1.45152	0.647093	0.75255	1.21094e-05	4.78057	1.32938921858192e-7			B9J08_000438	PGA30	NA	0	-1.07573	-1.03237	-1.18666	0.00372496	4.86006	0.000197654
B9J08_005154	NA	RTC2	0	-0.00485768	0.636764	0.444648	0.00590518	6.84773	0.000365389			B9J08_004900	orf19.5711	CSR1	0	-0.42613	-0.921607	-1.49352	0.00373381	7.14831	0.000199236
B9J08_000169	NA	SRX1	0	-0.125727	0.635759	1.0827	0.00627678	7.3987	0.000404428			B9J08_005044	YME1	YME1	0	-0.112503	-0.645724	-0.50064	0.00380852	9.08762	0.000205127
B9J08_000384	PHR2	GAS1	0	0.184399	0.628614	0.506219	0.00515867	9.38735	0.000302588			B9J08_003980	NA	EFM2	0	0.0745986	-0.915413	-1.05453	0.00432777	5.25406	0.000235683
B9J08_002889	CCR4	NGL1	0	0.203483	0.625295	0.713881	0.00279496	7.32755	0.00013381			B9J08_005418	RFC2	RFC2	0	0.0372533	-0.625882	-0.664292	0.0044832	6.30354	0.000249514
B9J08_001695	TPS1	TPS1	0	0.0948773	0.622249	0.409319	0.00113132	8.03656	4.28382e-05			B9J08_000112	PEX19	PEX19	0	-0.144507	-0.751009	-0.794627	0.00551257	7.31163	0.000329897
B9J08_000551	NA	VPS68	0	0.0062767	0.619168	0.612163	0.000148459	6.84365	2.87264e-06			B9J08_001080	NA	PIN2	0	-0.44657	-0.980984	-0.935824	0.00567067	5.57232	0.000343883
B9J08_004783	NA	SBE22	0	0.211048	0.612083	0.722513	0.00120506	5.94552	4.63948e-05			B9J08_004937	NA	NA	0	0.00815541	-0.650846	-0.582609	0.00568075	5.79168	0.000349027
B9J08_001850	ADE17	ADE17	0	0.103985	0.605583	0.634474	0.000327881	9.51175	8.37199e-06			B9J08_000391	NAT2	NAT2	0	0.0095944	-0.678786	-0.540038	0.00590518	5.9055	0.000366349
B9J08_002468	GPI19	GPI19	0	-0.276037	0.601216	0.625915	0.00749838	5.21524	0.00051455			B9J08_001906	NA	DIG2	0	0.157731	-0.804761	-0.896108	0.00593001	4.47183	0.000369073
B9J08_001809	SOU1	SPS19	0	0.119888	0.59951	0.70741	0.00052197	9.80079	1.57226e-05			B9J08_004871	NA	NA	0	0.374449	-0.707055	-0.621343	0.00682872	4.73551	0.000450889
B9J08_001696	NA	MDM36	0	-0.346105	0.597753	0.833078	0.00602591	6.24045	0.000377446			B9J08_000046	NA	UNG1	0	0.174701	-1.06182	-0.93118	0.00696907	4.66022	0.000462936
B9J08_003502	NA	SBH2	0	0.0187093	0.596368	0.695899	0.00143504	9.14243	5.83977e-05			B9J08_001985	orf19.1664	NA	0	0.611681	-0.655835	-0.26037	0.0073976	4.6429	0.000501733
B9J08_000445	NA	IBA57	0	-0.0828144	0.592085	0.806733	0.00897393	5.66336	0.000673089			B9J08_002723	NA	OPY1	0	-0.115289	-1.12712	-1.00944	0.00743123	5.13339	0.000507142
B9J08_001940	NA	HSP12	0	-0.148691	0.587351	0.484114	0.000249003	13.105	5.71221e-06			B9J08_002825	NA	NA	0	0.162009	-0.812768	-1.00636	0.00753011	11.7499	0.000523124
												B9J08_001004	NA	MAL13	0	-0.277765	-0.944871	-1.19274	0.00769086	4.36854	0.000541567
												B9J08_002599	NA	FMP25	0	0.0359714	-0.665273	-0.303093	0.00783604	6.13922	0.000558042
												B9J08_000417	CDC24	CDC24	0	-0.391176	-0.61498	-1.30067	0.00885377	5.27218	0.00065348
												B9J08_000088	NA	PAC10	0	0.0566026	-0.642244	-0.592818	0.00934224	6.89444	0.00071376
												B9J08_001314	NA	NA	0	0.0453952	-0.65043	-0.74805	0.0095852	5.77982	0.000738059
												B9J08_001930	AOX2	NA	0	-0.523787	-0.715346	-1.16374	0.00960837	10.2558	0.000741759
												B9J08_004601	RNR1	RNR1	0	0.343462	-0.737532	-0.453251	0.00968469	7.27383	0.000751515
												B9J08_004096	NA	LPX1	0	-0.173371	-0.76501	-0.99737	0.00999144	6.18217	0.000783291

## Sheet: Fig4E_UME6_up and down in Lac
cut-off of FDR < 0.01 and log2FC ± 0.585
UPREGULATED GENES IN LACTATE													DOWNREGULATED GENES IN LACTATE
Name	albicans_orthologue	cerevisiae_orthologue	470140_Wrinkled_Lactate	dbrg1_Lactate	dirf1_Lactate	dume6_Lactate	FDR	AveExpr	P value				Name	albicans_orthologue	cerevisiae_orthologue	470140_Wrinkled_Lactate	dbrg1_Lactate	dirf1_Lactate	dume6_Lactate	FDR	AveExpr	P value
B9J08_002372	NA	NA	0	0.27539	1.40118	1.55391	3.55624018271944e-9	7.87653	4.25642152330274e-12				B9J08_004110	IFF3	NA	0	0.91611	-5.07052	-4.80079	1.32367685484136e-12	6.86275	2.6404884397394e-16
B9J08_003550	YWP1	FLO5	0	-0.0285565	1.69705	1.78323	7.7929482790033e-8	11.3641	2.33182174715838e-10				B9J08_004946	HGC1	CLN2	0	0.322345	-1.54152	-3.75139	3.76259379164363e-10	6.67034	1.50113456678382e-13
B9J08_004672	NA	RPS22A	0	0.0181719	0.794076	1.1642	9.05906102681262e-8	8.2538	2.89138193554761e-10				B9J08_002529	BRG1	GAT2	0	-3.1362	-2.8445	-2.93377	2.18710323718634e-9	4.82094	1.74514521219736e-12
B9J08_000849	ASR2	NA	0	-0.337825	0.959956	0.978533	1.29247184815011e-7	9.89378	4.89865651602875e-10				B9J08_004729	BEM2	BEM2	0	-0.0665887	-1.11717	-1.67621	2.18710323718634e-9	6.58855	1.48342312957738e-12
B9J08_004825	NA	PIC2	0	0.149706	1.93287	2.08786	2.46634036887476e-7	7.37984	1.13157447604467e-9				B9J08_003251	XOG1	EXG1	0	0.163294	-1.21637	-1.93626	2.8907208809379e-9	8.93469	2.88322449724506e-12
B9J08_005018	CDC21	CDC21	0	-0.581042	2.03605	1.44477	6.51773331864142e-7	11.2218	3.64046544827369e-9				B9J08_002149	YPS7	YPS7	0	-0.446162	-1.17207	-1.97361	2.35643057872381e-8	5.78782	3.29044764633286e-11
B9J08_001932	ASR1	NA	0	-0.323635	1.57816	1.45669	9.96118334731105e-7	8.75522	6.35862491749359e-9				B9J08_000592	UME6	UME6	0	-0.115433	-1.22068	-5.47066	2.37057631920182e-8	6.07652	3.78308608689697e-11
B9J08_002356	NA	NA	0	0.625584	1.08604	1.27758	1.33419e-06	8.69593	1.02166142436343e-8				B9J08_000892	NA	NA	0	0.29341	-1.96958	-1.85327	2.38860924776293e-8	5.98613	4.28834694391908e-11
B9J08_003837	NAG1	NA	0	0.0423638	1.27128	1.75595	1.33419e-06	6.5809	9.62687501365173e-9				B9J08_004986	NA	YNL234W	0	1.05006	-1.06552	-0.840343	2.80283200860199e-8	5.79228	5.59112708677835e-11
B9J08_004667	NA	NA	0	-0.278757	1.16977	1.4604	1.74526e-06	7.97879	1.39258813436231e-8				B9J08_000024	NA	NA	0	-0.122036	-1.22585	-1.69988	4.73657575679198e-8	5.96482	1.0393443711293e-10
B9J08_000901	PDC11	PDC1	0	-0.252979	1.2689	1.39214	2.36246e-06	7.95792	1.93219065903405e-8				B9J08_000594	NA	NA	0	0.344509	-1.23769	-1.69264	7.74369828057665e-8	7.00787	2.16261272547523e-10
B9J08_001106	PRX1	PRX1	0	-0.0251185	0.930712	1.09715	3.03817e-06	8.02353	2.60605137200678e-8				B9J08_002560	RBR2	TIP1	0	-0.246345	-1.22554	-1.60032	7.74369828057665e-8	8.50279	2.14863439418894e-10
B9J08_005329	YIM1	YIM1	0	-0.0356172	0.7794	0.69761	5.33119e-06	7.06101	4.99832381463465e-8				B9J08_003950	TEC1	TEC1	0	0.674944	-1.838	-1.87537	7.74369828057665e-8	7.6806	1.86274397539684e-10
B9J08_004698	NA	YHR131C	0	0.00242485	1.28446	1.33854	6.08799e-06	7.32449	5.8293183026189e-8				B9J08_000266	NA	NA	0	0.397464	-2.49439	-3.47046	9.76557251158168e-8	5.42871	3.39529485089347e-10
B9J08_000283	NA	NA	0	-0.0286897	0.767111	0.893439	8.29853e-06	7.48711	8.11147129777408e-8				B9J08_001936	NA	AMF1	0	0.21646	-1.56423	-2.2923	9.76557251158168e-8	6.44753	3.50648923216577e-10
B9J08_003397	ATC1	ATH1	0	-0.294603	1.51964	1.49062	8.82262e-06	7.63651	8.79973833036681e-8				B9J08_004787	NA	CMR3	0	0.259541	-4.71487	-1.39566	1.77475251896516e-7	6.09638	7.08060051452287e-10
B9J08_001404	NA	YPL109C	0	-0.0844518	0.724286	1.01973	1.19668e-05	6.20292	1.28792245034614e-7				B9J08_002465	SIT1	ARN1	0	0.110364	-5.46625	-2.0134	2.02651072577929e-7	4.86213	8.48927293863256e-10
B9J08_004567	NA	KSH1	0	-0.0924225	0.722918	0.738403	1.19668e-05	6.50741	1.28905872137649e-7				B9J08_003109	NA	NA	0	-0.251386	-1.17337	-3.55284	2.32301013828174e-7	5.60809	1.01947382888886e-9
B9J08_002118	NA	NA	0	0.106051	1.6205	1.7881	1.21094e-05	8.56197	1.35273840403148e-7				B9J08_004135	WOR4	NA	0	0.362279	-2.73879	-3.55605	3.77575356320784e-7	2.77125	1.80766178968658e-9
B9J08_005571	TNA1	TNA1	0	-1.45152	0.647093	0.75255	1.21094e-05	4.78057	1.32938921858192e-7				B9J08_002295	NA	NA	0	-0.915567	-4.02143	-4.99774	4.62742359658445e-7	3.72646	2.40002021765801e-9
B9J08_005227	NA	NA	0	0.00642515	1.01844	1.03283	1.29517e-05	7.14247	1.47266214187524e-7				B9J08_002376	NA	DML1	0	0.494654	-0.873539	-1.27372	4.62742359658445e-7	5.47984	2.39071698492223e-9
B9J08_000493	NA	YBL029C-A	0	-0.415321	0.815105	0.839874	1.29604e-05	7.59734	1.49950806414152e-7				B9J08_000389	NA	NA	0	-2.53005	-0.291222	-3.38902	5.95010432936132e-7	6.18247	3.2047240553113e-9
B9J08_002174	NAA25	MDM20	0	-0.257148	0.952803	0.89117	1.58174e-05	5.30444	1.89316739444049e-7				B9J08_001511	LMO1	YLL007C	0	0.0820165	-1.34876	-1.05082	8.36054107613224e-7	5.13605	5.10250241448249e-9
B9J08_004925	NA	RBD2	0	0.139491	0.555408	0.694195	1.72558e-05	7.09938	2.09974728880348e-7				B9J08_002660	HGT17	HXT8	0	-0.519641	-2.61109	-1.37929	8.36054107613224e-7	5.44926	5.17009322481746e-9
B9J08_000195	orf19.6681	SAY1	0	-0.21997	0.787323	0.817095	2.59955e-05	6.71004	3.2150793513819e-7				B9J08_004410	CRH11	CRH1	0	-0.774711	-1.0324	-1.58108	8.36054107613224e-7	8.20741	4.94831823275579e-9
B9J08_004518	TRP99	AHP1	0	0.074007	0.67668	0.943473	3.64532e-05	8.15371	5.01749727329222e-7				B9J08_002055	NA	NA	0	0.204571	-1.89009	-2.46211	1.20289e-06	8.12949	8.12551573707427e-9
B9J08_001086	TRX1	TRX1	0	0.117542	0.943071	0.842189	5.31704e-05	7.28211	7.84881734151928e-7				B9J08_002176	NA	YBR138C	0	-0.0695768	-0.551097	-1.52816	1.20289e-06	5.95779	8.15841837580777e-9
B9J08_004893	orf19.3232	TNA1	0	0.0677484	2.06149	2.84512	5.42784e-05	4.93594	8.33719244349087e-7				B9J08_000268	GCF1	NA	0	0.0310739	-0.691672	-1.10991	1.33419e-06	8.84958	1.02295099124705e-8
B9J08_002882	TFS1	TFS1	0	0.151785	0.584766	0.822806	5.94269e-05	7.92082	9.60218551212034e-7				B9J08_003359	CDC3	CDC3	0	0.0179587	-0.833165	-1.29332	1.33419e-06	8.26767	9.92371752581396e-9
B9J08_002342	NDE1	NDE1	0	0.00211161	0.573481	0.605742	6.46172e-05	8.76264	1.05697e-06				B9J08_004498	ALS1	SAG1	0	-0.805364	-1.74024	-6.00823	1.33419e-06	6.27734	1.03796908205871e-8
B9J08_002039	NA	POF1	0	0.113844	0.77823	0.756164	6.86614e-05	6.71135	1.13682e-06				B9J08_005424	KCH1	KCH1	0	-0.0224571	-1.28529	-1.29253	2.78249e-06	6.46739	2.3312301964749e-8
B9J08_001677	STV1	STV1	0	0.163654	0.581338	0.828576	0.000110771	6.46241	2.01081e-06				B9J08_000187	ARF3	ARF3	0	0.0495376	-1.02341	-1.84965	3.10066e-06	7.13191	2.76567933772062e-8
B9J08_002459	PIL1	LSP1	0	-0.232654	0.82536	0.671469	0.000114742	9.75779	2.15155e-06				B9J08_002280	GAP4	SAM3	0	-0.253398	-1.35637	-1.69804	3.10066e-06	7.90575	2.78335935757103e-8
B9J08_001544	NA	PER1	0	0.0459918	0.700167	0.81386	0.000143222	8.23442	2.73459e-06				B9J08_005421	SAP3	YPS3	0	-0.224944	-1.62403	-1.96172	4.50021e-06	5.27852	4.12945259364736e-8
B9J08_002958	orf19.6874	NA	0	0.146659	0.528266	0.744238	0.000143222	6.49389	2.74273e-06				B9J08_005443	NA	PAA1	0	-0.133614	-0.811036	-1.01675	1.09557e-05	8.35397	1.11458018758177e-7
B9J08_000551	NA	VPS68	0	0.0062767	0.619168	0.612163	0.000148459	6.84365	2.87264e-06				B9J08_003788	NA	YEL1	0	-0.126601	-0.904306	-1.55788	1.19668e-05	5.49677	1.25431214833052e-7
B9J08_003404	NA	GIP2	0	0.284203	0.975668	1.15305	0.000155929	6.79944	3.04828e-06				B9J08_001287	NA	NA	0	-0.651953	-1.32282	-2.2249	1.38367e-05	5.29045	1.62850173979153e-7
B9J08_001896	NA	SRF1	0	-0.120257	0.705124	0.706577	0.000162228	7.72698	3.20378e-06				B9J08_004741	orf19.1449	DDI3	0	0.092045	-1.16123	-1.35772	3.18418e-05	6.68232	4.00165911352559e-7
B9J08_002451	CDR4	PDR5	0	0.204022	0.773777	1.33055	0.000165382	7.14005	3.29907e-06				B9J08_004730	MSK1	MSK1	0	0.383271	-0.689247	-0.911269	3.22912e-05	5.48592	4.12254907638319e-7
B9J08_000476	HSP104	HSP104	0	-0.33411	1.03535	1.32597	0.000167704	9.05707	3.42635e-06				B9J08_000159	MSB2	MSB2	0	0.188411	-0.896757	-1.39428	3.30897e-05	7.02648	4.29050773266885e-7
B9J08_001407	NA	ERD2	0	-0.132463	0.526083	0.726774	0.000178542	5.27037	3.71824e-06				B9J08_004976	NA	NA	0	0.644091	-1.38049	-1.34176	3.38439e-05	5.30692	4.45580376103199e-7
B9J08_005545	RBT5	NA	0	0.403573	0.731375	1.75097	0.000201989	11.4742	4.31135e-06				B9J08_002730	NA	NA	0	0.118816	-0.769738	-1.05751	3.38774e-05	7.20811	4.52780085931994e-7
B9J08_000483	HSP70	SSA4	0	-0.426195	0.876426	1.11109	0.000202399	9.63592	4.42225e-06				B9J08_001239	NA	SVL3	0	0.156858	-0.878708	-1.0748	3.4649e-05	6.88018	4.70004776169343e-7
B9J08_004444	NA	NA	0	0.473502	0.38573	2.28842	0.000202399	4.36109	4.44124e-06				B9J08_001131	NA	FRK1	0	0.300286	-1.14553	-1.28355	3.68859e-05	5.37835	5.15063626920606e-7
B9J08_000030	NA	NA	0	0.148337	1.90023	2.17378	0.000240964	5.595	5.47974e-06				B9J08_003624	DCK1	YLR422W	0	-0.0878216	-0.748921	-1.00911	3.83488e-05	6.05747	5.43140243337244e-7
B9J08_000050	KRE9	KRE9	0	-0.0756634	1.51559	1.40011	0.000249395	2.1612	5.77096e-06				B9J08_004834	CDC10	CDC10	0	0.0128364	-0.623204	-0.799557	4.03467e-05	7.20221	5.87534754260169e-7
B9J08_005229	NA	FMN1	0	0.129336	0.446505	0.701255	0.000259253	6.61553	6.05079e-06				B9J08_000918	PHR1	GAS1	0	0.22646	-2.70782	-2.66824	5.3812e-05	4.88258	8.15821733338107e-7
B9J08_004496	NA	YPR127W	0	0.0184004	0.879952	0.742287	0.000270554	7.04114	6.42098e-06				B9J08_001477	PRE1	PRE1	0	0.225411	-0.656216	-0.848204	5.63757e-05	6.91902	8.77180427417205e-7
B9J08_000645	TSA1	TSA1	0	-0.19179	0.543268	0.928858	0.000274237	10.0093	6.61933e-06				B9J08_001613	PHO100	NA	0	-0.088227	-1.90831	-1.64027	5.64817e-05	6.97328	8.90097165220436e-7
B9J08_001792	NA	NA	0	-0.475289	0.941712	1.12857	0.000275085	4.64268	6.74954e-06				B9J08_001426	PGA54	NA	0	-0.221067	-0.946119	-1.70059	5.75223e-05	7.76084	9.17970708629355e-7
B9J08_002666	AGP2	AGP2	0	-0.513968	0.715669	0.811832	0.000286698	6.01249	7.09168e-06				B9J08_002406	PRE3	PRE3	0	0.222072	-0.463523	-0.591389	8.16505e-05	9.01983	1.36817e-06
B9J08_001850	ADE17	ADE17	0	0.103985	0.605583	0.634474	0.000327881	9.51175	8.37199e-06				B9J08_003094	NA	DBP10	0	0.044343	-0.818962	-1.31511	9.54767e-05	6.15397	1.63794e-06
B9J08_003016	BMT8	NA	0	0.481322	0.803223	1.05214	0.000342918	8.38853	8.82433e-06				B9J08_005437	orf19.6200	PRY2	0	0.0855859	-1.40792	-1.92025	9.54767e-05	8.07537	1.63688e-06
B9J08_002694	NA	PET18	0	-0.104381	1.29497	1.62593	0.000378723	7.33545	9.97235e-06				B9J08_002608	TPM2	TPM1	0	-0.039951	-0.633204	-0.974524	9.68548e-05	9.60733	1.6809e-06
B9J08_000519	DPM2	NA	0	-0.244503	0.434083	0.656323	0.000392602	7.64109	1.04161e-05				B9J08_002568	PRE6	PRE6	0	0.185559	-0.700865	-1.05021	0.000107359	7.72002	1.90603e-06
B9J08_003568	GCY1	GCY1	0	2.09179	3.73979	3.74431	0.000458021	1.47564	1.22431e-05				B9J08_003015	orf19.1433	LPX1	0	-0.09928	-0.486958	-1.83165	0.000107359	4.52595	1.89859e-06
B9J08_003914	NA	SFK1	0	-0.115931	0.800748	0.898141	0.000484073	7.77859	1.32292e-05				B9J08_000443	BUD2	BUD2	0	-0.433202	-0.899475	-1.525	0.000109877	5.31104	1.97266e-06
B9J08_001031	RBP1	FPR1	0	-0.221707	0.733688	0.713485	0.00049165	10.5851	1.39098e-05				B9J08_000595	NA	NA	0	0.117159	-1.19436	-1.19697	0.000111746	5.87908	2.05079e-06
B9J08_001784	NA	VMA16	0	-0.0633944	0.562612	0.611555	0.00049165	7.26168	1.39593e-05				B9J08_001002	TOS1	TOS1	0	0.119144	-0.960052	-1.31089	0.000114742	10.1925	2.15088e-06
B9J08_004239	LAG1	LAG1	0	-0.0177717	0.365615	0.618509	0.00049165	7.85361	1.41228e-05				B9J08_000890	NA	NA	0	-0.0635721	-0.569858	-0.965392	0.000167704	11.0259	3.44574e-06
B9J08_001590	NA	NA	0	-0.216572	0.886813	0.862002	0.00052197	12.2961	1.57064e-05				B9J08_003050	SMP2	PAH1	0	0.169997	-0.238006	-1.09915	0.000167704	7.08905	3.42845e-06
B9J08_001809	SOU1	SPS19	0	0.119888	0.59951	0.70741	0.00052197	9.80079	1.57226e-05				B9J08_000117	PGA31	NA	0	1.56236	-0.59367	-1.70014	0.000178542	1.38565	3.73965e-06
B9J08_003110	NA	NA	0	-0.0988169	0.683283	0.701054	0.00052197	7.71289	1.52443e-05				B9J08_002891	CAT8	CAT8	0	-0.390507	-1.32982	-1.84384	0.000185183	4.95167	3.9157e-06
B9J08_004015	GCA1	ROT2	0	-0.269455	0.571928	0.809929	0.00052197	6.72538	1.55633e-05				B9J08_000857	PPS1	PPS1	0	-0.399004	-1.55863	-2.82157	0.000202399	2.87399	4.37076e-06
B9J08_005114	SRR1	SKN7	0	0.142795	2.20446	2.46548	0.00052197	5.44816	1.57209e-05				B9J08_003007	NA	NA	0	-0.21071	-1.13456	-1.72923	0.000233312	4.94987	5.21265e-06
B9J08_002729	NA	NA	0	-0.206076	0.547155	0.661559	0.000540355	8.73193	1.63842e-05				B9J08_005183	NA	GOR1	0	-0.150227	-0.756976	-0.905713	0.0002388	6.25704	5.38289e-06
B9J08_003695	RPS27	RPS27B	0	0.0346502	0.683741	0.734655	0.000557924	7.13398	1.71395e-05				B9J08_000613	GLT1	GLT1	0	0.113122	-0.537416	-1.04913	0.000270554	6.66805	6.42249e-06
B9J08_005226	GLK1	GLK1	0	0.119877	0.751078	1.1147	0.000559001	10.8708	1.72841e-05				B9J08_000374	SMI1B	SMI1	0	0.102222	-0.987504	-1.39975	0.000274948	4.89971	6.69134e-06
B9J08_001449	HMS1	HMS1	0	0.315643	0.711992	1.37319	0.000626742	6.88382	1.96073e-05				B9J08_000466	NA	NA	0	0.206991	-0.768849	-0.98397	0.000310717	4.80088	7.75854e-06
B9J08_001859	NA	FES1	0	-0.304111	0.830313	0.734178	0.000626742	7.19267	2.00037e-05				B9J08_002526	CUE5	CUE5	0	0.0195068	-0.53303	-0.628101	0.000327881	8.69216	8.31051e-06
B9J08_004759	NA	ERV14	0	-0.0305408	0.672638	0.727131	0.000626742	8.70989	1.98471e-05				B9J08_005552	orf19.5711	CSR1	0	-0.0672892	-1.00556	-1.69146	0.000346207	7.50895	8.97803e-06
B9J08_000850	NA	AIF1	0	0.235983	0.732512	0.96393	0.000680044	7.88257	2.29259e-05				B9J08_001458	RBT1	NA	0	0.148127	-1.51198	-2.42628	0.000351815	11.2063	9.19364e-06
B9J08_002110	SIT1	ARN1	0	0.448135	0.805458	1.57134	0.000737758	6.48379	2.53131e-05				B9J08_002366	CCP1	CCP1	0	0.279608	-0.550779	-1.32968	0.000484073	7.16972	1.32189e-05
B9J08_002807	ARE2	ARE2	0	-0.0713732	0.884947	0.892616	0.000921018	5.13495	3.25195e-05				B9J08_002442	NA	UPS1	0	0.153799	-0.346027	-0.668356	0.00049012	6.24727	1.34922e-05
B9J08_000437	NA	UBC13	0	-0.124447	0.73498	0.721579	0.000939407	5.6486	3.35435e-05				B9J08_001703	BUD5	BUD5	0	0.0330027	-0.709418	-0.983673	0.00049165	5.97376	1.3938e-05
B9J08_000185	RPS7A	RPS7A	0	-0.21415	0.501042	0.630221	0.000980436	9.97632	3.55953e-05				B9J08_003051	BMT8	NA	0	0.0389961	-0.746354	-0.970391	0.00049165	6.22898	1.40658e-05
B9J08_001951	CSA1	NA	0	0.993275	0.15203	0.911708	0.000980436	9.66428	3.54632e-05				B9J08_002753	NA	NA	0	-0.042652	-0.933895	-1.74052	0.000500331	11.7664	1.4472e-05
B9J08_002122	PNC1	PNC1	0	-0.09543	0.539104	0.732954	0.000984572	8.12931	3.59419e-05				B9J08_001816	CHS7	CHS7	0	-0.089772	-0.65311	-0.8073	0.00052197	6.1359	1.53345e-05
B9J08_001853	NA	FMP52	0	-0.15147	1.07873	0.847523	0.00103181	9.54045	3.82836e-05				B9J08_001102	RSR1	RSR1	0	-0.0176197	-0.940281	-0.847951	0.000557924	6.2646	1.70903e-05
B9J08_004019	NA	YPL264C	0	-0.34762	1.0285	1.08732	0.00103233	4.43711	3.85092e-05				B9J08_002829	DBF2	DBF2	0	0.308612	-0.506127	-0.603184	0.000628558	6.50934	2.03125e-05
B9J08_001659	NA	NA	0	-0.241694	0.551061	0.758997	0.00113663	7.68503	4.33065e-05				B9J08_003912	SAP9	YPS1	0	-0.545804	-0.662975	-1.30975	0.000628687	7.50137	2.0442e-05
B9J08_004783	NA	SBE22	0	0.211048	0.612083	0.722513	0.00120506	5.94552	4.63948e-05				B9J08_001079	WSC2	WSC2	0	-0.206516	-0.760117	-1.31085	0.000662174	5.44058	2.1663e-05
B9J08_003642	NA	YET3	0	-0.0949086	0.739919	0.611067	0.00121015	8.24908	4.68319e-05				B9J08_000361	NA	NA	0	-0.220681	-1.19686	-2.60387	0.000673185	4.75511	2.23688e-05
B9J08_004838	PST3	PST2	0	-0.576288	1.21491	1.19534	0.00121297	9.80488	4.71833e-05				B9J08_000759	orf19.2149	YPR003C	0	-0.107277	-0.522417	-1.35692	0.000673185	5.19295	2.24261e-05
B9J08_003682	NA	YKL151C	0	-0.106272	0.668348	0.66098	0.0012407	6.59236	4.92519e-05				B9J08_004902	NA	RGD2	0	0.185582	-1.04421	-1.10107	0.000717519	4.44753	2.44755e-05
B9J08_003885	MIT1	SUR1	0	-0.200358	0.463327	0.72472	0.00132	6.08789	5.29264e-05				B9J08_002843	NA	NA	0	0.139201	-0.918187	-1.04421	0.000758053	6.13909	2.61606e-05
B9J08_003502	NA	SBH2	0	0.0187093	0.596368	0.695899	0.00143504	9.14243	5.83977e-05				B9J08_000831	NA	KHA1	0	0.0483269	-0.576895	-1.1342	0.000810289	6.59574	2.81249e-05
B9J08_003516	NA	DIF1	0	-0.180172	0.733058	0.739469	0.00145969	7.59077	5.96921e-05				B9J08_004605	CDC11	CDC11	0	-0.114438	-0.709918	-0.781589	0.000841287	7.10194	2.93687e-05
B9J08_001153	NA	RTC3	0	0.0500196	0.536177	0.70032	0.00146419	10.2785	6.01682e-05				B9J08_000512	NA	YBR096W	0	-0.217334	-0.21131	-0.71988	0.000876763	8.78099	3.0782e-05
B9J08_001084	NA	BXI1	0	0.128488	0.78713	0.746341	0.00156318	8.47824	6.48596e-05				B9J08_000593	NA	BEM1	0	0.0908334	-1.12158	-2.08108	0.000926629	3.782	3.29025e-05
B9J08_003152	IST2	IST2	0	-0.00901989	0.519962	0.647686	0.00159286	7.76911	6.67267e-05				B9J08_002333	orf19.2252	NA	0	-0.659134	-1.44573	-2.83759	0.000994561	2.85942	3.65049e-05
B9J08_001291	NA	TGL1	0	-0.131653	0.698079	0.761996	0.00170026	6.62062	7.29214e-05				B9J08_000031	NAP1	NAP1	0	0.0698043	-0.676125	-0.896244	0.00100058	7.2611	3.69256e-05
B9J08_004026	NA	COS111	0	-0.316535	0.527896	0.680074	0.00188417	6.43992	8.19368e-05				B9J08_001366	PGA6	CCW12	0	0.0636165	-1.311	-1.37729	0.00106749	9.35247	4.00337e-05
B9J08_004101	NA	NA	0	-0.168624	1.45941	1.90899	0.0019512	6.1937	8.52409e-05				B9J08_005077	CHS2	CHS1	0	-0.22008	-0.62925	-1.11444	0.00113132	6.23343	4.28789e-05
B9J08_001550	orf19.867	AIM14	0	0.626242	-0.117785	3.73429	0.00200097	0.585597	8.90119e-05				B9J08_003435	PRE10	PRE10	0	-0.00800363	-0.719906	-0.753311	0.00120506	8.29114	4.63475e-05
B9J08_003306	TDH3	TDH2	0	0.15325	0.827523	1.41747	0.00227545	12.841	0.000103905				B9J08_004452	SNQ2	SNQ2	0	-0.0637541	-0.876255	-1.41896	0.00121684	7.48371	4.75766e-05
B9J08_000029	PCL5	PCL5	0	-0.232832	0.580077	0.797364	0.00242871	7.15448	0.000112884				B9J08_004089	RFG1	ROX1	0	0.0379278	-0.960543	-1.25956	0.00122369	7.63278	4.80882e-05
B9J08_003182	NA	PCF11	0	0.263868	0.457067	0.887099	0.002515	5.72929	0.000118902				B9J08_000945	2007-09-01	SHS1	0	-0.0339161	-0.533702	-0.598578	0.00137221	6.38527	5.52934e-05
B9J08_004770	NA	NA	0	-0.315846	1.29002	1.07316	0.00254454	4.59736	0.000121314				B9J08_003931	NA	NA	0	-0.430331	-0.630824	-0.97335	0.00140689	5.74976	5.69718e-05
B9J08_002889	CCR4	NGL1	0	0.203483	0.625295	0.713881	0.00279496	7.32755	0.00013381				B9J08_005356	SET1	SET1	0	0.30983	-1.02846	-0.818967	0.00153817	4.64967	6.3515e-05
B9J08_003454	ADAEC	NA	0	-0.115631	0.794386	1.05301	0.00281623	9.32729	0.000135952				B9J08_002751	NA	NA	0	0.220822	-0.544586	-0.660968	0.00159286	6.79438	6.64816e-05
B9J08_000239	SFT2	SFT2	0	0.0175228	0.696131	0.81018	0.00285311	6.8326	0.000138871				B9J08_004004	NA	TED1	0	-0.0027521	-0.511768	-0.665882	0.00159351	6.30933	6.73898e-05
B9J08_000449	GAP6	GAP1	0	0.0463809	0.39908	0.694483	0.00291441	7.05603	0.000143017				B9J08_001210	NA	YDR090C	0	-0.161964	-0.463701	-0.696519	0.00178154	6.85811	7.67628e-05
B9J08_001025	GSY1	GSY1	0	0.0462238	0.663187	0.925745	0.0030987	8.01773	0.000153297				B9J08_002353	orf19.1730	NA	0	0.114835	-0.586655	-0.919281	0.00183646	6.15746	7.94958e-05
B9J08_005200	NA	NA	0	-0.164048	0.392075	0.593562	0.00313982	8.69771	0.000157149				B9J08_002011	NA	FMO1	0	-0.0176872	-0.247738	-0.832324	0.0019599	6.09759	8.6403e-05
B9J08_005561	NA	NA	0	-0.372741	1.03956	1.90554	0.00334222	2.254	0.000170011				B9J08_002830	AYR2	AYR1	0	0.313507	-0.551158	-1.1091	0.0019599	8.4771	8.60519e-05
B9J08_000210	NA	NA	0	-0.0166088	1.46224	1.11563	0.00351541	6.68523	0.000180224				B9J08_000447	CRZ2	CRZ1	0	-0.00578799	-1.06316	-0.936974	0.00198124	6.50905	8.7739e-05
B9J08_001714	NA	NA	0	0.0361041	1.19032	1.55848	0.00433581	3.97906	0.000237452				B9J08_004580	NA	YPL199C	0	-0.0283252	-1.09224	-0.720168	0.0021107	5.45529	9.47352e-05
B9J08_002119	NA	NA	0	0.125741	1.24622	1.75087	0.00447543	4.97542	0.000247296				B9J08_000905	NA	REG1	0	0.547917	-1.35227	-1.6806	0.00214821	6.42999	9.68472e-05
B9J08_002840	MSN4	MSN2	0	-0.152804	0.76429	0.905254	0.00453894	7.3154	0.000255333				B9J08_002547	NA	MGR3	0	0.28578	-0.335611	-0.595659	0.00227545	6.45937	0.000103945
B9J08_004171	TYE7	TYE7	0	0.0885557	1.17668	1.60561	0.00486946	9.61763	0.000276839				B9J08_003957	MEA1	AFI1	0	-0.188683	-0.840421	-1.41414	0.00230036	4.112	0.000106001
B9J08_001090	TRR1	TRR1	0	-0.278621	0.11243	0.736076	0.00493903	8.923	0.000282765				B9J08_000244	orf19.577	YDL057W	0	-0.130708	-0.703286	-1.33632	0.00234423	4.98802	0.00010849
B9J08_000494	PHO91	PHO91	0	0.0278185	0.783461	0.745198	0.0051319	5.18708	0.000297902				B9J08_001465	DPP1	DPP1	0	-0.227633	-1.25032	-1.10896	0.00250493	4.73756	0.000117926
B9J08_002245	NA	YML131W	0	-0.393549	0.797852	1.0154	0.00513668	7.12368	0.000299204				B9J08_002991	NA	YML079W	0	-0.340399	-0.542884	-1.05503	0.00254454	6.96479	0.000121188
B9J08_004441	NA	YDL073W	0	-0.0997664	0.556548	0.674295	0.00531927	6.54614	0.000314673				B9J08_003286	orf19.7042	NA	0	0.405238	-0.536919	-1.02091	0.00286706	6.02972	0.000140122
B9J08_002241	SIT1	ARN1	0	0.132508	0.695683	2.04526	0.00551257	5.41442	0.000328244				B9J08_004499	TUB1	TUB1	0	0.0599478	-0.451594	-0.706962	0.00313982	8.71997	0.00015721
B9J08_001696	NA	MDM36	0	-0.346105	0.597753	0.833078	0.00602591	6.24045	0.000377446				B9J08_001143	HEM15	HEM15	0	-0.375916	-0.0892687	-0.621339	0.00315753	8.76147	0.000158727
B9J08_003838	DAC1	NA	0	0.152677	1.1015	1.438	0.00624316	4.34885	0.000397281				B9J08_002969	YPT52	YPT52	0	0.170627	-0.325885	-0.901178	0.0033995	7.55724	0.000173603
B9J08_000169	NA	SRX1	0	-0.125727	0.635759	1.0827	0.00627678	7.3987	0.000404428				B9J08_003426	SIN3	SIN3	0	-0.00232222	-0.327257	-0.843698	0.00353969	6.84817	0.000182174
B9J08_000584	NA	GTS1	0	0.316856	0.967791	0.79946	0.00627678	6.30426	0.000403522				B9J08_000626	NA	NA	0	0.0101378	-0.418067	-1.09803	0.00359468	4.85766	0.000189307
B9J08_005232	NA	BUL1	0	-0.165096	0.429308	0.683148	0.00644111	6.54799	0.000420156				B9J08_003175	NA	BOP3	0	0.225741	-0.208159	-0.627806	0.00359468	5.56832	0.000189124
B9J08_001852	NA	STP2	0	-0.431729	1.08136	1.41926	0.00705226	7.67382	0.000471276				B9J08_003471	RAX2	RAX2	0	-0.0443315	-0.3622	-0.959245	0.00359468	5.43603	0.000188806
B9J08_003887	NA	NA	0	-0.0823242	0.511585	0.863084	0.00707003	6.66896	0.000473874				B9J08_000438	PGA30	NA	0	-1.07573	-1.03237	-1.18666	0.00372496	4.86006	0.000197654
B9J08_001793	ALG6	ALG6	0	0.255178	0.8739	0.947239	0.0074043	4.6516	0.000503664				B9J08_001935	MNN2	MNN2	0	0.246337	-0.224879	-0.744058	0.00372496	6.07911	0.000197456
B9J08_002468	GPI19	GPI19	0	-0.276037	0.601216	0.625915	0.00749838	5.21524	0.00051455				B9J08_004900	orf19.5711	CSR1	0	-0.42613	-0.921607	-1.49352	0.00373381	7.14831	0.000199236
B9J08_001969	NA	NA	0	0.0459984	0.391172	0.825836	0.00753011	6.69001	0.000521569				B9J08_004749	SSN6	CYC8	0	-0.043087	-0.345227	-0.809299	0.00375405	6.57829	0.000201444
B9J08_004913	NA	BPT1	0	0.0227245	0.564985	0.684815	0.00753011	5.78649	0.000524238				B9J08_003980	NA	EFM2	0	0.0745986	-0.915413	-1.05453	0.00432777	5.25406	0.000235683
B9J08_003908	SIT1	SIT1	0	0.289565	1.24615	2.74802	0.00812034	3.09783	0.000582824				B9J08_001125	SNQ2	SNQ2	0	0.110798	-0.452524	-0.846164	0.00433581	8.55603	0.000237851
B9J08_001459	NA	NA	0	-0.541463	0.0138489	0.863983	0.00813239	3.2307	0.000585636				B9J08_000074	RTS1	RTS1	0	-0.16772	-0.375173	-0.658974	0.00444226	7.50942	0.000244577
B9J08_001860	PGK1	PGK1	0	0.0272006	0.512361	0.67875	0.00819818	11.6378	0.000594583				B9J08_005418	RFC2	RFC2	0	0.0372533	-0.625882	-0.664292	0.0044832	6.30354	0.000249514
B9J08_005063	NA	NA	0	0.228794	2.07698	2.43566	0.00819818	4.74456	0.000595279				B9J08_002920	NA	GRX7	0	0.323148	-0.459464	-0.689219	0.00451794	5.85822	0.000252349
B9J08_004197	PRS5	PRS5	0	0.107385	0.461203	0.716182	0.0082714	5.92485	0.000605546				B9J08_004505	NA	FAR8	0	-0.245537	-0.317765	-0.72918	0.00493903	6.14347	0.000281797
B9J08_004964	NA	YJL016W	0	0.11216	0.865587	0.767067	0.0082714	7.76887	0.000604517				B9J08_001861	FAT1	FAT1	0	0.263427	-0.453783	-0.791282	0.00506411	5.76697	0.000290936
B9J08_000463	NA	VFA1	0	0.260548	0.376466	0.708076	0.00849203	7.34847	0.000625087				B9J08_000815	NA	SPT8	0	0.286726	-0.0166989	-0.76975	0.00515867	4.97597	0.000303572
B9J08_000522	NA	DIA4	0	0.174647	0.281709	0.783003	0.00894417	5.81932	0.000665505				B9J08_000112	PEX19	PEX19	0	-0.144507	-0.751009	-0.794627	0.00551257	7.31163	0.000329897
B9J08_003067	WSC4	WSC4	0	0.071638	0.838461	0.932385	0.00894946	5.92389	0.000669469				B9J08_003103	SER1	SER1	0	-0.3085	-0.336972	-0.94004	0.00555476	6.535	0.000334638
B9J08_000445	NA	IBA57	0	-0.0828144	0.592085	0.806733	0.00897393	5.66336	0.000673089				B9J08_001080	NA	PIN2	0	-0.44657	-0.980984	-0.935824	0.00567067	5.57232	0.000343883
B9J08_002443	NA	AGP1	0	0.393235	0.401021	0.796094	0.00927623	8.28467	0.000701315				B9J08_001879	NA	TRM7	0	0.199131	-0.285417	-0.652495	0.00567078	5.54228	0.000346688
B9J08_001854	NA	STP2	0	-0.0595389	0.87895	0.873231	0.00970273	7.01237	0.000756786				B9J08_001906	NA	DIG2	0	0.157731	-0.804761	-0.896108	0.00593001	4.47183	0.000369073
B9J08_003627	HSP21	NA	0	-0.146418	1.03527	1.41531	0.00970273	11.4823	0.000755746				B9J08_003799	MP65	SCW10	0	-0.073472	-0.567034	-0.694863	0.0064016	11.0324	0.000416302
B9J08_001171	ADH5	ADH2	0	-0.26572	1.03414	1.43143	0.00987625	10.6374	0.00077229				B9J08_003526	MUC1	NA	0	0.193984	-0.509838	-2.58916	0.00682872	1.51336	0.000450785
													B9J08_004871	NA	NA	0	0.374449	-0.707055	-0.621343	0.00682872	4.73551	0.000450889
													B9J08_000363	NCE103	NCE103	0	-0.267197	0.0419261	-0.827258	0.00689278	7.75941	0.000456493
													B9J08_000046	NA	UNG1	0	0.174701	-1.06182	-0.93118	0.00696907	4.66022	0.000462936
													B9J08_002723	NA	OPY1	0	-0.115289	-1.12712	-1.00944	0.00743123	5.13339	0.000507142
													B9J08_005186	RPT6	RPT6	0	0.10663	-0.337782	-0.596495	0.00743123	6.93536	0.00050846
													B9J08_002825	NA	NA	0	0.162009	-0.812768	-1.00636	0.00753011	11.7499	0.000523124
													B9J08_001004	NA	MAL13	0	-0.277765	-0.944871	-1.19274	0.00769086	4.36854	0.000541567
													B9J08_005384	MED19	ROX3	0	-0.1203	-0.500152	-0.928111	0.00812034	5.81005	0.000583148
													B9J08_001066	NA	ITC1	0	0.11674	-0.550414	-0.741785	0.00819818	5.80076	0.000595015
													B9J08_000417	CDC24	CDC24	0	-0.391176	-0.61498	-1.30067	0.00885377	5.27218	0.00065348
													B9J08_003372	RPN4	RPN4	0	-0.100921	-0.472105	-0.73463	0.0088903	7.17021	0.000657949
													B9J08_002286	NA	NA	0	-0.208904	-0.576311	-1.16387	0.00890067	5.17716	0.000660493
													B9J08_000088	NA	PAC10	0	0.0566026	-0.642244	-0.592818	0.00934224	6.89444	0.00071376
													B9J08_001195	NA	NA	0	-0.0154185	-0.445245	-0.798532	0.00955062	6.33913	0.000733491
													B9J08_001314	NA	NA	0	0.0453952	-0.65043	-0.74805	0.0095852	5.77982	0.000738059
													B9J08_001930	AOX2	NA	0	-0.523787	-0.715346	-1.16374	0.00960837	10.2558	0.000741759
													B9J08_004536	orf19.3701	NA	0	0.386989	-0.299396	-0.688533	0.00968063	7.05492	0.000749269
													B9J08_004096	NA	LPX1	0	-0.173371	-0.76501	-0.99737	0.00999144	6.18217	0.000783291

[truncated: 19 more sheets: BRG1 vs UME6 in Lac, Fig4E_IRF1_UME6_common_Venn, Fig4E_IRF1_UME6_unique_Venn, Fig4F_heatmap_regulators, Fig4F_heatmap_adhesins, FigS3B_Smooth_Glu vs Lac, FigS3B_Wrinkled_Glu vs Lac, FigS3B_common_up and down_Venn, FigS3B_unique_S vs W_Venn, FigS3C_TFs_upregulated, FigS3C_TFs_downregulated, FigS3D_beta-oxidation, FigS3E_GO analysis glucose, FigS3E_GO analysis lactate, FigS4B_Smooth Lac vs CAS, FigS4B_Wrinkled Lac vs CAS, FigS4B_470121 Lac vs CAS, FigS4B_B8441 Lac vs CAS, FigS4B_B11205 Lac vs CAS]
