# Supplementary material
Source: Research Square preprint supplement (doi:10.21203/rs.3.rs-8008141/v1)
Supplement: Supplementary file 3 [file dd718b0b5384bf7d5a3f86a5.xlsx]

## Sheet: Figure 1E
	Uninfected				Glucose				Lactate				Nigericin
	Replicate 1	Replicate 2	Replicate 3	Mean	Replicate 1	Replicate 2	Replicate 3	Mean	Replicate 1	Replicate 2	Replicate 3	Mean	Replicate 1	Replicate 2	Replicate 3	Mean
Uninfected	224.87	149.213	154.059	176.047
Smooth					114.939	420.065	187.809	240.938	357.718	1095.87	838.338	763.976
Wrinkled					117.537	491.167	317.272	308.658	2197.11	2682.67	3005.56	2628.45
Nigericin													12016	9568.16	12071.1	11218.4

## Sheet: Figure 1F
	Infected					Uninfected					Nigericin
	DMSO	MCC950	MCC6642	Water	KCl	DMSO	MCC950	MCC6642	Water	KCl
Replicate 1	1295.45	425.049	1062.48	970.282	439.565	14.5057	1.3092	5.59495	6.36266	14.8163	5551.88
Replicate 2	2119.17	639.525	1298.2	1456.49	784.212	29.7703	53.3256	32.5485	55.5583	36.9943	6387.96
Replicate 3	2096.38	369.902	2139.95	1484.76	377	69.2474	32.051	88.0928	137.806	109.062	21894.9
Replicate 4	2714.11	482.319	2506.91	1875.91	421.885	69.1118	166.986	169.294	185.336	77.1903	14359.5
Replicate 5	1624.45	508.044	1730.82	1755.32	715.543	114.063	18.7027	13.7524	35.1315	0	10607.9
Mean	1969.91	484.968	1747.67	1508.55	547.641	59.3397	54.475	61.8566	84.0388	47.6126	11760.4
SEM	241.5	45.42	264.8	156.3	83.9	17.43	29.38	30.47	33.46	20.13	2985

## Sheet: Figure 1G
	Infected		Uninfected		Nigericin
	DMSO	R406	DMSO	R406
Replicate 1	1204.17	278.454	106.381	46.8636	21894.9
Replicate 2	1559.17	167.168	56.8359	52.1746	14359.5
Replicate 3	1823.43	60.6086	67.1285	45.5976	10607.9
Mean	1528.93	168.744	76.7818	48.2119	15620.8
SEM	179.4	62.89	15.09	2.015	3319

## Sheet: Figure 1I
ELISA - Human IL1β 16h
	Uninfected	Smooth		Wrinkled		Nigericin
		Glucose	Lactate	Glucose	Lactate
Donor 1	14.594	41.634	38.028	44.657	745.74	1356.78
Donor 2	31.836	62.985	396.27	196.38	853.76	1019.75
Donor 3	146.84	639.67	855.36	933.31	836.27	1408.41
Fold change calculation
	Smooth			Wrinkled
	Glucose	Lactate	Fold change relative to glucose	Glucose	Lactate	Fold change relative to glucose
Donor 1	41.634	38.028	0.913388	44.657	745.74	16.6993
Donor 2	62.985	396.27	6.2915	196.38	853.76	4.34749
Donor 3	639.67	855.36	1.33719	933.31	836.27	0.896026
ELISA - Human TNF𝝰 16h
	Uninfected	Smooth		Wrinkled
		Glucose	Lactate	Glucose	Lactate
Donor 1	9.6164	78.113	191.2	131.11	1110.2
Donor 2	11.779	71.527	445.29	244.29	2054.3
Donor 3	621.168	2503.25	6691.23	2720.49	7970.22
Fold change calculation
	Smooth			Wrinkled
	Glucose	Lactate	Fold change relative to glucose	Glucose	Lactate	Fold change relative to glucose
Donor 1	78.113	191.2	2.44774	131.11	1110.2	8.4677
Donor 2	71.527	445.29	6.22548	244.29	2054.3	8.40927
Donor 3	2503.25	6691.23	2.67302	2720.49	7970.22	2.9297

## Sheet: Figure 2E
	Glucose						Lactate						CAS
	x	Replicate 2	Replicate 3	Replicate 4	Replicate 5	Mean	Replicate 1	Replicate 2	Replicate 3	Replicate 4	Replicate 5	Mean	Replicate 1	Replicate 2	Replicate 3	Replicate 4	Replicate 5	Mean
Smooth	0.057079	0.096157	0.065279	0.075183	0.195213	0.0977822	0.282646	0.567224	0.354279	0.27615	0.719747	0.440009	0.359613	0.34539	0.318146	0.421817	0.462847	0.381563
Wrinkled	0.161413	0.147157	0.202813	0.171917	0.34588	0.205836	0.505413	0.89729	0.676946	0.91125	1.07395	0.812969	0.804879	0.628924	0.748713	0.894417	0.723447	0.760076

## Sheet: Figure 3C
	Glucose						Lactate						CAS
	Replicate 1	Replicate 2	Replicate 3	Replicate 4	Replicate 5	Mean	Replicate 1	Replicate 2	Replicate 3	Replicate 4	Replicate 5	Mean	Replicate 1	Replicate 2	Replicate 3	Replicate 4	Replicate 5	Mean
Wrinkled	0.161413	0.147157	0.202813	0.171917	0.34588	0.205836	0.505413	0.89729	0.676946	0.91125	1.07395	0.812969	0.804879	0.628924	0.748713	0.894417	0.723447	0.760076
Smooth	0.057079	0.096157	0.065279	0.075183	0.195213	0.0977822	0.282646	0.567224	0.354279	0.27615	0.719747	0.440009	0.359613	0.34539	0.318146	0.421817	0.462847	0.381563
B11205	0.171313	0.129524	0.152379	0.207883	0.11148	0.154516	0.234646	0.172624	0.311579	0.62725	0.722813	0.413782	0.316413	0.38899	0.092579	0.46785	0.67388	0.387942
470121	0.103013	0.110857	0.105979	0.126183	0.17358	0.123922	0.432779	0.261357	0.310213	0.459283	0.800413	0.452809	0.294046	0.247424	0.209779	0.287817	0.377447	0.283303
B8441	0.080979	0.061657	0.105479	0.082383	0.110647	0.088229	0.211379	0.17089	0.204046	0.157483	0.266047	0.201969	0.125113	0.168124	0.134679	0.114583	0.265513	0.161602

## Sheet: Figure 3D
	Uninfected					Glucose					Lactate					Casamino acids					Nigericin
	Replicate 1	Replicate 2	Replicate 3	Replicate 4	Mean	Replicate 1	Replicate 2	Replicate 3	Replicate 4	Mean	Replicate 1	Replicate 2	Replicate 3	Replicate 4	Mean	Replicate 1	Replicate 2	Replicate 3	Replicate 4	Mean	Replicate 1	Replicate 2	Replicate 3	Replicate 4	Mean
Uninfected	97.7664	354.033	90.0796	275.264	204.286
Wrinkled						200.385	196.903	172.003	310.455	219.937	1426.83	1098.19	2723.78	2912.96	2040.44	1421.29	1312.77	3087.59	3523.52	2336.29
Smooth						163.147	489.151	152.438	187.286	248.005	375.217	449.01	139.237	513.906	369.342	148.743	310.48	223.837	665.083	337.036
B11205						275.09	397.05	293.443	424.886	347.617	268.814	376.322	336.817	713.488	423.86	227.348	420.411	243.612	589.167	370.135
470121						172.418	180.59	128.085	184.386	166.37	218.767	354.704	123.812	248.675	236.489	136.244	281.245	87.3577	351.891	214.184
B8441						149.078	260.868	118.079	253.905	195.483	182.864	303.124	81.2179	275.461	210.667	132.779	231.515	98.9708	340.08	200.836
Nigericin																					8698.03	11121.8	13873.3	12439.4	11533.1

## Sheet: Figure 4C
	Glucose					Lactate					CAS
	Replicate 1	Replicate 2	Replicate 3	Replicate 4	Mean	Replicate 1	Replicate 2	Replicate 3	Replicate 4	Mean	Replicate 1	Replicate 2	Replicate 3	Replicate 4	Mean
Wrinkled (WT)	0.161413	0.147157	0.202813	0.171917	0.170825	0.505413	0.89729	0.676946	0.91125	0.747725	0.804879	0.628924	0.748713	0.894417	0.769233
Δirf1	0.095713	0.070157	0.102846	0.13175	0.100116	0.563846	0.223357	0.479046	0.538183	0.451108	0.513679	0.348924	0.656679	0.739617	0.564725
Δume6	0.083846	0.07929	0.138679	0.13245	0.108566	0.228046	0.081524	0.155779	0.25145	0.1792	0.260546	0.236057	0.179346	0.193017	0.217242

## Sheet: Figure 5B
	Glucose						Lactate						CAS
	Replicate 1	Replicate 2	Replicate 3	Replicate 4	Replicate 5	Mean	Replicate 1	Replicate 2	Replicate 3	Replicate 4	Replicate 5	Mean	Replicate 1	Replicate 2	Replicate 3	Replicate 4	Replicate 5	Mean
Wrinkled (WT)	0.154342	0.095342	0.253808	0.309787	0.191658	0.200987	0.554342	0.465942	0.703075	0.742153	0.906658	0.674434	0.556742	0.527875	0.833542	1.02915	0.825558	0.754574
Δhgc1	0.104742	0.120475	0.292242	0.22782	0.245758	0.198207	0.393275	0.370542	0.941442	0.781687	0.801625	0.657714	0.509475	0.803042	0.855575	0.73812	0.867125	0.754667
	Glucose						Lactate						CAS
	Replicate 1	Replicate 2	Replicate 3	Replicate 4	Replicate 5	Mean	Replicate 1	Replicate 2	Replicate 3	Replicate 4	Replicate 5	Mean	Replicate 1	Replicate 2	Replicate 3	Replicate 4	Replicate 5	Mean
Wrinkled (WT)	0.240517	0.309787	0.31665	0.179967	0.232067	0.255798	0.66325	0.742153	0.873417	0.589767	0.661667	0.706051	0.71865	1.02915	0.930417	0.632367	0.6607	0.794257
Δscf1	0.06795	0.10742	0.051717	0.103733	0.1414	0.094444	0.210217	0.197187	0.108383	0.165867	0.2039	0.177111	0.25565	0.27222	0.27225	0.272033	0.339767	0.282384

## Sheet: Figure 5C
	Uninfected					Glucose					Lactate					Casamino acids					Nigericin
	Replicate 1	Replicate 2	Replicate 3	Replicate 4	Mean	Replicate 1	Replicate 2	Replicate 3	Replicate 4	Mean	Replicate 1	Replicate 2	Replicate 3	Replicate 4	Mean	Replicate 1	Replicate 2	Replicate 3	Replicate 4	Mean	Replicate 1	Replicate 2	Replicate 3	Replicate 4	Mean
Uninfected	85.9039	77.2379	0	19.576	45.6795
Wrinkled (WT)						121.938	64.2198	97.4365	74.9135	89.627	1469.68	2009.75	2426.38	2636.22	2135.51	3176.27	2101.4	3206.69	2470.11	2738.62
Δhgc1						50.7568	41.2104	66.0273	61.934	54.9821	230.258	294.04	245.404	206.12	243.956	239.957	577.769	284.958	223.994	331.669
Δscf1						26.1459	42.153	41.8091	35.7363	36.4611	1758.65	1256.86	2081.03	1290.39	1596.73	1970.27	2232.45	1943.69	1333.96	1870.09
Nigericin																					14367.2	13948.9	6208.44	6341.76	10216.6

[truncated: 12 more sheets: Figure 5D, Figure 5E, Figure 6A, Figure 6D, Figure 6E, Figure S1A, Figure S1B, Figure S1D, Figure S1E, Figure S2B, Figure S2E, Figure S5]
